# Supplementary material for: ALDH1A1+ cells are endometrial progenitors contributing to regeneration and endometriosis
Source: Research Square preprint supplement (doi:10.21203/rs.3.rs-6831916/v1), 2025-07-08
Supplement: Supplementary file 1 [file 1f58821f66693a6bd44ce014.xlsx]

## Sheet: Human Ect Hi vs EuE Hi
Gene	baseMean	log2FoldChange	lfcSE	stat	pvalue	padj
ENSG00000214039	32.9787	-6.80809	1.79325	-3.79651	0.000146748	0.0238314
ENSG00000170558	1276.39	-6.40031	1.78499	-3.58562	0.000336279	0.0458021
ENSG00000114638	110.83	-6.04287	1.39476	-4.33254	1.47396e-05	0.00406694
ENSG00000258484	30.6595	-5.62762	1.52711	-3.68515	0.000228566	0.033269
ENSG00000131969	36.8557	-4.98013	1.03233	-4.82414	1.40609e-06	0.000727097
ENSG00000241945	134.098	-3.64543	0.865549	-4.2117	2.53452e-05	0.00630421
ENSG00000172461	66.6746	-3.53	0.850997	-4.14807	3.35287e-05	0.00741852
ENSG00000152804	306.332	-3.347	0.849854	-3.93832	8.2053e-05	0.0156538
ENSG00000182013	218.684	-3.21555	0.798894	-4.025	5.69742e-05	0.0116619
ENSG00000007968	33.4087	-3.04004	0.820597	-3.70467	0.000211668	0.0310394
ENSG00000100504	2241.23	-2.38187	0.555934	-4.28444	1.83198e-05	0.00473664
ENSG00000182472	140.458	-2.31616	0.335394	-6.90579	4.9926e-12	1.22631e-08
ENSG00000182378	236.646	-2.06179	0.574288	-3.59017	0.000330458	0.0457289
ENSG00000160867	121.18	-1.90096	0.425938	-4.46299	8.08253e-06	0.00240639
ENSG00000012223	96.0945	-1.77083	0.405165	-4.37064	1.23883e-05	0.00352798
ENSG00000198435	91.3208	-1.74298	0.461051	-3.78044	0.000156548	0.0248079
ENSG00000188517	239.833	-1.64844	0.342124	-4.81825	1.44826e-06	0.000729701
ENSG00000035499	311.135	-1.63894	0.362176	-4.52526	6.03219e-06	0.00194316
ENSG00000161791	247.267	-1.63612	0.433875	-3.77094	0.000162635	0.0253634
ENSG00000100031	416.102	-1.09644	0.280168	-3.91351	9.09654e-05	0.0170449
ENSG00000197956	7950.77	0.945772	0.210338	4.49644	6.91005e-06	0.0021216
ENSG00000153113	2609.76	1.02528	0.2527	4.0573	4.96437e-05	0.0103776
ENSG00000163191	4825	1.05147	0.230325	4.56515	4.99126e-06	0.00166234
ENSG00000143507	454.536	1.15456	0.295793	3.90327	9.49022e-05	0.0174283
ENSG00000115594	4620.44	1.25219	0.302875	4.13434	3.55982e-05	0.00777227
ENSG00000188064	465.22	1.28162	0.341507	3.75284	0.000174842	0.0267338
ENSG00000273748	125.347	1.29564	0.355984	3.6396	0.000273061	0.0383261
ENSG00000156587	724.781	1.32934	0.244981	5.4263	5.75333e-08	5.13877e-05
ENSG00000172062	385.283	1.40119	0.326655	4.2895	1.79075e-05	0.00469176
ENSG00000160932	3054.62	1.42067	0.359271	3.95431	7.67563e-05	0.0149333
ENSG00000175906	233.2	1.46023	0.319555	4.56958	4.88705e-06	0.0016615
ENSG00000154310	138.596	1.57571	0.422716	3.72758	0.000193326	0.0287791
ENSG00000104324	158.662	1.57628	0.429772	3.6677	0.000244738	0.0349968
ENSG00000107819	396.884	1.58155	0.401284	3.94123	8.10643e-05	0.0156168
ENSG00000116106	366.05	1.58245	0.319638	4.95077	7.3921e-07	0.000468563
ENSG00000165434	350.229	1.5981	0.33294	4.79998	1.58683e-06	0.000758326
ENSG00000102781	94.7346	1.59886	0.370136	4.31965	1.56276e-05	0.00414977
ENSG00000117472	4792.36	1.62855	0.429617	3.7907	0.000150221	0.0241954
ENSG00000125508	61.4873	1.70525	0.445896	3.82433	0.00013113	0.0218365
ENSG00000109452	593.717	1.72878	0.404487	4.27401	1.91985e-05	0.00489934
ENSG00000184584	1212.62	1.76231	0.451778	3.90084	9.58594e-05	0.0174411
ENSG00000125531	97.5106	1.76759	0.438381	4.03208	5.52842e-05	0.0114351
ENSG00000180155	86.1347	1.85959	0.438206	4.24365	2.19909e-05	0.00554001
ENSG00000020633	581.498	1.88524	0.469107	4.01878	5.85008e-05	0.0118385
ENSG00000182175	226.07	1.92031	0.509723	3.76735	0.00016499	0.025528
ENSG00000197457	791.785	1.93689	0.385804	5.0204	5.15648e-07	0.000355118
ENSG00000270127	73.9475	2.01471	0.485517	4.14962	3.33028e-05	0.00741852
ENSG00000168461	217.993	2.04249	0.326986	6.2464	4.20033e-10	6.34896e-07
ENSG00000189127	154.445	2.07768	0.583001	3.56377	0.00036556	0.0482098
ENSG00000167755	142.9	2.08626	0.534429	3.90372	9.47241e-05	0.0174283
ENSG00000123095	621.303	2.0896	0.503042	4.15393	3.26813e-05	0.00741852
ENSG00000108950	2064.53	2.10416	0.581972	3.61557	0.000299689	0.0417651
ENSG00000140280	47.6419	2.10556	0.517891	4.06564	4.7901e-05	0.010121
ENSG00000171346	116.549	2.1889	0.468353	4.67361	2.95955e-06	0.00111837
ENSG00000158055	108.774	2.24322	0.58002	3.86748	0.000109965	0.0189469
ENSG00000125384	203.897	2.24851	0.417804	5.38173	7.37722e-08	6.30271e-05
ENSG00000128394	157.914	2.24946	0.481015	4.67649	2.91825e-06	0.00111837
ENSG00000076641	25.1004	2.26572	0.620029	3.65421	0.000257973	0.0364689
ENSG00000213793	160.858	2.26737	0.604327	3.75189	0.000175504	0.0267338
ENSG00000157064	810.241	2.27095	0.472272	4.80856	1.52019e-06	0.000746792
ENSG00000060558	100.652	2.31364	0.472506	4.89653	9.75422e-07	0.000532418
ENSG00000151117	133.277	2.37328	0.513015	4.62613	3.7256e-06	0.00133105
ENSG00000127084	84.3887	2.39697	0.627489	3.81994	0.000133487	0.0220421
ENSG00000137501	58.4677	2.3972	0.482463	4.96866	6.74162e-07	0.000441576
ENSG00000131620	175.606	2.46874	0.691913	3.568	0.000359722	0.0480853
ENSG00000049130	420.57	2.52923	0.581456	4.34982	1.36252e-05	0.0038248
ENSG00000227039	85.3591	2.56013	0.59192	4.32512	1.52448e-05	0.00410358
ENSG00000244509	418.088	2.58012	0.480375	5.37104	7.82835e-08	6.40947e-05
ENSG00000198286	727.039	2.59411	0.588843	4.40543	1.05575e-05	0.00309633
ENSG00000197249	3266.69	2.62013	0.563089	4.65314	3.26911e-06	0.00118959
ENSG00000138316	82.6207	2.62401	0.483037	5.43233	5.56241e-08	5.13877e-05
ENSG00000108602	138.079	2.63351	0.681295	3.86545	0.000110885	0.0189469
ENSG00000115935	69.2548	2.64566	0.468901	5.64227	1.67827e-08	1.83212e-05
ENSG00000214814	20.6016	2.69685	0.751611	3.5881	0.000333101	0.0457723
ENSG00000133321	1453.9	2.7654	0.539859	5.12244	3.016e-07	0.00022794
ENSG00000240065	277	2.78399	0.723564	3.8476	0.00011928	0.0202056
ENSG00000111962	34.7479	2.88105	0.688683	4.18341	2.87163e-05	0.00696636
ENSG00000109743	15.7395	2.99687	0.800251	3.74492	0.000180453	0.0272762
ENSG00000183778	48.5156	3.02046	0.687519	4.39328	1.11652e-05	0.0032264
ENSG00000174059	77.0286	3.05346	0.677775	4.50512	6.63346e-06	0.00210238
ENSG00000115414	2674.66	3.07584	0.837181	3.67404	0.000238743	0.0344949
ENSG00000000971	199.882	3.10388	0.601468	5.1605	2.4629e-07	0.000193584
ENSG00000086548	850.927	3.11828	0.840873	3.70838	0.000208592	0.0308182
ENSG00000065618	476.125	3.16434	0.689503	4.58931	4.4471e-06	0.00156045
ENSG00000099994	179.462	3.20681	0.575477	5.57244	2.51193e-08	2.59787e-05
ENSG00000176153	107.872	3.23753	0.817813	3.95877	7.53371e-05	0.0148836
ENSG00000120885	16650.6	3.24045	0.806762	4.01661	5.90419e-05	0.0118385
ENSG00000170579	141.055	3.32115	0.529794	6.26875	3.63954e-10	5.95975e-07
ENSG00000148344	286.537	3.34639	0.682193	4.90534	9.32675e-07	0.000532418
ENSG00000188505	38.717	3.42522	0.961005	3.56421	0.000364958	0.0482098
ENSG00000180638	136.039	3.43188	0.957476	3.5843	0.00033798	0.0458021
ENSG00000129455	38.3217	3.43506	0.897829	3.82597	0.00013026	0.0218365
ENSG00000170954	28.1685	3.46816	0.846357	4.09775	4.17184e-05	0.0089105
ENSG00000173467	780.62	3.48746	0.777265	4.48683	7.22899e-06	0.00218538
ENSG00000133710	81.9504	3.50272	0.473449	7.39831	1.37931e-13	6.77584e-10
ENSG00000230937	62.1385	3.52294	0.47959	7.34573	2.04637e-13	8.04223e-10
ENSG00000206075	46.1569	3.63494	0.771524	4.71138	2.46049e-06	0.000986706
ENSG00000162654	145.982	3.65762	0.534233	6.84649	7.5685e-12	1.56366e-08
ENSG00000134775	99.5382	3.70122	0.889335	4.16178	3.1577e-05	0.00729987
ENSG00000005249	218.389	3.82346	0.927044	4.12435	3.71778e-05	0.00802796
ENSG00000170477	55.0973	3.82914	0.781531	4.89954	9.6063e-07	0.000532418
ENSG00000107742	1169.55	3.87959	0.820412	4.72883	2.25822e-06	0.000944126
ENSG00000105388	271.889	3.88595	0.824088	4.71546	2.41166e-06	0.000986706
ENSG00000188039	447.527	3.96386	1.02383	3.87161	0.000108117	0.0189469
ENSG00000261115	36.0662	4.11417	0.861929	4.77321	1.8131e-06	0.000774509
ENSG00000166402	33.821	4.22438	0.881731	4.79101	1.65944e-06	0.000758326
ENSG00000148735	804.885	4.29397	0.915605	4.68976	2.73527e-06	0.00107496
ENSG00000134138	25.3296	4.31722	1.10789	3.8968	9.74738e-05	0.0175721
ENSG00000111913	70.6205	4.31895	1.11681	3.86724	0.000110076	0.0189469
ENSG00000136244	20.7897	4.3416	0.908782	4.77739	1.77587e-06	0.000774509
ENSG00000250305	107.391	4.34816	1.15245	3.77299	0.000161304	0.025357
ENSG00000183049	130.583	4.40418	0.794992	5.53991	3.02634e-08	2.97338e-05
ENSG00000155761	301.892	4.44961	1.07282	4.14758	3.36004e-05	0.00741852
ENSG00000164920	22.4427	4.46674	1.15406	3.87046	0.000108628	0.0189469
ENSG00000242779	78.7015	4.5099	0.968816	4.65506	3.2388e-06	0.00118959
ENSG00000133328	104.047	4.57019	1.09719	4.16536	3.10863e-05	0.00727197
ENSG00000237945	63.8165	4.57643	1.20819	3.78785	0.000151957	0.024276
ENSG00000133067	25.4216	4.61126	1.18703	3.88468	0.000102463	0.0183036
ENSG00000140795	137.328	4.67517	1.30722	3.57643	0.000348313	0.0468791
ENSG00000118849	209.603	4.84179	0.679211	7.12855	1.01429e-12	3.32179e-09
ENSG00000186891	44.8712	4.94831	1.38942	3.56142	0.000368849	0.0483192
ENSG00000171401	296.637	4.95564	0.724582	6.83931	7.95755e-12	1.56366e-08
ENSG00000088726	14.1805	5.04177	1.34999	3.73467	0.00018796	0.028194
ENSG00000127507	29.7726	5.10527	1.0374	4.92122	8.60085e-07	0.000528146
ENSG00000104368	703.932	5.14494	0.651075	7.90222	2.7397e-15	1.7945e-11
ENSG00000100604	306.675	5.15742	1.23561	4.17398	2.99321e-05	0.00717276
ENSG00000189377	25.949	5.16981	1.0304	5.01728	5.24092e-07	0.000355118
ENSG00000197353	30.4828	5.18177	1.23305	4.20241	2.64089e-05	0.00648668
ENSG00000166405	49.9442	5.18611	1.15203	4.50171	6.74087e-06	0.00210251
ENSG00000232415	46.1779	5.28943	1.44259	3.66662	0.000245779	0.0349968
ENSG00000198125	47.7291	5.35997	1.28559	4.16929	3.05556e-05	0.00723394
ENSG00000075340	52.6312	5.36419	0.875438	6.12744	8.93057e-10	1.25347e-06
ENSG00000128872	18.5385	5.44712	1.37641	3.95748	7.57434e-05	0.0148836
ENSG00000237988	81.7289	5.57847	0.987836	5.64716	1.63118e-08	1.83212e-05
ENSG00000239713	164.7	5.87016	0.71853	8.16968	3.09215e-16	3.03804e-12
ENSG00000096006	44.2454	5.94099	0.995361	5.96868	2.39184e-09	2.93748e-06
ENSG00000187908	57.3052	6.03319	1.25927	4.79103	1.65929e-06	0.000758326
ENSG00000264230	10.1708	6.0703	1.59499	3.80585	0.000141318	0.0231408
ENSG00000124749	47.6561	6.08905	1.2057	5.05023	4.41283e-07	0.000321156
ENSG00000189280	15.2671	6.6783	1.54228	4.33014	1.49018e-05	0.00406694
ENSG00000253348	163.333	6.68602	0.955115	7.00022	2.55564e-12	7.17405e-09
ENSG00000147689	59.8787	6.74767	1.41266	4.77656	1.7832e-06	0.000774509
ENSG00000205420	32.5009	6.81128	1.49698	4.55001	5.36431e-06	0.00175681
ENSG00000120594	73.2032	6.97464	1.16148	6.00496	1.91377e-09	2.50704e-06
ENSG00000175785	39.1694	7.11936	1.46945	4.8449	1.26674e-06	0.000672742
ENSG00000186081	154.525	7.13443	0.661304	10.7884	3.90433e-27	7.67201e-23
ENSG00000135272	11.525	7.24864	1.58654	4.56885	4.90418e-06	0.0016615
ENSG00000240694	13.6584	7.49855	1.91622	3.9132	9.10796e-05	0.0170449
ENSG00000148826	56.3717	8.57501	1.74763	4.90666	9.26411e-07	0.000532418
ENSG00000227403	34.8617	8.84527	1.36006	6.5036	7.84201e-11	1.40087e-07

## Sheet: UP, p<0.05, L2FC1
Gene	baseMean	log2FoldChange	lfcSE	stat	pvalue	padj
ENSG00000197956	7950.77	0.945772	0.210338	4.49644	6.91005e-06	0.0021216
ENSG00000153113	2609.76	1.02528	0.2527	4.0573	4.96437e-05	0.0103776
ENSG00000163191	4825	1.05147	0.230325	4.56515	4.99126e-06	0.00166234
ENSG00000143507	454.536	1.15456	0.295793	3.90327	9.49022e-05	0.0174283
ENSG00000115594	4620.44	1.25219	0.302875	4.13434	3.55982e-05	0.00777227
ENSG00000188064	465.22	1.28162	0.341507	3.75284	0.000174842	0.0267338
ENSG00000273748	125.347	1.29564	0.355984	3.6396	0.000273061	0.0383261
ENSG00000156587	724.781	1.32934	0.244981	5.4263	5.75333e-08	5.13877e-05
ENSG00000172062	385.283	1.40119	0.326655	4.2895	1.79075e-05	0.00469176
ENSG00000160932	3054.62	1.42067	0.359271	3.95431	7.67563e-05	0.0149333
ENSG00000175906	233.2	1.46023	0.319555	4.56958	4.88705e-06	0.0016615
ENSG00000154310	138.596	1.57571	0.422716	3.72758	0.000193326	0.0287791
ENSG00000104324	158.662	1.57628	0.429772	3.6677	0.000244738	0.0349968
ENSG00000107819	396.884	1.58155	0.401284	3.94123	8.10643e-05	0.0156168
ENSG00000116106	366.05	1.58245	0.319638	4.95077	7.3921e-07	0.000468563
ENSG00000165434	350.229	1.5981	0.33294	4.79998	1.58683e-06	0.000758326
ENSG00000102781	94.7346	1.59886	0.370136	4.31965	1.56276e-05	0.00414977
ENSG00000117472	4792.36	1.62855	0.429617	3.7907	0.000150221	0.0241954
ENSG00000125508	61.4873	1.70525	0.445896	3.82433	0.00013113	0.0218365
ENSG00000109452	593.717	1.72878	0.404487	4.27401	1.91985e-05	0.00489934
ENSG00000184584	1212.62	1.76231	0.451778	3.90084	9.58594e-05	0.0174411
ENSG00000125531	97.5106	1.76759	0.438381	4.03208	5.52842e-05	0.0114351
ENSG00000180155	86.1347	1.85959	0.438206	4.24365	2.19909e-05	0.00554001
ENSG00000020633	581.498	1.88524	0.469107	4.01878	5.85008e-05	0.0118385
ENSG00000182175	226.07	1.92031	0.509723	3.76735	0.00016499	0.025528
ENSG00000197457	791.785	1.93689	0.385804	5.0204	5.15648e-07	0.000355118
ENSG00000270127	73.9475	2.01471	0.485517	4.14962	3.33028e-05	0.00741852
ENSG00000168461	217.993	2.04249	0.326986	6.2464	4.20033e-10	6.34896e-07
ENSG00000189127	154.445	2.07768	0.583001	3.56377	0.00036556	0.0482098
ENSG00000167755	142.9	2.08626	0.534429	3.90372	9.47241e-05	0.0174283
ENSG00000123095	621.303	2.0896	0.503042	4.15393	3.26813e-05	0.00741852
ENSG00000108950	2064.53	2.10416	0.581972	3.61557	0.000299689	0.0417651
ENSG00000140280	47.6419	2.10556	0.517891	4.06564	4.7901e-05	0.010121
ENSG00000171346	116.549	2.1889	0.468353	4.67361	2.95955e-06	0.00111837
ENSG00000158055	108.774	2.24322	0.58002	3.86748	0.000109965	0.0189469
ENSG00000125384	203.897	2.24851	0.417804	5.38173	7.37722e-08	6.30271e-05
ENSG00000128394	157.914	2.24946	0.481015	4.67649	2.91825e-06	0.00111837
ENSG00000076641	25.1004	2.26572	0.620029	3.65421	0.000257973	0.0364689
ENSG00000213793	160.858	2.26737	0.604327	3.75189	0.000175504	0.0267338
ENSG00000157064	810.241	2.27095	0.472272	4.80856	1.52019e-06	0.000746792
ENSG00000060558	100.652	2.31364	0.472506	4.89653	9.75422e-07	0.000532418
ENSG00000151117	133.277	2.37328	0.513015	4.62613	3.7256e-06	0.00133105
ENSG00000127084	84.3887	2.39697	0.627489	3.81994	0.000133487	0.0220421
ENSG00000137501	58.4677	2.3972	0.482463	4.96866	6.74162e-07	0.000441576
ENSG00000131620	175.606	2.46874	0.691913	3.568	0.000359722	0.0480853
ENSG00000049130	420.57	2.52923	0.581456	4.34982	1.36252e-05	0.0038248
ENSG00000227039	85.3591	2.56013	0.59192	4.32512	1.52448e-05	0.00410358
ENSG00000244509	418.088	2.58012	0.480375	5.37104	7.82835e-08	6.40947e-05
ENSG00000198286	727.039	2.59411	0.588843	4.40543	1.05575e-05	0.00309633
ENSG00000197249	3266.69	2.62013	0.563089	4.65314	3.26911e-06	0.00118959
ENSG00000138316	82.6207	2.62401	0.483037	5.43233	5.56241e-08	5.13877e-05
ENSG00000108602	138.079	2.63351	0.681295	3.86545	0.000110885	0.0189469
ENSG00000115935	69.2548	2.64566	0.468901	5.64227	1.67827e-08	1.83212e-05
ENSG00000214814	20.6016	2.69685	0.751611	3.5881	0.000333101	0.0457723
ENSG00000133321	1453.9	2.7654	0.539859	5.12244	3.016e-07	0.00022794
ENSG00000240065	277	2.78399	0.723564	3.8476	0.00011928	0.0202056
ENSG00000111962	34.7479	2.88105	0.688683	4.18341	2.87163e-05	0.00696636
ENSG00000109743	15.7395	2.99687	0.800251	3.74492	0.000180453	0.0272762
ENSG00000183778	48.5156	3.02046	0.687519	4.39328	1.11652e-05	0.0032264
ENSG00000174059	77.0286	3.05346	0.677775	4.50512	6.63346e-06	0.00210238
ENSG00000115414	2674.66	3.07584	0.837181	3.67404	0.000238743	0.0344949
ENSG00000000971	199.882	3.10388	0.601468	5.1605	2.4629e-07	0.000193584
ENSG00000086548	850.927	3.11828	0.840873	3.70838	0.000208592	0.0308182
ENSG00000065618	476.125	3.16434	0.689503	4.58931	4.4471e-06	0.00156045
ENSG00000099994	179.462	3.20681	0.575477	5.57244	2.51193e-08	2.59787e-05
ENSG00000176153	107.872	3.23753	0.817813	3.95877	7.53371e-05	0.0148836
ENSG00000120885	16650.6	3.24045	0.806762	4.01661	5.90419e-05	0.0118385
ENSG00000170579	141.055	3.32115	0.529794	6.26875	3.63954e-10	5.95975e-07
ENSG00000148344	286.537	3.34639	0.682193	4.90534	9.32675e-07	0.000532418
ENSG00000188505	38.717	3.42522	0.961005	3.56421	0.000364958	0.0482098
ENSG00000180638	136.039	3.43188	0.957476	3.5843	0.00033798	0.0458021
ENSG00000129455	38.3217	3.43506	0.897829	3.82597	0.00013026	0.0218365
ENSG00000170954	28.1685	3.46816	0.846357	4.09775	4.17184e-05	0.0089105
ENSG00000173467	780.62	3.48746	0.777265	4.48683	7.22899e-06	0.00218538
ENSG00000133710	81.9504	3.50272	0.473449	7.39831	1.37931e-13	6.77584e-10
ENSG00000230937	62.1385	3.52294	0.47959	7.34573	2.04637e-13	8.04223e-10
ENSG00000206075	46.1569	3.63494	0.771524	4.71138	2.46049e-06	0.000986706
ENSG00000162654	145.982	3.65762	0.534233	6.84649	7.5685e-12	1.56366e-08
ENSG00000134775	99.5382	3.70122	0.889335	4.16178	3.1577e-05	0.00729987
ENSG00000005249	218.389	3.82346	0.927044	4.12435	3.71778e-05	0.00802796
ENSG00000170477	55.0973	3.82914	0.781531	4.89954	9.6063e-07	0.000532418
ENSG00000107742	1169.55	3.87959	0.820412	4.72883	2.25822e-06	0.000944126
ENSG00000105388	271.889	3.88595	0.824088	4.71546	2.41166e-06	0.000986706
ENSG00000188039	447.527	3.96386	1.02383	3.87161	0.000108117	0.0189469
ENSG00000261115	36.0662	4.11417	0.861929	4.77321	1.8131e-06	0.000774509
ENSG00000166402	33.821	4.22438	0.881731	4.79101	1.65944e-06	0.000758326
ENSG00000148735	804.885	4.29397	0.915605	4.68976	2.73527e-06	0.00107496
ENSG00000134138	25.3296	4.31722	1.10789	3.8968	9.74738e-05	0.0175721
ENSG00000111913	70.6205	4.31895	1.11681	3.86724	0.000110076	0.0189469
ENSG00000136244	20.7897	4.3416	0.908782	4.77739	1.77587e-06	0.000774509
ENSG00000250305	107.391	4.34816	1.15245	3.77299	0.000161304	0.025357
ENSG00000183049	130.583	4.40418	0.794992	5.53991	3.02634e-08	2.97338e-05
ENSG00000155761	301.892	4.44961	1.07282	4.14758	3.36004e-05	0.00741852
ENSG00000164920	22.4427	4.46674	1.15406	3.87046	0.000108628	0.0189469
ENSG00000242779	78.7015	4.5099	0.968816	4.65506	3.2388e-06	0.00118959
ENSG00000133328	104.047	4.57019	1.09719	4.16536	3.10863e-05	0.00727197
ENSG00000237945	63.8165	4.57643	1.20819	3.78785	0.000151957	0.024276
ENSG00000133067	25.4216	4.61126	1.18703	3.88468	0.000102463	0.0183036
ENSG00000140795	137.328	4.67517	1.30722	3.57643	0.000348313	0.0468791
ENSG00000118849	209.603	4.84179	0.679211	7.12855	1.01429e-12	3.32179e-09
ENSG00000186891	44.8712	4.94831	1.38942	3.56142	0.000368849	0.0483192
ENSG00000171401	296.637	4.95564	0.724582	6.83931	7.95755e-12	1.56366e-08
ENSG00000088726	14.1805	5.04177	1.34999	3.73467	0.00018796	0.028194
ENSG00000127507	29.7726	5.10527	1.0374	4.92122	8.60085e-07	0.000528146
ENSG00000104368	703.932	5.14494	0.651075	7.90222	2.7397e-15	1.7945e-11
ENSG00000100604	306.675	5.15742	1.23561	4.17398	2.99321e-05	0.00717276
ENSG00000189377	25.949	5.16981	1.0304	5.01728	5.24092e-07	0.000355118
ENSG00000197353	30.4828	5.18177	1.23305	4.20241	2.64089e-05	0.00648668
ENSG00000166405	49.9442	5.18611	1.15203	4.50171	6.74087e-06	0.00210251
ENSG00000232415	46.1779	5.28943	1.44259	3.66662	0.000245779	0.0349968
ENSG00000198125	47.7291	5.35997	1.28559	4.16929	3.05556e-05	0.00723394
ENSG00000075340	52.6312	5.36419	0.875438	6.12744	8.93057e-10	1.25347e-06
ENSG00000128872	18.5385	5.44712	1.37641	3.95748	7.57434e-05	0.0148836
ENSG00000237988	81.7289	5.57847	0.987836	5.64716	1.63118e-08	1.83212e-05
ENSG00000239713	164.7	5.87016	0.71853	8.16968	3.09215e-16	3.03804e-12
ENSG00000096006	44.2454	5.94099	0.995361	5.96868	2.39184e-09	2.93748e-06
ENSG00000187908	57.3052	6.03319	1.25927	4.79103	1.65929e-06	0.000758326
ENSG00000264230	10.1708	6.0703	1.59499	3.80585	0.000141318	0.0231408
ENSG00000124749	47.6561	6.08905	1.2057	5.05023	4.41283e-07	0.000321156
ENSG00000189280	15.2671	6.6783	1.54228	4.33014	1.49018e-05	0.00406694
ENSG00000253348	163.333	6.68602	0.955115	7.00022	2.55564e-12	7.17405e-09
ENSG00000147689	59.8787	6.74767	1.41266	4.77656	1.7832e-06	0.000774509
ENSG00000205420	32.5009	6.81128	1.49698	4.55001	5.36431e-06	0.00175681
ENSG00000120594	73.2032	6.97464	1.16148	6.00496	1.91377e-09	2.50704e-06
ENSG00000175785	39.1694	7.11936	1.46945	4.8449	1.26674e-06	0.000672742
ENSG00000186081	154.525	7.13443	0.661304	10.7884	3.90433e-27	7.67201e-23	KRT5
ENSG00000135272	11.525	7.24864	1.58654	4.56885	4.90418e-06	0.0016615
ENSG00000240694	13.6584	7.49855	1.91622	3.9132	9.10796e-05	0.0170449
ENSG00000148826	56.3717	8.57501	1.74763	4.90666	9.26411e-07	0.000532418	NKX6-2
ENSG00000227403	34.8617	8.84527	1.36006	6.5036	7.84201e-11	1.40087e-07

## Sheet: DN, p<0.05, L2FC1
Gene	baseMean	log2FoldChange	lfcSE	stat	pvalue	padj
ENSG00000214039	32.9787	-6.80809	1.79325	-3.79651	0.000146748	0.0238314
ENSG00000170558	1276.39	-6.40031	1.78499	-3.58562	0.000336279	0.0458021
ENSG00000114638	110.83	-6.04287	1.39476	-4.33254	1.47396e-05	0.00406694
ENSG00000258484	30.6595	-5.62762	1.52711	-3.68515	0.000228566	0.033269
ENSG00000131969	36.8557	-4.98013	1.03233	-4.82414	1.40609e-06	0.000727097
ENSG00000241945	134.098	-3.64543	0.865549	-4.2117	2.53452e-05	0.00630421
ENSG00000172461	66.6746	-3.53	0.850997	-4.14807	3.35287e-05	0.00741852
ENSG00000152804	306.332	-3.347	0.849854	-3.93832	8.2053e-05	0.0156538
ENSG00000182013	218.684	-3.21555	0.798894	-4.025	5.69742e-05	0.0116619
ENSG00000007968	33.4087	-3.04004	0.820597	-3.70467	0.000211668	0.0310394
ENSG00000100504	2241.23	-2.38187	0.555934	-4.28444	1.83198e-05	0.00473664
ENSG00000182472	140.458	-2.31616	0.335394	-6.90579	4.9926e-12	1.22631e-08
ENSG00000182378	236.646	-2.06179	0.574288	-3.59017	0.000330458	0.0457289
ENSG00000160867	121.18	-1.90096	0.425938	-4.46299	8.08253e-06	0.00240639
ENSG00000012223	96.0945	-1.77083	0.405165	-4.37064	1.23883e-05	0.00352798
ENSG00000198435	91.3208	-1.74298	0.461051	-3.78044	0.000156548	0.0248079
ENSG00000188517	239.833	-1.64844	0.342124	-4.81825	1.44826e-06	0.000729701
ENSG00000035499	311.135	-1.63894	0.362176	-4.52526	6.03219e-06	0.00194316
ENSG00000161791	247.267	-1.63612	0.433875	-3.77094	0.000162635	0.0253634
ENSG00000100031	416.102	-1.09644	0.280168	-3.91351	9.09654e-05	0.0170449

## Sheet: UP_EctvEuEHi_GO
ID	Description	GeneRatio	Count	geneID	p.adjust
GO:0050900	leukocyte migration	0.106195	12	IL1R1/KITLG/BST1/CD34/RIPOR2/IL6/CAMK1D/TNFRSF18/ADGRE2/CHGA/CXCL17/ADD2	0.00831036
GO:0045785	positive regulation of cell adhesion	0.0884956	10	DUSP10/EPHA4/RUNX3/KITLG/CARD11/FN1/CEACAM6/SPOCK2/IL6/TNFRSF18	0.0334887
GO:0097529	myeloid leukocyte migration	0.079646	9	IL1R1/KITLG/BST1/RIPOR2/IL6/CAMK1D/ADGRE2/CHGA/CXCL17	0.0115874
GO:0008544	epidermis development	0.079646	9	KRT15/GRHL3/PLAAT4/COL17A1/SPINK5/KRT4/GJB5/KRT6A/KRT5	0.030483
GO:0002685	regulation of leukocyte migration	0.0707965	8	IL1R1/KITLG/BST1/RIPOR2/IL6/CAMK1D/TNFRSF18/CXCL17	0.0116931
GO:0045861	negative regulation of proteolysis	0.0707965	8	CAST/EPHA4/SERPINA1/SPINK5/SERPINB5/SPOCK2/PLAT/ANXA8L1	0.0120569
GO:0052547	regulation of peptidase activity	0.0707965	8	CAST/EPHA4/SERPINA1/PSMB9/SPINK5/SERPINB5/SPOCK2/ANXA8L1	0.0323238
GO:0002687	positive regulation of leukocyte migration	0.0619469	7	IL1R1/KITLG/RIPOR2/IL6/CAMK1D/TNFRSF18/CXCL17	0.0115874
GO:0031099	regeneration	0.0619469	7	DUSP10/CPQ/EPHA4/RGMA/KLK6/IL6/LGR6	0.0169085
GO:0030595	leukocyte chemotaxis	0.0619469	7	BST1/RIPOR2/IL6/CAMK1D/ADGRE2/CHGA/CXCL17	0.032762
GO:0006959	humoral immune response	0.0619469	7	BST1/CFH/CLU/SPINK5/IL6/DMBT1/KRT6A	0.0408275
GO:0010466	negative regulation of peptidase activity	0.0530973	6	CAST/SERPINA1/SPINK5/SERPINB5/SPOCK2/ANXA8L1	0.0169085
GO:0097530	granulocyte migration	0.0530973	6	IL1R1/BST1/RIPOR2/CAMK1D/ADGRE2/CXCL17	0.0240284
GO:0045109	intermediate filament organization	0.0442478	5	KRT15/KRT4/KRT13/KRT6A/KRT5	0.0116931
GO:0045104	intermediate filament cytoskeleton organization	0.0442478	5	KRT15/KRT4/KRT13/KRT6A/KRT5	0.0193394
GO:0045103	intermediate filament-based process	0.0442478	5	KRT15/KRT4/KRT13/KRT6A/KRT5	0.0195046
GO:0002526	acute inflammatory response	0.0442478	5	SERPINA1/FN1/PTGES/IL6/MYLK3	0.0281745
GO:0050830	defense response to Gram-positive bacterium	0.0442478	5	GBP4/IL6/CHGA/DMBT1/KRT6A	0.0356907
GO:0002688	regulation of leukocyte chemotaxis	0.0442478	5	BST1/RIPOR2/IL6/CAMK1D/CXCL17	0.0408275
GO:0010951	negative regulation of endopeptidase activity	0.0442478	5	CAST/SERPINA1/SERPINB5/SPOCK2/ANXA8L1	0.0408275
GO:0071621	granulocyte chemotaxis	0.0442478	5	BST1/RIPOR2/CAMK1D/ADGRE2/CXCL17	0.0408275
GO:1902622	regulation of neutrophil migration	0.0353982	4	IL1R1/BST1/RIPOR2/CAMK1D	0.0169085
GO:0006953	acute-phase response	0.0353982	4	SERPINA1/FN1/PTGES/IL6	0.0169085
GO:0071622	regulation of granulocyte chemotaxis	0.0353982	4	BST1/RIPOR2/CAMK1D/CXCL17	0.020085
GO:0045123	cellular extravasation	0.0353982	4	IL1R1/BST1/RIPOR2/ADD2	0.0408275
GO:0042246	tissue regeneration	0.0353982	4	DUSP10/CPQ/KLK6/LGR6	0.0408275
GO:0045685	regulation of glial cell differentiation	0.0353982	4	DUSP10/EPHA4/IL6/NKX6-2	0.0448714
GO:0006216	cytidine catabolic process	0.0265487	3	APOBEC3F/APOBEC3C/APOBEC3G	0.0115874
GO:0009972	cytidine deamination	0.0265487	3	APOBEC3F/APOBEC3C/APOBEC3G	0.0115874
GO:0016554	cytidine to uridine editing	0.0265487	3	APOBEC3F/APOBEC3C/APOBEC3G	0.0115874
GO:0046087	cytidine metabolic process	0.0265487	3	APOBEC3F/APOBEC3C/APOBEC3G	0.0115874
GO:0045006	DNA deamination	0.0265487	3	APOBEC3F/APOBEC3C/APOBEC3G	0.0116931
GO:0046131	pyrimidine ribonucleoside metabolic process	0.0265487	3	APOBEC3F/APOBEC3C/APOBEC3G	0.0116931
GO:0046133	pyrimidine ribonucleoside catabolic process	0.0265487	3	APOBEC3F/APOBEC3C/APOBEC3G	0.0116931
GO:0045869	negative regulation of single stranded viral RNA replication via double stranded DNA intermediate	0.0265487	3	APOBEC3F/APOBEC3C/APOBEC3G	0.0135259
GO:0046135	pyrimidine nucleoside catabolic process	0.0265487	3	APOBEC3F/APOBEC3C/APOBEC3G	0.0135259
GO:0016553	base conversion or substitution editing	0.0265487	3	APOBEC3F/APOBEC3C/APOBEC3G	0.0169085
GO:0045091	regulation of single stranded viral RNA replication via double stranded DNA intermediate	0.0265487	3	APOBEC3F/APOBEC3C/APOBEC3G	0.0169085
GO:0039692	single stranded viral RNA replication via double stranded DNA intermediate	0.0265487	3	APOBEC3F/APOBEC3C/APOBEC3G	0.0176466
GO:0042454	ribonucleoside catabolic process	0.0265487	3	APOBEC3F/APOBEC3C/APOBEC3G	0.0176466
GO:0006213	pyrimidine nucleoside metabolic process	0.0265487	3	APOBEC3F/APOBEC3C/APOBEC3G	0.0252906
GO:0009164	nucleoside catabolic process	0.0265487	3	APOBEC3F/APOBEC3C/APOBEC3G	0.0276276
GO:0045745	positive regulation of G protein-coupled receptor signaling pathway	0.0265487	3	KLK6/CHGA/TMOD2	0.0315649
GO:0034656	nucleobase-containing small molecule catabolic process	0.0265487	3	APOBEC3F/APOBEC3C/APOBEC3G	0.0347465
GO:0039694	viral RNA genome replication	0.0265487	3	APOBEC3F/APOBEC3C/APOBEC3G	0.0364164
GO:0002230	positive regulation of defense response to virus by host	0.0265487	3	STING1/APOBEC3F/APOBEC3G	0.0408275
GO:0080111	DNA demethylation	0.0265487	3	APOBEC3F/APOBEC3C/APOBEC3G	0.0408275
GO:0010526	retrotransposon silencing	0.0265487	3	APOBEC3F/APOBEC3C/APOBEC3G	0.0408275
GO:0090022	regulation of neutrophil chemotaxis	0.0265487	3	BST1/RIPOR2/CAMK1D	0.0408275
GO:1901658	glycosyl compound catabolic process	0.0265487	3	APOBEC3F/APOBEC3C/APOBEC3G	0.0408275
GO:1902624	positive regulation of neutrophil migration	0.0265487	3	IL1R1/RIPOR2/CAMK1D	0.0408275
GO:0009119	ribonucleoside metabolic process	0.0265487	3	APOBEC3F/APOBEC3C/APOBEC3G	0.0428005
GO:0032197	retrotransposition	0.0265487	3	APOBEC3F/APOBEC3C/APOBEC3G	0.0448714
GO:0032196	transposition	0.0265487	3	APOBEC3F/APOBEC3C/APOBEC3G	0.0490149
GO:0035510	DNA dealkylation	0.0265487	3	APOBEC3F/APOBEC3C/APOBEC3G	0.0490149
GO:0072529	pyrimidine-containing compound catabolic process	0.0265487	3	APOBEC3F/APOBEC3C/APOBEC3G	0.0490149
GO:0097050	type B pancreatic cell apoptotic process	0.0176991	2	CAST/IL6	0.0490149
GO:2000659	regulation of interleukin-1-mediated signaling pathway	0.0176991	2	IL1R1/IL6	0.0490149
