# Supplementary material for: ALDH1A1+ cells are endometrial progenitors contributing to regeneration and endometriosis
Source: Research Square preprint supplement (doi:10.21203/rs.3.rs-6831916/v1), 2025-07-08
Supplement: Supplementary file 3 [file 50b576b36aa8b15047a0e4ca.xlsx]

## Sheet: Human organoids_EuE ALDH HivsLo
Gene ID	Gene Name	baseMean	log2FoldChange	lfcSE	stat	pvalue	padj
ENSG00000181234	TMEM132C	17.5798	-7.60507	1.47471	-5.15698	2.50963e-07	0.000674058
ENSG00000117501	MROH9	24.3718	-7.10275	1.61876	-4.38778	1.14515e-05	0.00779213
ENSG00000148826	NKX6-2	15.0639	-6.40539	1.88036	-3.40648	0.00065807	0.0862928
ENSG00000165383	LRRC18	6.0221	-6.05798	1.57445	-3.84769	0.000119236	0.0286044
ENSG00000155849	ELMO1	18.5897	-5.77729	1.37544	-4.20031	2.66553e-05	0.0146434
ENSG00000237988	OR2I1P	108.763	-5.74482	1.62489	-3.53551	0.000406987	0.0595849
ENSG00000142173	COL6A2	26.085	-5.73662	1.46889	-3.90542	9.40611e-05	0.0254131
ENSG00000186081	KRT5	43.8685	-5.05294	1.24174	-4.06925	4.71649e-05	0.0200794
ENSG00000128510	CPA4	21.8944	-4.9673	1.34046	-3.70568	0.000210828	0.0391901
ENSG00000122194	PLG	33.7244	-4.59047	1.30237	-3.52472	0.00042393	0.0610939
ENSG00000135074	ADAM19	30.9605	-4.36693	1.20729	-3.61713	0.000297883	0.0480028
ENSG00000154545	MAGED4	35.2273	-4.01913	0.860002	-4.67339	2.96262e-06	0.00320173
ENSG00000185681	MORN5	58.2571	-3.96581	0.828602	-4.78615	1.70011e-06	0.00195215
ENSG00000206075	SERPINB5	63.6422	-3.91475	0.988445	-3.96051	7.47897e-05	0.0238306
ENSG00000133067	LGR6	15.3992	-3.60591	0.972552	-3.70768	0.000209167	0.0391901
ENSG00000232415	ELN-AS1	17.6683	-3.60123	0.902096	-3.99207	6.55001e-05	0.0218794
ENSG00000166592	RRAD	145.395	-3.44527	0.932363	-3.6952	0.000219715	0.0395745
ENSG00000142156	COL6A1	246.642	-3.24359	0.803127	-4.0387	5.37489e-05	0.0210672
ENSG00000187601	MAGEH1	53.7878	-3.18761	0.707831	-4.50334	6.68934e-06	0.00514439
ENSG00000173627	APOBEC4	33.9873	-3.14161	0.831698	-3.77734	0.00015851	0.034478
ENSG00000186471	AKAP14	28.1431	-3.13776	0.936577	-3.35025	0.000807393	0.0982346
ENSG00000230062	ANKRD66	40.7912	-3.12993	0.884932	-3.53692	0.000404821	0.0595849
ENSG00000198046	ZNF667	69.4814	-3.12428	0.904691	-3.45342	0.000553517	0.0751824
ENSG00000181378	CFAP65	135.871	-3.09505	0.635824	-4.86779	1.12856e-06	0.00138226
ENSG00000159713	TPPP3	804.863	-3.04056	0.711951	-4.27075	1.9482e-05	0.0119308
ENSG00000166770	ZNF667-AS1	45.5215	-3.00802	0.855009	-3.51811	0.00043463	0.0614232
ENSG00000111962	UST	41.8706	-2.9982	0.877335	-3.4174	0.000632232	0.0841693
ENSG00000164972	C9orf24	156.103	-2.99129	0.797321	-3.75168	0.000175657	0.0363215
ENSG00000250510	GPR162	27.4814	-2.97209	0.813639	-3.65283	0.000259361	0.0441202
ENSG00000257057	C11orf97	37.1314	-2.97068	0.751673	-3.95208	7.74735e-05	0.0239106
ENSG00000166402	TUB	17.6929	-2.96942	0.79439	-3.738	0.000185494	0.0370423
ENSG00000136918	WDR38	136.36	-2.96682	0.828	-3.58312	0.000339515	0.0524165
ENSG00000004838	ZMYND10	271.312	-2.95347	0.523338	-5.64353	1.66596e-08	0.000102024
ENSG00000250305	TRMT9B	50.9653	-2.9464	0.805648	-3.65718	0.000255007	0.0437849
ENSG00000145198	VWA5B2	26.9508	-2.94259	0.584474	-5.03459	4.78869e-07	0.000793427
ENSG00000157330	C1orf158	35.6664	-2.92242	0.805093	-3.62991	0.000283518	0.0465072
ENSG00000198003	CCDC151	44.2138	-2.92014	0.573498	-5.09181	3.54653e-07	0.000723966
ENSG00000111913	RIPOR2	33.2488	-2.90172	0.823652	-3.52299	0.000426704	0.0610939
ENSG00000215187	FAM166B	98.3417	-2.89232	0.744871	-3.88298	0.000103184	0.0270813
ENSG00000206199	ANKUB1	37.7191	-2.89022	0.765467	-3.77577	0.000159516	0.034478
ENSG00000112539	C6orf118	60.1837	-2.88007	0.715524	-4.02512	5.69472e-05	0.0210672
ENSG00000188523	CFAP77	107.385	-2.86943	0.730286	-3.92918	8.5236e-05	0.0239106
ENSG00000091181	IL5RA	61.9458	-2.82655	0.701233	-4.03083	5.55793e-05	0.0210672
ENSG00000168589	DYNLRB2	58.9809	-2.82247	0.562309	-5.01943	5.18241e-07	0.000793427
ENSG00000034239	EFCAB1	129.348	-2.82209	0.837793	-3.36848	0.000755838	0.0951114
ENSG00000243910	TUBA4B	91.116	-2.81218	0.754123	-3.72907	0.000192188	0.0375625
ENSG00000169126	ARMC4	62.7278	-2.80128	0.673949	-4.15652	3.23133e-05	0.0156226
ENSG00000124237	C20orf85	245.101	-2.79852	0.73975	-3.78306	0.000154913	0.0342899
ENSG00000260220	CCDC187	184.39	-2.79843	0.682455	-4.10053	4.12213e-05	0.0181938
ENSG00000179902	C1orf194	102.316	-2.78792	0.665006	-4.19232	2.76114e-05	0.0146434
ENSG00000166963	MAP1A	104.352	-2.77096	0.599277	-4.62384	3.76695e-06	0.00346032
ENSG00000228723	SRGAP3-AS2	30.5128	-2.76645	0.68757	-4.02352	5.7335e-05	0.0210672
ENSG00000117115	PADI2	75.9614	-2.76391	0.411663	-6.71402	1.89329e-11	3.47836e-07
ENSG00000152611	CAPSL	89.1447	-2.75943	0.679274	-4.06232	4.85867e-05	0.0200794
ENSG00000122735	DNAI1	117.903	-2.70997	0.69003	-3.92732	8.5897e-05	0.0239106
ENSG00000189350	TOGARAM2	61.3869	-2.70379	0.684928	-3.94756	7.89533e-05	0.0239106
ENSG00000215217	C5orf49	166.409	-2.67855	0.596071	-4.49368	7.00031e-06	0.00514439
ENSG00000179813	FAM216B	279.712	-2.66085	0.736082	-3.61489	0.000300475	0.0480028
ENSG00000159625	DRC7	112.927	-2.64713	0.741368	-3.57061	0.000356156	0.0539531
ENSG00000169064	ZBBX	78.8298	-2.63711	0.637035	-4.13966	3.47825e-05	0.0159756
ENSG00000167992	VWCE	183.368	-2.62482	0.770931	-3.40474	0.000662273	0.0862928
ENSG00000145491	ROPN1L	164.225	-2.623	0.639997	-4.09845	4.15925e-05	0.0181938
ENSG00000226321	CROCC2	93.5053	-2.61139	0.686573	-3.80352	0.000142653	0.0322185
ENSG00000158486	DNAH3	124.962	-2.58217	0.688864	-3.74845	0.00017793	0.0363215
ENSG00000160838	LRRC71	58.7192	-2.52287	0.513183	-4.91612	8.82756e-07	0.00123565
ENSG00000078900	TP73	62.9528	-2.45806	0.683493	-3.59632	0.000322751	0.0502506
ENSG00000166596	CFAP52	137.852	-2.43432	0.603613	-4.03292	5.50878e-05	0.0210672
ENSG00000104237	RP1	54.6038	-2.42838	0.631346	-3.84636	0.000119886	0.0286044
ENSG00000258752	AL357093.2	51.1115	-2.40196	0.686258	-3.50008	0.000465113	0.0652295
ENSG00000174776	WDR49	30.395	-2.39905	0.561103	-4.2756	1.90625e-05	0.0119308
ENSG00000204950	LRRC10B	101.265	-2.39204	0.614025	-3.89567	9.79274e-05	0.0260742
ENSG00000105479	CCDC114	101.304	-2.38555	0.687061	-3.47211	0.00051639	0.0718722
ENSG00000111834	RSPH4A	182.675	-2.33615	0.593096	-3.93892	8.18507e-05	0.0239106
ENSG00000100218	RSPH14	19.169	-2.32922	0.652356	-3.57047	0.000356341	0.0539531
ENSG00000168658	VWA3B	112.129	-2.32015	0.691723	-3.35416	0.000796074	0.0975031
ENSG00000150873	C2orf50	31.1247	-2.31861	0.604999	-3.83242	0.000126888	0.0295087
ENSG00000165164	CFAP47	72.71	-2.29984	0.621343	-3.70139	0.000214418	0.0391901
ENSG00000175267	VWA3A	112.873	-2.29821	0.647113	-3.55148	0.00038307	0.0572176
ENSG00000162004	CCDC78	235.572	-2.27256	0.450095	-5.04906	4.43985e-07	0.000793427
ENSG00000153347	FAM81B	85.7528	-2.26446	0.575602	-3.93407	8.35203e-05	0.0239106
ENSG00000186710	CFAP73	110.452	-2.24272	0.535258	-4.18999	2.78968e-05	0.0146434
ENSG00000165923	AGBL2	42.83	-2.20676	0.598158	-3.68926	0.000224909	0.0401167
ENSG00000155761	SPAG17	84.4427	-2.16421	0.567547	-3.81327	0.000137138	0.0314937
ENSG00000008226	DLEC1	148.093	-2.16414	0.42206	-5.12756	2.93515e-07	0.000674058
ENSG00000169314	C22orf15	25.8258	-2.12545	0.601354	-3.53443	0.000408649	0.0595849
ENSG00000198624	CCDC69	89.5873	-2.06133	0.526825	-3.91275	9.12507e-05	0.0250218
ENSG00000206113	CFAP99	50.8	-2.03918	0.56177	-3.62992	0.000283509	0.0465072
ENSG00000183914	DNAH2	136.365	-2.00395	0.580527	-3.45195	0.000556543	0.0751824
ENSG00000115423	DNAH6	155.65	-2.00376	0.555897	-3.60456	0.000312683	0.0495226
ENSG00000224383	PRR29	143.018	-1.99096	0.430352	-4.62636	3.72151e-06	0.00346032
ENSG00000243836	WDR86-AS1	240.336	-1.98546	0.514802	-3.85674	0.000114911	0.0285289
ENSG00000170629	DPY19L2P2	57.6218	-1.97672	0.497551	-3.9729	7.10031e-05	0.0232941
ENSG00000141294	LRRC46	250.416	-1.97481	0.514793	-3.83612	0.000124992	0.0294404
ENSG00000110318	CEP126	109.27	-1.97242	0.33348	-5.91466	3.32566e-09	3.05496e-05
ENSG00000105877	DNAH11	89.8055	-1.97166	0.584029	-3.37596	0.000735585	0.0932012
ENSG00000152076	CCDC74B	38.8786	-1.96564	0.463624	-4.23973	2.23788e-05	0.0128483
ENSG00000163491	NEK10	64.3171	-1.9197	0.443152	-4.33193	1.47807e-05	0.00969828
ENSG00000120262	CCDC170	200.311	-1.91821	0.345763	-5.54776	2.89355e-08	0.000130381
ENSG00000167552	TUBA1A	2614.82	-1.90974	0.449296	-4.25052	2.1327e-05	0.0126394
ENSG00000100077	GRK3	167.578	-1.8482	0.360133	-5.13201	2.86669e-07	0.000674058
ENSG00000159588	CCDC17	116.287	-1.819	0.526828	-3.45273	0.000554937	0.0751824
ENSG00000163040	CCDC74A	76.7537	-1.80768	0.467269	-3.86861	0.000109459	0.0276356
ENSG00000101222	SPEF1	143.43	-1.75905	0.45479	-3.86783	0.000109808	0.0276356
ENSG00000140527	WDR93	49.6752	-1.7073	0.478362	-3.56905	0.000358278	0.0539531
ENSG00000154099	DNAAF1	382.255	-1.69336	0.422434	-4.00858	6.10842e-05	0.0211743
ENSG00000186952	TMEM232	60.4409	-1.68493	0.478459	-3.52159	0.000428974	0.0610939
ENSG00000197748	CFAP43	273.715	-1.68457	0.40401	-4.16962	3.05106e-05	0.0151497
ENSG00000188659	SAXO2	133.456	-1.62991	0.3937	-4.13998	3.47337e-05	0.0159756
ENSG00000137691	C11orf70	103.311	-1.59871	0.326036	-4.90347	9.41598e-07	0.00123565
ENSG00000158423	RIBC1	99.8031	-1.57562	0.465821	-3.38246	0.000718397	0.0916555
ENSG00000243710	CFAP57	123.271	-1.57185	0.397023	-3.9591	7.52326e-05	0.0238306
ENSG00000173013	CCDC96	103.713	-1.56649	0.452404	-3.46259	0.000535	0.0739024
ENSG00000160188	RSPH1	481.956	-1.53661	0.409928	-3.74848	0.000177911	0.0363215
ENSG00000095637	SORBS1	332.888	-1.49021	0.324193	-4.59668	4.29276e-06	0.00375555
ENSG00000010626	LRRC23	319.428	-1.49009	0.443108	-3.36281	0.000771528	0.0960347
ENSG00000105472	CLEC11A	77.9875	-1.43032	0.356079	-4.01687	5.89758e-05	0.0211743
ENSG00000197653	DNAH10	91.793	-1.38416	0.375564	-3.68554	0.000228215	0.040315
ENSG00000167646	DNAAF3	128.698	-1.33936	0.329935	-4.05948	4.9182e-05	0.0200794
ENSG00000167281	RBFOX3	614.774	-1.31229	0.390663	-3.35914	0.000781853	0.096404
ENSG00000008517	IL32	2048.55	-1.28021	0.380781	-3.36206	0.00077363	0.0960347
ENSG00000160401	CFAP157	206.086	-1.27181	0.337933	-3.76348	0.000167563	0.0357962
ENSG00000139537	CCDC65	165.872	-1.22132	0.263951	-4.62708	3.70861e-06	0.00346032
ENSG00000081059	TCF7	200.93	-1.16197	0.321265	-3.61685	0.000298213	0.0480028
ENSG00000161714	PLCD3	1433.7	-1.02777	0.27987	-3.67231	0.000240364	0.0420569
ENSG00000103021	CCDC113	352.238	-0.99258	0.290654	-3.41499	0.000637853	0.0843068
ENSG00000157423	HYDIN	458.148	-0.984292	0.26913	-3.65731	0.000254872	0.0437849
ENSG00000143878	RHOB	1288.71	-0.878424	0.2374	-3.70018	0.000215448	0.0391901
ENSG00000182158	CREB3L2	1209.92	0.78191	0.215075	3.63553	0.000277412	0.0463328
ENSG00000055609	KMT2C	2493.3	0.831862	0.230971	3.60158	0.000316286	0.049665
ENSG00000230535	BASP1P1	1011.02	1.27086	0.317022	4.00873	6.10469e-05	0.0211743
ENSG00000262619	LINC00621	785.406	1.30343	0.331662	3.92999	8.49485e-05	0.0239106
ENSG00000159212	CLIC6	313.866	1.41972	0.320197	4.4339	9.25426e-06	0.0065392
ENSG00000166450	PRTG	273.58	1.42956	0.392075	3.64613	0.000266217	0.044871
ENSG00000153246	PLA2R1	320.083	1.43143	0.384665	3.72123	0.000198255	0.0383404
ENSG00000112276	BVES	55.4155	1.524	0.411555	3.70301	0.000213054	0.0391901
ENSG00000099250	NRP1	1270.24	1.68141	0.495169	3.39563	0.000684718	0.088589
ENSG00000101115	SALL4	69.5901	1.73702	0.504814	3.44091	0.000579761	0.0777472
ENSG00000154898	CCDC144CP	31.7823	1.73761	0.451346	3.84985	0.000118189	0.0286044
ENSG00000272899	AC025594.2	73.8049	1.87931	0.506443	3.71081	0.000206597	0.0391901
ENSG00000100968	NFATC4	128.36	2.20591	0.484811	4.55004	5.36367e-06	0.00447915
ENSG00000135253	KCP	428.55	2.23004	0.565111	3.9462	7.94005e-05	0.0239106
ENSG00000244300	GATA2-AS1	30.0704	2.48376	0.66349	3.74347	0.000181495	0.0366421
ENSG00000092068	SLC7A8	150.069	2.71531	0.727143	3.73422	0.000188295	0.0371975
ENSG00000179348	GATA2	34.4592	2.71811	0.679473	4.00032	6.32557e-05	0.021521
ENSG00000127249	ATP13A4	39.5208	2.7471	0.61038	4.50063	6.77527e-06	0.00514439
ENSG00000166106	ADAMTS15	414.064	2.89146	0.691415	4.18195	2.89024e-05	0.0147499
ENSG00000248144	ADH1C	65.9459	2.96702	0.78048	3.80154	0.000143801	0.0322185
ENSG00000107736	CDH23	26.8878	3.08096	0.908518	3.39119	0.000695887	0.0894044
ENSG00000258484	SPESP1	25.6026	3.98589	1.03013	3.86929	0.000109153	0.0276356
ENSG00000166292	TMEM100	89.6686	4.1637	1.10758	3.75929	0.000170394	0.0359824
ENSG00000152785	BMP3	79.4949	6.2711	1.13772	5.51197	3.54837e-08	0.000130381

## Sheet: DN, p<0.05, L2FC1
Gene ID	Gene Name	baseMean	log2FoldChange	lfcSE	stat	pvalue	padj
ENSG00000117115	PADI2	75.9614	-2.76391	0.411663	-6.71402	1.89329e-11	3.47836e-07
ENSG00000110318	CEP126	109.27	-1.97242	0.33348	-5.91466	3.32566e-09	3.05496e-05
ENSG00000004838	ZMYND10	271.312	-2.95347	0.523338	-5.64353	1.66596e-08	0.000102024
ENSG00000120262	CCDC170	200.311	-1.91821	0.345763	-5.54776	2.89355e-08	0.000130381
ENSG00000181234	TMEM132C	17.5798	-7.60507	1.47471	-5.15698	2.50963e-07	0.000674058
ENSG00000008226	DLEC1	148.093	-2.16414	0.42206	-5.12756	2.93515e-07	0.000674058
ENSG00000100077	GRK3	167.578	-1.8482	0.360133	-5.13201	2.86669e-07	0.000674058
ENSG00000198003	CCDC151	44.2138	-2.92014	0.573498	-5.09181	3.54653e-07	0.000723966
ENSG00000145198	VWA5B2	26.9508	-2.94259	0.584474	-5.03459	4.78869e-07	0.000793427
ENSG00000168589	DYNLRB2	58.9809	-2.82247	0.562309	-5.01943	5.18241e-07	0.000793427
ENSG00000162004	CCDC78	235.572	-2.27256	0.450095	-5.04906	4.43985e-07	0.000793427
ENSG00000160838	LRRC71	58.7192	-2.52287	0.513183	-4.91612	8.82756e-07	0.00123565
ENSG00000137691	C11orf70	103.311	-1.59871	0.326036	-4.90347	9.41598e-07	0.00123565
ENSG00000181378	CFAP65	135.871	-3.09505	0.635824	-4.86779	1.12856e-06	0.00138226
ENSG00000185681	MORN5	58.2571	-3.96581	0.828602	-4.78615	1.70011e-06	0.00195215
ENSG00000154545	MAGED4	35.2273	-4.01913	0.860002	-4.67339	2.96262e-06	0.00320173
ENSG00000166963	MAP1A	104.352	-2.77096	0.599277	-4.62384	3.76695e-06	0.00346032
ENSG00000224383	PRR29	143.018	-1.99096	0.430352	-4.62636	3.72151e-06	0.00346032
ENSG00000139537	CCDC65	165.872	-1.22132	0.263951	-4.62708	3.70861e-06	0.00346032
ENSG00000095637	SORBS1	332.888	-1.49021	0.324193	-4.59668	4.29276e-06	0.00375555
ENSG00000187601	MAGEH1	53.7878	-3.18761	0.707831	-4.50334	6.68934e-06	0.00514439
ENSG00000215217	C5orf49	166.409	-2.67855	0.596071	-4.49368	7.00031e-06	0.00514439
ENSG00000117501	MROH9	24.3718	-7.10275	1.61876	-4.38778	1.14515e-05	0.00779213
ENSG00000163491	NEK10	64.3171	-1.9197	0.443152	-4.33193	1.47807e-05	0.00969828
ENSG00000159713	TPPP3	804.863	-3.04056	0.711951	-4.27075	1.9482e-05	0.0119308
ENSG00000174776	WDR49	30.395	-2.39905	0.561103	-4.2756	1.90625e-05	0.0119308
ENSG00000167552	TUBA1A	2614.82	-1.90974	0.449296	-4.25052	2.1327e-05	0.0126394
ENSG00000152076	CCDC74B	38.8786	-1.96564	0.463624	-4.23973	2.23788e-05	0.0128483
ENSG00000155849	ELMO1	18.5897	-5.77729	1.37544	-4.20031	2.66553e-05	0.0146434
ENSG00000179902	C1orf194	102.316	-2.78792	0.665006	-4.19232	2.76114e-05	0.0146434
ENSG00000186710	CFAP73	110.452	-2.24272	0.535258	-4.18999	2.78968e-05	0.0146434
ENSG00000197748	CFAP43	273.715	-1.68457	0.40401	-4.16962	3.05106e-05	0.0151497
ENSG00000169126	ARMC4	62.7278	-2.80128	0.673949	-4.15652	3.23133e-05	0.0156226
ENSG00000169064	ZBBX	78.8298	-2.63711	0.637035	-4.13966	3.47825e-05	0.0159756
ENSG00000188659	SAXO2	133.456	-1.62991	0.3937	-4.13998	3.47337e-05	0.0159756
ENSG00000260220	CCDC187	184.39	-2.79843	0.682455	-4.10053	4.12213e-05	0.0181938
ENSG00000145491	ROPN1L	164.225	-2.623	0.639997	-4.09845	4.15925e-05	0.0181938
ENSG00000186081	KRT5	43.8685	-5.05294	1.24174	-4.06925	4.71649e-05	0.0200794
ENSG00000152611	CAPSL	89.1447	-2.75943	0.679274	-4.06232	4.85867e-05	0.0200794
ENSG00000167646	DNAAF3	128.698	-1.33936	0.329935	-4.05948	4.9182e-05	0.0200794
ENSG00000142156	COL6A1	246.642	-3.24359	0.803127	-4.0387	5.37489e-05	0.0210672
ENSG00000112539	C6orf118	60.1837	-2.88007	0.715524	-4.02512	5.69472e-05	0.0210672
ENSG00000091181	IL5RA	61.9458	-2.82655	0.701233	-4.03083	5.55793e-05	0.0210672
ENSG00000228723	SRGAP3-AS2	30.5128	-2.76645	0.68757	-4.02352	5.7335e-05	0.0210672
ENSG00000166596	CFAP52	137.852	-2.43432	0.603613	-4.03292	5.50878e-05	0.0210672
ENSG00000154099	DNAAF1	382.255	-1.69336	0.422434	-4.00858	6.10842e-05	0.0211743
ENSG00000105472	CLEC11A	77.9875	-1.43032	0.356079	-4.01687	5.89758e-05	0.0211743
ENSG00000232415	ELN-AS1	17.6683	-3.60123	0.902096	-3.99207	6.55001e-05	0.0218794
ENSG00000170629	DPY19L2P2	57.6218	-1.97672	0.497551	-3.9729	7.10031e-05	0.0232941
ENSG00000206075	SERPINB5	63.6422	-3.91475	0.988445	-3.96051	7.47897e-05	0.0238306
ENSG00000243710	CFAP57	123.271	-1.57185	0.397023	-3.9591	7.52326e-05	0.0238306
ENSG00000257057	C11orf97	37.1314	-2.97068	0.751673	-3.95208	7.74735e-05	0.0239106
ENSG00000188523	CFAP77	107.385	-2.86943	0.730286	-3.92918	8.5236e-05	0.0239106
ENSG00000122735	DNAI1	117.903	-2.70997	0.69003	-3.92732	8.5897e-05	0.0239106
ENSG00000189350	TOGARAM2	61.3869	-2.70379	0.684928	-3.94756	7.89533e-05	0.0239106
ENSG00000111834	RSPH4A	182.675	-2.33615	0.593096	-3.93892	8.18507e-05	0.0239106
ENSG00000153347	FAM81B	85.7528	-2.26446	0.575602	-3.93407	8.35203e-05	0.0239106
ENSG00000198624	CCDC69	89.5873	-2.06133	0.526825	-3.91275	9.12507e-05	0.0250218
ENSG00000142173	COL6A2	26.085	-5.73662	1.46889	-3.90542	9.40611e-05	0.0254131
ENSG00000204950	LRRC10B	101.265	-2.39204	0.614025	-3.89567	9.79274e-05	0.0260742
ENSG00000215187	FAM166B	98.3417	-2.89232	0.744871	-3.88298	0.000103184	0.0270813
ENSG00000163040	CCDC74A	76.7537	-1.80768	0.467269	-3.86861	0.000109459	0.0276356
ENSG00000101222	SPEF1	143.43	-1.75905	0.45479	-3.86783	0.000109808	0.0276356
ENSG00000243836	WDR86-AS1	240.336	-1.98546	0.514802	-3.85674	0.000114911	0.0285289
ENSG00000165383	LRRC18	6.0221	-6.05798	1.57445	-3.84769	0.000119236	0.0286044
ENSG00000104237	RP1	54.6038	-2.42838	0.631346	-3.84636	0.000119886	0.0286044
ENSG00000141294	LRRC46	250.416	-1.97481	0.514793	-3.83612	0.000124992	0.0294404
ENSG00000150873	C2orf50	31.1247	-2.31861	0.604999	-3.83242	0.000126888	0.0295087
ENSG00000155761	SPAG17	84.4427	-2.16421	0.567547	-3.81327	0.000137138	0.0314937
ENSG00000226321	CROCC2	93.5053	-2.61139	0.686573	-3.80352	0.000142653	0.0322185
ENSG00000124237	C20orf85	245.101	-2.79852	0.73975	-3.78306	0.000154913	0.0342899
ENSG00000173627	APOBEC4	33.9873	-3.14161	0.831698	-3.77734	0.00015851	0.034478
ENSG00000206199	ANKUB1	37.7191	-2.89022	0.765467	-3.77577	0.000159516	0.034478
ENSG00000160401	CFAP157	206.086	-1.27181	0.337933	-3.76348	0.000167563	0.0357962
ENSG00000164972	C9orf24	156.103	-2.99129	0.797321	-3.75168	0.000175657	0.0363215
ENSG00000158486	DNAH3	124.962	-2.58217	0.688864	-3.74845	0.00017793	0.0363215
ENSG00000160188	RSPH1	481.956	-1.53661	0.409928	-3.74848	0.000177911	0.0363215
ENSG00000166402	TUB	17.6929	-2.96942	0.79439	-3.738	0.000185494	0.0370423
ENSG00000243910	TUBA4B	91.116	-2.81218	0.754123	-3.72907	0.000192188	0.0375625
ENSG00000128510	CPA4	21.8944	-4.9673	1.34046	-3.70568	0.000210828	0.0391901
ENSG00000133067	LGR6	15.3992	-3.60591	0.972552	-3.70768	0.000209167	0.0391901
ENSG00000165164	CFAP47	72.71	-2.29984	0.621343	-3.70139	0.000214418	0.0391901
ENSG00000143878	RHOB	1288.71	-0.878424	0.2374	-3.70018	0.000215448	0.0391901
ENSG00000166592	RRAD	145.395	-3.44527	0.932363	-3.6952	0.000219715	0.0395745
ENSG00000165923	AGBL2	42.83	-2.20676	0.598158	-3.68926	0.000224909	0.0401167
ENSG00000197653	DNAH10	91.793	-1.38416	0.375564	-3.68554	0.000228215	0.040315
ENSG00000161714	PLCD3	1433.7	-1.02777	0.27987	-3.67231	0.000240364	0.0420569
ENSG00000250305	TRMT9B	50.9653	-2.9464	0.805648	-3.65718	0.000255007	0.0437849
ENSG00000157423	HYDIN	458.148	-0.984292	0.26913	-3.65731	0.000254872	0.0437849
ENSG00000250510	GPR162	27.4814	-2.97209	0.813639	-3.65283	0.000259361	0.0441202
ENSG00000157330	C1orf158	35.6664	-2.92242	0.805093	-3.62991	0.000283518	0.0465072
ENSG00000206113	CFAP99	50.8	-2.03918	0.56177	-3.62992	0.000283509	0.0465072
ENSG00000135074	ADAM19	30.9605	-4.36693	1.20729	-3.61713	0.000297883	0.0480028
ENSG00000179813	FAM216B	279.712	-2.66085	0.736082	-3.61489	0.000300475	0.0480028
ENSG00000081059	TCF7	200.93	-1.16197	0.321265	-3.61685	0.000298213	0.0480028
ENSG00000115423	DNAH6	155.65	-2.00376	0.555897	-3.60456	0.000312683	0.0495226

## Sheet: UP, p<0.05, L2FC1
Gene ID	Gene Name	baseMean	log2FoldChange	lfcSE	stat	pvalue	padj
ENSG00000152785	BMP3	79.4949	6.2711	1.13772	5.51197	3.54837e-08	0.000130381
ENSG00000100968	NFATC4	128.36	2.20591	0.484811	4.55004	5.36367e-06	0.00447915
ENSG00000127249	ATP13A4	39.5208	2.7471	0.61038	4.50063	6.77527e-06	0.00514439
ENSG00000159212	CLIC6	313.866	1.41972	0.320197	4.4339	9.25426e-06	0.0065392
ENSG00000166106	ADAMTS15	414.064	2.89146	0.691415	4.18195	2.89024e-05	0.0147499
ENSG00000230535	BASP1P1	1011.02	1.27086	0.317022	4.00873	6.10469e-05	0.0211743
ENSG00000179348	GATA2	34.4592	2.71811	0.679473	4.00032	6.32557e-05	0.021521
ENSG00000262619	LINC00621	785.406	1.30343	0.331662	3.92999	8.49485e-05	0.0239106
ENSG00000135253	KCP	428.55	2.23004	0.565111	3.9462	7.94005e-05	0.0239106
ENSG00000258484	SPESP1	25.6026	3.98589	1.03013	3.86929	0.000109153	0.0276356
ENSG00000154898	CCDC144CP	31.7823	1.73761	0.451346	3.84985	0.000118189	0.0286044
ENSG00000248144	ADH1C	65.9459	2.96702	0.78048	3.80154	0.000143801	0.0322185
ENSG00000166292	TMEM100	89.6686	4.1637	1.10758	3.75929	0.000170394	0.0359824
ENSG00000244300	GATA2-AS1	30.0704	2.48376	0.66349	3.74347	0.000181495	0.0366421
ENSG00000092068	SLC7A8	150.069	2.71531	0.727143	3.73422	0.000188295	0.0371975
ENSG00000153246	PLA2R1	320.083	1.43143	0.384665	3.72123	0.000198255	0.0383404
ENSG00000112276	BVES	55.4155	1.524	0.411555	3.70301	0.000213054	0.0391901
ENSG00000272899	AC025594.2	73.8049	1.87931	0.506443	3.71081	0.000206597	0.0391901
ENSG00000166450	PRTG	273.58	1.42956	0.392075	3.64613	0.000266217	0.044871
ENSG00000182158	CREB3L2	1209.92	0.78191	0.215075	3.63553	0.000277412	0.0463328
ENSG00000055609	KMT2C	2493.3	0.831862	0.230971	3.60158	0.000316286	0.049665

## Sheet: DOWN_HivLo_GO
ID	Description	GeneRatio	Count	geneID	p.adjust
GO:0035082	axoneme assembly	18/62	18	ZMYND10/ODAD3/CFAP65/CCDC65/CFAP73/CFAP43/ODAD2/DNAAF3/DNAAF1/DNAI1/RSPH4A/SPEF1/RP1/SPAG17/CFAP157/RSPH1/CFAP47/HYDIN	7.93858e-25
GO:0001578	microtubule bundle formation	19/62	19	ZMYND10/ODAD3/CFAP65/CCDC65/TPPP3/CFAP73/CFAP43/ODAD2/DNAAF3/DNAAF1/DNAI1/RSPH4A/SPEF1/RP1/SPAG17/CFAP157/RSPH1/CFAP47/HYDIN	8.63354e-25
GO:0003341	cilium movement	21/62	21	ZMYND10/ODAD3/CFAP65/CCDC65/NEK10/CFAP73/CFAP43/ODAD2/ROPN1L/CFAP52/DNAAF1/DNAI1/RSPH4A/SPEF1/SPAG17/CFAP157/DNAH3/CFAP47/DNAH10/HYDIN/DNAH6	3.58732e-24
GO:0007018	microtubule-based movement	25/62	25	ZMYND10/ODAD3/DYNLRB2/CFAP65/MAP1A/CCDC65/NEK10/TUBA1A/CFAP73/CFAP43/ODAD2/ROPN1L/CFAP52/DNAAF1/DNAI1/RSPH4A/SPEF1/SPAG17/CFAP157/DNAH3/TUB/CFAP47/DNAH10/HYDIN/DNAH6	2.20039e-23
GO:0044782	cilium organization	20/62	20	CEP126/ZMYND10/ODAD3/CFAP65/CCDC65/CFAP73/CFAP43/ODAD2/DNAAF3/DNAAF1/DNAI1/RSPH4A/SPEF1/RP1/SPAG17/CFAP157/RSPH1/TUB/CFAP47/HYDIN	1.27522e-16
GO:0060271	cilium assembly	19/62	19	CEP126/ZMYND10/ODAD3/CFAP65/CCDC65/CFAP73/CFAP43/ODAD2/DNAAF3/DNAAF1/DNAI1/RSPH4A/SPEF1/RP1/SPAG17/CFAP157/RSPH1/CFAP47/HYDIN	5.96076e-16
GO:0001539	cilium or flagellum-dependent cell motility	13/62	13	ODAD3/CFAP65/CCDC65/CFAP43/ROPN1L/CFAP52/DNAI1/RSPH4A/CFAP157/DNAH3/CFAP47/DNAH10/DNAH6	3.51864e-13
GO:0060285	cilium-dependent cell motility	13/62	13	ODAD3/CFAP65/CCDC65/CFAP43/ROPN1L/CFAP52/DNAI1/RSPH4A/CFAP157/DNAH3/CFAP47/DNAH10/DNAH6	3.51864e-13
GO:0060294	cilium movement involved in cell motility	12/62	12	ODAD3/CFAP65/CFAP43/ROPN1L/CFAP52/DNAI1/RSPH4A/CFAP157/DNAH3/CFAP47/DNAH10/DNAH6	6.92706e-12
GO:0070286	axonemal dynein complex assembly	8/62	8	ZMYND10/ODAD3/CCDC65/CFAP73/ODAD2/DNAAF3/DNAAF1/DNAI1	3.20252e-11
GO:0003351	epithelial cilium movement involved in extracellular fluid movement	8/62	8	ODAD3/NEK10/CFAP43/ROPN1L/DNAAF1/DNAI1/RSPH4A/SPAG17	5.44777e-11
GO:0006858	extracellular transport	8/62	8	ODAD3/NEK10/CFAP43/ROPN1L/DNAAF1/DNAI1/RSPH4A/SPAG17	8.91751e-11
GO:0044458	motile cilium assembly	8/62	8	ZMYND10/CFAP65/CFAP43/DNAAF3/DNAAF1/SPAG17/CFAP157/CFAP47	1.72182e-09
GO:0099111	microtubule-based transport	11/62	11	ODAD3/MAP1A/NEK10/TUBA1A/CFAP43/ROPN1L/DNAAF1/DNAI1/RSPH4A/SPAG17/TUB	3.59095e-09
GO:0030317	flagellated sperm motility	8/62	8	ODAD3/CFAP65/CFAP43/ROPN1L/CFAP52/DNAI1/CFAP157/CFAP47	4.11735e-07
GO:0097722	sperm motility	8/62	8	ODAD3/CFAP65/CFAP43/ROPN1L/CFAP52/DNAI1/CFAP157/CFAP47	4.11735e-07
GO:0036158	outer dynein arm assembly	5/62	5	ZMYND10/ODAD3/ODAD2/DNAAF1/DNAI1	4.11735e-07
GO:0003352	regulation of cilium movement	5/62	5	CCDC65/CFAP43/ODAD2/DNAAF1/RSPH4A	5.78217e-06
GO:0007286	spermatid development	8/62	8	CFAP65/CFAP73/CFAP43/ROPN1L/SPAG17/CFAP157/RSPH1/CFAP47	1.00563e-05
GO:0048515	spermatid differentiation	8/62	8	CFAP65/CFAP73/CFAP43/ROPN1L/SPAG17/CFAP157/RSPH1/CFAP47	1.2762e-05
GO:0060632	regulation of microtubule-based movement	5/62	5	CCDC65/CFAP43/ODAD2/DNAAF1/RSPH4A	2.52309e-05
GO:0007288	sperm axoneme assembly	4/62	4	CFAP65/CFAP43/CFAP157/CFAP47	4.92991e-05
GO:0007368	determination of left/right symmetry	6/62	6	ODAD3/ODAD2/DNAAF3/CFAP52/DNAAF1/DNAI1	0.000112611
GO:0060972	left/right pattern formation	6/62	6	ODAD3/ODAD2/DNAAF3/CFAP52/DNAAF1/DNAI1	0.000139194
GO:0009799	specification of symmetry	6/62	6	ODAD3/ODAD2/DNAAF3/CFAP52/DNAAF1/DNAI1	0.000151255
GO:0009855	determination of bilateral symmetry	6/62	6	ODAD3/ODAD2/DNAAF3/CFAP52/DNAAF1/DNAI1	0.000151255
GO:0120316	sperm flagellum assembly	4/62	4	CFAP65/CFAP43/CFAP157/CFAP47	0.000192432
GO:0032886	regulation of microtubule-based process	7/62	7	MAP1A/CCDC65/CFAP43/ODAD2/DNAAF1/RSPH4A/SPEF1	0.000381433
GO:0007281	germ cell development	8/62	8	CFAP65/CFAP73/CFAP43/ROPN1L/SPAG17/CFAP157/RSPH1/CFAP47	0.000381433
GO:0003356	regulation of cilium beat frequency	3/62	3	CFAP43/ODAD2/DNAAF1	0.000381433
GO:0036159	inner dynein arm assembly	3/62	3	ZMYND10/CFAP73/DNAAF1	0.000381433
GO:0022412	cellular process involved in reproduction in multicellular organism	8/62	8	CFAP65/CFAP73/CFAP43/ROPN1L/SPAG17/CFAP157/RSPH1/CFAP47	0.00244683
GO:0060287	epithelial cilium movement involved in determination of left/right asymmetry	2/62	2	ODAD3/DNAAF1	0.0130487
GO:0098840	protein transport along microtubule	2/62	2	MAP1A/SPAG17	0.0143232
GO:0099118	microtubule-based protein transport	2/62	2	MAP1A/SPAG17	0.0143232
GO:0031109	microtubule polymerization or depolymerization	4/62	4	MAP1A/TPPP3/TUBA1A/SPEF1	0.0145714
GO:0090660	cerebrospinal fluid circulation	2/62	2	ODAD3/CFAP43	0.0156004
GO:1902017	regulation of cilium assembly	3/62	3	ZMYND10/ODAD3/RP1	0.0230534
GO:0010970	transport along microtubule	4/62	4	MAP1A/TUBA1A/SPAG17/TUB	0.0343281
GO:0003002	regionalization	6/62	6	ODAD3/ODAD2/DNAAF3/CFAP52/DNAAF1/DNAI1	0.0376611
GO:0045724	positive regulation of cilium assembly	2/62	2	ZMYND10/RP1	0.0493088

## Sheet: UP_HivLo_GO
ID	Description	GeneRatio	Count	geneID	p.adjust
GO:0050768	negative regulation of neurogenesis	3/15	3	PRTG/NFATC4/GATA2	0.0549775
GO:0051961	negative regulation of nervous system development	3/15	3	PRTG/NFATC4/GATA2	0.0549775

## Sheet: Top100DEG_NormalizedCount
Group	EuE Low	EuE High	EuE Low	EuE High	EuE Low	EuE High
Sample	EuPt1 Low	EuEPt1 High	EuEPt2 Low	EuEPt2 High	EuEPt3 Low	EuEPt3 High
PLCD3	2082.3	863.966	2088.52	776.676	1600.1	1190.64
KMT2C	1491.87	3210.01	1850.84	2958.06	2038.46	3410.56
TUBA1A	5848.18	968.716	4555.03	1518.9	1988.04	810.078
RHOB	1580.59	764.411	1785.93	1071.01	1641.26	889.082
CREB3L2	762.761	1555.66	963.124	1536.62	943.599	1497.75
TPPP3	2320.92	28.568	943.079	161.438	1041.35	333.823
COL6A1	255.953	83.107	986.033	15.7501	96.7266	42.2843
RSPH1	1024.83	154.96	638.583	314.017	486.72	272.622
KCP	92.7958	895.131	64.9083	741.238	294.296	482.931
BASP1P1	414.012	1267.38	688.218	1771.88	675.028	1249.61
DNAAF1	742.367	113.406	509.721	140.766	499.068	288.201
LINC00621	295.723	959.193	527.857	1348.6	535.083	1045.98
SERPINB5	18.3552	3.46279	301.632	14.7657	38.0732	5.56372
C20orf85	668.946	7.79128	381.813	72.8441	234.613	104.598
CFAP43	526.183	86.5698	468.676	137.813	257.252	165.799
CCDC78	577.17	73.5843	266.315	51.1878	327.224	117.951
PLA2R1	105.033	362.727	244.36	534.519	169.786	504.073
HYDIN	600.623	243.261	681.537	356.346	543.315	323.809
PADI2	119.309	12.9855	161.316	23.6251	116.278	22.2549
FAM216B	761.741	10.3884	295.905	76.7817	391.022	142.431
ZMYND10	585.327	25.1052	308.314	57.0941	547.431	104.598
CFAP157	318.157	124.66	351.268	97.4537	204.772	140.206
LRRC46	578.189	44.1506	309.269	96.4693	309.731	164.686
PRTG	209.046	413.803	147.953	470.534	87.4655	312.681
CCDC187	565.953	23.3738	320.723	40.3596	80.2625	75.6666
GATA2	13.2565	94.361	2.8636	48.2346	11.3191	36.7206
TCF7	293.683	108.212	271.087	168.329	268.571	95.696
ADAMTS15	54.0459	492.582	75.4081	1495.27	165.67	201.407
SORBS1	521.084	186.991	602.31	196.876	349.862	140.206
CLIC6	236.578	447.566	144.135	438.049	131.713	485.156
NFATC4	37.7302	353.205	56.3175	150.61	43.2183	129.078
ADH1C	15.296	174.871	16.2271	161.438	13.3771	14.4657
CCDC170	418.091	68.3901	235.77	96.4693	296.354	86.794
RSPH4A	463.979	19.911	215.725	56.1097	234.613	105.711
C9orf24	459.9	6.05988	183.27	16.7345	188.308	82.3431
DNAI1	270.23	6.92558	195.679	20.672	147.148	66.7646
WDR86-AS1	540.459	51.9419	290.178	66.9379	320.021	172.475
DNAH3	328.354	6.92558	187.089	37.4065	126.568	63.4264
DLEC1	294.703	49.3448	154.634	37.4065	276.803	75.6666
GATA2-AS1	15.296	50.2105	1.90907	57.0941	10.2901	45.6225
DNAH6	343.65	20.7767	235.77	92.5318	167.728	73.4411
C5orf49	445.624	14.7169	238.633	74.8129	179.047	45.6225
CFAP65	334.473	6.92558	267.269	34.4533	127.597	44.5098
CCDC65	240.657	86.5698	229.088	102.376	226.381	110.162
DNAAF3	189.671	71.8529	136.498	77.766	227.41	68.9901
ROPN1L	403.815	9.52267	198.543	55.1253	244.903	73.4411
SPAG17	165.197	12.9855	165.134	26.5783	83.3495	53.4117
CFAP52	377.302	18.1796	169.907	32.4846	150.235	79.0048
PRR29	327.335	36.3593	174.68	62.016	183.163	74.5539
CROCC2	158.059	3.46279	138.407	32.4846	185.221	43.397
CFAP47	130.526	6.05988	131.726	23.6251	99.8136	44.5098
SAXO2	236.578	40.6878	176.589	62.016	191.395	93.4705
SPEF1	269.21	31.1651	206.179	68.9066	188.308	96.8087
CFAP73	246.776	14.7169	167.043	41.344	132.742	60.0882
FAM166B	265.131	3.46279	167.998	23.6251	86.4365	43.397
RRAD	486.413	4.32849	206.179	4.9219	105.988	64.5392
CFAP57	243.716	41.5535	164.18	64.9691	145.09	80.1176
C1orf194	336.512	9.52267	95.4533	29.5314	103.93	38.946
AC025594.2	40.7894	180.065	19.0907	77.766	34.9862	90.1323
CEP126	197.828	40.6878	182.316	39.3752	142.003	53.4117
TUBA4B	284.506	3.46279	102.135	30.5158	91.5815	34.4951
TRMT9B	117.269	6.92558	122.18	2.95314	30.8702	25.5931
SLC7A8	14.2763	235.47	57.272	62.016	47.3343	484.044
DNAH10	175.394	43.2849	115.499	47.2503	107.017	62.3137
CCDC69	198.848	19.0453	161.316	37.4065	73.0594	47.848
LRRC10B	221.282	7.79128	152.725	35.4377	135.829	54.5245
GRK3	311.019	46.7477	224.315	86.6255	251.077	85.6813
MAP1A	299.802	12.1198	133.635	21.6564	112.162	46.7353
CAPSL	209.046	3.46279	113.589	33.4689	143.032	32.2696
C11orf70	165.197	39.8221	157.498	62.016	143.032	52.299
CLEC11A	108.092	38.0907	101.181	35.4377	131.713	53.4117
ZBBX	152.96	8.65698	161.316	11.8126	92.6106	45.6225
CFAP77	311.019	5.19419	157.498	21.6564	97.7556	51.1862
FAM81B	210.065	12.1198	139.362	42.3284	76.1465	34.4951
CCDC74A	94.8353	22.5081	106.908	53.1565	156.409	26.7059
TOGARAM2	169.276	4.32849	99.2715	21.6564	50.4213	23.3676
AGBL2	81.5787	9.52267	84.9535	8.85942	44.2473	27.8186
IL5RA	135.625	2.59709	75.4081	13.7813	114.22	30.0441
NEK10	102.993	16.4483	92.5897	23.6251	109.075	41.1715
LRRC71	125.427	12.1198	61.0901	13.7813	113.191	26.7059
C6orf118	148.881	1.7314	80.1808	20.672	88.4945	21.1421
VWA5B2	54.0459	4.32849	45.8176	9.8438	43.2183	4.45098
RP1	150.921	21.6424	93.5443	11.8126	31.8992	17.8039
MORN5	163.157	0.865698	115.499	3.93752	49.3923	16.6912
DPY19L2P2	60.1643	15.5826	127.907	33.4689	87.4655	21.1421
DYNLRB2	168.256	11.2541	84.9535	12.7969	56.5953	20.0294
CCDC151	114.21	8.65698	60.1356	5.90628	59.6824	16.6912
ARMC4	143.783	2.59709	108.817	21.6564	76.1465	23.3676
CFAP99	111.151	9.52267	78.2717	32.4846	55.5663	17.8039
CCDC74B	63.2235	14.7169	55.3629	10.8282	66.8854	22.2549
C1orf158	98.9142	0.865698	36.2723	8.85942	53.5083	15.5784
ADAM19	35.6907	2.59709	137.453	5.90628	4.11602	0
KRT5	22.4342	2.59709	230.042	3.93752	3.08702	1.11274
C11orf97	121.348	2.59709	41.0449	12.7969	34.9862	10.0147
APOBEC4	106.052	0.865698	44.8631	6.89066	31.8992	13.3529
BVES	34.671	80.5099	30.5451	99.4224	20.5801	66.7646
ATP13A4	3.0592	70.9872	15.2725	87.6099	12.3481	47.848
TMEM100	11.2171	64.9273	2.8636	439.034	14.4061	5.56372
ANKUB1	108.092	2.59709	61.0901	6.89066	29.8412	17.8039
WDR49	56.0854	5.19419	37.2268	10.8282	59.6824	13.3529
BMP3	1.01973	43.2849	0	390.799	5.14503	36.7206
GPR162	60.1643	0.865698	62.0447	5.90628	23.6671	12.2402
ELMO1	32.6315	0	70.6355	0.98438	6.17404	1.11274
MROH9	87.6971	0	55.3629	0	2.05801	1.11274
MAGED4	48.9472	1.7314	124.089	1.96876	25.7252	8.90195
C2orf50	55.0656	4.32849	34.3632	13.7813	65.8564	13.3529
ELN-AS1	57.1051	1.7314	20.0452	0.98438	20.5801	5.56372
SRGAP3-AS2	54.0459	1.7314	36.2723	9.8438	68.9434	12.2402
CPA4	11.2171	0.865698	109.771	0	6.17404	3.33823
CCDC144CP	13.2565	51.9419	14.318	50.2034	16.4641	44.5098
MAGEH1	80.559	10.3884	169.907	3.93752	40.1312	17.8039
COL6A2	11.2171	1.7314	139.362	0	3.08702	1.11274
LGR6	39.7696	1.7314	37.2268	0.98438	8.23205	4.45098
TUB	34.671	1.7314	44.8631	4.9219	14.4061	5.56372
SPESP1	2.03947	7.79128	0.954533	95.4849	6.17404	41.1715
LRRC18	18.3552	0	9.54533	0	8.23205	0
TMEM132C	41.8091	0	54.4084	0	9.26106	0
