# Supplementary material for: ALDH1A1+ cells are endometrial progenitors contributing to regeneration and endometriosis
Source: Research Square preprint supplement (doi:10.21203/rs.3.rs-6831916/v1), 2025-07-08
Supplement: Supplementary file 4 [file f3166409cf6339eb0096c527.xlsx]

## Sheet: MouseHIvLO_DEG
gene_name	baseMean	log2FoldChange	lfcSE	stat	pvalue	padj	gene_id	seqid	start	end	gene_type
Ccnb1	354.492	-5.43664	0.29779	-18.2566	1.83318e-74	3.633e-70	ENSMUSG00000041431	chr13	100915158	100923078	protein_coding
Kap	7348.08	-5.40813	0.30038	-18.0043	1.8023e-72	1.78589e-68	ENSMUSG00000032758	chr6	133826814	133830725	protein_coding
Ccnb2	292.795	-5.46564	0.340629	-16.0457	6.1245e-58	4.04585e-54	ENSMUSG00000032218	chr9	70314974	70328829	protein_coding
Ube2c	484.012	-5.09269	0.327446	-15.5528	1.52358e-54	7.54859e-51	ENSMUSG00000001403	chr2	164611818	164620742	protein_coding
Plk1	430.98	-5.65989	0.37593	-15.0557	3.16804e-51	1.25569e-47	ENSMUSG00000030867	chr7	121758662	121769096	protein_coding
Bmp1	4141.22	-1.58061	0.108319	-14.5922	3.1476e-48	1.03965e-44	ENSMUSG00000022098	chr14	70711998	70757674	protein_coding
Top2a	1405.53	-5.01978	0.344823	-14.5576	5.22782e-48	1.48007e-44	ENSMUSG00000020914	chr11	98883769	98915015	protein_coding
Cdc20	524.483	-3.54749	0.245648	-14.4413	2.84256e-47	7.04173e-44	ENSMUSG00000006398	chr4	118290098	118294549	protein_coding
Iqgap3	337.796	-5.58019	0.392264	-14.2256	6.35784e-46	1.4e-42	ENSMUSG00000028068	chr3	87989278	88028355	protein_coding
Kntc1	234.509	-5.32128	0.375713	-14.1631	1.5492e-45	3.07021e-42	ENSMUSG00000029414	chr5	123887779	123959656	protein_coding
Kif11	279.875	-4.86396	0.346859	-14.0229	1.12931e-44	2.03461e-41	ENSMUSG00000012443	chr19	37364851	37410307	protein_coding
Pbk	196.487	-6.16046	0.455277	-13.5312	1.02281e-41	1.68916e-38	ENSMUSG00000022033	chr14	66043286	66055271	protein_coding
Ccna2	357.653	-5.10116	0.379721	-13.434	3.82362e-41	5.82896e-38	ENSMUSG00000027715	chr3	36619014	36626299	protein_coding
Bub1b	311.804	-4.8684	0.374554	-12.9979	1.25829e-38	1.7812e-35	ENSMUSG00000040084	chr2	118428692	118472072	protein_coding
Tpx2	556.657	-3.81363	0.29447	-12.9508	2.32464e-38	3.07131e-35	ENSMUSG00000027469	chr2	152689884	152737241	protein_coding
Nusap1	222.814	-4.01183	0.314946	-12.7381	3.62923e-37	4.49526e-34	ENSMUSG00000027306	chr2	119448779	119481725	protein_coding
Aspm	179.452	-5.69062	0.449427	-12.6619	9.60963e-37	1.12026e-33	ENSMUSG00000033952	chr1	139382510	139421829	protein_coding
Kif4	181.484	-5.11025	0.406817	-12.5615	3.43549e-36	3.78248e-33	ENSMUSG00000034311	chrX	99669343	99770820	protein_coding
Dlgap5	190.277	-4.69847	0.376388	-12.4831	9.23748e-36	9.63518e-33	ENSMUSG00000037544	chr14	47625236	47655864	protein_coding
Kif2c	168.579	-7.31893	0.593119	-12.3397	5.53408e-35	5.48372e-32	ENSMUSG00000028678	chr4	117016836	117039836	protein_coding
Birc5	143.084	-5.14032	0.419406	-12.2562	1.55676e-34	1.46914e-31	ENSMUSG00000017716	chr11	117740077	117746569	protein_coding
Cenpe	292.323	-4.04266	0.330325	-12.2384	1.93782e-34	1.74562e-31	ENSMUSG00000045328	chr3	134918298	134979372	protein_coding
Nt5e	7093.5	2.39955	0.199062	12.0542	1.84203e-33	1.58719e-30	ENSMUSG00000032420	chr9	88209250	88254145	protein_coding
Tm7sf2	512.388	-2.24966	0.187492	-11.9987	3.60979e-33	2.98078e-30	ENSMUSG00000024799	chr19	6112851	6118403	protein_coding
Brca1	257.227	-3.7087	0.311292	-11.9139	1.00196e-32	7.94272e-30	ENSMUSG00000017146	chr11	101379590	101442781	protein_coding
Cd68	1039.3	-2.01446	0.169693	-11.8712	1.67023e-32	1.2731e-29	ENSMUSG00000018774	chr11	69555039	69556979	protein_coding
Prc1	400.087	-2.78622	0.237693	-11.7219	9.84179e-32	7.22387e-29	ENSMUSG00000038943	chr7	79944198	79966007	protein_coding
Racgap1	602.576	-4.11795	0.352397	-11.6855	1.51127e-31	1.06965e-28	ENSMUSG00000023015	chr15	99518377	99549537	protein_coding
AU015791	204.391	-3.12927	0.268198	-11.6677	1.86335e-31	1.27337e-28	ENSMUSG00000113535	chr12	105479639	105481513	lncRNA
Pclaf	249.281	-4.70884	0.404523	-11.6405	2.56603e-31	1.69512e-28	ENSMUSG00000040204	chr9	65797519	65810548	protein_coding
Car2	6871.06	-1.81804	0.157506	-11.5426	8.04146e-31	5.14083e-28	ENSMUSG00000027562	chr3	14951333	14965830	protein_coding
Anln	3139.47	-1.46059	0.127983	-11.4124	3.62492e-30	2.24496e-27	ENSMUSG00000036777	chr9	22243308	22300484	protein_coding
Foxm1	340.348	-3.02607	0.267343	-11.319	1.05625e-29	6.34325e-27	ENSMUSG00000001517	chr6	128339930	128353109	protein_coding
Nek2	213.245	-4.07135	0.360978	-11.2787	1.6725e-29	9.74868e-27	ENSMUSG00000026622	chr1	191553556	191565162	protein_coding
Mcm5	736.087	-2.95349	0.26738	-11.046	2.29079e-28	1.29711e-25	ENSMUSG00000005410	chr8	75836197	75855067	protein_coding
Mki67	1438.92	-6.61254	0.600184	-11.0175	3.14582e-28	1.73178e-25	ENSMUSG00000031004	chr7	135291513	135318090	protein_coding
Kif22	186.624	-3.89455	0.354451	-10.9875	4.38691e-28	2.34972e-25	ENSMUSG00000030677	chr7	126626901	126641643	protein_coding
Rrm2	944.86	-3.66559	0.33402	-10.9742	5.08616e-28	2.65257e-25	ENSMUSG00000020649	chr12	24758240	24764145	protein_coding
Cdca3	214.45	-4.15476	0.381159	-10.9003	1.14818e-27	5.83452e-25	ENSMUSG00000023505	chr6	124806510	124810664	protein_coding
Uhrf1	910.61	-3.06546	0.282406	-10.8548	1.89232e-27	9.14684e-25	ENSMUSG00000001228	chr17	56610321	56630486	protein_coding
Knl1	135.516	-4.23863	0.390445	-10.8559	1.86969e-27	9.14684e-25	ENSMUSG00000027326	chr2	118877600	118935982	protein_coding
Chil4	4505.39	-2.50597	0.232446	-10.7809	4.23867e-27	2.00005e-24	ENSMUSG00000063779	chr3	106108806	106126823	protein_coding
Kif20a	301.649	-3.74743	0.348786	-10.7442	6.30982e-27	2.90809e-24	ENSMUSG00000003779	chr18	34757666	34766330	protein_coding
Ect2	488.231	-2.71579	0.256124	-10.6034	2.87344e-26	1.29422e-23	ENSMUSG00000027699	chr3	27151371	27208027	protein_coding
Spag5	251.01	-3.88733	0.367841	-10.568	4.19408e-26	1.84707e-23	ENSMUSG00000002055	chr11	78192355	78213283	protein_coding
Sprr2a3	1171.3	-3.68003	0.349427	-10.5316	6.17661e-26	2.66105e-23	ENSMUSG00000074445	chr3	92192724	92198712	protein_coding
Mcm10	115.811	-3.42177	0.325415	-10.5151	7.35993e-26	3.10339e-23	ENSMUSG00000026669	chr2	4994525	5017602	protein_coding
Cdca2	195.892	-3.70729	0.356237	-10.4068	2.30852e-25	9.53128e-23	ENSMUSG00000048922	chr14	67913780	67953290	protein_coding
Nuf2	95.86	-5.15918	0.49892	-10.3407	4.61138e-25	1.86507e-22	ENSMUSG00000026683	chr1	169325503	169359033	protein_coding
Gm13230	86.8522	5.7994	0.562218	10.3152	6.01522e-25	2.38419e-22	ENSMUSG00000082082	chr4	145173310	145177458	transcribed_unprocessed_pseudogene
Slfn9	399.015	-3.67484	0.356324	-10.3132	6.14318e-25	2.38717e-22	ENSMUSG00000069793	chr11	82869216	82882656	protein_coding
Espl1	229.115	-8.29381	0.80719	-10.2749	9.142e-25	3.48416e-22	ENSMUSG00000058290	chr15	102204701	102232792	protein_coding
Cdca8	326.3	-2.40093	0.234735	-10.2283	1.48152e-24	5.53976e-22	ENSMUSG00000028873	chr4	124812258	124833104	protein_coding
Cdk1	445.933	-2.89633	0.283259	-10.225	1.53175e-24	5.62153e-22	ENSMUSG00000019942	chr10	69170976	69188768	protein_coding
Fancd2	127.425	-3.70034	0.364304	-10.1573	3.07589e-24	1.10833e-21	ENSMUSG00000034023	chr6	113508643	113573978	protein_coding
Ncaph	461.688	-2.41219	0.23835	-10.1204	4.48655e-24	1.58776e-21	ENSMUSG00000034906	chr2	126945729	126975874	protein_coding
Kif15	117.371	-3.92913	0.389438	-10.0893	6.16386e-24	2.14308e-21	ENSMUSG00000036768	chr9	122780111	122847798	protein_coding
Ttk	95.9048	-5.55632	0.551148	-10.0814	6.67922e-24	2.28222e-21	ENSMUSG00000038379	chr9	83716742	83754442	protein_coding
Aurka	237.732	-3.93406	0.390446	-10.0758	7.06921e-24	2.37454e-21	ENSMUSG00000027496	chr2	172198110	172212455	protein_coding
Bard1	159.222	-2.52493	0.251533	-10.0382	1.03576e-23	3.42111e-21	ENSMUSG00000026196	chr1	71066657	71142305	protein_coding
Rhoj	129.48	5.01238	0.49955	10.0338	1.08282e-23	3.46119e-21	ENSMUSG00000046768	chr12	75355096	75448230	protein_coding
Fam111a	187.928	-4.86988	0.485342	-10.0339	1.08144e-23	3.46119e-21	ENSMUSG00000024691	chr19	12523104	12567132	protein_coding
Nsdhl	1239.17	-1.40035	0.139999	-10.0025	1.48524e-23	4.67213e-21	ENSMUSG00000031349	chrX	71962163	72002120	protein_coding
Prr11	129.801	-3.92866	0.393636	-9.98046	1.85603e-23	5.74732e-21	ENSMUSG00000020493	chr11	86979979	86999534	protein_coding
Rad51	181.065	-3.21537	0.323027	-9.95388	2.42529e-23	7.39453e-21	ENSMUSG00000027323	chr2	118943274	118977926	protein_coding
Ly6c1	1825.56	-2.27822	0.229564	-9.92414	3.26903e-23	9.816e-21	ENSMUSG00000079018	chr15	74915867	74920679	protein_coding
Tacc3	356.891	-2.60934	0.263604	-9.8987	4.21737e-23	1.24746e-20	ENSMUSG00000037313	chr5	33815472	33836339	protein_coding
Ncapd2	787.889	-2.56454	0.261864	-9.79342	1.20166e-22	3.50214e-20	ENSMUSG00000038252	chr6	125144970	125168664	protein_coding
Ncapg	208.832	-3.84639	0.393689	-9.77013	1.51254e-22	4.34428e-20	ENSMUSG00000015880	chr5	45827261	45857888	protein_coding
Fbln1	15786.8	-2.27402	0.233237	-9.74983	1.84785e-22	5.23153e-20	ENSMUSG00000006369	chr15	85090150	85170736	protein_coding
Kifc1	261.632	-2.44769	0.251336	-9.73871	2.06155e-22	5.72224e-20	ENSMUSG00000079553	chr17	34094633	34109635	protein_coding
Kif18b	102.289	-4.55845	0.468116	-9.73786	2.07892e-22	5.72224e-20	ENSMUSG00000051378	chr11	102796355	102815950	protein_coding
Ckap2l	214.675	-4.23643	0.435213	-9.73415	2.15606e-22	5.85327e-20	ENSMUSG00000048327	chr2	129110130	129139132	protein_coding
Pimreg	86.4123	-5.31558	0.551864	-9.63204	5.85535e-22	1.56813e-19	ENSMUSG00000020808	chr11	71932858	71938196	protein_coding
Sipa1	572.98	-1.23299	0.128329	-9.60806	7.39316e-22	1.95357e-19	ENSMUSG00000056917	chr19	5701213	5713735	protein_coding
Mme	446.859	3.75977	0.391873	9.59436	8.444e-22	2.20188e-19	ENSMUSG00000027820	chr3	63148958	63293451	protein_coding
Chaf1a	334.428	-2.76382	0.288497	-9.58005	9.69948e-22	2.49642e-19	ENSMUSG00000002835	chr17	56347439	56379289	protein_coding
Ncapg2	358.274	-2.95069	0.30999	-9.51867	1.75406e-21	4.45667e-19	ENSMUSG00000042029	chr12	116369022	116427351	protein_coding
Atp2c2	6887.37	-1.50186	0.159458	-9.4185	4.57566e-21	1.14785e-18	ENSMUSG00000034112	chr8	120426748	120484456	protein_coding
Cenpa	327.799	-3.12231	0.331805	-9.41009	4.95735e-21	1.22806e-18	ENSMUSG00000029177	chr5	30824121	30832174	protein_coding
Mcm6	1067.43	-1.86986	0.20051	-9.32553	1.10432e-20	2.70191e-18	ENSMUSG00000026355	chr1	128259327	128287401	protein_coding
Tk1	374.793	-2.31908	0.250658	-9.25195	2.20424e-20	5.32727e-18	ENSMUSG00000025574	chr11	117706352	117716918	protein_coding
Hspb8	69.8884	4.6896	0.507477	9.24101	2.44181e-20	5.83033e-18	ENSMUSG00000041548	chr5	116546550	116560923	protein_coding
Knstrn	304.814	-2.39316	0.259236	-9.23158	2.6668e-20	6.29175e-18	ENSMUSG00000027331	chr2	118644484	118684438	protein_coding
Exo1	87.6609	-3.83302	0.416223	-9.20905	3.29038e-20	7.67163e-18	ENSMUSG00000039748	chr1	175708147	175741055	protein_coding
Asf1b	146.865	-3.69358	0.401778	-9.19306	3.81811e-20	8.79852e-18	ENSMUSG00000005470	chr8	84682136	84696826	protein_coding
Shcbp1	78.6039	-4.59731	0.50052	-9.18506	4.11282e-20	9.36872e-18	ENSMUSG00000022322	chr8	4785976	4829567	protein_coding
Ankle1	80.3413	-7.25249	0.793341	-9.1417	6.14788e-20	1.38453e-17	ENSMUSG00000046295	chr8	71858654	71862548	protein_coding
Esco2	81.0256	-5.23807	0.57596	-9.0945	9.50203e-20	2.11586e-17	ENSMUSG00000022034	chr14	66056487	66071443	protein_coding
Mcm3	936.802	-2.06987	0.227904	-9.08219	1.06409e-19	2.34313e-17	ENSMUSG00000041859	chr1	20873192	20890536	protein_coding
Fer1l4	889.483	-1.87025	0.206315	-9.06504	1.24564e-19	2.71275e-17	ENSMUSG00000013338	chr2	155861059	155894867	protein_coding
Pif1	64.3954	-6.6825	0.738977	-9.0429	1.52569e-19	3.28653e-17	ENSMUSG00000041064	chr9	65494442	65503249	protein_coding
Spc24	90.3555	-3.8309	0.425167	-9.01035	2.05409e-19	4.3772e-17	ENSMUSG00000074476	chr9	21666738	21671599	protein_coding
Pold1	572.821	-1.6654	0.184997	-9.00232	2.21007e-19	4.65948e-17	ENSMUSG00000038644	chr7	44182170	44198273	protein_coding
Kif23	514.301	-2.49989	0.278405	-8.97932	2.72437e-19	5.68331e-17	ENSMUSG00000032254	chr9	61823187	61854056	protein_coding
Cdc6	209.307	-3.65562	0.410369	-8.90815	5.18917e-19	1.07124e-16	ENSMUSG00000017499	chr11	98798627	98814766	protein_coding
Ccnd2	1941.3	2.2183	0.249719	8.88319	6.49725e-19	1.31718e-16	ENSMUSG00000000184	chr6	127102125	127129156	protein_coding
Nlgn2	1400.75	-1.14789	0.129224	-8.88291	6.51348e-19	1.31718e-16	ENSMUSG00000051790	chr11	69713948	69728610	protein_coding
Stil	181.658	-2.11238	0.23884	-8.8443	9.21015e-19	1.8437e-16	ENSMUSG00000028718	chr4	114857356	114900393	protein_coding
Cdkn2c	139.574	-2.72705	0.309431	-8.81311	1.21726e-18	2.41236e-16	ENSMUSG00000028551	chr4	109518073	109524386	protein_coding
Fanci	53.8227	-3.5022	0.397726	-8.80556	1.30202e-18	2.5548e-16	ENSMUSG00000039187	chr7	79041677	79100012	protein_coding
Ccnf	305.089	-2.69207	0.306556	-8.78165	1.61096e-18	3.13001e-16	ENSMUSG00000072082	chr17	24441172	24470458	protein_coding
Chn1os3	591.352	-1.67144	0.192353	-8.68941	3.64324e-18	7.00988e-16	ENSMUSG00000086544	chr2	73426870	73446356	lncRNA
Slc26a1	322.796	-3.11346	0.358713	-8.67952	3.97445e-18	7.57363e-16	ENSMUSG00000046959	chr5	108817744	108823435	protein_coding
Cdc45	116.589	-2.72317	0.314783	-8.65092	5.10837e-18	9.64168e-16	ENSMUSG00000000028	chr16	18599197	18630737	protein_coding
Smoc1	45.15	9.03664	1.04577	8.64114	5.56529e-18	1.0405e-15	ENSMUSG00000021136	chr12	81073582	81233188	protein_coding
Cyp51	3300.43	-1.33183	0.154443	-8.62348	6.49485e-18	1.20294e-15	ENSMUSG00000001467	chr5	4131145	4154746	protein_coding
Spink8	433.222	-3.14618	0.365312	-8.61232	7.15966e-18	1.3138e-15	ENSMUSG00000050074	chr9	109641348	109655701	protein_coding
Neil3	53.8238	-6.01377	0.698373	-8.61111	7.23541e-18	1.31552e-15	ENSMUSG00000039396	chr8	54039902	54092100	protein_coding
Kirrel3	119.293	-3.22557	0.375129	-8.59855	8.07307e-18	1.45447e-15	ENSMUSG00000032036	chr9	34397190	34948012	protein_coding
Troap	60.0763	-5.97893	0.695512	-8.59644	8.22264e-18	1.46807e-15	ENSMUSG00000032783	chr15	98972456	98981290	protein_coding
Hrob	52.6647	-6.38715	0.745048	-8.5728	1.00996e-17	1.78709e-15	ENSMUSG00000034773	chr11	102139708	102156013	protein_coding
Lig1	723.591	-1.98574	0.232605	-8.53697	1.37784e-17	2.41646e-15	ENSMUSG00000056394	chr7	13011239	13045350	protein_coding
Fanca	298.37	-2.6611	0.311769	-8.53548	1.39579e-17	2.42647e-15	ENSMUSG00000032815	chr8	123995039	124045315	protein_coding
Sapcd2	75.4172	-5.04128	0.597119	-8.44268	3.1015e-17	5.34483e-15	ENSMUSG00000026955	chr2	25262333	25268225	protein_coding
Pinlyp	147.127	-4.2224	0.502575	-8.40155	4.40634e-17	7.52801e-15	ENSMUSG00000011632	chr7	24241083	24245543	protein_coding
Omp	1080.77	-1.76485	0.210161	-8.3976	4.55701e-17	7.71888e-15	ENSMUSG00000074006	chr7	97792566	97794709	protein_coding
Ticrr	120.859	-4.12505	0.4929	-8.36895	5.81317e-17	9.76317e-15	ENSMUSG00000046591	chr7	79309944	79347896	protein_coding
Fam83e	584.17	-2.83834	0.341196	-8.31879	8.88658e-17	1.47995e-14	ENSMUSG00000054161	chr7	45370636	45378916	protein_coding
Mab21l3	1674.59	-1.1091	0.133381	-8.31528	9.15331e-17	1.51167e-14	ENSMUSG00000044313	chr3	101720392	101756275	protein_coding
Smc2	500.775	-1.60906	0.194052	-8.29194	1.11421e-16	1.82491e-14	ENSMUSG00000028312	chr4	52439243	52488260	protein_coding
Grb10	4334	1.55058	0.187293	8.27893	1.24289e-16	2.01899e-14	ENSMUSG00000020176	chr11	11880508	11988683	protein_coding
Niban1	2653.92	2.227	0.269074	8.27652	1.2683e-16	2.0435e-14	ENSMUSG00000026483	chr1	151446937	151597690	protein_coding
Rad54l	103.015	-3.79735	0.459635	-8.26166	1.43662e-16	2.29604e-14	ENSMUSG00000028702	chr4	115951461	115980887	protein_coding
Tcea1	1577.1	1.04819	0.127047	8.25041	1.57848e-16	2.50259e-14	ENSMUSG00000033813	chr1	4928037	4968132	protein_coding
Ccne1	231.821	-2.26902	0.27575	-8.22856	1.89482e-16	2.98028e-14	ENSMUSG00000002068	chr7	37797409	37806959	protein_coding
Rars	5439.8	1.36171	0.165924	8.20678	2.2719e-16	3.54524e-14	ENSMUSG00000018848	chr11	35699208	35725333	protein_coding
Polq	56.8669	-4.38208	0.534147	-8.20388	2.32749e-16	3.6036e-14	ENSMUSG00000034206	chr16	36832148	36915779	protein_coding
Ndc80	114.006	-4.01303	0.489397	-8.19993	2.40523e-16	3.6951e-14	ENSMUSG00000024056	chr17	71803095	71833852	protein_coding
Kif20b	209.179	-2.47939	0.302448	-8.19774	2.44939e-16	3.734e-14	ENSMUSG00000024795	chr19	34899761	34953145	protein_coding
Fdps	3441.73	-1.57617	0.192413	-8.19157	2.57836e-16	3.87662e-14	ENSMUSG00000059743	chr3	89000895	89009266	protein_coding
Chtf18	117.371	-3.3675	0.411101	-8.1914	2.58207e-16	3.87662e-14	ENSMUSG00000019214	chr17	25937900	25946393	protein_coding
Fignl1	188.555	-3.11533	0.38044	-8.18876	2.63938e-16	3.91462e-14	ENSMUSG00000035455	chr11	11737431	11758962	protein_coding
Aurkb	263.954	-6.24637	0.76283	-8.18842	2.64688e-16	3.91462e-14	ENSMUSG00000020897	chr11	68936473	68942490	protein_coding
Gstm7	381.985	-2.53792	0.310679	-8.16894	3.11103e-16	4.56699e-14	ENSMUSG00000004035	chr3	107833650	107839133	protein_coding
Slc39a2	443.47	-3.14248	0.385168	-8.15873	3.38566e-16	4.9336e-14	ENSMUSG00000072572	chr14	52130346	52134202	protein_coding
Slc35e2	2417.11	-1.49132	0.183196	-8.1406	3.93336e-16	5.68987e-14	ENSMUSG00000042202	chr4	155685873	155707797	protein_coding
Mgll	1087.01	-2.65199	0.326343	-8.1264	4.42225e-16	6.35074e-14	ENSMUSG00000033174	chr6	88701394	88805342	protein_coding
Gpsm2	577.95	-1.30174	0.160766	-8.09712	5.62754e-16	8.0235e-14	ENSMUSG00000027883	chr3	108585954	108629625	protein_coding
Elf5	766.18	-1.50423	0.185913	-8.09105	5.91516e-16	8.37333e-14	ENSMUSG00000027186	chr2	103242033	103281334	protein_coding
Rrm1	1702.45	-1.64428	0.203404	-8.08381	6.2775e-16	8.82323e-14	ENSMUSG00000030978	chr7	102090902	102118978	protein_coding
Hspa9	17872.3	1.11121	0.137615	8.07484	6.75668e-16	9.42985e-14	ENSMUSG00000024359	chr18	35070467	35087410	protein_coding
Cdh24	501.93	-1.3378	0.16623	-8.04789	8.42309e-16	1.16557e-13	ENSMUSG00000059674	chr14	54868688	54878821	protein_coding
Mis18bp1	107.087	-2.66082	0.330686	-8.04638	8.52801e-16	1.16557e-13	ENSMUSG00000047534	chr12	65179508	65219378	protein_coding
Ska1	28.3755	-8.2116	1.02048	-8.04679	8.49939e-16	1.16557e-13	ENSMUSG00000036223	chr18	74328370	74340889	protein_coding
Cdc25c	52.5041	-6.16527	0.773899	-7.9665	1.63234e-15	2.21573e-13	ENSMUSG00000044201	chr18	34866046	34884586	protein_coding
Rad51ap1	63.4542	-3.94774	0.496793	-7.94645	1.91932e-15	2.58756e-13	ENSMUSG00000030346	chr6	126900013	126916550	protein_coding
Tcf19	154.997	-2.94674	0.371901	-7.92346	2.31e-15	3.09322e-13	ENSMUSG00000050410	chr17	35823631	35827721	protein_coding
Herpud1	2578.27	1.24677	0.157485	7.91675	2.43798e-15	3.24268e-13	ENSMUSG00000031770	chr8	95113066	95122005	protein_coding
Crebrf	1070	1.45069	0.183548	7.9036	2.70963e-15	3.57996e-13	ENSMUSG00000048249	chr17	26934624	26995609	protein_coding
Gale	1414.3	-1.49893	0.190181	-7.8816	3.23215e-15	4.21412e-13	ENSMUSG00000028671	chr4	135691038	135695489	protein_coding
Cdhr2	183.15	-2.64034	0.336553	-7.84525	4.32108e-15	5.56073e-13	ENSMUSG00000034918	chr13	54849274	54884475	protein_coding
Zwilch	144.787	-2.34776	0.300784	-7.80547	5.92779e-15	7.57916e-13	ENSMUSG00000032400	chr9	64044426	64080386	protein_coding
Hoxb9	308.987	3.35199	0.429663	7.80145	6.12008e-15	7.77485e-13	ENSMUSG00000020875	chr11	96162283	96167421	protein_coding
Adgre5	2392.69	-1.08085	0.138703	-7.79254	6.56745e-15	8.29005e-13	ENSMUSG00000002885	chr8	84449880	84467955	protein_coding
Plch2	1112.76	-1.24156	0.15983	-7.76802	7.97243e-15	9.99896e-13	ENSMUSG00000029055	chr4	155067572	155141241	protein_coding
Oip5	46.8071	-3.22819	0.415616	-7.76723	8.02217e-15	9.99896e-13	ENSMUSG00000072980	chr2	119439993	119448950	protein_coding
Kazn	7785.02	-1.40185	0.180548	-7.7644	8.20294e-15	1.00973e-12	ENSMUSG00000040606	chr4	141829701	142205056	protein_coding
Prap1	15087.5	-2.26542	0.291758	-7.76474	8.18128e-15	1.00973e-12	ENSMUSG00000025467	chr7	139673308	139677113	protein_coding
Sphkap	239.186	-3.44512	0.44722	-7.7034	1.32491e-14	1.62081e-12	ENSMUSG00000026163	chr1	83231860	83385921	protein_coding
ENSMUSG00000120992	6665.96	-2.11859	0.275535	-7.68899	1.48307e-14	1.80316e-12	ENSMUSG00000120992	chr17	35215654	35219393	lncRNA
Ercc6l	124.313	-3.24441	0.422544	-7.67827	1.61254e-14	1.94861e-12	ENSMUSG00000051220	chrX	101185322	101200697	protein_coding
Prl6a1	478.022	-1.65587	0.216373	-7.65286	1.96553e-14	2.36078e-12	ENSMUSG00000069259	chr13	27496610	27503235	protein_coding
Tspan1	5846.38	-1.40042	0.183099	-7.64845	2.03412e-14	2.42844e-12	ENSMUSG00000028699	chr4	116019066	116024798	protein_coding
Wdr90	561.289	-1.52778	0.1999	-7.64273	2.12666e-14	2.52373e-12	ENSMUSG00000073434	chr17	26063745	26080475	protein_coding
Timeless	212.919	-2.35063	0.307985	-7.6323	2.30608e-14	2.72035e-12	ENSMUSG00000039994	chr10	128067934	128088810	protein_coding
Xlr3b	33.0963	8.58876	1.12686	7.62185	2.50069e-14	2.91522e-12	ENSMUSG00000073125	chrX	72235813	72246536	protein_coding
Gm7694	765.831	-1.31547	0.172589	-7.62198	2.49805e-14	2.91522e-12	ENSMUSG00000102752	chr1	170125768	170133901	protein_coding
A530020G20Rik	613.723	-1.01351	0.13301	-7.6198	2.54071e-14	2.94455e-12	ENSMUSG00000097124	chr3	121325268	121329855	lncRNA
Gas6	112.788	2.74651	0.3611	7.60595	2.82818e-14	3.25865e-12	ENSMUSG00000031451	chr8	13515374	13544490	protein_coding
Tceal8	119.399	3.9941	0.525338	7.60291	2.89546e-14	3.31689e-12	ENSMUSG00000051579	chrX	135069733	135073091	protein_coding
Pik3r3	1843.11	-1.35084	0.177776	-7.59859	2.99386e-14	3.4099e-12	ENSMUSG00000028698	chr4	116078815	116160253	protein_coding
Dtl	216.205	-2.6986	0.355221	-7.59695	3.03195e-14	3.43356e-12	ENSMUSG00000037474	chr1	191269468	191307656	protein_coding
Sgo2a	54.616	-4.25313	0.560277	-7.59112	3.17156e-14	3.57124e-12	ENSMUSG00000026039	chr1	58035130	58065058	protein_coding
Mst1r	285.591	-1.2672	0.167496	-7.56553	3.86277e-14	4.32499e-12	ENSMUSG00000032584	chr9	107784072	107797582	protein_coding
Tmem35b	684.331	-1.16149	0.153955	-7.54436	4.5452e-14	5.06049e-12	ENSMUSG00000070737	chr4	127017484	127023437	protein_coding
Tedc1	511.186	-1.05998	0.140566	-7.54078	4.67151e-14	5.14333e-12	ENSMUSG00000037466	chr12	113120041	113129668	protein_coding
Egfl6	2227.41	-1.77481	0.235526	-7.53553	4.8635e-14	5.32513e-12	ENSMUSG00000000402	chrX	165306003	165368716	protein_coding
Wars1	4822.12	1.06159	0.141809	7.48604	7.09839e-14	7.72945e-12	ENSMUSG00000021266	chr12	108825956	108860100	protein_coding
Idi1	856.743	-1.3907	0.186051	-7.47486	7.72883e-14	8.36995e-12	ENSMUSG00000058258	chr13	8935537	8942487	protein_coding
Mvd	1004.38	-1.59294	0.213621	-7.45688	8.85966e-14	9.43982e-12	ENSMUSG00000006517	chr8	123160340	123170161	protein_coding
Arhgap19	280.856	-1.66837	0.223726	-7.45723	8.83598e-14	9.43982e-12	ENSMUSG00000025154	chr19	41755027	41790486	protein_coding
Ret	223.61	-3.55259	0.479319	-7.41175	1.24648e-13	1.321e-11	ENSMUSG00000030110	chr6	118128706	118174679	protein_coding
Nck1	1205.46	1.01629	0.137212	7.40674	1.29441e-13	1.35891e-11	ENSMUSG00000032475	chr9	100374346	100428187	protein_coding
Elovl6	592.639	-1.12064	0.151303	-7.40658	1.29597e-13	1.35891e-11	ENSMUSG00000041220	chr3	129326004	129432144	protein_coding
Notch3	877.229	-1.72857	0.234052	-7.3854	1.51992e-13	1.57706e-11	ENSMUSG00000038146	chr17	32339794	32385826	protein_coding
Rora	171.915	2.41297	0.327113	7.37659	1.62397e-13	1.67624e-11	ENSMUSG00000032238	chr9	68561068	69295528	protein_coding
Fut2	1927.9	-2.08112	0.282535	-7.36589	1.75969e-13	1.80692e-11	ENSMUSG00000055978	chr7	45298015	45315818	protein_coding
Nt5dc2	267.527	-1.89433	0.257775	-7.34879	2.00015e-13	2.04325e-11	ENSMUSG00000071547	chr14	30853010	30861081	protein_coding
Npr3	25.7069	22.2277	3.02758	7.34173	2.1085e-13	2.14289e-11	ENSMUSG00000022206	chr15	11839982	11907373	protein_coding
Arl14ep	1661.83	1.36133	0.185718	7.33008	2.30022e-13	2.32581e-11	ENSMUSG00000027122	chr2	106792872	106804769	protein_coding
E2f1	212.369	-2.2038	0.301072	-7.31986	2.48238e-13	2.49725e-11	ENSMUSG00000027490	chr2	154401327	154411812	protein_coding
Hells	405.805	-1.74571	0.238605	-7.31631	2.54879e-13	2.55111e-11	ENSMUSG00000025001	chr19	38919359	38959495	protein_coding
Dscc1	18.2852	-7.57856	1.03652	-7.31151	2.64165e-13	2.63077e-11	ENSMUSG00000022422	chr15	54939495	54953887	protein_coding
Fbxl19	1943.6	-1.0429	0.142674	-7.30968	2.67787e-13	2.6535e-11	ENSMUSG00000030811	chr7	127343715	127368655	protein_coding
Pole	379.41	-1.7417	0.23894	-7.28926	3.11659e-13	3.05765e-11	ENSMUSG00000007080	chr5	110434172	110485340	protein_coding
Lrp8	456.781	-1.50509	0.206689	-7.2819	3.29143e-13	3.21328e-11	ENSMUSG00000028613	chr4	107659066	107734037	protein_coding
Cenph	81.2564	-2.23933	0.307554	-7.28108	3.31164e-13	3.21716e-11	ENSMUSG00000045273	chr13	100896182	100912407	protein_coding
Tbc1d9	739.807	2.22433	0.305687	7.27651	3.42576e-13	3.31179e-11	ENSMUSG00000031709	chr8	83891981	83999563	protein_coding
BC055324	129.454	-1.58363	0.218091	-7.26132	3.83326e-13	3.66993e-11	ENSMUSG00000041406	chr1	163773562	163822365	protein_coding
Pkmyt1	262.577	-1.62821	0.224701	-7.24613	4.28846e-13	4.086e-11	ENSMUSG00000023908	chr17	23945310	23955709	protein_coding
Gulo	113.307	2.22826	0.307663	7.24253	4.40395e-13	4.15607e-11	ENSMUSG00000034450	chr14	66224235	66246656	protein_coding
Cdt1	373.95	-1.54907	0.213872	-7.24297	4.38958e-13	4.15607e-11	ENSMUSG00000006585	chr8	123294754	123300293	protein_coding
Col4a3	98.1181	2.86243	0.395439	7.23863	4.53244e-13	4.25706e-11	ENSMUSG00000079465	chr1	82564642	82699780	protein_coding
Ghitm	10091	1.13712	0.157265	7.23061	4.80816e-13	4.49472e-11	ENSMUSG00000041028	chr14	36842049	36857229	protein_coding
Serpinb9b	621.413	2.63824	0.364989	7.22829	4.89101e-13	4.50837e-11	ENSMUSG00000021403	chr13	33211399	33225867	protein_coding
Spc25	171.351	-2.31727	0.320569	-7.22861	4.87964e-13	4.50837e-11	ENSMUSG00000005233	chr2	69024239	69036538	protein_coding
Sgo1	84.2399	-3.98846	0.551715	-7.22919	4.85882e-13	4.50837e-11	ENSMUSG00000023940	chr17	53981814	53996361	protein_coding
Sgsm1	2194.5	-1.60541	0.222611	-7.21171	5.52531e-13	5.06947e-11	ENSMUSG00000042216	chr5	113391086	113458652	protein_coding
Papss2	278.066	-2.24222	0.311343	-7.20179	5.94272e-13	5.42732e-11	ENSMUSG00000024899	chr19	32573190	32644587	protein_coding
Cacng8	18.4212	-7.58918	1.05614	-7.1858	6.68167e-13	6.07419e-11	ENSMUSG00000053395	chr7	3439199	3464164	protein_coding
Mcm4	1192	-1.56963	0.218643	-7.17897	7.02404e-13	6.35627e-11	ENSMUSG00000022673	chr16	15441761	15455264	protein_coding
Slc16a3	1290.93	-2.41651	0.337024	-7.17013	7.49275e-13	6.7496e-11	ENSMUSG00000025161	chr11	120839306	120851694	protein_coding
Castor2	1403.24	-1.38185	0.19379	-7.13063	9.99111e-13	8.95945e-11	ENSMUSG00000015944	chr5	134128550	134173182	protein_coding
Ucp2	13878.7	-1.59472	0.223761	-7.12692	1.02636e-12	9.16236e-11	ENSMUSG00000033685	chr7	100142544	100151227	protein_coding
Brip1	110.094	-2.6312	0.369932	-7.11265	1.13837e-12	1.01167e-10	ENSMUSG00000034329	chr11	85948964	86092019	protein_coding
Nr1d2	1322.97	1.1323	0.159466	7.10055	1.24261e-12	1.09937e-10	ENSMUSG00000021775	chr14	4230569	4265642	protein_coding
Mov10	980.811	-1.24996	0.176458	-7.08364	1.4042e-12	1.23682e-10	ENSMUSG00000002227	chr3	104702152	104725879	protein_coding
Dhcr24	36833.2	-1.25136	0.17705	-7.06781	1.57403e-12	1.38027e-10	ENSMUSG00000034926	chr4	106418235	106446310	protein_coding
Cxcl1	627.199	1.37818	0.195131	7.06282	1.63156e-12	1.42442e-10	ENSMUSG00000029380	chr5	91039100	91040974	protein_coding
Pola2	396.684	-1.44733	0.20524	-7.05193	1.76459e-12	1.5271e-10	ENSMUSG00000024833	chr19	5990570	6014230	protein_coding
Dna2	137.537	-2.2337	0.316734	-7.0523	1.75978e-12	1.5271e-10	ENSMUSG00000036875	chr10	62782805	62809964	protein_coding
Isyna1	18541.4	-2.22257	0.315323	-7.04855	1.80788e-12	1.55776e-10	ENSMUSG00000019139	chr8	71047023	71049940	protein_coding
Mybl2	134.318	-2.23279	0.317233	-7.03833	1.94553e-12	1.66192e-10	ENSMUSG00000017861	chr2	162896607	162926608	protein_coding
Scd1	2143.7	-1.65311	0.235166	-7.02954	2.07216e-12	1.76249e-10	ENSMUSG00000037071	chr19	44382894	44396318	protein_coding
Cacna1h	67.8491	3.84051	0.546632	7.02577	2.12889e-12	1.80301e-10	ENSMUSG00000024112	chr17	25593259	25652757	protein_coding
Cchcr1	544.912	-1.01088	0.14415	-7.0127	2.33757e-12	1.97132e-10	ENSMUSG00000040312	chr17	35827997	35841912	protein_coding
Fut8	1876.42	-1.3618	0.194404	-7.00499	2.47009e-12	2.07425e-10	ENSMUSG00000021065	chr12	77284899	77523112	protein_coding
Cip2a	233.379	-1.93916	0.277012	-7.00026	2.55481e-12	2.13634e-10	ENSMUSG00000033031	chr16	48814548	48840072	protein_coding
Abca7	1148.07	-1.52957	0.219553	-6.96676	3.24333e-12	2.68939e-10	ENSMUSG00000035722	chr10	79832328	79851406	protein_coding
Cdca5	159.42	-2.05662	0.295924	-6.94982	3.65743e-12	3.02012e-10	ENSMUSG00000024791	chr19	6135013	6141807	protein_coding
Atad2	493.107	-1.67996	0.24267	-6.92281	4.42778e-12	3.64107e-10	ENSMUSG00000022360	chr15	57957440	57998478	protein_coding
Lrrc45	1280.22	-1.17285	0.169499	-6.91949	4.53262e-12	3.71188e-10	ENSMUSG00000025145	chr11	120604751	120611954	protein_coding
Parpbp	61.1493	-2.49548	0.36068	-6.91881	4.55459e-12	3.71452e-10	ENSMUSG00000035365	chr10	87927294	87982803	protein_coding
Haspin	140.47	-1.87023	0.271091	-6.8989	5.2407e-12	4.25657e-10	ENSMUSG00000050107	chr11	73026311	73029120	protein_coding
Mctp1	120.938	1.89762	0.275272	6.89363	5.43861e-12	4.39928e-10	ENSMUSG00000021596	chr13	76532259	77179929	protein_coding
Myb	407.045	-2.48431	0.362597	-6.85144	7.31101e-12	5.88982e-10	ENSMUSG00000019982	chr10	21000834	21036883	protein_coding
Hmgcs1	2573.91	-1.13297	0.165937	-6.82773	8.62693e-12	6.9218e-10	ENSMUSG00000093930	chr13	120151915	120169796	protein_coding
Ckap2	205.616	-2.14171	0.31411	-6.81835	9.20912e-12	7.35913e-10	ENSMUSG00000037725	chr8	22658176	22675835	protein_coding
Nsl1	55.2702	-3.32847	0.489358	-6.8017	1.03391e-11	8.22891e-10	ENSMUSG00000062510	chr1	190795209	190818671	protein_coding
Upk3b	130.796	1.71506	0.252648	6.78832	1.13449e-11	8.95752e-10	ENSMUSG00000042985	chr5	136067350	136075341	protein_coding
Ska3	76.6356	-3.45083	0.509952	-6.76697	1.31506e-11	1.03011e-09	ENSMUSG00000021965	chr14	58044018	58063642	protein_coding
Suox	180.404	-1.30874	0.193477	-6.76432	1.33937e-11	1.04093e-09	ENSMUSG00000049858	chr10	128505763	128509942	protein_coding
Neurl1b	65.8097	-3.31551	0.490624	-6.75776	1.40145e-11	1.08492e-09	ENSMUSG00000034413	chr17	26633803	26665323	protein_coding
Arhgef39	87.8092	-2.68379	0.397692	-6.7484	1.49485e-11	1.15272e-09	ENSMUSG00000051517	chr4	43496142	43499695	protein_coding
Fcna	1224.1	-3.21985	0.477417	-6.74432	1.53744e-11	1.18097e-09	ENSMUSG00000026938	chr2	25514678	25518042	protein_coding
Iah1	940.161	1.17021	0.173601	6.74077	1.57552e-11	1.20555e-09	ENSMUSG00000062054	chr12	21366390	21373820	protein_coding
9130230L23Rik	517.292	-1.70269	0.252716	-6.73757	1.61057e-11	1.22763e-09	ENSMUSG00000054598	chr5	66136701	66161628	lncRNA
Gm12840	28.3185	3.90896	0.584205	6.69107	2.21551e-11	1.66314e-09	ENSMUSG00000086320	chr4	117557385	117558120	lncRNA
Rhoq	1272.37	1.08679	0.163238	6.65765	2.78231e-11	2.08075e-09	ENSMUSG00000024143	chr17	87270510	87307497	protein_coding
Alox15	337.402	-1.97947	0.29765	-6.65034	2.92413e-11	2.17859e-09	ENSMUSG00000018924	chr11	70234978	70242857	protein_coding
Jun	621.131	1.42738	0.214698	6.64835	2.96402e-11	2.20004e-09	ENSMUSG00000052684	chr4	94937271	94940459	protein_coding
Pcyt2	1304.05	-1.04645	0.157513	-6.64353	3.06251e-11	2.26466e-09	ENSMUSG00000025137	chr11	120500913	120508762	protein_coding
Arhgap11a	560.801	-1.69044	0.254901	-6.63174	3.31746e-11	2.42495e-09	ENSMUSG00000041219	chr2	113661837	113679006	protein_coding
Alox12	188.749	-3.09632	0.466927	-6.63127	3.32822e-11	2.42495e-09	ENSMUSG00000000320	chr11	70132283	70146179	protein_coding
Ints1	2505.57	-1.12317	0.169408	-6.62996	3.35783e-11	2.43756e-09	ENSMUSG00000029547	chr5	139737037	139761429	protein_coding
Acat2	1260.8	-1.355	0.204633	-6.62161	3.55317e-11	2.5606e-09	ENSMUSG00000023832	chr17	13161777	13179634	protein_coding
Dnmt1	1825.56	-1.42747	0.215936	-6.61061	3.82749e-11	2.73838e-09	ENSMUSG00000004099	chr9	20818505	20871184	protein_coding
Cenpm	54.2401	-4.47929	0.679579	-6.59126	4.36101e-11	3.0929e-09	ENSMUSG00000068101	chr15	82117980	82128949	protein_coding
Pcx	1109.66	-1.46792	0.222873	-6.58636	4.5075e-11	3.17899e-09	ENSMUSG00000024892	chr19	4560500	4671780	protein_coding
Lmntd2	302.278	-1.57935	0.240034	-6.57969	4.71424e-11	3.31301e-09	ENSMUSG00000025500	chr7	140789905	140793993	protein_coding
Sqle	2213.96	-1.22348	0.186849	-6.54797	5.83248e-11	4.07e-09	ENSMUSG00000022351	chr15	59186926	59203041	protein_coding
Gm20541	13.852	7.3298	1.12102	6.53853	6.21249e-11	4.31997e-09	ENSMUSG00000092390	chr17	38320538	38323287	unprocessed_pseudogene
Vmn1r51	12.8208	7.22059	1.10916	6.50998	7.51591e-11	5.18991e-09	ENSMUSG00000062818	chr6	90099578	90109246	protein_coding
Pik3r5	203.936	-1.64565	0.252894	-6.50727	7.6529e-11	5.26615e-09	ENSMUSG00000020901	chr11	68322947	68388675	protein_coding
Btn1a1	576.688	2.4739	0.380294	6.50524	7.75719e-11	5.31945e-09	ENSMUSG00000000706	chr13	23641162	23650071	protein_coding
Ddit3	369.182	1.83419	0.282229	6.49895	8.0883e-11	5.52738e-09	ENSMUSG00000025408	chr10	127126643	127132157	protein_coding
Klf9	869.308	1.44506	0.222834	6.48492	8.87818e-11	6.02561e-09	ENSMUSG00000033863	chr19	23118590	23145498	protein_coding
Dennd2a	1631.96	-1.49408	0.230688	-6.4766	9.38102e-11	6.32357e-09	ENSMUSG00000038456	chr6	39439312	39534801	protein_coding
Ptms	3571	-1.12956	0.174773	-6.463	1.02647e-10	6.89578e-09	ENSMUSG00000030122	chr6	124890644	124897066	protein_coding
Clspn	170.268	-5.99783	0.929212	-6.45475	1.08398e-10	7.25756e-09	ENSMUSG00000042489	chr4	126450728	126487696	protein_coding
Wdhd1	142.044	-2.04487	0.316926	-6.45222	1.10226e-10	7.35509e-09	ENSMUSG00000037572	chr14	47478401	47514314	protein_coding
Steap3	269.043	-1.68177	0.261295	-6.43628	1.2244e-10	8.12549e-09	ENSMUSG00000026389	chr1	120118487	120200435	protein_coding
Sdk1	35.2081	-4.16011	0.647101	-6.42884	1.28581e-10	8.46586e-09	ENSMUSG00000039683	chr5	141227245	142201341	protein_coding
Pask	365.96	-1.07289	0.166951	-6.42639	1.30668e-10	8.57478e-09	ENSMUSG00000026274	chr1	93236492	93271204	protein_coding
Dbp	337.776	-1.12712	0.17592	-6.40701	1.48406e-10	9.67436e-09	ENSMUSG00000059824	chr7	45354512	45359627	protein_coding
Incenp	700.012	-1.80041	0.281028	-6.40651	1.48889e-10	9.67436e-09	ENSMUSG00000024660	chr19	9849660	9876915	protein_coding
Atp13a4	246.257	-2.51506	0.392555	-6.4069	1.48509e-10	9.67436e-09	ENSMUSG00000038094	chr16	29214671	29363682	protein_coding
G0s2	42.8301	3.96437	0.620595	6.388	1.68065e-10	1.08847e-08	ENSMUSG00000009633	chr1	192954469	192955525	protein_coding
Sema3f	13826.5	-1.07489	0.168305	-6.38657	1.69647e-10	1.09513e-08	ENSMUSG00000034684	chr9	107558699	107587674	protein_coding
Gas2l3	138.411	-3.08547	0.483873	-6.37661	1.81049e-10	1.16495e-08	ENSMUSG00000074802	chr10	89244685	89279829	protein_coding
Cdc25b	155.178	-2.50082	0.39271	-6.36811	1.91366e-10	1.22734e-08	ENSMUSG00000027330	chr2	131028869	131040417	protein_coding
Prkg1	295.04	1.6722	0.262937	6.3597	2.02145e-10	1.29229e-08	ENSMUSG00000052920	chr19	30541889	31742433	protein_coding
Krt79	43.6032	-2.96204	0.465816	-6.35881	2.03324e-10	1.29565e-08	ENSMUSG00000061397	chr15	101837767	101848759	protein_coding
Ppp1r15a	2186.44	1.16682	0.183719	6.35109	2.138e-10	1.35804e-08	ENSMUSG00000040435	chr7	45172340	45175692	protein_coding
Atf3	454.713	2.4181	0.381476	6.33882	2.31538e-10	1.46135e-08	ENSMUSG00000026628	chr1	190902493	190950236	protein_coding
Gm13032	561.602	-1.52844	0.241381	-6.33206	2.41904e-10	1.5171e-08	ENSMUSG00000085918	chr4	140538304	140544822	lncRNA
Atp13a2	2994.22	-1.08697	0.171844	-6.32534	2.52668e-10	1.57961e-08	ENSMUSG00000036622	chr4	140714184	140734641	protein_coding
Eda2r	707.611	1.39337	0.220513	6.31879	2.6362e-10	1.6429e-08	ENSMUSG00000034457	chrX	96377446	96420822	protein_coding
Ppard	1227.61	-1.33747	0.211767	-6.31575	2.68847e-10	1.67022e-08	ENSMUSG00000002250	chr17	28451674	28520448	protein_coding
Rnd1	334.085	1.72582	0.273411	6.31219	2.75121e-10	1.70386e-08	ENSMUSG00000054855	chr15	98561302	98575342	protein_coding
Depdc1b	21.7016	-4.4945	0.713963	-6.29514	3.07122e-10	1.89612e-08	ENSMUSG00000021697	chr13	108452866	108544316	protein_coding
E2f7	75.3278	-2.62089	0.417165	-6.28262	3.32906e-10	2.04892e-08	ENSMUSG00000020185	chr10	110581300	110623245	protein_coding
Gpc2	72.4768	-1.88896	0.300951	-6.27662	3.46015e-10	2.12301e-08	ENSMUSG00000029510	chr5	138271917	138278267	protein_coding
Cebpg	2134.49	1.1047	0.176097	6.27325	3.53596e-10	2.16283e-08	ENSMUSG00000056216	chr7	34745847	34755998	protein_coding
Clca3b	698.578	2.02038	0.32291	6.25679	3.92986e-10	2.38901e-08	ENSMUSG00000037033	chr3	144528384	144555118	protein_coding
Clca1	393.727	-6.02375	0.964562	-6.24506	4.23639e-10	2.55966e-08	ENSMUSG00000028255	chr3	144709578	144738537	protein_coding
Tgm2	31907.9	-1.64791	0.263906	-6.24429	4.25716e-10	2.56439e-08	ENSMUSG00000037820	chr2	157958322	157988356	protein_coding
Ablim3	971.319	-1.42247	0.228035	-6.23796	4.43312e-10	2.66229e-08	ENSMUSG00000032735	chr18	61932463	62044895	protein_coding
Mgat4c	1565.26	-3.77156	0.607749	-6.20579	5.44213e-10	3.2388e-08	ENSMUSG00000019888	chr10	101517348	102227330	protein_coding
Lmnb1	1260.36	-1.16733	0.188138	-6.20462	5.48283e-10	3.25326e-08	ENSMUSG00000024590	chr18	56840885	56886496	protein_coding
Mapk15	136.351	-1.35795	0.219032	-6.19978	5.65404e-10	3.33678e-08	ENSMUSG00000063704	chr15	75865618	75871003	protein_coding
Cit	188.243	-4.61311	0.744086	-6.19969	5.65728e-10	3.33678e-08	ENSMUSG00000029516	chr5	115983337	116147006	protein_coding
Bend7	193.127	1.15957	0.187249	6.19267	5.91533e-10	3.47864e-08	ENSMUSG00000048186	chr2	4722642	4806953	protein_coding
C9orf72	570.639	1.13251	0.183127	6.18429	6.23818e-10	3.65764e-08	ENSMUSG00000028300	chr4	35191285	35226175	protein_coding
Lratd2	3033.83	1.04683	0.169577	6.17318	6.69309e-10	3.88984e-08	ENSMUSG00000072568	chr15	60690843	60725627	protein_coding
Mfsd13a	641.605	-1.07321	0.17384	-6.17354	6.6779e-10	3.88984e-08	ENSMUSG00000025227	chr19	46329560	46363691	protein_coding
Col4a1	19.5644	5.11095	0.828802	6.16667	6.97433e-10	4.02966e-08	ENSMUSG00000031502	chr8	11248423	11362826	protein_coding
Btbd17	539.721	-1.55097	0.251549	-6.1657	7.01741e-10	4.04276e-08	ENSMUSG00000000202	chr11	114682043	114686771	protein_coding
Trp53inp2	3215.29	-1.01701	0.165017	-6.16304	7.13617e-10	4.09927e-08	ENSMUSG00000038375	chr2	155222979	155231770	protein_coding
Ssbp4	3584.87	-1.22148	0.198436	-6.15551	7.48376e-10	4.28651e-08	ENSMUSG00000070003	chr8	71050140	71061522	protein_coding
Ulbp1	609.897	-1.7135	0.278493	-6.15277	7.61403e-10	4.34261e-08	ENSMUSG00000079685	chr10	7390362	7423638	protein_coding
Ccl20	393.789	1.89741	0.308669	6.14708	7.89242e-10	4.4762e-08	ENSMUSG00000026166	chr1	83094487	83096888	protein_coding
Fabp5	4256.35	-1.98271	0.322559	-6.14682	7.90528e-10	4.4762e-08	ENSMUSG00000027533	chr3	10077608	10081667	protein_coding
Bmp6	39.7557	2.71471	0.441784	6.14488	8.00221e-10	4.51817e-08	ENSMUSG00000039004	chr13	38529083	38684278	protein_coding
Sema4g	332.9	-1.69046	0.275151	-6.14376	8.05908e-10	4.53735e-08	ENSMUSG00000025207	chr19	44977540	44991836	protein_coding
Abca4	1846.79	-1.40891	0.229389	-6.14201	8.14827e-10	4.57457e-08	ENSMUSG00000028125	chr3	121838092	121973772	protein_coding
Trf	18.7261	5.31928	0.867533	6.1315	8.70543e-10	4.85984e-08	ENSMUSG00000032554	chr9	103081200	103107643	protein_coding
Ldhd	932.873	-1.25904	0.205425	-6.12896	8.84535e-10	4.92408e-08	ENSMUSG00000031958	chr8	112350417	112357006	protein_coding
H2ax	948.292	-1.29381	0.211324	-6.12241	9.21695e-10	5.10228e-08	ENSMUSG00000049932	chr9	44245991	44247374	protein_coding
Cenpi	63.1242	-3.04083	0.497094	-6.11722	9.5223e-10	5.25663e-08	ENSMUSG00000031262	chrX	133208833	133263388	protein_coding
Rad18	223.887	-1.17358	0.192163	-6.10719	1.014e-09	5.58206e-08	ENSMUSG00000030254	chr6	112596811	112673647	protein_coding
Fads3	202.817	2.51784	0.412363	6.10589	1.02232e-09	5.6123e-08	ENSMUSG00000024664	chr19	10018933	10037474	protein_coding
Slc36a4	16.5448	7.58847	1.24515	6.09445	1.09817e-09	6.01202e-08	ENSMUSG00000043885	chr9	15621034	15654657	protein_coding
Penk	3812.76	-3.86706	0.637513	-6.06585	1.3126e-09	7.0688e-08	ENSMUSG00000045573	chr4	4133531	4138819	protein_coding
Tsc22d3	335.869	2.13181	0.352066	6.05516	1.40278e-09	7.51357e-08	ENSMUSG00000031431	chrX	139440277	139501408	protein_coding
Cth	1716.1	3.54439	0.586169	6.0467	1.47844e-09	7.87626e-08	ENSMUSG00000028179	chr3	157599885	157630714	protein_coding
Krt12	155.434	-1.36381	0.226063	-6.03286	1.61085e-09	8.53576e-08	ENSMUSG00000020912	chr11	99306492	99313085	protein_coding
Kctd15	206.391	1.72456	0.286135	6.0271	1.66929e-09	8.82184e-08	ENSMUSG00000030499	chr7	34338439	34356157	protein_coding
Krt4	8633.51	-4.09378	0.679326	-6.02623	1.67824e-09	8.84558e-08	ENSMUSG00000059668	chr15	101826970	101833170	protein_coding
Gars	8039.43	1.00783	0.167602	6.01324	1.81857e-09	9.53665e-08	ENSMUSG00000029777	chr6	55014992	55056485	protein_coding
Ube2t	81.058	-1.71105	0.284957	-6.0046	1.91804e-09	1.00031e-07	ENSMUSG00000026429	chr1	134890303	134901900	protein_coding
Lss	2005.5	-1.15604	0.192734	-5.99813	1.99598e-09	1.0328e-07	ENSMUSG00000033105	chr10	76367422	76392972	protein_coding
Cntrob	365.387	-1.12404	0.188108	-5.9755	2.29382e-09	1.17465e-07	ENSMUSG00000032782	chr11	69190313	69214601	protein_coding
Krt87	2609.8	-3.92792	0.657612	-5.973	2.32924e-09	1.18665e-07	ENSMUSG00000047641	chr15	101328919	101336685	protein_coding
Tnfrsf11b	214.821	2.77339	0.464381	5.97223	2.34037e-09	1.18927e-07	ENSMUSG00000063727	chr15	54114015	54141880	protein_coding
Fbxo48	18.0971	-6.97755	1.17185	-5.95429	2.61199e-09	1.32052e-07	ENSMUSG00000044966	chr11	16901375	16904772	protein_coding
Cep55	137.104	-4.23255	0.711045	-5.95258	2.63947e-09	1.33102e-07	ENSMUSG00000024989	chr19	38043459	38062871	protein_coding
Cenpf	314.925	-7.02118	1.18166	-5.9418	2.81913e-09	1.41085e-07	ENSMUSG00000026605	chr1	189372803	189420283	protein_coding
Nars	13276.4	1.09701	0.184804	5.93605	2.91978e-09	1.45388e-07	ENSMUSG00000024587	chr18	64632718	64649723	protein_coding
Cenpn	74.8306	-2.05901	0.347409	-5.92676	3.08976e-09	1.53466e-07	ENSMUSG00000031756	chr8	117648469	117668246	protein_coding
Adcy7	161.52	-1.67206	0.282279	-5.92342	3.15312e-09	1.56221e-07	ENSMUSG00000031659	chr8	88999031	89056590	protein_coding
Iqgap2	2320.55	-1.53698	0.259822	-5.91549	3.30894e-09	1.63533e-07	ENSMUSG00000021676	chr13	95763682	96028991	protein_coding
Zfp992	311.768	1.42759	0.241983	5.89952	3.64564e-09	1.79725e-07	ENSMUSG00000070605	chr4	146533480	146554749	protein_coding
Ifrd1	1628.45	1.21927	0.206933	5.89209	3.81334e-09	1.86599e-07	ENSMUSG00000001627	chr12	40251566	40298503	protein_coding
Rasgrp1	100.151	-1.64242	0.279044	-5.88586	3.9598e-09	1.92814e-07	ENSMUSG00000027347	chr2	117110474	117173482	protein_coding
Ggta1	357.579	2.31168	0.392968	5.88263	4.03794e-09	1.96137e-07	ENSMUSG00000035778	chr2	35290191	35353243	protein_coding
Gas5	2911.12	1.44734	0.246198	5.87876	4.13361e-09	1.99805e-07	ENSMUSG00000053332	chr1	160861992	160866116	lncRNA
Plk4	147.663	-1.41028	0.239891	-5.87883	4.13182e-09	1.99805e-07	ENSMUSG00000025758	chr3	40754454	40771318	protein_coding
Cers3	559.104	1.38125	0.235032	5.87687	4.18098e-09	2.01603e-07	ENSMUSG00000030510	chr7	66393252	66473439	protein_coding
Mospd3	854.137	-1.37234	0.233747	-5.87106	4.33021e-09	2.08291e-07	ENSMUSG00000037221	chr5	137594907	137599320	protein_coding
Phgdh	5654.5	1.6978	0.28949	5.8648	4.49674e-09	2.15778e-07	ENSMUSG00000053398	chr3	98220486	98247306	protein_coding
C130073F10Rik	342.154	-1.42107	0.243133	-5.84484	5.07067e-09	2.40408e-07	ENSMUSG00000046133	chr4	101747217	101760875	protein_coding
Scnn1b	1969.53	-1.54562	0.264868	-5.83545	5.36465e-09	2.53739e-07	ENSMUSG00000030873	chr7	121464261	121517737	protein_coding
Dsel	140.792	1.80921	0.310469	5.82733	5.63195e-09	2.64488e-07	ENSMUSG00000038702	chr1	111786432	111792648	protein_coding
Sqstm1	14414.9	1.06127	0.182317	5.82101	5.84934e-09	2.74048e-07	ENSMUSG00000015837	chr11	50090193	50101654	protein_coding
Bub1	158.291	-5.16587	0.892966	-5.78507	7.24815e-09	3.36402e-07	ENSMUSG00000027379	chr2	127643036	127673785	protein_coding
Usp53	1646.31	1.1524	0.199543	5.77521	7.68565e-09	3.54219e-07	ENSMUSG00000039701	chr3	122725142	122778159	protein_coding
Xlr3a	57.2181	9.37796	1.62437	5.77328	7.77426e-09	3.57472e-07	ENSMUSG00000057836	chrX	72129899	72140701	protein_coding
Palm	403.304	-1.08776	0.188576	-5.7683	8.00755e-09	3.65828e-07	ENSMUSG00000035863	chr10	79629406	79656730	protein_coding
Abca2	1942.25	-1.23753	0.214523	-5.76873	7.98709e-09	3.65828e-07	ENSMUSG00000026944	chr2	25318715	25338552	protein_coding
Hmmr	196.088	-5.43974	0.945983	-5.75035	8.90573e-09	4.03876e-07	ENSMUSG00000020330	chr11	40592222	40624249	protein_coding
Cav1	1961.19	1.14722	0.199843	5.74062	9.433e-09	4.25839e-07	ENSMUSG00000007655	chr6	17306334	17341451	protein_coding
Pkn3	663.976	-1.46154	0.254704	-5.73818	9.57018e-09	4.30315e-07	ENSMUSG00000026785	chr2	29967696	29981034	protein_coding
Foxa1	864.098	-1.2135	0.211803	-5.72937	1.00805e-08	4.51982e-07	ENSMUSG00000035451	chr12	57587414	57593702	protein_coding
Padi2	61645.7	-1.44099	0.251544	-5.72858	1.01276e-08	4.53069e-07	ENSMUSG00000028927	chr4	140633655	140679897	protein_coding
Lzts3	1836.26	-1.63529	0.285658	-5.72466	1.03638e-08	4.6259e-07	ENSMUSG00000037703	chr2	130474759	130484723	protein_coding
Synm	85.4636	3.05642	0.534217	5.7213	1.0571e-08	4.70779e-07	ENSMUSG00000030554	chr7	67379908	67409490	protein_coding
Mfsd12	374.396	-1.00908	0.176795	-5.70765	1.14546e-08	5.05583e-07	ENSMUSG00000034854	chr10	81193325	81202059	protein_coding
Tmem97	320.698	-1.37822	0.241455	-5.70797	1.14333e-08	5.05583e-07	ENSMUSG00000037278	chr11	78432643	78441603	protein_coding
Srrm4	25.8279	3.27828	0.574603	5.70529	1.16145e-08	5.10368e-07	ENSMUSG00000063919	chr5	116577334	116729876	protein_coding
Pmvk	417.589	-1.4197	0.248943	-5.7029	1.17787e-08	5.16437e-07	ENSMUSG00000027952	chr3	89361848	89376320	protein_coding
Sars	7103.08	1.01207	0.177478	5.7025	1.18066e-08	5.1652e-07	ENSMUSG00000068739	chr3	108332181	108352525	protein_coding
Tex2	26777.6	-1.10253	0.193547	-5.69645	1.22324e-08	5.3397e-07	ENSMUSG00000040548	chr11	106392973	106504249	protein_coding
Selenbp1	3891.65	-1.2824	0.226421	-5.66379	1.48065e-08	6.39292e-07	ENSMUSG00000068874	chr3	94840367	94852069	protein_coding
Cntnap1	466.666	-1.52345	0.269174	-5.65974	1.51605e-08	6.50325e-07	ENSMUSG00000017167	chr11	101061349	101081550	protein_coding
Plekhg6	637.376	-1.01178	0.179007	-5.65216	1.58448e-08	6.78213e-07	ENSMUSG00000038167	chr6	125339623	125357756	protein_coding
Kcne3	357.532	-1.66946	0.295508	-5.64946	1.6095e-08	6.87438e-07	ENSMUSG00000035165	chr7	99825709	99834076	protein_coding
Smc4	684.521	-1.16783	0.206836	-5.64617	1.64062e-08	6.99222e-07	ENSMUSG00000034349	chr3	68912071	68941956	protein_coding
Rfng	658.182	-1.37807	0.244161	-5.64407	1.66072e-08	7.04758e-07	ENSMUSG00000025158	chr11	120671572	120675033	protein_coding
Spdl1	133.972	-1.28462	0.228203	-5.62927	1.80978e-08	7.61489e-07	ENSMUSG00000069910	chr11	34700017	34724468	protein_coding
Mvk	571.966	-1.03981	0.184749	-5.62823	1.82069e-08	7.64458e-07	ENSMUSG00000041939	chr5	114582330	114598652	protein_coding
Six5	321.763	-1.06317	0.188979	-5.62589	1.8455e-08	7.73238e-07	ENSMUSG00000040841	chr7	18828519	18832474	protein_coding
Kifc5b	93.1471	-1.84708	0.328643	-5.62031	1.90612e-08	7.91939e-07	ENSMUSG00000024301	chr17	27136065	27151557	protein_coding
Rassf1	1605.86	1.31625	0.234475	5.6136	1.98162e-08	8.19869e-07	ENSMUSG00000010067	chr9	107428754	107439466	protein_coding
Palm3	42.3502	2.18764	0.390883	5.59664	2.1854e-08	9.02299e-07	ENSMUSG00000047986	chr8	84748100	84756924	protein_coding
Gmnn	144.365	-1.69616	0.303155	-5.59502	2.20602e-08	9.08917e-07	ENSMUSG00000006715	chr13	24935828	24945906	protein_coding
Lox	36.1625	3.77847	0.6761	5.58863	2.2887e-08	9.37136e-07	ENSMUSG00000024529	chr18	52649139	52662939	protein_coding
Pcsk5	286.913	1.80664	0.323621	5.58259	2.36959e-08	9.68259e-07	ENSMUSG00000024713	chr19	17409683	17814996	protein_coding
Pdlim1	1368.01	1.58181	0.28387	5.57229	2.51414e-08	1.02521e-06	ENSMUSG00000055044	chr19	40209617	40260286	protein_coding
Rhob	1272.25	1.22299	0.21977	5.56485	2.62377e-08	1.06553e-06	ENSMUSG00000054364	chr12	8547661	8550009	protein_coding
1810019D21Rik	395.616	-1.35581	0.243921	-5.5584	2.72251e-08	1.10112e-06	ENSMUSG00000086390	chr8	106862013	106865358	lncRNA
Dck	212.105	-1.30497	0.235264	-5.54682	2.90907e-08	1.17417e-06	ENSMUSG00000029366	chr5	88912855	88931140	protein_coding
Mx1	380.285	-1.79104	0.323142	-5.54258	2.9804e-08	1.19808e-06	ENSMUSG00000000386	chr16	97248235	97264107	protein_coding
St6galnac2	643.728	-1.22144	0.221026	-5.52623	3.27181e-08	1.30991e-06	ENSMUSG00000057286	chr11	116566129	116585694	protein_coding
Gm9195	494.682	-1.28101	0.231981	-5.52207	3.3503e-08	1.33863e-06	ENSMUSG00000109446	chr14	72663453	72729278	protein_coding
Rnf207	109.162	-1.21975	0.22159	-5.50455	3.7012e-08	1.4729e-06	ENSMUSG00000058498	chr4	152391476	152403450	protein_coding
Pkd1l2	31.4563	-4.07835	0.742902	-5.48975	4.02503e-08	1.59536e-06	ENSMUSG00000034416	chr8	117722418	117809188	protein_coding
9930014A18Rik	116.687	1.40645	0.256251	5.48855	4.05238e-08	1.60299e-06	ENSMUSG00000097493	chr15	60694120	60703642	lncRNA
Kif24	124.217	-1.99386	0.363402	-5.48666	4.09605e-08	1.61704e-06	ENSMUSG00000028438	chr4	41390745	41464887	protein_coding
Dhfr	125.489	-1.74674	0.318583	-5.48284	4.18551e-08	1.6458e-06	ENSMUSG00000021707	chr13	92491234	92525561	protein_coding
Msh6	1323.44	-1.08574	0.198136	-5.47979	4.25838e-08	1.67114e-06	ENSMUSG00000005370	chr17	88282490	88298320	protein_coding
Scel	424.525	1.69739	0.309961	5.47614	4.34705e-08	1.69586e-06	ENSMUSG00000022123	chr14	103750778	103850233	protein_coding
Pgap1	702.468	-1.07182	0.195782	-5.47456	4.38608e-08	1.70773e-06	ENSMUSG00000073678	chr1	54512153	54596843	protein_coding
Gstt3	638.845	-1.19955	0.219193	-5.47258	4.43533e-08	1.72014e-06	ENSMUSG00000001665	chr10	75609949	75617248	protein_coding
Serpinb9	461.076	1.39354	0.254761	5.46999	4.50061e-08	1.74205e-06	ENSMUSG00000045827	chr13	33187233	33201940	protein_coding
Mgmt	286.946	1.30492	0.239387	5.45109	5.00617e-08	1.9302e-06	ENSMUSG00000054612	chr7	136496343	136731995	protein_coding
Gm3571	50.6231	-1.99016	0.365181	-5.44978	5.0431e-08	1.94066e-06	ENSMUSG00000090610	chr10	93614522	93615581	processed_pseudogene
Wfdc18	38.7238	8.23374	1.51104	5.44907	5.06332e-08	1.94467e-06	ENSMUSG00000000983	chr11	83599841	83602174	protein_coding
Entrep3	286.005	-1.42123	0.261508	-5.43473	5.48783e-08	2.0915e-06	ENSMUSG00000032657	chr3	89090450	89096602	protein_coding
Tmprss4	4916.99	-1.00733	0.185464	-5.43144	5.59008e-08	2.12638e-06	ENSMUSG00000032091	chr9	45084024	45115390	protein_coding
Ttyh3	2245.15	-1.10228	0.203065	-5.42822	5.69188e-08	2.16095e-06	ENSMUSG00000036565	chr5	140606333	140634786	protein_coding
Tmem121	21.1574	-3.20076	0.590291	-5.42234	5.88228e-08	2.22048e-06	ENSMUSG00000049036	chr12	113149550	113153143	protein_coding
Camk1g	227.814	-2.45983	0.453854	-5.41988	5.96374e-08	2.24449e-06	ENSMUSG00000016179	chr1	193028654	193052606	protein_coding
Ar	393.4	1.25134	0.230909	5.41922	5.98606e-08	2.24681e-06	ENSMUSG00000046532	chrX	97192375	97366821	protein_coding
Slc38a1	475.61	2.02344	0.373569	5.4165	6.07756e-08	2.27685e-06	ENSMUSG00000023169	chr15	96469299	96540794	protein_coding
Mdfic	566.403	1.61633	0.299242	5.40142	6.61154e-08	2.44454e-06	ENSMUSG00000041390	chr6	15720660	15802168	protein_coding
Kcng1	126.155	-2.49012	0.461601	-5.39453	6.87014e-08	2.53071e-06	ENSMUSG00000074575	chr2	168102037	168123656	protein_coding
Orc1	87.4442	-1.45166	0.269222	-5.39207	6.96515e-08	2.56095e-06	ENSMUSG00000028587	chr4	108436620	108472030	protein_coding
Prim1	129.99	-1.86602	0.346129	-5.3911	7.00272e-08	2.57e-06	ENSMUSG00000025395	chr10	127851037	127865906	protein_coding
As3mt	117.495	1.25393	0.232685	5.38896	7.08651e-08	2.58874e-06	ENSMUSG00000003559	chr19	46695897	46729538	protein_coding
Chia1	74.4044	-1.68924	0.313639	-5.38595	7.20638e-08	2.62048e-06	ENSMUSG00000062778	chr3	106020545	106039436	protein_coding
Timm10	197.155	1.12898	0.209715	5.38341	7.30858e-08	2.65277e-06	ENSMUSG00000027076	chr2	84657341	84660557	protein_coding
Jak3	2493.94	-1.23297	0.229221	-5.37898	7.49109e-08	2.71405e-06	ENSMUSG00000031805	chr8	72128940	72143219	protein_coding
Fxyd4	330.736	-4.27346	0.798601	-5.35118	8.73827e-08	3.12027e-06	ENSMUSG00000004988	chr6	117910520	117914653	protein_coding
Arhgap28	456.786	1.6394	0.307305	5.33475	9.56784e-08	3.38599e-06	ENSMUSG00000024043	chr17	68149708	68311115	protein_coding
Col5a2	19.7971	4.01213	0.752354	5.33277	9.67242e-08	3.4169e-06	ENSMUSG00000026042	chr1	45413481	45542442	protein_coding
Atp13a5	130.617	1.98929	0.373348	5.32825	9.91624e-08	3.4968e-06	ENSMUSG00000048939	chr16	29050603	29197550	protein_coding
Hdac7	7659.83	-1.12807	0.211913	-5.32324	1.01938e-07	3.58828e-06	ENSMUSG00000022475	chr15	97690545	97742383	protein_coding
Trim59	457.815	-1.21512	0.22894	-5.3076	1.11081e-07	3.89233e-06	ENSMUSG00000034317	chr3	68942621	68952088	protein_coding
Cyp4a12a	150.412	-2.03921	0.38424	-5.30714	1.11361e-07	3.89233e-06	ENSMUSG00000066071	chr4	115156243	115190012	protein_coding
Map3k12	70.3873	-1.39915	0.263847	-5.30291	1.13974e-07	3.96101e-06	ENSMUSG00000023050	chr15	102406081	102425499	protein_coding
Kif18a	54.2397	-2.12529	0.400797	-5.30266	1.14125e-07	3.96101e-06	ENSMUSG00000027115	chr2	109111083	109172092	protein_coding
Hr	38.1258	2.18478	0.412112	5.30142	1.14908e-07	3.98121e-06	ENSMUSG00000022096	chr14	70789652	70810988	protein_coding
Cald1	2041.06	1.50694	0.284348	5.29964	1.16028e-07	4.013e-06	ENSMUSG00000029761	chr6	34575435	34752408	protein_coding
Tonsl	400.351	-1.329	0.250937	-5.29615	1.18272e-07	4.08347e-06	ENSMUSG00000059323	chr15	76510202	76524158	protein_coding
Frmd5	107.475	-2.34081	0.442192	-5.29366	1.19895e-07	4.13232e-06	ENSMUSG00000027238	chr2	121376010	121637568	protein_coding
Col1a2	7.78583	6.50212	1.23063	5.28356	1.26694e-07	4.34399e-06	ENSMUSG00000029661	chr6	4504814	4541544	protein_coding
Ppp2r2b	1208.8	1.66205	0.314771	5.28019	1.2905e-07	4.40014e-06	ENSMUSG00000024500	chr18	42770497	43216192	protein_coding
Mns1	10.4652	-6.77499	1.28323	-5.27963	1.29442e-07	4.40014e-06	ENSMUSG00000032221	chr9	72345293	72369307	protein_coding
Mms22l	235.047	-1.55836	0.295219	-5.27864	1.30143e-07	4.41641e-06	ENSMUSG00000045751	chr4	24496451	24602950	protein_coding
Gm26226	215.19	-1.70622	0.323251	-5.27832	1.30374e-07	4.41665e-06	ENSMUSG00000064443	chr4	140645995	140646110	snRNA
Syne1	263.765	1.39877	0.265263	5.27313	1.34114e-07	4.52943e-06	ENSMUSG00000096054	chr10	4970917	5501482	protein_coding
Phtf1	421.71	-1.09692	0.208024	-5.27307	1.3416e-07	4.52943e-06	ENSMUSG00000058388	chr3	103875426	103931914	protein_coding
Haus8	252.751	-1.07986	0.204823	-5.27214	1.34844e-07	4.54479e-06	ENSMUSG00000035439	chr8	71701205	71725578	protein_coding
Ripor2	23.6409	4.24877	0.807423	5.26213	1.42396e-07	4.76692e-06	ENSMUSG00000036006	chr13	24685508	24917799	protein_coding
Gm6166	43.2352	-2.36786	0.450581	-5.25512	1.47929e-07	4.92714e-06	ENSMUSG00000074280	chr9	57391246	57391654	processed_pseudogene
Rpl12	22560.8	1.34111	0.255538	5.24818	1.53609e-07	5.06525e-06	ENSMUSG00000038900	chr2	32851571	32855357	protein_coding
Snhg12	293.082	1.06149	0.202304	5.24701	1.54584e-07	5.08484e-06	ENSMUSG00000086290	chr4	132035932	132038762	lncRNA
Elapor2	136.142	-1.53673	0.292885	-5.24686	1.54716e-07	5.08484e-06	ENSMUSG00000056004	chr5	9316118	9531825	protein_coding
Map2k3os	54.2105	1.63157	0.311066	5.24508	1.56214e-07	5.12559e-06	ENSMUSG00000042549	chr11	60811733	60822769	lncRNA
4933421O10Rik	130.423	1.08766	0.207397	5.24433	1.5685e-07	5.13794e-06	ENSMUSG00000085037	chr4	33027142	33031323	lncRNA
Atf4	8113.72	1.18998	0.227014	5.24188	1.58953e-07	5.18967e-06	ENSMUSG00000042406	chr15	80139385	80141742	protein_coding
Gen1	129.711	-1.52449	0.290937	-5.23992	1.60646e-07	5.22773e-06	ENSMUSG00000051235	chr12	11288921	11315802	protein_coding
Rbl1	551.674	-1.14533	0.218827	-5.23393	1.65947e-07	5.38255e-06	ENSMUSG00000027641	chr2	156987813	157046454	protein_coding
Fbxo5	118.412	-1.741	0.332892	-5.22993	1.69571e-07	5.49111e-06	ENSMUSG00000019773	chr10	5749160	5755600	protein_coding
Fyb	105.087	-1.41168	0.26995	-5.22942	1.70042e-07	5.49737e-06	ENSMUSG00000022148	chr15	6552334	6692794	protein_coding
Klhdc8b	319.218	-1.11344	0.21316	-5.22349	1.75582e-07	5.63967e-06	ENSMUSG00000032609	chr9	108324835	108338780	protein_coding
Gm43305	381.4	1.7009	0.325649	5.22311	1.75939e-07	5.64202e-06	ENSMUSG00000105703	chr14	54529900	54534913	lncRNA
Dse	57.212	1.7111	0.327871	5.21883	1.80061e-07	5.72331e-06	ENSMUSG00000039497	chr10	34027389	34083711	protein_coding
Cxcl5	2222.93	1.67001	0.320007	5.21868	1.80207e-07	5.72331e-06	ENSMUSG00000029371	chr5	90907219	90909483	protein_coding
Gm15600	75.2968	-1.82954	0.350562	-5.21887	1.80019e-07	5.72331e-06	ENSMUSG00000085969	chr9	24207435	24211553	lncRNA
Dscam	177.169	-2.14755	0.411922	-5.21349	1.85325e-07	5.84835e-06	ENSMUSG00000050272	chr16	96392040	96971952	protein_coding
Il24	277.123	-1.22904	0.235812	-5.21195	1.86861e-07	5.86919e-06	ENSMUSG00000026420	chr1	130809811	130815191	protein_coding
Recql4	61.8696	-2.27437	0.436772	-5.20723	1.9168e-07	5.99168e-06	ENSMUSG00000033762	chr15	76587753	76594748	protein_coding
Gm49636	92.1503	-2.92758	0.562297	-5.20646	1.92474e-07	6.00701e-06	ENSMUSG00000116814	chr16	29569628	29573130	lncRNA
E2f2	113.948	-2.7051	0.519829	-5.20382	1.95238e-07	6.08368e-06	ENSMUSG00000018983	chr4	135899705	135923368	protein_coding
Rps3a1	17394.3	1.30547	0.251047	5.2001	1.99178e-07	6.19671e-06	ENSMUSG00000028081	chr3	86045247	86050009	protein_coding
Pmaip1	3097.91	1.36486	0.264483	5.16048	2.4632e-07	7.49858e-06	ENSMUSG00000024521	chr18	66591604	66598636	protein_coding
Aptx	515.374	1.02498	0.198715	5.15805	2.49538e-07	7.58488e-06	ENSMUSG00000028411	chr4	40682382	40703194	protein_coding
Gm6667	6.77396	-6.14489	1.19315	-5.15016	2.60271e-07	7.8509e-06	ENSMUSG00000110787	chr10	3162803	3185033	unprocessed_pseudogene
Col8a1	512.189	-1.80158	0.350191	-5.14455	2.68168e-07	8.07683e-06	ENSMUSG00000068196	chr16	57444621	57575100	protein_coding
Dus4l	223.445	1.13389	0.220454	5.14344	2.69756e-07	8.11233e-06	ENSMUSG00000020648	chr12	31690049	31704825	protein_coding
Prdm16	104.072	1.46583	0.285349	5.13699	2.7918e-07	8.3451e-06	ENSMUSG00000039410	chr4	154400582	154721330	protein_coding
Snhg1	925.058	1.4141	0.275476	5.13328	2.84729e-07	8.47262e-06	ENSMUSG00000108414	chr19	8700801	8703811	lncRNA
Lpcat4	2670.75	-1.12362	0.218993	-5.13083	2.88471e-07	8.55827e-06	ENSMUSG00000027134	chr2	112069813	112077456	protein_coding
Cdh16	58.05	-3.13097	0.610207	-5.131	2.88214e-07	8.55827e-06	ENSMUSG00000031881	chr8	105328543	105351028	protein_coding
Abca1	1569.9	1.36557	0.266202	5.12984	2.89995e-07	8.57115e-06	ENSMUSG00000015243	chr4	53030787	53159895	protein_coding
Zan	63.6649	-1.96171	0.382422	-5.1297	2.90203e-07	8.57115e-06	ENSMUSG00000079173	chr5	137376899	137475326	protein_coding
Eme1	30.861	-2.94788	0.57461	-5.13023	2.89384e-07	8.57115e-06	ENSMUSG00000039055	chr11	94535822	94544790	protein_coding
Gm6560	299.662	-1.02567	0.200086	-5.12613	2.95761e-07	8.72231e-06	ENSMUSG00000104913	chr5	22929576	22931166	processed_pseudogene
Slc7a4	1034.77	-1.05188	0.205221	-5.12561	2.96576e-07	8.73334e-06	ENSMUSG00000022756	chr16	17389882	17401078	protein_coding
Gmpr	465.593	-1.18926	0.232044	-5.12514	2.97312e-07	8.74202e-06	ENSMUSG00000000253	chr13	45660920	45707276	protein_coding
Phf10	2079	1.00622	0.196442	5.12222	3.01956e-07	8.86541e-06	ENSMUSG00000023883	chr17	15165271	15181535	protein_coding
Serping1	32.5288	-3.52839	0.689584	-5.1167	3.10925e-07	9.08837e-06	ENSMUSG00000023224	chr2	84595731	84605788	protein_coding
Spred3	518.342	-1.23235	0.241059	-5.11221	3.18409e-07	9.29341e-06	ENSMUSG00000037239	chr7	28858254	28869836	protein_coding
Tgfb3	1673.72	-1.03012	0.202026	-5.09895	3.41545e-07	9.89581e-06	ENSMUSG00000021253	chr12	86103519	86125815	protein_coding
Poc1a	111.445	-1.41812	0.278208	-5.09732	3.44489e-07	9.96655e-06	ENSMUSG00000023345	chr9	106158260	106227720	protein_coding
Ldha	23266.7	-1.02981	0.202251	-5.09176	3.54759e-07	1.02338e-05	ENSMUSG00000063229	chr7	46490899	46505051	protein_coding
Camk2b	186.713	-1.2671	0.24909	-5.08692	3.63933e-07	1.04832e-05	ENSMUSG00000057897	chr11	5919644	6016362	protein_coding
Chrna4	10.9859	-5.66196	1.11349	-5.08486	3.67899e-07	1.0582e-05	ENSMUSG00000027577	chr2	180660173	180685339	protein_coding
Cyfip2	126.418	-4.93714	0.972153	-5.07856	3.80301e-07	1.08913e-05	ENSMUSG00000020340	chr11	46084677	46203686	protein_coding
Ldhb	412.957	1.54402	0.304412	5.07213	3.9339e-07	1.12014e-05	ENSMUSG00000030246	chr6	142435975	142453683	protein_coding
Slc27a2	1317.58	-1.7425	0.344111	-5.06379	4.11011e-07	1.16529e-05	ENSMUSG00000027359	chr2	126394327	126430163	protein_coding
Acot2	191.821	1.65422	0.326748	5.06269	4.13371e-07	1.17031e-05	ENSMUSG00000021226	chr12	84034635	84040647	protein_coding
Zfhx2	598.523	-1.12595	0.222513	-5.06016	4.18902e-07	1.18428e-05	ENSMUSG00000040721	chr14	55297719	55329781	protein_coding
Anxa8	804.411	1.82484	0.360948	5.05569	4.28848e-07	1.20895e-05	ENSMUSG00000021950	chr14	33807938	33822528	protein_coding
Depdc1a	57.954	-5.47557	1.08353	-5.05343	4.33934e-07	1.22155e-05	ENSMUSG00000028175	chr3	159201070	159235592	protein_coding
Hirip3	229.231	-1.12733	0.22312	-5.05256	4.3592e-07	1.2254e-05	ENSMUSG00000042606	chr7	126461144	126464549	protein_coding
Shisa2	379.665	1.69706	0.336434	5.04425	4.55303e-07	1.27499e-05	ENSMUSG00000044461	chr14	59862757	59869109	protein_coding
Slc39a10	1453.33	-1.02116	0.202455	-5.0439	4.56134e-07	1.27499e-05	ENSMUSG00000025986	chr1	46846704	46932012	protein_coding
8430419K02Rik	38.5452	4.83551	0.958826	5.04316	4.57902e-07	1.27747e-05	ENSMUSG00000085743	chr11	18795851	18824309	lncRNA
Kif5c	2517.34	1.09133	0.216472	5.04142	4.62099e-07	1.28622e-05	ENSMUSG00000026764	chr2	49509310	49664790	protein_coding
Adamts1	866.02	1.62729	0.323307	5.03326	4.82206e-07	1.33469e-05	ENSMUSG00000022893	chr16	85590715	85600001	protein_coding
Cmtm3	189.775	2.44139	0.485265	5.03104	4.8783e-07	1.34649e-05	ENSMUSG00000031875	chr8	105066042	105074304	protein_coding
Bmp4	70.8956	2.50144	0.49748	5.02823	4.95027e-07	1.36256e-05	ENSMUSG00000021835	chr14	46620977	46628126	protein_coding
Cxcl13	81.6807	-2.01506	0.400978	-5.02536	5.02478e-07	1.38115e-05	ENSMUSG00000023078	chr5	96104810	96108927	protein_coding
Il17rb	238.046	-2.19057	0.43699	-5.01286	5.36282e-07	1.46594e-05	ENSMUSG00000015966	chr14	29718092	29730853	protein_coding
Slit2	875.98	1.23372	0.246705	5.00078	5.71002e-07	1.55228e-05	ENSMUSG00000031558	chr5	48140480	48465075	protein_coding
Snhg7os	55.7534	-2.18897	0.4378	-4.99993	5.73524e-07	1.557e-05	ENSMUSG00000086775	chr2	26530384	26535956	lncRNA
Nrm	32.4052	-2.17612	0.435553	-4.99624	5.8459e-07	1.5827e-05	ENSMUSG00000059791	chr17	36172210	36176294	protein_coding
Zfas1	936.01	1.20412	0.241421	4.98763	6.11235e-07	1.65033e-05	ENSMUSG00000074578	chr2	166904854	166907783	lncRNA
Il36a	865.275	1.5365	0.309155	4.97	6.69512e-07	1.80356e-05	ENSMUSG00000026984	chr2	24105430	24115714	protein_coding
Jdp2	949.354	1.39854	0.281672	4.96514	6.86527e-07	1.84358e-05	ENSMUSG00000034271	chr12	85645801	85686652	protein_coding
Ccn2	17240.3	1.00627	0.202771	4.96257	6.95666e-07	1.86559e-05	ENSMUSG00000019997	chr10	24471340	24474581	protein_coding
Add2	716.158	-3.5076	0.706984	-4.96135	7.00045e-07	1.8748e-05	ENSMUSG00000030000	chr6	86005663	86101391	protein_coding
2410006H16Rik	1281.19	1.70489	0.343969	4.95653	7.17621e-07	1.91411e-05	ENSMUSG00000086841	chr11	62493650	62495725	lncRNA
Efcab2	59.4089	1.24011	0.250185	4.95677	7.16737e-07	1.91411e-05	ENSMUSG00000026495	chr1	178233650	178312078	protein_coding
D430020J02Rik	144.152	-1.44197	0.290897	-4.95697	7.16022e-07	1.91411e-05	ENSMUSG00000112980	chr12	116365567	116368830	lncRNA
Asb2	16.3335	-6.24164	1.25965	-4.95507	7.23044e-07	1.92598e-05	ENSMUSG00000021200	chr12	103287401	103322260	protein_coding
Blm	118.858	-1.69196	0.342588	-4.93876	7.86203e-07	2.08581e-05	ENSMUSG00000030528	chr7	80104481	80184867	protein_coding
mt-Ts2	48.2691	-2.69601	0.546342	-4.93465	8.02953e-07	2.1274e-05	ENSMUSG00000064365	chrM	11613	11671	Mt_tRNA
Acacb	591.767	-1.75202	0.355108	-4.93376	8.06628e-07	2.13428e-05	ENSMUSG00000042010	chr5	114284596	114388822	protein_coding
Klf6	4634.23	1.30549	0.265239	4.92195	8.56876e-07	2.25819e-05	ENSMUSG00000000078	chr13	5911481	5920393	protein_coding
Podn	304.23	-1.57179	0.319589	-4.91817	8.73574e-07	2.29914e-05	ENSMUSG00000028600	chr4	107871988	107953642	protein_coding
Hmcn1	51.5508	-2.61062	0.532151	-4.90579	9.30544e-07	2.43613e-05	ENSMUSG00000066842	chr1	150438275	150869186	protein_coding
Sdf2l1	628.113	-1.28905	0.263017	-4.90101	9.53448e-07	2.48297e-05	ENSMUSG00000022769	chr16	16948002	16950247	protein_coding
Slc7a5	6787.54	1.23799	0.253591	4.88184	1.051e-06	2.70855e-05	ENSMUSG00000040010	chr8	122607889	122634433	protein_coding
Sox21	32.5676	2.56708	0.526088	4.87957	1.06318e-06	2.73282e-05	ENSMUSG00000061517	chr14	118470644	118474442	protein_coding
Slc34a2	3567.38	-1.15014	0.236223	-4.86886	1.12245e-06	2.8629e-05	ENSMUSG00000029188	chr5	53195423	53229006	protein_coding
Slc25a33	662.085	1.17968	0.242413	4.8664	1.13647e-06	2.89494e-05	ENSMUSG00000028982	chr4	149828493	149858734	protein_coding
Sprr2f	60797.5	-1.54236	0.317253	-4.8616	1.16441e-06	2.95471e-05	ENSMUSG00000050635	chr3	92272494	92273749	protein_coding
Sh2d5	654.678	-1.08223	0.222692	-4.85979	1.17513e-06	2.97809e-05	ENSMUSG00000045349	chr4	137977714	137988643	protein_coding
Rnase4	193.551	1.42729	0.293758	4.85874	1.18137e-06	2.99009e-05	ENSMUSG00000021876	chr14	51328534	51343608	protein_coding
Ly6e	16752	-1.0197	0.210134	-4.85259	1.21859e-06	3.08036e-05	ENSMUSG00000022587	chr15	74826900	74831752	protein_coding
Speg	116.65	-1.78409	0.367896	-4.84944	1.23812e-06	3.12176e-05	ENSMUSG00000026207	chr1	75351941	75408964	protein_coding
Fscn1	123.222	1.8668	0.385007	4.84873	1.24254e-06	3.12497e-05	ENSMUSG00000029581	chr5	142946098	142958940	protein_coding
Trim35	3327.69	1.12169	0.231332	4.84882	1.24197e-06	3.12497e-05	ENSMUSG00000022043	chr14	66534480	66548873	protein_coding
Clca3a2	913.186	-3.01571	0.622605	-4.84369	1.27448e-06	3.19716e-05	ENSMUSG00000028262	chr3	144502320	144525255	protein_coding
Msx2	468.467	1.34299	0.277433	4.84076	1.29341e-06	3.23646e-05	ENSMUSG00000021469	chr13	53620920	53627110	protein_coding
Cmc2	129.361	-1.663	0.343873	-4.83609	1.32421e-06	3.29689e-05	ENSMUSG00000014633	chr8	117615424	117648194	protein_coding
4833427F10Rik	214.09	-1.73188	0.35831	-4.83346	1.34179e-06	3.33228e-05	ENSMUSG00000092171	chr17	36083342	36091579	lncRNA
Kif14	137.164	-6.9546	1.44001	-4.82957	1.36829e-06	3.38537e-05	ENSMUSG00000041498	chr1	136394081	136459249	protein_coding
Atf5	6257.38	1.98295	0.411298	4.8212	1.42695e-06	3.51296e-05	ENSMUSG00000038539	chr7	44461680	44466082	protein_coding
Ccdc69	59.0062	-1.2496	0.259454	-4.81625	1.46278e-06	3.59223e-05	ENSMUSG00000049588	chr11	54940557	54968957	protein_coding
Eef1b2	15820.8	1.09888	0.228175	4.81598	1.4648e-06	3.59276e-05	ENSMUSG00000025967	chr1	63215984	63219645	protein_coding
ENSMUSG00000120212	30.5588	3.87683	0.805388	4.81362	1.48222e-06	3.6265e-05	ENSMUSG00000120212	chr16	65461959	65551514	lncRNA
Skida1	42.6096	-2.08175	0.432867	-4.80921	1.51527e-06	3.69822e-05	ENSMUSG00000054074	chr2	18045487	18053862	protein_coding
Asap3	44.8049	-1.55023	0.322862	-4.80151	1.57477e-06	3.8246e-05	ENSMUSG00000036995	chr4	135933676	135972527	protein_coding
Hs3st6	467.527	-1.5014	0.31277	-4.80034	1.58396e-06	3.84222e-05	ENSMUSG00000039628	chr17	24971962	24977658	protein_coding
Slc7a3	1110.04	3.6525	0.761258	4.79797	1.60278e-06	3.87838e-05	ENSMUSG00000031297	chrX	100122816	100129626	protein_coding
Ace	163.65	-1.8518	0.386496	-4.79126	1.65739e-06	3.99589e-05	ENSMUSG00000020681	chr11	105858771	105880790	protein_coding
Rdh11	1111.62	-1.11004	0.231871	-4.78731	1.69035e-06	4.06052e-05	ENSMUSG00000066441	chr12	79221111	79239067	protein_coding
Obp2a	482.433	-4.05803	0.848799	-4.78091	1.74502e-06	4.1616e-05	ENSMUSG00000062061	chr2	25590055	25593338	protein_coding
Hspb1	1998.53	1.08561	0.227438	4.77324	1.8129e-06	4.29761e-05	ENSMUSG00000004951	chr5	135916773	135918417	protein_coding
Pola1	300.049	-1.09398	0.229291	-4.77113	1.83198e-06	4.33765e-05	ENSMUSG00000006678	chrX	92348373	92675761	protein_coding
Bcl11a	12.9602	6.06154	1.27076	4.77001	1.84216e-06	4.35136e-05	ENSMUSG00000000861	chr11	24028056	24124123	protein_coding
Tuba1a	475.632	1.37583	0.288492	4.76904	1.85102e-06	4.36347e-05	ENSMUSG00000072235	chr15	98847718	98851584	protein_coding
Rcor2	218.187	-1.09221	0.22926	-4.76407	1.89729e-06	4.45504e-05	ENSMUSG00000024968	chr19	7244690	7252590	protein_coding
Gm34654	5.6614	6.03962	1.26898	4.75942	1.94152e-06	4.54812e-05	ENSMUSG00000111253	chr9	77714318	77717075	lncRNA
Kat8	464.321	1.03882	0.218285	4.75899	1.94567e-06	4.55246e-05	ENSMUSG00000030801	chr7	127511688	127525009	protein_coding
Gm20667	12.1103	-5.24384	1.10532	-4.74418	2.09351e-06	4.84688e-05	ENSMUSG00000093726	chr14	67910626	67912555	lncRNA
Il18	70.1187	-1.61796	0.341219	-4.7417	2.11929e-06	4.89511e-05	ENSMUSG00000039217	chr9	50466127	50493140	protein_coding
Trex2	282.267	-1.10988	0.234098	-4.74106	2.12601e-06	4.90491e-05	ENSMUSG00000031372	chrX	72477311	72478950	protein_coding
Arhgap45	82.791	-1.27758	0.270622	-4.72089	2.34816e-06	5.3861e-05	ENSMUSG00000035697	chr10	79852487	79867306	protein_coding
Chek1	110.974	-1.6453	0.348555	-4.72035	2.35436e-06	5.39407e-05	ENSMUSG00000032113	chr9	36619778	36638361	protein_coding
Fancg	155.122	-1.18249	0.250531	-4.71994	2.3591e-06	5.39868e-05	ENSMUSG00000028453	chr4	43002343	43010506	protein_coding
Psca	60.088	-1.87212	0.396819	-4.71783	2.38379e-06	5.44889e-05	ENSMUSG00000022598	chr15	74586688	74588918	protein_coding
Rprm	39.9931	-2.05966	0.43661	-4.71739	2.38885e-06	5.45416e-05	ENSMUSG00000075334	chr2	53974105	53975564	protein_coding
Arrb1	700.201	-1.45725	0.308997	-4.71607	2.40442e-06	5.48341e-05	ENSMUSG00000018909	chr7	99184673	99255978	protein_coding
Plk2	2688.33	1.06346	0.225958	4.70646	2.52055e-06	5.70883e-05	ENSMUSG00000021701	chr13	110531580	110537378	protein_coding
Gpt2	1907.63	1.22286	0.259938	4.70445	2.54548e-06	5.75215e-05	ENSMUSG00000031700	chr8	86219205	86254189	protein_coding
Rassf10	201.971	1.18358	0.251634	4.70358	2.55645e-06	5.76737e-05	ENSMUSG00000098132	chr7	112553169	112556664	protein_coding
Phyhip	122.06	-1.45846	0.310082	-4.70345	2.55804e-06	5.76737e-05	ENSMUSG00000003469	chr14	70694916	70706272	protein_coding
Wnt9a	335.178	1.75382	0.37327	4.69854	2.62027e-06	5.89427e-05	ENSMUSG00000000126	chr11	59197754	59224378	protein_coding
Sema6b	186.56	-1.36139	0.290157	-4.69192	2.70656e-06	6.06087e-05	ENSMUSG00000001227	chr17	56430085	56447343	protein_coding
Fgd2	59.7203	-1.89054	0.402992	-4.69125	2.71538e-06	6.0669e-05	ENSMUSG00000024013	chr17	29579888	29598635	protein_coding
Aldh1a7	78.3037	-1.55713	0.332839	-4.67833	2.89222e-06	6.433e-05	ENSMUSG00000024747	chr19	20670317	20704926	protein_coding
Il1rl2	17.9971	2.76864	0.592441	4.67328	2.96422e-06	6.55643e-05	ENSMUSG00000070942	chr1	40363770	40406722	protein_coding
Chaf1b	375.289	-1.38595	0.296984	-4.66676	3.05993e-06	6.75297e-05	ENSMUSG00000022945	chr16	93680789	93703003	protein_coding
Pbx3	117.72	-1.47712	0.31671	-4.66395	3.10198e-06	6.83817e-05	ENSMUSG00000038718	chr2	34061469	34263154	protein_coding
Lrg1	1655.47	-1.47361	0.316015	-4.66312	3.11457e-06	6.85828e-05	ENSMUSG00000037095	chr17	56426678	56429001	protein_coding
Ubash3b	88.6664	-1.51056	0.324025	-4.66187	3.13351e-06	6.89232e-05	ENSMUSG00000032020	chr9	40922394	41072993	protein_coding
Kctd4	40.3831	2.15602	0.46261	4.66055	3.15361e-06	6.92885e-05	ENSMUSG00000046523	chr14	76192449	76203646	protein_coding
A4galt	2099.88	-2.45213	0.526671	-4.6559	3.22576e-06	7.07169e-05	ENSMUSG00000047878	chr15	83110923	83135975	protein_coding
Etnppl	159.687	-1.3321	0.286242	-4.65377	3.25924e-06	7.10955e-05	ENSMUSG00000019232	chr3	130411097	130431170	protein_coding
Fbln5	123.366	1.59727	0.343573	4.64898	3.33577e-06	7.25666e-05	ENSMUSG00000021186	chr12	101712824	101785314	protein_coding
Vldlr	1262.95	1.09256	0.235044	4.6483	3.34676e-06	7.2726e-05	ENSMUSG00000024924	chr19	27193884	27231631	protein_coding
Calb1	22.6764	4.30025	0.925709	4.64536	3.39485e-06	7.36096e-05	ENSMUSG00000028222	chr4	15881264	15908064	protein_coding
Psat1	6019.55	1.42911	0.308189	4.63714	3.53269e-06	7.63478e-05	ENSMUSG00000024640	chr19	15882042	15924701	protein_coding
Kcnk12	327.505	-3.48583	0.751904	-4.63601	3.55202e-06	7.66817e-05	ENSMUSG00000050138	chr17	88053229	88105422	protein_coding
Efcab11	18.1088	-3.61983	0.781161	-4.63392	3.58813e-06	7.72615e-05	ENSMUSG00000021176	chr12	99659304	99850698	protein_coding
E2f8	209.74	-5.04717	1.08932	-4.63334	3.59819e-06	7.73416e-05	ENSMUSG00000046179	chr7	48516177	48531344	protein_coding
Ppp1r14a	5.33647	5.95457	1.2869	4.62707	3.70872e-06	7.95448e-05	ENSMUSG00000037166	chr7	28988733	28993226	protein_coding
Scx	153.454	1.14498	0.247918	4.61838	3.86753e-06	8.25934e-05	ENSMUSG00000034161	chr15	76341652	76343658	protein_coding
Bst1	532.145	1.41353	0.306364	4.61388	3.95224e-06	8.41305e-05	ENSMUSG00000029082	chr5	43976227	44001328	protein_coding
Xkr5	13.1471	-4.60258	0.998675	-4.60869	4.05214e-06	8.57962e-05	ENSMUSG00000039814	chr8	18982745	19000991	protein_coding
Pcsk6	7397.92	-1.2531	0.272081	-4.60562	4.11249e-06	8.66113e-05	ENSMUSG00000030513	chr7	65511482	65700134	protein_coding
Hoxd8	5.1838	5.91405	1.28435	4.6047	4.13062e-06	8.69008e-05	ENSMUSG00000027102	chr2	74534959	74538277	protein_coding
Tenm4	489.561	1.23346	0.267959	4.60316	4.16119e-06	8.73586e-05	ENSMUSG00000048078	chr7	95820453	96560300	protein_coding
Vstm5	423.916	-2.43056	0.528012	-4.60322	4.16003e-06	8.73586e-05	ENSMUSG00000031937	chr9	15150341	15170712	protein_coding
Adgrl1	134.431	-1.42975	0.310743	-4.60108	4.20303e-06	8.79574e-05	ENSMUSG00000013033	chr8	84626734	84668583	protein_coding
Ccdc65	215.097	4.42496	0.96189	4.60027	4.21936e-06	8.82061e-05	ENSMUSG00000003354	chr15	98606088	98621217	protein_coding
Rfesd	213.572	1.29949	0.282801	4.59506	4.32626e-06	8.98719e-05	ENSMUSG00000043190	chr13	76149654	76166838	protein_coding
C3	410192	-1.27413	0.277318	-4.59448	4.33822e-06	9.00259e-05	ENSMUSG00000024164	chr17	57510970	57535136	protein_coding
Ntn5	27.1283	-3.53773	0.770146	-4.59359	4.35689e-06	9.03188e-05	ENSMUSG00000070564	chr7	45333446	45343980	protein_coding
Rpa2	253.984	-1.00137	0.21802	-4.59304	4.36829e-06	9.04605e-05	ENSMUSG00000028884	chr4	132495643	132506063	protein_coding
Dbi	1050.82	-1.01913	0.221897	-4.5928	4.37342e-06	9.04722e-05	ENSMUSG00000026385	chr1	120041010	120048808	protein_coding
Klf15	42.4817	3.16258	0.688828	4.59124	4.40623e-06	9.09611e-05	ENSMUSG00000030087	chr6	90439558	90452220	protein_coding
Gal3st1	191.857	-1.23896	0.26993	-4.58991	4.43427e-06	9.14448e-05	ENSMUSG00000049721	chr11	3933636	3949326	protein_coding
Cacna1d	85.0795	-2.22939	0.486024	-4.587	4.49663e-06	9.25381e-05	ENSMUSG00000015968	chr14	29761896	30213412	protein_coding
Cachd1	6.08454	5.5471	1.21108	4.58027	4.64372e-06	9.52685e-05	ENSMUSG00000028532	chr4	100633872	100886417	protein_coding
Aqp8	12862.2	-2.05031	0.448049	-4.57608	4.73765e-06	9.69946e-05	ENSMUSG00000030762	chr7	123061514	123067227	protein_coding
Mir5125	264.841	-1.2183	0.266251	-4.57574	4.74543e-06	9.70536e-05	ENSMUSG00000092981	chr17	24042265	24042343	miRNA
Slc9a5	90.6823	-1.28522	0.280916	-4.57512	4.75957e-06	9.71423e-05	ENSMUSG00000014786	chr8	106075475	106096513	protein_coding
Eif1ad7	16.3562	-4.60245	1.00623	-4.57394	4.78629e-06	9.74868e-05	ENSMUSG00000079029	chr12	88237410	88241270	protein_coding
Kel	41.224	-2.16441	0.474408	-4.56234	5.05854e-06	0.000101674	ENSMUSG00000029866	chr6	41663264	41681273	protein_coding
E230016M11Rik	59.5934	-2.36581	0.518727	-4.56079	5.09611e-06	0.000102325	ENSMUSG00000087231	chr6	67013583	67057638	lncRNA
Hey1	32.8837	-2.7551	0.604683	-4.55627	5.20694e-06	0.000104023	ENSMUSG00000040289	chr3	8728419	8732316	protein_coding
Zfand2a	1288.29	1.27668	0.280471	4.55193	5.31556e-06	0.00010598	ENSMUSG00000053581	chr5	139456966	139470304	protein_coding
Tesc	44.5359	2.04021	0.448247	4.55154	5.32544e-06	0.00010607	ENSMUSG00000029359	chr5	118165808	118199943	protein_coding
Cyp2s1	742.059	-1.64018	0.360621	-4.54821	5.41034e-06	0.000107545	ENSMUSG00000040703	chr7	25501900	25516338	protein_coding
Efhd1	290.571	1.79921	0.395885	4.54478	5.49939e-06	0.000108845	ENSMUSG00000026255	chr1	87192085	87238561	protein_coding
Coro2a	1812.69	-1.07535	0.23662	-4.54463	5.5032e-06	0.000108845	ENSMUSG00000028337	chr4	46536937	46602202	protein_coding
Gtse1	541.868	-1.40606	0.309843	-4.53797	5.6799e-06	0.000111768	ENSMUSG00000022385	chr15	85743946	85760774	protein_coding
Ihh	81.5596	-2.69299	0.594861	-4.52708	5.98045e-06	0.000117115	ENSMUSG00000006538	chr1	74984474	74990831	protein_coding
Sowaha	20.2832	2.67518	0.591757	4.52075	6.16221e-06	0.000120555	ENSMUSG00000044352	chr11	53367400	53371101	protein_coding
Tcf7l1	639.311	-1.07949	0.239005	-4.51662	6.28332e-06	0.000122562	ENSMUSG00000055799	chr6	72603361	72766237	protein_coding
4930461G14Rik	865.938	-1.05516	0.234019	-4.50885	6.51809e-06	0.000126395	ENSMUSG00000097651	chr9	58362385	58376920	lncRNA
Fads2	602.815	-1.46796	0.325664	-4.50759	6.55681e-06	0.000127021	ENSMUSG00000024665	chr19	10040129	10079110	protein_coding
Ptgs1	1447.02	-1.47062	0.327109	-4.49581	6.93057e-06	0.000132449	ENSMUSG00000047250	chr2	36120438	36142284	protein_coding
Galnt14	29.8414	2.33006	0.51872	4.49195	7.05749e-06	0.000134615	ENSMUSG00000024064	chr17	73800223	74017448	protein_coding
Ada	290.836	-1.14058	0.253963	-4.49113	7.0845e-06	0.000135001	ENSMUSG00000017697	chr2	163568504	163592159	protein_coding
Ly6g2	30.9017	-2.44392	0.54482	-4.48574	7.26609e-06	0.00013793	ENSMUSG00000047728	chr15	75088225	75094510	protein_coding
Zfp874b	88.0392	1.25028	0.278794	4.48461	7.30488e-06	0.000138166	ENSMUSG00000059839	chr13	67619632	67632377	protein_coding
Morn4	33.9236	2.25879	0.504726	4.47529	7.63092e-06	0.000143754	ENSMUSG00000049670	chr19	42063378	42074796	protein_coding
Zfp385a	251.657	-1.11757	0.249758	-4.47461	7.65503e-06	0.000144072	ENSMUSG00000000552	chr15	103222322	103248520	protein_coding
Cfb	488.592	-1.41729	0.317559	-4.46307	8.07932e-06	0.000150768	ENSMUSG00000090231	chr17	35075350	35081494	protein_coding
Gm47694	76.005	-1.2572	0.281845	-4.46059	8.17328e-06	0.000152378	ENSMUSG00000114584	chr14	60448423	60453868	TEC
2810013P06Rik	199.135	1.09502	0.245767	4.45553	8.36851e-06	0.000155871	ENSMUSG00000099881	chr8	123769156	123771349	lncRNA
Pcdhgc4	25.8019	-2.87601	0.646066	-4.45158	8.52415e-06	0.000158057	ENSMUSG00000023036	chr18	37948132	37974926	protein_coding
Agtr2	8.84335	6.68468	1.50263	4.44864	8.6414e-06	0.000159902	ENSMUSG00000068122	chrX	21350783	21355403	protein_coding
Usp35	181.838	-1.03056	0.231648	-4.44883	8.63406e-06	0.000159902	ENSMUSG00000035713	chr7	96958587	96981227	protein_coding
A630052C17Rik	94.6211	1.21646	0.273673	4.44494	8.79173e-06	0.000161928	ENSMUSG00000086725	chr11	29120909	29123558	lncRNA
Nphp4	50.2734	-1.91464	0.431041	-4.4419	8.91692e-06	0.000163679	ENSMUSG00000039577	chr4	152561163	152647640	protein_coding
Aqp4	495.967	-3.68543	0.82991	-4.44075	8.96442e-06	0.000164193	ENSMUSG00000024411	chr18	15522553	15544039	protein_coding
Col4a4	131.9	2.41297	0.543693	4.43811	9.0754e-06	0.000165766	ENSMUSG00000067158	chr1	82426144	82564570	protein_coding
Pcdhgb5	106.009	-1.61519	0.36392	-4.4383	9.06733e-06	0.000165766	ENSMUSG00000103749	chr18	37864062	37974926	protein_coding
Syt16	88.1523	-2.03133	0.457844	-4.43672	9.13379e-06	0.000166526	ENSMUSG00000044912	chr12	74044435	74320041	protein_coding
Gm19696	21.7887	-2.2841	0.51488	-4.43617	9.15731e-06	0.000166648	ENSMUSG00000117485	chr17	84441432	84463868	lncRNA
mt-Nd3	283.102	-1.79215	0.404555	-4.42992	9.42669e-06	0.00017086	ENSMUSG00000064360	chrM	9459	9806	protein_coding
Diaph3	264.01	-1.73392	0.391544	-4.42842	9.49279e-06	0.000171806	ENSMUSG00000022021	chr14	86892803	87378671	protein_coding
Plod1	2053.62	-1.17545	0.265524	-4.42692	9.55891e-06	0.000172688	ENSMUSG00000019055	chr4	147994210	148021224	protein_coding
Pycr1	616.276	1.3095	0.295861	4.42606	9.5968e-06	0.000173214	ENSMUSG00000025140	chr11	120526538	120534595	protein_coding
Kctd12	54.9508	1.59032	0.359435	4.4245	9.66672e-06	0.000173843	ENSMUSG00000098557	chr14	103214017	103220073	protein_coding
Slitrk2	12.3147	-3.8056	0.860618	-4.42194	9.78191e-06	0.00017512	ENSMUSG00000036790	chrX	65692924	65704999	protein_coding
Thbs2	423.233	-2.38222	0.538757	-4.4217	9.79287e-06	0.000175158	ENSMUSG00000023885	chr17	14885762	14914497	protein_coding
Nos1ap	302.203	-1.19639	0.270849	-4.4172	9.99867e-06	0.000178036	ENSMUSG00000038473	chr1	170130237	170417430	protein_coding
Adk	809.816	1.00638	0.228002	4.41389	1.01529e-05	0.000180457	ENSMUSG00000039197	chr14	21102642	21498637	protein_coding
Col6a3	49.2666	-4.8358	1.09609	-4.41186	1.02487e-05	0.000181671	ENSMUSG00000048126	chr1	90693645	90771693	protein_coding
Gm45114	46.6258	-1.51583	0.344357	-4.40192	1.07298e-05	0.000189353	ENSMUSG00000109136	chr7	19494831	19496179	TEC
Nudt19	1211.86	1.12474	0.255526	4.40165	1.0743e-05	0.000189418	ENSMUSG00000034875	chr7	35246610	35255729	protein_coding
Pkd2l1	155.468	-1.4498	0.329455	-4.4006	1.07951e-05	0.000190167	ENSMUSG00000037578	chr19	44136076	44180881	protein_coding
Rpl5	22601.4	1.07743	0.245422	4.3901	1.13297e-05	0.000197826	ENSMUSG00000058558	chr5	108048368	108056871	protein_coding
Gnpda2	518.812	1.0616	0.24192	4.38825	1.14268e-05	0.000199281	ENSMUSG00000029209	chr5	69730451	69749683	protein_coding
Sprr2a2	39.7047	-2.2952	0.523054	-4.38807	1.14363e-05	0.000199281	ENSMUSG00000068893	chr3	92123227	92164031	protein_coding
Pdzrn3	347.381	1.41578	0.322682	4.38753	1.14645e-05	0.000199477	ENSMUSG00000035357	chr6	101126570	101354858	protein_coding
Platr16	10.8099	5.25466	1.2004	4.37744	1.20081e-05	0.000208021	ENSMUSG00000085101	chr4	145136815	145176326	lncRNA
Nxnl2	5.67995	5.44195	1.2439	4.37493	1.21474e-05	0.000209701	ENSMUSG00000021396	chr13	51325058	51329224	protein_coding
Icosl	388.462	-1.06567	0.243637	-4.37401	1.21984e-05	0.000209851	ENSMUSG00000000732	chr10	77905136	77919747	protein_coding
Lgals3bp	6933.78	-1.23137	0.281509	-4.37418	1.21889e-05	0.000209851	ENSMUSG00000033880	chr11	118283577	118292918	protein_coding
Fgf5	6.54611	5.6496	1.29303	4.36927	1.24663e-05	0.000213902	ENSMUSG00000029337	chr5	98402043	98424889	protein_coding
Phf19	41.6294	-2.33859	0.535563	-4.36661	1.26191e-05	0.000215854	ENSMUSG00000026873	chr2	34783769	34804038	protein_coding
Dusp4	900	1.54193	0.353249	4.36499	1.27126e-05	0.000217001	ENSMUSG00000031530	chr8	35274451	35287048	protein_coding
Hcrtr1	25.6386	-2.69469	0.6183	-4.35823	1.3112e-05	0.000222668	ENSMUSG00000028778	chr4	130024010	130033152	protein_coding
Nupr1	7659.39	1.22363	0.281101	4.35299	1.34296e-05	0.000227088	ENSMUSG00000030717	chr7	126222421	126230033	protein_coding
Ecscr	68.33	2.49208	0.573081	4.34856	1.37037e-05	0.000231328	ENSMUSG00000073599	chr18	35846139	35855409	protein_coding
Slc36a2	5.15137	-5.74645	1.32156	-4.34823	1.37244e-05	0.00023148	ENSMUSG00000020264	chr11	55049296	55075903	protein_coding
Anxa10	105.479	2.2544	0.518579	4.34727	1.37845e-05	0.000232298	ENSMUSG00000031635	chr8	62510076	62576184	protein_coding
Amz1	44.7232	2.03292	0.468169	4.34228	1.4101e-05	0.000236624	ENSMUSG00000050022	chr5	140709882	140747194	protein_coding
Zfp472	196.047	1.17488	0.270626	4.34136	1.41605e-05	0.000237021	ENSMUSG00000053600	chr17	33184788	33198207	protein_coding
Bmp5	5.80481	6.07364	1.39908	4.34116	1.41735e-05	0.000237039	ENSMUSG00000032179	chr9	75682646	75807592	protein_coding
Rps7	21616.6	1.25516	0.289144	4.34094	1.41872e-05	0.000237068	ENSMUSG00000061477	chr12	28680853	28685952	protein_coding
Wdr76	246.897	-1.08988	0.251273	-4.33744	1.44153e-05	0.000240473	ENSMUSG00000027242	chr2	121337204	121375341	protein_coding
Spock2	84.1801	-1.57575	0.363345	-4.3368	1.44574e-05	0.000240973	ENSMUSG00000058297	chr10	59942041	59971020	protein_coding
Cyb5r2	26.8058	2.84641	0.656562	4.33532	1.45545e-05	0.000242184	ENSMUSG00000048065	chr7	107347662	107357239	protein_coding
Rnf157	91.5822	-1.61017	0.37158	-4.3333	1.4689e-05	0.000244217	ENSMUSG00000052949	chr11	116227179	116303858	protein_coding
Gbp9	75.5605	2.31611	0.535102	4.32835	1.5023e-05	0.000248651	ENSMUSG00000029298	chr5	105225496	105287405	protein_coding
Pfkfb4	143.988	-1.08379	0.250528	-4.32603	1.51823e-05	0.000250111	ENSMUSG00000025648	chr9	108820846	108861296	protein_coding
Erfe	110.32	-1.26792	0.293286	-4.32315	1.53816e-05	0.000253184	ENSMUSG00000047443	chr1	91294152	91301939	protein_coding
Tiam1	372.954	-1.34699	0.311628	-4.32243	1.5432e-05	0.000253592	ENSMUSG00000002489	chr16	89583999	89940657	protein_coding
Mtfr2	39.0974	-2.46457	0.571591	-4.31178	1.61948e-05	0.000264591	ENSMUSG00000019992	chr10	20223516	20237050	protein_coding
Tmprss11a	32.7166	2.46559	0.571852	4.31159	1.62085e-05	0.000264596	ENSMUSG00000072845	chr5	86558269	86616849	protein_coding
Dleu7	45.0965	2.75451	0.638975	4.31082	1.62648e-05	0.000265297	ENSMUSG00000048281	chr14	62513680	62530496	protein_coding
Rps24	13797.7	1.16493	0.270456	4.3073	1.65261e-05	0.000269338	ENSMUSG00000025290	chr14	24537193	24547027	protein_coding
Lhfpl2	377.507	1.73883	0.403745	4.30676	1.65661e-05	0.000269768	ENSMUSG00000045312	chr13	94194304	94331917	protein_coding
Mamld1	146.033	1.16998	0.271722	4.30579	1.66389e-05	0.000270508	ENSMUSG00000059401	chrX	70093846	70199662	protein_coding
Trip13	124.888	-1.19954	0.279148	-4.29713	1.73027e-05	0.000279167	ENSMUSG00000021569	chr13	74059466	74085903	protein_coding
Krt17	143.431	4.00584	0.932785	4.2945	1.7509e-05	0.000281651	ENSMUSG00000035557	chr11	100147043	100151855	protein_coding
Gm14326	98.769	1.24567	0.290508	4.28791	1.80359e-05	0.00028872	ENSMUSG00000078862	chr2	177577786	177599090	protein_coding
Gstt1	78.9582	-1.78345	0.416569	-4.28128	1.85819e-05	0.000295077	ENSMUSG00000001663	chr10	75619647	75634418	protein_coding
Rragd	66.3542	2.25328	0.526379	4.28072	1.86292e-05	0.000295591	ENSMUSG00000028278	chr4	32983037	33022180	protein_coding
Sytl2	17.2542	3.36414	0.786086	4.27961	1.87224e-05	0.000296595	ENSMUSG00000030616	chr7	89951460	90059927	protein_coding
Eif4e3	50.1515	2.01139	0.470176	4.27796	1.88616e-05	0.000298085	ENSMUSG00000093661	chr6	99602096	99643732	protein_coding
Krt84	34.5191	-2.71694	0.635165	-4.27753	1.88981e-05	0.000298425	ENSMUSG00000044294	chr15	101433461	101441255	protein_coding
Eif1ad10	21.2437	-2.74155	0.64158	-4.27313	1.92748e-05	0.000303406	ENSMUSG00000095799	chr12	88215508	88219640	protein_coding
mt-Tg	30.2247	-2.91502	0.682813	-4.26913	1.9624e-05	0.00030768	ENSMUSG00000064359	chrM	9391	9458	Mt_tRNA
Aox3	52.7966	3.31622	0.776926	4.26838	1.96899e-05	0.000308226	ENSMUSG00000064294	chr1	58152289	58239857	protein_coding
Wdr62	54.2648	-2.16594	0.507664	-4.26649	1.98574e-05	0.000310602	ENSMUSG00000037020	chr7	29939563	29979844	protein_coding
Cdc7	65.1145	-1.95182	0.457601	-4.26533	1.99605e-05	0.000311724	ENSMUSG00000029283	chr5	107112188	107132298	protein_coding
Ifi211	180.979	1.26147	0.29607	4.26073	2.03761e-05	0.000316964	ENSMUSG00000026536	chr1	173723911	173740612	protein_coding
Efcab12	23.9161	-1.78854	0.421054	-4.24777	2.15908e-05	0.000331438	ENSMUSG00000030321	chr6	115787690	115815373	protein_coding
Rgs16	582.136	1.38747	0.327069	4.24212	2.21417e-05	0.000338061	ENSMUSG00000026475	chr1	153616095	153621214	protein_coding
Acap1	42.0267	-1.75729	0.414891	-4.23553	2.28013e-05	0.000346	ENSMUSG00000001588	chr11	69772393	69786365	protein_coding
Adrb1	72.6046	1.63062	0.385059	4.23473	2.2883e-05	0.000346975	ENSMUSG00000035283	chr19	56710631	56721545	protein_coding
Adamts13	6.56569	-4.89688	1.15667	-4.2336	2.29979e-05	0.000347966	ENSMUSG00000014852	chr2	26863428	26899640	protein_coding
Slc22a17	322.895	-1.31006	0.309622	-4.23115	2.32499e-05	0.000350926	ENSMUSG00000022199	chr14	55143761	55150589	protein_coding
Zfp958	248.177	1.24077	0.293356	4.22957	2.34138e-05	0.00035259	ENSMUSG00000058748	chr8	4663167	4680231	protein_coding
Gstm6	13.3991	-4.09826	0.969328	-4.22794	2.35844e-05	0.000354355	ENSMUSG00000068762	chr3	107846163	107851065	protein_coding
Dkk3	41.3386	2.24386	0.530869	4.22677	2.37075e-05	0.000355935	ENSMUSG00000030772	chr7	111715224	111758264	protein_coding
Lepr	390.33	1.02342	0.242263	4.22441	2.39566e-05	0.000358415	ENSMUSG00000057722	chr4	101574601	101672549	protein_coding
Naaa	1765.89	-1.09551	0.259343	-4.22415	2.39839e-05	0.000358415	ENSMUSG00000029413	chr5	92405518	92426029	protein_coding
Stox2	164.099	1.39226	0.330156	4.21699	2.47589e-05	0.000368926	ENSMUSG00000038143	chr8	47633083	47899397	protein_coding
Asns	5980.87	2.29055	0.543372	4.21543	2.49304e-05	0.000370924	ENSMUSG00000029752	chr6	7675169	7693254	protein_coding
Sgk1	1969.56	1.00789	0.239214	4.21335	2.51609e-05	0.000373512	ENSMUSG00000019970	chr10	21758083	21875802	protein_coding
Pcsk9	57.1103	-1.44823	0.343799	-4.21242	2.5265e-05	0.000374776	ENSMUSG00000044254	chr4	106299526	106321526	protein_coding
Gm17334	13.2232	-3.11306	0.739217	-4.21129	2.53916e-05	0.000376092	ENSMUSG00000091191	chr11	53660878	53664021	TEC
Plekhd1	42.1128	-2.65585	0.631309	-4.20689	2.58906e-05	0.000382911	ENSMUSG00000066438	chr12	80739365	80770988	protein_coding
Slc39a4	9481.86	-1.06452	0.253176	-4.20467	2.61462e-05	0.000386115	ENSMUSG00000063354	chr15	76496583	76501584	protein_coding
Amigo3	99.3765	-1.01677	0.242169	-4.19861	2.68553e-05	0.000394528	ENSMUSG00000032593	chr9	107930358	107932900	protein_coding
Slc1a4	2132.91	1.15289	0.274849	4.19463	2.73318e-05	0.00039975	ENSMUSG00000020142	chr11	20252180	20282713	protein_coding
Tnfrsf18	58.0439	-1.74645	0.416347	-4.19469	2.73241e-05	0.00039975	ENSMUSG00000041954	chr4	156110621	156113352	protein_coding
Napepld	691.246	-1.2893	0.307419	-4.19396	2.74127e-05	0.000400342	ENSMUSG00000044968	chr5	21867899	21906394	protein_coding
Uroc1	32.3953	-3.68476	0.879187	-4.1911	2.77608e-05	0.000404829	ENSMUSG00000034456	chr6	90310266	90341533	protein_coding
Dhrs3	381.008	1.34156	0.320138	4.19056	2.78267e-05	0.000405385	ENSMUSG00000066026	chr4	144619397	144654779	protein_coding
Rad51c	41.4301	-1.52273	0.363409	-4.19012	2.78806e-05	0.000405681	ENSMUSG00000007646	chr11	87267471	87295780	protein_coding
Akr1c19	363.986	-1.50281	0.358698	-4.18962	2.79422e-05	0.00040628	ENSMUSG00000071551	chr13	4278699	4302842	protein_coding
Gm37087	53.5061	-2.17745	0.520518	-4.18324	2.87381e-05	0.000416934	ENSMUSG00000103187	chr3	92150240	92153548	TEC
Tstd3	59.12	-1.38049	0.330131	-4.18163	2.89425e-05	0.000419593	ENSMUSG00000028251	chr4	21757382	21767212	protein_coding
Fam171a2	2026.38	-1.18366	0.28309	-4.18122	2.89955e-05	0.000420054	ENSMUSG00000034685	chr11	102327807	102338508	protein_coding
P2ry1	51.3541	1.69286	0.405124	4.17863	2.93265e-05	0.00042361	ENSMUSG00000027765	chr3	60910216	60916403	protein_coding
Oxtr	200.548	-1.82937	0.437877	-4.17782	2.94316e-05	0.000424509	ENSMUSG00000049112	chr6	112450644	112466904	protein_coding
Vsnl1	67.692	-2.37351	0.568657	-4.17388	2.99453e-05	0.00043129	ENSMUSG00000054459	chr12	11375243	11486614	protein_coding
Map3k15	178.366	1.02906	0.246592	4.17315	3.00421e-05	0.000432057	ENSMUSG00000031303	chrX	158771429	158906347	protein_coding
Plag1	56.1947	2.38158	0.570901	4.17161	3.02456e-05	0.000434669	ENSMUSG00000003282	chr4	3900996	3938423	protein_coding
Gm17276	111.023	-1.31224	0.314606	-4.17106	3.03187e-05	0.000435403	ENSMUSG00000097305	chr17	32332385	32360817	lncRNA
Col26a1	42.6825	3.09465	0.744525	4.15654	3.23105e-05	0.000459018	ENSMUSG00000004415	chr5	136770613	136912063	protein_coding
Tmem154	260.998	1.66561	0.401104	4.15257	3.28767e-05	0.000466393	ENSMUSG00000056498	chr3	84573499	84611882	protein_coding
1700016C15Rik	119.416	-1.03991	0.25087	-4.14521	3.39505e-05	0.000478202	ENSMUSG00000015962	chr1	177557380	177580890	protein_coding
Rpl26	14612.8	1.11442	0.26904	4.14221	3.43977e-05	0.00048347	ENSMUSG00000060938	chr11	68792409	68797815	protein_coding
Rbms3	188.598	1.00462	0.242587	4.14127	3.45391e-05	0.000484427	ENSMUSG00000039607	chr9	116401814	117701749	protein_coding
Cdkn3	29.975	-3.06267	0.739708	-4.14038	3.46738e-05	0.000485972	ENSMUSG00000037628	chr14	46997998	47009126	protein_coding
Tpi-rs11	46.4329	-1.24523	0.300926	-4.138	3.50345e-05	0.000490334	ENSMUSG00000106755	chr6	127160372	127160681	processed_pseudogene
Gas7	807.621	-1.17536	0.284137	-4.13661	3.52476e-05	0.000492968	ENSMUSG00000033066	chr11	67345917	67575800	protein_coding
Robo1	397.731	-1.1607	0.280681	-4.1353	3.54498e-05	0.000494749	ENSMUSG00000022883	chr16	72105194	72842983	protein_coding
Ldha-ps2	36.1462	-1.81156	0.438113	-4.1349	3.55104e-05	0.000495246	ENSMUSG00000083836	chr4	119191586	119192642	processed_pseudogene
Maff	1850.14	1.23216	0.298095	4.13344	3.57375e-05	0.000498063	ENSMUSG00000042622	chr15	79230821	79243276	protein_coding
Atad5	127.388	-1.07934	0.261227	-4.13182	3.59907e-05	0.000500887	ENSMUSG00000017550	chr11	79980226	80026620	protein_coding
Irs2	34.4456	3.15098	0.762883	4.13036	3.62197e-05	0.000503367	ENSMUSG00000038894	chr8	11034681	11058458	protein_coding
Rpl17-ps3	102.316	1.1706	0.283742	4.12558	3.69795e-05	0.000511773	ENSMUSG00000113948	chr12	67557530	67558085	processed_pseudogene
Atf7ip2	4.16894	-5.4447	1.31965	-4.12588	3.69324e-05	0.000511773	ENSMUSG00000039200	chr16	10010576	10069342	protein_coding
Ddx11	366.361	-1.03175	0.250114	-4.12512	3.70543e-05	0.00051245	ENSMUSG00000035842	chr17	66430515	66459169	protein_coding
Gm47283	2132.12	-1.38136	0.335232	-4.12059	3.77901e-05	0.000521535	ENSMUSG00000096768	chrY	90796007	90827734	lncRNA
Marchf10	4.39755	-5.52324	1.3405	-4.12029	3.78397e-05	0.000521856	ENSMUSG00000078627	chr11	105251624	105347561	protein_coding
Adamtsl4	1042.22	-1.33696	0.324546	-4.11948	3.79721e-05	0.000523318	ENSMUSG00000015850	chr3	95583511	95595228	protein_coding
Mab21l4	723.345	1.16269	0.282502	4.1157	3.86008e-05	0.000529772	ENSMUSG00000034159	chr1	93079071	93088670	protein_coding
Gm33195	11.8237	-2.62191	0.637238	-4.11449	3.88045e-05	0.000532198	ENSMUSG00000113780	chr13	44018145	44022065	lncRNA
Zfp709	183.637	1.09527	0.266872	4.1041	4.05894e-05	0.000553995	ENSMUSG00000056019	chr8	72635863	72649571	protein_coding
Prdm9	145.73	-1.16192	0.283384	-4.10015	4.12877e-05	0.000561977	ENSMUSG00000051977	chr17	15763341	15784616	protein_coding
Melk	646.213	-1.31732	0.321581	-4.09639	4.19649e-05	0.000569631	ENSMUSG00000035683	chr4	44300876	44364675	protein_coding
Gm16008	52.172	-1.50927	0.368543	-4.09524	4.21735e-05	0.000571288	ENSMUSG00000087381	chr4	156106465	156116120	lncRNA
Smim31	99.1876	-1.84659	0.451012	-4.09431	4.2342e-05	0.000573046	ENSMUSG00000074300	chr8	65538265	65582215	protein_coding
Sfxn5	82.9243	-1.16145	0.283843	-4.09186	4.2793e-05	0.000577312	ENSMUSG00000033720	chr6	85190031	85310404	protein_coding
A730020M07Rik	169.143	-1.28678	0.314495	-4.09158	4.2844e-05	0.000577606	ENSMUSG00000044522	chr3	121428585	121437134	lncRNA
Trpc6	5.53578	-5.85396	1.43107	-4.09061	4.30235e-05	0.000579632	ENSMUSG00000031997	chr9	8544143	8680742	protein_coding
Ptpn22	618.468	1.29275	0.316276	4.08741	4.3621e-05	0.000585296	ENSMUSG00000027843	chr3	103767111	103819563	protein_coding
Adamts5	329.545	2.38721	0.584769	4.08232	4.45887e-05	0.000596072	ENSMUSG00000022894	chr16	85653061	85698716	protein_coding
Slc6a9	1624.02	1.18409	0.290069	4.08208	4.46347e-05	0.000596072	ENSMUSG00000028542	chr4	117691703	117732395	protein_coding
Tpt1	67031	1.00576	0.24671	4.07668	4.56837e-05	0.000607217	ENSMUSG00000060126	chr14	76082533	76085965	protein_coding
Pgam1-ps2	68.6459	-1.49387	0.366434	-4.07679	4.56621e-05	0.000607217	ENSMUSG00000082016	chr7	27169196	27169960	processed_pseudogene
Rps27	6418.05	1.14962	0.282174	4.07416	4.61807e-05	0.000613	ENSMUSG00000090733	chr3	90119829	90120958	protein_coding
Aldh18a1	4252	1.08239	0.266301	4.06453	4.81293e-05	0.000632092	ENSMUSG00000025007	chr19	40538701	40576907	protein_coding
Gm52981	124.822	-1.29436	0.318625	-4.06231	4.85893e-05	0.000636867	ENSMUSG00000118086	chr19	21098516	21225815	lncRNA
Gm4610	237.863	-1.41775	0.349203	-4.05995	4.90826e-05	0.000642908	ENSMUSG00000104554	chr3	122170746	122185655	lncRNA
Gm35333	14.6679	-2.43465	0.599722	-4.05964	4.91487e-05	0.000643348	ENSMUSG00000114274	chr13	60570570	60582545	lncRNA
Comp	20.1116	4.23624	1.04628	4.04886	5.14668e-05	0.000671473	ENSMUSG00000031849	chr8	70826208	70834716	protein_coding
Ifi202b	529.345	1.56971	0.388077	4.04485	5.23561e-05	0.000682178	ENSMUSG00000026535	chr1	173790134	173810310	protein_coding
mt-Tl2	149.029	-1.71081	0.423642	-4.03833	5.38328e-05	0.000698102	ENSMUSG00000064366	chrM	11671	11741	Mt_tRNA
Prr9	6.31585	-4.83461	1.19732	-4.03785	5.39438e-05	0.00069873	ENSMUSG00000056270	chr3	92029511	92031254	protein_coding
Kcnq5	56.5684	1.18559	0.293735	4.03626	5.43106e-05	0.000703022	ENSMUSG00000028033	chr1	21468627	22032166	protein_coding
Gm37752	125.896	-1.44729	0.358688	-4.03496	5.46124e-05	0.000706468	ENSMUSG00000103385	chr3	92185032	92188340	TEC
Sox11	68.9408	1.86492	0.462255	4.03439	5.47436e-05	0.000707242	ENSMUSG00000063632	chr12	27384263	27392573	protein_coding
Pcdhga11	15.4093	3.29342	0.817107	4.03058	5.56396e-05	0.000717881	ENSMUSG00000102742	chr18	37888784	37974926	protein_coding
Kndc1	34.9095	-1.82526	0.453143	-4.02799	5.62548e-05	0.000724553	ENSMUSG00000066129	chr7	139474612	139521450	protein_coding
Bco2	42.0372	-2.18114	0.541741	-4.02617	5.66932e-05	0.000729576	ENSMUSG00000032066	chr9	50444387	50466481	protein_coding
Bnc2	66.1509	1.70368	0.42333	4.02448	5.7101e-05	0.000733395	ENSMUSG00000028487	chr4	84193332	84593512	protein_coding
Gm13398	177.632	-2.67648	0.665032	-4.02459	5.7075e-05	0.000733395	ENSMUSG00000087364	chr2	26927297	26930865	protein_coding
Gm43608	14.4143	-3.2545	0.809108	-4.02233	5.76251e-05	0.000739167	ENSMUSG00000106036	chr3	121495150	121503895	lncRNA
Cenpk	31.1349	-2.04807	0.51014	-4.01473	5.95144e-05	0.000760939	ENSMUSG00000021714	chr13	104365119	104388900	protein_coding
Cuzd1	91.8879	-5.15364	1.28392	-4.01399	5.97e-05	0.000762329	ENSMUSG00000040205	chr7	130910283	130924021	protein_coding
2610307P16Rik	37.3227	1.81087	0.451426	4.01143	6.03515e-05	0.000769161	ENSMUSG00000085936	chr13	28614558	29069613	lncRNA
Steap1	1330.36	-1.26036	0.314627	-4.00589	6.17841e-05	0.000785399	ENSMUSG00000015652	chr5	5786317	5799326	protein_coding
Sprr2e	22.2568	-2.42866	0.606379	-4.00518	6.19701e-05	0.000786962	ENSMUSG00000055030	chr3	92259450	92260756	protein_coding
Zfp945	234.745	1.1325	0.282818	4.00435	6.21883e-05	0.000787737	ENSMUSG00000059142	chr17	23065671	23086108	protein_coding
F420014N23Rik	37.3793	-1.53395	0.383285	-4.00212	6.27764e-05	0.000794446	ENSMUSG00000097331	chr10	127031118	127038512	lncRNA
Rpl34	7116.52	1.07044	0.267652	3.99936	6.35131e-05	0.000802744	ENSMUSG00000062006	chr3	130520480	130524047	protein_coding
Tmem266	439.717	-1.32947	0.332601	-3.9972	6.40949e-05	0.000807592	ENSMUSG00000032313	chr9	55234197	55345629	protein_coding
Gm45776	21.7646	-2.94316	0.736336	-3.99703	6.41412e-05	0.000807592	ENSMUSG00000110520	chr8	118439309	118440830	TEC
Stk17b	144.059	1.0127	0.253404	3.9964	6.43138e-05	0.000808738	ENSMUSG00000026094	chr1	53794665	53824383	protein_coding
Cldn2	582.793	3.04824	0.763014	3.995	6.46948e-05	0.000812498	ENSMUSG00000047230	chrX	138701577	138712135	protein_coding
Gpx3	3642.65	1.25483	0.31455	3.98929	6.62716e-05	0.000829148	ENSMUSG00000018339	chr11	54793279	54801203	protein_coding
Tcaf2	273.354	1.01705	0.255095	3.98695	6.69289e-05	0.000835263	ENSMUSG00000029851	chr6	42599950	42622188	protein_coding
Rinl	190.504	-1.25728	0.316717	-3.96972	7.19562e-05	0.000890154	ENSMUSG00000051735	chr7	28488394	28498388	protein_coding
Gm49911	28.1271	-1.86522	0.47032	-3.96585	7.31348e-05	0.000899681	ENSMUSG00000117219	chr17	24032188	24032474	processed_pseudogene
Abi3bp	18.7697	-3.82868	0.966019	-3.96336	7.39013e-05	0.000908546	ENSMUSG00000035258	chr16	56298241	56510498	protein_coding
Ddo	61.2625	1.36457	0.344369	3.96252	7.41617e-05	0.000911181	ENSMUSG00000063428	chr10	40506007	40557843	protein_coding
Nckap1l	10.3491	-5.5727	1.40641	-3.96236	7.4212e-05	0.000911235	ENSMUSG00000022488	chr15	103362221	103407237	protein_coding
Slc25a42	343.454	-1.05206	0.265664	-3.9601	7.4918e-05	0.000918766	ENSMUSG00000002346	chr8	70636990	70664955	protein_coding
Ifit1	39.2801	2.50847	0.633766	3.95804	7.5567e-05	0.000922872	ENSMUSG00000034459	chr19	34618271	34627409	protein_coding
Vmn1r53	5.45697	5.98842	1.51307	3.95778	7.56494e-05	0.000923165	ENSMUSG00000057697	chr6	90200299	90201420	protein_coding
Gng12	37870.1	-1.25951	0.31864	-3.95275	7.7258e-05	0.000938749	ENSMUSG00000036402	chr6	66873381	66998334	protein_coding
Ciart	157.378	1.19107	0.301386	3.95197	7.75102e-05	0.000941236	ENSMUSG00000038550	chr3	95785815	95789563	protein_coding
Grin1	108.77	-2.03994	0.516866	-3.94674	7.92215e-05	0.000958878	ENSMUSG00000026959	chr2	25181193	25209199	protein_coding
Lockd	4.65975	-5.60661	1.42059	-3.94667	7.92466e-05	0.000958878	ENSMUSG00000098318	chr6	134906055	134933761	lncRNA
Gm13814	6.55733	-4.30438	1.09118	-3.94471	7.98959e-05	0.000965473	ENSMUSG00000085261	chr2	92314164	92360164	lncRNA
Gm2999	52.9668	-1.47779	0.37471	-3.94382	8.01928e-05	0.000968471	ENSMUSG00000115868	chr15	71666419	71666956	processed_pseudogene
St6galnac2	49.1679	-1.72904	0.438623	-3.94197	8.08166e-05	0.000974224	ENSMUSG00000110170	chr11	116568309	116572116	protein_coding
Aunip	19.6702	-2.62181	0.666048	-3.93637	8.27234e-05	0.000993583	ENSMUSG00000078521	chr4	134238310	134251238	protein_coding
Meltf	70.0731	-1.457	0.370182	-3.9359	8.28852e-05	0.000994924	ENSMUSG00000022780	chr16	31697628	31717838	protein_coding
Pik3cg	146.139	-1.28255	0.325881	-3.93564	8.29757e-05	0.000995407	ENSMUSG00000020573	chr12	32223472	32258658	protein_coding
Pcsk4	187.807	-1.11444	0.283791	-3.92697	8.6021e-05	0.00102511	ENSMUSG00000020131	chr10	80157117	80165332	protein_coding
Adig	26.7051	2.4845	0.632736	3.92659	8.61577e-05	0.00102613	ENSMUSG00000044405	chr2	158344532	158350118	protein_coding
Fstl1	7.61567	4.73314	1.20582	3.92526	8.66349e-05	0.00103119	ENSMUSG00000022816	chr16	37597235	37656876	protein_coding
Pbx4	27.3361	-1.59109	0.405906	-3.91985	8.86045e-05	0.00104896	ENSMUSG00000031860	chr8	70285141	70324942	protein_coding
Gins2	118.11	-1.20929	0.30862	-3.91837	8.91512e-05	0.0010542	ENSMUSG00000031821	chr8	121305372	121316043	protein_coding
Calcrl	11.2347	2.76309	0.705328	3.91745	8.94906e-05	0.00105693	ENSMUSG00000059588	chr2	84160970	84255755	protein_coding
Fabp2	35.3006	-1.9586	0.500009	-3.91713	8.96092e-05	0.0010577	ENSMUSG00000023057	chr3	122688721	122693155	protein_coding
Fancb	62.3904	-1.1504	0.293803	-3.91553	9.02072e-05	0.00106412	ENSMUSG00000047757	chrX	163763588	163780268	protein_coding
St3gal2	114.062	1.33332	0.34062	3.91439	9.06344e-05	0.00106662	ENSMUSG00000031749	chr8	111646554	111699112	protein_coding
Ptges3l	43.4925	-1.26675	0.323742	-3.91283	9.1222e-05	0.00107213	ENSMUSG00000097487	chr11	101309638	101316159	protein_coding
Gm26671	18.86	3.49912	0.894637	3.91122	9.18309e-05	0.00107624	ENSMUSG00000097339	chr3	57520118	57533245	lncRNA
Gm7932	66.9571	-2.12413	0.543261	-3.90996	9.23121e-05	0.00107932	ENSMUSG00000108084	chr6	48837263	48843049	lncRNA
Bmyc	613.628	-1.20103	0.30734	-3.90783	9.31287e-05	0.00108651	ENSMUSG00000049086	chr2	25596751	25597733	protein_coding
Proc	63.6536	-1.58747	0.406453	-3.90567	9.39647e-05	0.00109412	ENSMUSG00000024386	chr18	32256179	32272623	protein_coding
Gm14023	57.5624	-1.50045	0.384549	-3.90183	9.54689e-05	0.00110828	ENSMUSG00000085498	chr2	129139285	129149746	lncRNA
Adora1	302.663	1.1084	0.284121	3.90115	9.57378e-05	0.0011102	ENSMUSG00000042429	chr1	134126961	134163169	protein_coding
Aqp2	9.96739	-3.88561	0.996859	-3.89785	9.70492e-05	0.00112018	ENSMUSG00000023013	chr15	99476936	99482428	protein_coding
Lifr	1556.78	-1.07701	0.276494	-3.89525	9.80959e-05	0.00113093	ENSMUSG00000054263	chr15	7120095	7226970	protein_coding
Galnt6	16.1692	-2.84079	0.729687	-3.89316	9.89471e-05	0.00113875	ENSMUSG00000037280	chr15	100589694	100627257	protein_coding
Fam169a	11.5998	2.88521	0.741476	3.89117	9.97602e-05	0.00114721	ENSMUSG00000041817	chr13	97203794	97267521	protein_coding
BC002059	162.031	1.00348	0.258047	3.88876	0.000100759	0.00115759	ENSMUSG00000060149	chr17	17171801	17194425	lncRNA
Krt83	25.9164	-3.0081	0.774132	-3.88577	0.000102005	0.00116919	ENSMUSG00000067613	chr15	101383011	101389393	protein_coding
Lims2	32.4956	2.89771	0.746914	3.87958	0.000104639	0.00119317	ENSMUSG00000024395	chr18	32055343	32091672	protein_coding
Ints6l	28.2157	1.94484	0.5015	3.87805	0.000105299	0.00120001	ENSMUSG00000035967	chrX	55500217	55553203	protein_coding
Mei4	95.7088	4.26262	1.09934	3.87744	0.000105561	0.00120161	ENSMUSG00000043289	chr9	81745723	82088060	protein_coding
Cpeb1	86.2574	1.40749	0.363324	3.87393	0.000107094	0.00121697	ENSMUSG00000025586	chr7	80996774	81105213	protein_coding
Fam83d	93.4166	-3.22399	0.832367	-3.87328	0.00010738	0.00121901	ENSMUSG00000027654	chr2	158610013	158628557	protein_coding
Chst1	14.319	-3.04988	0.787625	-3.87225	0.000107837	0.00122331	ENSMUSG00000027221	chr2	92430052	92445595	protein_coding
Tubb2b	1216.87	1.12191	0.289813	3.87114	0.000108328	0.00122747	ENSMUSG00000045136	chr13	34310731	34314449	protein_coding
Kif1a	146.913	1.72342	0.445568	3.86791	0.000109771	0.00123815	ENSMUSG00000014602	chr1	92943186	93029673	protein_coding
Ror2	497.915	-1.2892	0.333709	-3.86323	0.000111897	0.00125784	ENSMUSG00000021464	chr13	53263348	53440160	protein_coding
Bpi	3.63409	-5.24564	1.35789	-3.86307	0.000111969	0.00125794	ENSMUSG00000052922	chr2	158100014	158126451	protein_coding
Dlg2	14.1295	4.34396	1.12693	3.85468	0.000115882	0.00129749	ENSMUSG00000052572	chr7	90125880	92098455	protein_coding
Rps12	14200.4	1.07204	0.278256	3.8527	0.00011682	0.00130578	ENSMUSG00000061983	chr10	23661081	23663173	protein_coding
Col2a1	14.4477	-3.37405	0.876474	-3.84958	0.000118323	0.00132034	ENSMUSG00000022483	chr15	97873483	97902576	protein_coding
Nfil3	1302.88	1.06491	0.277267	3.84072	0.000122676	0.00136507	ENSMUSG00000056749	chr13	53121245	53135109	protein_coding
Celf5	39.3859	-1.3846	0.360626	-3.83944	0.000123317	0.00137143	ENSMUSG00000034818	chr10	81295061	81318543	protein_coding
Snca	20.3145	2.00021	0.521587	3.83485	0.000125642	0.00139027	ENSMUSG00000025889	chr6	60708559	60806839	protein_coding
Gm49759	430.316	-1.19172	0.311737	-3.82284	0.000131921	0.00145245	ENSMUSG00000111394	chr9	59580097	59583983	TEC
Mad2l1	874.454	-1.34207	0.35119	-3.82149	0.000132649	0.00145884	ENSMUSG00000029910	chr6	66512374	66524204	protein_coding
Gm39041	33.1549	-2.22837	0.58345	-3.8193	0.000133831	0.00146777	ENSMUSG00000108460	chr7	78948773	78952674	TEC
Car9	159.978	-1.07139	0.280571	-3.81859	0.000134217	0.00147038	ENSMUSG00000028463	chr4	43506966	43513729	protein_coding
Utf1	169.401	-1.92059	0.503699	-3.81298	0.000137302	0.0014959	ENSMUSG00000047751	chr7	139523702	139525025	protein_coding
Dnase2b	44.7448	-2.31961	0.608493	-3.81206	0.000137813	0.00149982	ENSMUSG00000028185	chr3	146286740	146321351	protein_coding
P2rx3	52.4665	1.75706	0.461503	3.80725	0.00014052	0.00152608	ENSMUSG00000027071	chr2	84828927	84867806	protein_coding
Sncaip	9.83222	6.24729	1.64116	3.80663	0.00014087	0.0015289	ENSMUSG00000024534	chr18	52900781	53049007	protein_coding
Tmem108	5.48988	-5.84104	1.53452	-3.80644	0.000140984	0.00152929	ENSMUSG00000042757	chr9	103360146	103639036	protein_coding
Gm26760	12.9959	3.2513	0.854648	3.80425	0.000142232	0.0015403	ENSMUSG00000097068	chr15	92242208	92275984	lncRNA
Mmp24	23.1327	2.62169	0.689476	3.80245	0.000143275	0.00154906	ENSMUSG00000027612	chr2	155617262	155660286	protein_coding
Bhlhb9	291.095	1.11005	0.292269	3.79803	0.000145854	0.00157179	ENSMUSG00000072964	chrX	134698343	134791830	protein_coding
Tektip1	4.86203	-5.06037	1.33272	-3.79702	0.000146448	0.00157734	ENSMUSG00000020234	chr10	81198901	81201650	protein_coding
Pnp2	25.8176	-2.05196	0.540523	-3.79626	0.000146897	0.00158131	ENSMUSG00000068417	chr14	51193449	51202206	protein_coding
Lgr5	7.69529	5.29666	1.3961	3.79389	0.000148305	0.00159129	ENSMUSG00000020140	chr10	115286216	115423685	protein_coding
Eif4ebp1	3928.73	1.03227	0.272143	3.79313	0.00014876	0.00159531	ENSMUSG00000031490	chr8	27750357	27766702	protein_coding
Fzd2	117.311	1.40927	0.371585	3.79258	0.000149089	0.00159595	ENSMUSG00000050288	chr11	102495222	102498884	protein_coding
Sgk2	40.5415	-1.56907	0.413776	-3.79208	0.00014939	0.00159773	ENSMUSG00000017868	chr2	162829250	162856047	protein_coding
Cdkn2d	97.6581	-1.62184	0.428463	-3.78524	0.000153557	0.00163613	ENSMUSG00000096472	chr9	21199706	21202703	protein_coding
Fmo2	173.126	1.63104	0.431292	3.78176	0.000155725	0.00165655	ENSMUSG00000040170	chr1	162701886	162726295	protein_coding
Hydin	5.9106	-5.94809	1.5745	-3.77775	0.000158252	0.00168072	ENSMUSG00000059854	chr8	110993609	111336885	protein_coding
Adgrf3	10.424	-3.19602	0.846879	-3.77388	0.000160726	0.00170244	ENSMUSG00000067642	chr5	30398429	30410720	protein_coding
Aldoc	628.658	-1.14783	0.304325	-3.77173	0.000162118	0.00171169	ENSMUSG00000017390	chr11	78213794	78218607	protein_coding
Dsg3	439.452	2.75868	0.731588	3.77081	0.000162719	0.00171439	ENSMUSG00000056632	chr18	20643331	20680516	protein_coding
Rps7-ps3	2112.71	1.08206	0.287258	3.76684	0.000165325	0.00173539	ENSMUSG00000095597	chrX	151692501	151693151	transcribed_processed_pseudogene
4930500H12Rik	4.29955	-5.49247	1.45847	-3.76592	0.000165938	0.00173998	ENSMUSG00000116976	chr16	72869226	73220555	lncRNA
Pde4a	166.816	-1.40391	0.37294	-3.76442	0.000166933	0.00174764	ENSMUSG00000032177	chr9	21077010	21124544	protein_coding
Krt15	159.676	-1.82453	0.484807	-3.76341	0.000167609	0.00175194	ENSMUSG00000054146	chr11	100022584	100026754	protein_coding
Prune2	16.3347	3.42244	0.910975	3.75689	0.000172037	0.00179255	ENSMUSG00000039126	chr19	16933482	17201296	protein_coding
Ak4	955.918	-1.18047	0.314208	-3.75697	0.000171984	0.00179255	ENSMUSG00000028527	chr4	101276474	101324192	protein_coding
Nqo1	80.4809	-2.15273	0.572976	-3.7571	0.000171895	0.00179255	ENSMUSG00000003849	chr8	108114857	108129838	protein_coding
Cdc42ep3	252.773	1.00245	0.267306	3.75021	0.000176687	0.00183618	ENSMUSG00000036533	chr17	79641156	79662520	protein_coding
Gm5452	41.7589	-1.46751	0.39135	-3.74986	0.00017693	0.00183677	ENSMUSG00000114687	chr13	83980459	83981455	processed_pseudogene
Cdh10	164.801	1.4436	0.385057	3.74905	0.000177503	0.00184079	ENSMUSG00000022321	chr15	18819033	19014322	protein_coding
Ifit3	44.8774	2.85642	0.761953	3.74882	0.000177668	0.00184154	ENSMUSG00000074896	chr19	34560931	34566131	protein_coding
Gm40915	48.1891	-1.33844	0.357076	-3.74834	0.000178009	0.00184411	ENSMUSG00000114404	chr13	37800940	37811579	lncRNA
Scd4	26.3354	-1.82864	0.487975	-3.7474	0.000178679	0.00184911	ENSMUSG00000050195	chr19	44321531	44335182	protein_coding
Peli2	347.237	-1.51432	0.404135	-3.74706	0.000178922	0.00185066	ENSMUSG00000021846	chr14	48358280	48519032	protein_coding
Cldn1	737.926	1.93917	0.517704	3.74571	0.000179884	0.00185771	ENSMUSG00000022512	chr16	26175392	26190591	protein_coding
Tprg	48.0567	-2.42222	0.64797	-3.73816	0.000185368	0.00190245	ENSMUSG00000048399	chr16	25105567	25241094	protein_coding
Rpl17	19145.1	1.07386	0.287683	3.73277	0.000189387	0.00193967	ENSMUSG00000062328	chr18	75131629	75136452	protein_coding
Rpe65	22.1956	-2.41624	0.647695	-3.73052	0.000191083	0.00195502	ENSMUSG00000028174	chr3	159304812	159330958	protein_coding
Gm20442	220.009	-1.1362	0.304629	-3.72977	0.000191654	0.00195985	ENSMUSG00000092600	chr17	36054215	36075083	lncRNA
Gm46339	8.94521	4.13282	1.10913	3.72617	0.00019441	0.00198159	ENSMUSG00000113959	chr12	19351654	19355192	TEC
Cep128	117.691	-1.05228	0.283182	-3.71592	0.000202466	0.00204823	ENSMUSG00000061533	chr12	90965266	91351183	protein_coding
ENSMUSG00000120514	48.1873	-1.57173	0.423254	-3.71346	0.000204447	0.00206616	ENSMUSG00000120514	chr19	61140004	61140729	lncRNA
Pcyox1l	463.168	-1.00752	0.271863	-3.706	0.000210559	0.00212359	ENSMUSG00000024579	chr18	61829908	61840706	protein_coding
Bean1	4.71485	5.77797	1.56012	3.70355	0.000212604	0.00214313	ENSMUSG00000031872	chr8	104897074	104945754	protein_coding
Skint6	12.3633	4.37593	1.18178	3.70284	0.000213197	0.00214801	ENSMUSG00000087194	chr4	112661813	113144170	protein_coding
Aifm3	78.6251	-1.12963	0.305484	-3.69784	0.000217442	0.00218301	ENSMUSG00000022763	chr16	17307475	17325349	protein_coding
Zfpm2	11.9404	3.32405	0.899109	3.69704	0.000218125	0.00218876	ENSMUSG00000022306	chr15	40518431	40967988	protein_coding
Gm35019	516.474	-1.26004	0.341194	-3.69302	0.000221611	0.00221924	ENSMUSG00000115326	chr15	37893239	37899960	lncRNA
Rps23rg1	13.5906	-3.21161	0.870539	-3.68922	0.00022494	0.0022469	ENSMUSG00000065952	chr8	3617990	3634939	protein_coding
Klk1b22	4.80856	5.80645	1.57549	3.68549	0.000228262	0.00227412	ENSMUSG00000060177	chr7	43762097	43766346	protein_coding
Tmem54	339.661	-2.28734	0.620672	-3.68526	0.000228468	0.00227412	ENSMUSG00000028786	chr4	128999341	129005419	protein_coding
Oaf	174.096	-1.0981	0.298085	-3.68384	0.000229742	0.00228336	ENSMUSG00000032014	chr9	43132532	43151208	protein_coding
Crocc	856.166	-1.88398	0.512497	-3.67608	0.00023685	0.00234109	ENSMUSG00000040860	chr4	140743948	140787861	protein_coding
Arhgef25	397.974	-1.0336	0.282131	-3.66355	0.000248744	0.00244646	ENSMUSG00000019467	chr10	127018394	127025952	protein_coding
Capsl	160.647	1.2815	0.34986	3.6629	0.000249378	0.00244662	ENSMUSG00000039676	chr15	9436114	9466124	protein_coding
Foxa2	216.588	-1.01489	0.277252	-3.66052	0.000251706	0.00246702	ENSMUSG00000037025	chr2	147884797	147888889	protein_coding
Lrrk2	18.3676	3.57595	0.97727	3.65912	0.000253084	0.00247808	ENSMUSG00000036273	chr15	91557378	91700323	protein_coding
Trib3	2449.33	1.92492	0.526294	3.65749	0.000254693	0.0024905	ENSMUSG00000032715	chr2	152179342	152185952	protein_coding
Atp2b2	1760.39	-1.90082	0.519712	-3.65746	0.00025473	0.0024905	ENSMUSG00000030302	chr6	113720792	114019574	protein_coding
Pglyrp3	14.6406	2.51396	0.688394	3.65192	0.000260283	0.00253603	ENSMUSG00000042244	chr3	91921890	91938889	protein_coding
Ung	224.229	-1.03884	0.284704	-3.64883	0.000263435	0.0025617	ENSMUSG00000029591	chr5	114268447	114277384	protein_coding
Inpp4b	88.809	-1.62683	0.44593	-3.64818	0.000264105	0.00256445	ENSMUSG00000037940	chr8	82069185	82854543	protein_coding
Gm32014	74.6067	-1.14455	0.313758	-3.64789	0.000264404	0.00256609	ENSMUSG00000111602	chr9	8644074	8740989	lncRNA
Ifit3b	16.2151	3.18846	0.874156	3.64747	0.00026483	0.00256772	ENSMUSG00000062488	chr19	34585370	34590801	protein_coding
Aqp9	20.223	3.26459	0.89512	3.64709	0.000265223	0.00256901	ENSMUSG00000032204	chr9	71017941	71075964	protein_coding
Stard8	35.2933	1.7575	0.481943	3.64669	0.000265636	0.00257175	ENSMUSG00000031216	chrX	98046854	98118334	protein_coding
Nrip3	14.2743	1.99469	0.547157	3.64555	0.000266818	0.0025769	ENSMUSG00000034825	chr7	109357262	109381232	protein_coding
Kctd12b	14.5174	5.13809	1.40964	3.64497	0.00026742	0.00258146	ENSMUSG00000041633	chrX	152468150	152479387	protein_coding
2210406O10Rik	4.45314	4.47544	1.22849	3.64303	0.000269443	0.00259341	ENSMUSG00000039563	chr5	36604955	36622197	lncRNA
Gm13420	29.7646	-1.36264	0.374103	-3.64242	0.00027009	0.00259711	ENSMUSG00000079497	chr2	29634931	29641697	protein_coding
Pm20d2	32.4809	1.27452	0.350226	3.63914	0.00027355	0.00262275	ENSMUSG00000054659	chr4	33174230	33189737	protein_coding
Cpt1c	32.1085	-1.65121	0.454026	-3.63681	0.000276035	0.00264274	ENSMUSG00000007783	chr7	44608796	44624275	protein_coding
Mlph	1801.56	-1.8886	0.519409	-3.63604	0.000276857	0.00264804	ENSMUSG00000026303	chr1	90842807	90878864	protein_coding
Slc16a6	4728.59	-1.03212	0.283943	-3.63496	0.00027802	0.0026566	ENSMUSG00000041920	chr11	109341681	109364424	protein_coding
Ggn	23.8222	-1.93639	0.53317	-3.63185	0.000281395	0.00267981	ENSMUSG00000031493	chr7	28869635	28873401	protein_coding
Gm3336	255.272	-1.34507	0.37051	-3.63033	0.00028306	0.00269049	ENSMUSG00000095026	chr8	71171192	71175283	protein_coding
Car8	128.001	1.57372	0.433568	3.62969	0.000283759	0.00269585	ENSMUSG00000041261	chr4	8143362	8239041	protein_coding
5730507C01Rik	12.9764	4.74954	1.31103	3.62277	0.000291466	0.00275718	ENSMUSG00000073197	chr12	18564511	18585255	protein_coding
Ppp2r2c	457.781	2.99305	0.827027	3.61904	0.000295692	0.00278784	ENSMUSG00000029120	chr5	37025857	37112422	protein_coding
Tmem86b	79.0729	-1.12458	0.310845	-3.61782	0.000297091	0.00279589	ENSMUSG00000045282	chr7	4631039	4634421	protein_coding
Rpl36a	4177.75	1.00177	0.277244	3.6133	0.00030232	0.00283683	ENSMUSG00000079435	chrX	133486403	133488811	protein_coding
Treh	34.1161	-5.34847	1.48043	-3.61278	0.000302937	0.00284127	ENSMUSG00000032098	chr9	44584530	44597602	protein_coding
Gm49405	59.843	-1.21719	0.337759	-3.60372	0.000313698	0.0029242	ENSMUSG00000024869	chr19	4050626	4055816	protein_coding
Zfp763	110.809	1.28518	0.357137	3.59857	0.000319974	0.00297292	ENSMUSG00000067430	chr17	33235837	33252376	protein_coding
Psph	1282.47	1.99069	0.553451	3.59687	0.000322071	0.0029854	ENSMUSG00000029446	chr5	129842622	129864513	protein_coding
Nckap5	55.2322	1.31216	0.365001	3.59496	0.000324441	0.00300036	ENSMUSG00000049690	chr1	125841357	126758536	protein_coding
Tnfrsf11a	102.418	-1.37787	0.383554	-3.59237	0.000327684	0.0030233	ENSMUSG00000026321	chr1	105708443	105775709	protein_coding
Usp18	463.49	1.25491	0.349461	3.591	0.000329413	0.00303501	ENSMUSG00000030107	chr6	121222865	121247876	protein_coding
Camk2n1	312.682	2.08147	0.580077	3.58826	0.000332886	0.00306128	ENSMUSG00000046447	chr4	138181625	138187434	protein_coding
Cdh22	8.71459	3.87301	1.07999	3.58616	0.000335583	0.00307755	ENSMUSG00000053166	chr2	164953427	165076773	protein_coding
D16Ertd472e	147.697	1.21332	0.338301	3.5865	0.000335149	0.00307755	ENSMUSG00000022864	chr16	78337226	78373596	protein_coding
Gm43429	174.838	-1.08816	0.303584	-3.58437	0.000337899	0.00309306	ENSMUSG00000106290	chr3	135566109	135568359	TEC
Stbd1	258.688	2.43612	0.680392	3.58046	0.000342985	0.0031295	ENSMUSG00000047963	chr5	92750900	92754438	protein_coding
Ppbp	1564.52	-1.0784	0.301331	-3.57879	0.000345183	0.00314701	ENSMUSG00000029372	chr5	90916377	90917922	protein_coding
AU041133	135.639	1.22994	0.34374	3.57813	0.000346066	0.00314746	ENSMUSG00000078435	chr10	81963847	81988899	protein_coding
Ifi44	358.402	1.20815	0.337803	3.57648	0.000348253	0.00316445	ENSMUSG00000028037	chr3	151436559	151455597	protein_coding
Slc29a1	131.009	-1.02813	0.287613	-3.57468	0.00035065	0.0031804	ENSMUSG00000023942	chr17	45896126	45910532	protein_coding
Gatm	35.5404	-1.55707	0.435978	-3.57143	0.000355032	0.00321427	ENSMUSG00000027199	chr2	122424948	122441784	protein_coding
5930430L01Rik	59.5147	-1.14287	0.320089	-3.57047	0.000356342	0.00322318	ENSMUSG00000106951	chr5	148926866	148932033	lncRNA
Ndnf	35.3053	-1.72319	0.483686	-3.56263	0.000367159	0.00329694	ENSMUSG00000049001	chr6	65648574	65689310	protein_coding
Zfp934	81.8721	-1.09291	0.30682	-3.56205	0.000367965	0.00330269	ENSMUSG00000074865	chr13	62627641	62719013	protein_coding
Fcmr	45.9736	-1.14673	0.322842	-3.55199	0.000382328	0.00341613	ENSMUSG00000042474	chr1	130793406	130808528	protein_coding
Hephl1	5.58642	5.42381	1.52736	3.55111	0.000383605	0.00342599	ENSMUSG00000031936	chr9	14963137	15023404	protein_coding
Gjb5	23.9382	-1.34223	0.379044	-3.5411	0.000398468	0.00353484	ENSMUSG00000042357	chr4	127248602	127251974	protein_coding
Adam33	963.915	-1.09644	0.30985	-3.5386	0.000402248	0.003562	ENSMUSG00000027318	chr2	130892511	130905734	protein_coding
Gm9951	28.7812	-1.82622	0.516197	-3.53784	0.000403415	0.00356914	ENSMUSG00000054618	chr8	34516416	34524200	lncRNA
Plcxd3	104.352	-1.91763	0.542486	-3.5349	0.000407926	0.00360422	ENSMUSG00000049148	chr15	4404973	4605035	protein_coding
Gm10685	4.55534	4.5044	1.27448	3.53432	0.00040883	0.00360739	ENSMUSG00000106429	chr3	96365525	96377972	lncRNA
Selenbp2	37.0787	-1.24971	0.353711	-3.53315	0.00041064	0.00362175	ENSMUSG00000068877	chr3	94600863	94611720	protein_coding
Cys1	790.648	-1.70421	0.482561	-3.53159	0.000413063	0.00363988	ENSMUSG00000062563	chr12	24715832	24731812	protein_coding
C78859	7.27197	-3.68831	1.04483	-3.53004	0.00041549	0.00365476	ENSMUSG00000110710	chr8	95048786	95054728	lncRNA
Sec1	66.3861	-1.50617	0.426747	-3.52943	0.00041646	0.00366167	ENSMUSG00000040364	chr7	45327110	45343826	protein_coding
Yjefn3	42.3926	1.20471	0.341412	3.52862	0.000417735	0.00367125	ENSMUSG00000048967	chr8	70340438	70355362	protein_coding
Vipr1	47.7649	2.10672	0.598425	3.52045	0.000430821	0.00376788	ENSMUSG00000032528	chr9	121471782	121502020	protein_coding
Slc25a35	133.436	-1.3801	0.392042	-3.52028	0.000431095	0.00376861	ENSMUSG00000018740	chr11	68858957	68865191	protein_coding
Dnah17	69.9108	-1.16422	0.330868	-3.51869	0.000433686	0.00378625	ENSMUSG00000033987	chr11	117912549	118021460	protein_coding
Gm14325	220.095	1.00732	0.286422	3.5169	0.000436625	0.00380688	ENSMUSG00000095362	chr2	177473584	177482129	protein_coding
Pla2g2d	54.2594	-1.80539	0.513585	-3.51526	0.000439324	0.003822	ENSMUSG00000041202	chr4	138503046	138509357	protein_coding
Msrb3	95.9159	1.47874	0.42106	3.51196	0.000444818	0.00386471	ENSMUSG00000051236	chr10	120617001	120735006	protein_coding
Serpine2	78.4902	1.45938	0.416035	3.50783	0.000451781	0.00392005	ENSMUSG00000026249	chr1	79771914	79838897	protein_coding
Gm37277	4.33236	4.43984	1.26694	3.50438	0.00045767	0.00396074	ENSMUSG00000103280	chr1	4975974	4977084	TEC
Ereg	138.734	1.06201	0.303418	3.50014	0.000465007	0.00401198	ENSMUSG00000029377	chr5	91222481	91241505	protein_coding
Gm5846	12.6941	-2.35715	0.673433	-3.5002	0.000464906	0.00401198	ENSMUSG00000104309	chr3	49335782	49337195	processed_pseudogene
Lypd3	84.6358	-1.09358	0.31252	-3.49924	0.000466582	0.00402031	ENSMUSG00000057454	chr7	24335975	24340543	protein_coding
Ina	7.01829	4.13757	1.18264	3.49859	0.000467733	0.00402729	ENSMUSG00000034336	chr19	47003137	47013766	protein_coding
Gm15612	6.41267	-3.80882	1.08869	-3.49855	0.000467798	0.00402729	ENSMUSG00000085828	chr6	88819836	88824256	lncRNA
Cfap91	21.1758	1.78834	0.511273	3.49782	0.000469077	0.0040348	ENSMUSG00000022805	chr16	38118116	38162505	protein_coding
Gcnt4	23.3287	1.7958	0.513891	3.49452	0.000474921	0.00407622	ENSMUSG00000091387	chr13	97061197	97087414	protein_coding
B4galnt4	78.7002	-1.11558	0.31978	-3.48858	0.000485601	0.00415349	ENSMUSG00000055629	chr7	140641017	140652313	protein_coding
Entpd7	267.249	-1.01109	0.289947	-3.48715	0.000488202	0.00416854	ENSMUSG00000025192	chr19	43678111	43722136	protein_coding
Pck2	2805.73	1.63332	0.468849	3.48367	0.000494588	0.00421293	ENSMUSG00000040618	chr14	55777723	55788699	protein_coding
Gm10275	787.441	1.04232	0.299206	3.48362	0.000494675	0.00421293	ENSMUSG00000069682	chr10	29574731	29575389	transcribed_processed_pseudogene
Nox4	181.615	2.67012	0.766929	3.48158	0.000498466	0.00423611	ENSMUSG00000030562	chr7	86895304	87047918	protein_coding
Evl	159.508	1.4899	0.428512	3.47691	0.000507228	0.00429951	ENSMUSG00000021262	chr12	108520979	108654775	protein_coding
Gm13375	97.0889	-1.19868	0.345096	-3.47346	0.000513788	0.00434767	ENSMUSG00000075514	chr2	20973833	20975168	lncRNA
Hsd17b2	96.9301	-2.84743	0.819836	-3.47317	0.000514351	0.00434872	ENSMUSG00000031844	chr8	118428643	118485766	protein_coding
Lrr1	9.91766	-3.2811	0.947422	-3.46319	0.000533806	0.00448832	ENSMUSG00000034883	chr12	69215588	69225783	protein_coding
Gm43327	12.4007	3.00015	0.867527	3.45828	0.000543631	0.00454778	ENSMUSG00000105695	chr3	126234661	126238715	TEC
Egln3	2094.57	-1.68686	0.487829	-3.45789	0.000544432	0.00455064	ENSMUSG00000035105	chr12	54225767	54250646	protein_coding
Gm50039	60.784	-4.27346	1.23754	-3.45318	0.00055401	0.004619	ENSMUSG00000117466	chr17	88132501	88146425	lncRNA
2010110K18Rik	3.35326	-5.13316	1.48704	-3.45194	0.00055658	0.00463653	ENSMUSG00000097755	chr18	34884796	34891747	lncRNA
Mturn	156.897	1.17223	0.339989	3.44785	0.000565061	0.00469731	ENSMUSG00000038065	chr6	54658609	54680836	protein_coding
2310081O03Rik	28.2684	1.89927	0.551275	3.44523	0.000570576	0.00473719	ENSMUSG00000085020	chr4	56220617	56224521	lncRNA
Ecm1	5410.45	-1.47606	0.428962	-3.44101	0.000579556	0.00479567	ENSMUSG00000028108	chr3	95641459	95646881	protein_coding
Atp7b	62.6066	-2.03335	0.591776	-3.43601	0.000590342	0.00487475	ENSMUSG00000006567	chr8	22482801	22550321	protein_coding
Sox6	15.6219	2.4337	0.708896	3.43309	0.000596742	0.00490995	ENSMUSG00000051910	chr7	115070107	115638031	protein_coding
Lgals12	99.875	-1.34742	0.39256	-3.43239	0.000598297	0.00491994	ENSMUSG00000024972	chr19	7574025	7584558	protein_coding
Pcdhga12	22.5303	2.49523	0.727444	3.43014	0.000603277	0.00495062	ENSMUSG00000102428	chr18	37898633	37974926	protein_coding

## Sheet: ALDH UP, p<0.005, L2FC > 1
gene_name	baseMean	log2FoldChange	lfcSE	stat	pvalue	padj	gene_id	seqid	start	end	gene_type
Npr3	25.7069	22.2277	3.02758	7.34173	2.1085e-13	2.14289e-11	ENSMUSG00000022206	chr15	11839982	11907373	protein_coding
Xlr3a	57.2181	9.37796	1.62437	5.77328	7.77426e-09	3.57472e-07	ENSMUSG00000057836	chrX	72129899	72140701	protein_coding
Smoc1	45.15	9.03664	1.04577	8.64114	5.56529e-18	1.0405e-15	ENSMUSG00000021136	chr12	81073582	81233188	protein_coding
Xlr3b	33.0963	8.58876	1.12686	7.62185	2.50069e-14	2.91522e-12	ENSMUSG00000073125	chrX	72235813	72246536	protein_coding
Wfdc18	38.7238	8.23374	1.51104	5.44907	5.06332e-08	1.94467e-06	ENSMUSG00000000983	chr11	83599841	83602174	protein_coding
Slc36a4	16.5448	7.58847	1.24515	6.09445	1.09817e-09	6.01202e-08	ENSMUSG00000043885	chr9	15621034	15654657	protein_coding
Gm20541	13.852	7.3298	1.12102	6.53853	6.21249e-11	4.31997e-09	ENSMUSG00000092390	chr17	38320538	38323287	unprocessed_pseudogene
Vmn1r51	12.8208	7.22059	1.10916	6.50998	7.51591e-11	5.18991e-09	ENSMUSG00000062818	chr6	90099578	90109246	protein_coding
Agtr2	8.84335	6.68468	1.50263	4.44864	8.6414e-06	0.000159902	ENSMUSG00000068122	chrX	21350783	21355403	protein_coding
Col1a2	7.78583	6.50212	1.23063	5.28356	1.26694e-07	4.34399e-06	ENSMUSG00000029661	chr6	4504814	4541544	protein_coding
Sncaip	9.83222	6.24729	1.64116	3.80663	0.00014087	0.0015289	ENSMUSG00000024534	chr18	52900781	53049007	protein_coding
Bmp5	5.80481	6.07364	1.39908	4.34116	1.41735e-05	0.000237039	ENSMUSG00000032179	chr9	75682646	75807592	protein_coding
Bcl11a	12.9602	6.06154	1.27076	4.77001	1.84216e-06	4.35136e-05	ENSMUSG00000000861	chr11	24028056	24124123	protein_coding
Gm34654	5.6614	6.03962	1.26898	4.75942	1.94152e-06	4.54812e-05	ENSMUSG00000111253	chr9	77714318	77717075	lncRNA
Vmn1r53	5.45697	5.98842	1.51307	3.95778	7.56494e-05	0.000923165	ENSMUSG00000057697	chr6	90200299	90201420	protein_coding
Ppp1r14a	5.33647	5.95457	1.2869	4.62707	3.70872e-06	7.95448e-05	ENSMUSG00000037166	chr7	28988733	28993226	protein_coding
Hoxd8	5.1838	5.91405	1.28435	4.6047	4.13062e-06	8.69008e-05	ENSMUSG00000027102	chr2	74534959	74538277	protein_coding
Klk1b22	4.80856	5.80645	1.57549	3.68549	0.000228262	0.00227412	ENSMUSG00000060177	chr7	43762097	43766346	protein_coding
Gm13230	86.8522	5.7994	0.562218	10.3152	6.01522e-25	2.38419e-22	ENSMUSG00000082082	chr4	145173310	145177458	transcribed_unprocessed_pseudogene
Bean1	4.71485	5.77797	1.56012	3.70355	0.000212604	0.00214313	ENSMUSG00000031872	chr8	104897074	104945754	protein_coding
Fgf5	6.54611	5.6496	1.29303	4.36927	1.24663e-05	0.000213902	ENSMUSG00000029337	chr5	98402043	98424889	protein_coding
Cachd1	6.08454	5.5471	1.21108	4.58027	4.64372e-06	9.52685e-05	ENSMUSG00000028532	chr4	100633872	100886417	protein_coding
Nxnl2	5.67995	5.44195	1.2439	4.37493	1.21474e-05	0.000209701	ENSMUSG00000021396	chr13	51325058	51329224	protein_coding
Hephl1	5.58642	5.42381	1.52736	3.55111	0.000383605	0.00342599	ENSMUSG00000031936	chr9	14963137	15023404	protein_coding
Trf	18.7261	5.31928	0.867533	6.1315	8.70543e-10	4.85984e-08	ENSMUSG00000032554	chr9	103081200	103107643	protein_coding
Lgr5	7.69529	5.29666	1.3961	3.79389	0.000148305	0.00159129	ENSMUSG00000020140	chr10	115286216	115423685	protein_coding
Platr16	10.8099	5.25466	1.2004	4.37744	1.20081e-05	0.000208021	ENSMUSG00000085101	chr4	145136815	145176326	lncRNA
Kctd12b	14.5174	5.13809	1.40964	3.64497	0.00026742	0.00258146	ENSMUSG00000041633	chrX	152468150	152479387	protein_coding
Col4a1	19.5644	5.11095	0.828802	6.16667	6.97433e-10	4.02966e-08	ENSMUSG00000031502	chr8	11248423	11362826	protein_coding
Rhoj	129.48	5.01238	0.49955	10.0338	1.08282e-23	3.46119e-21	ENSMUSG00000046768	chr12	75355096	75448230	protein_coding
8430419K02Rik	38.5452	4.83551	0.958826	5.04316	4.57902e-07	1.27747e-05	ENSMUSG00000085743	chr11	18795851	18824309	lncRNA
5730507C01Rik	12.9764	4.74954	1.31103	3.62277	0.000291466	0.00275718	ENSMUSG00000073197	chr12	18564511	18585255	protein_coding
Fstl1	7.61567	4.73314	1.20582	3.92526	8.66349e-05	0.00103119	ENSMUSG00000022816	chr16	37597235	37656876	protein_coding
Hspb8	69.8884	4.6896	0.507477	9.24101	2.44181e-20	5.83033e-18	ENSMUSG00000041548	chr5	116546550	116560923	protein_coding
Gm10685	4.55534	4.5044	1.27448	3.53432	0.00040883	0.00360739	ENSMUSG00000106429	chr3	96365525	96377972	lncRNA
2210406O10Rik	4.45314	4.47544	1.22849	3.64303	0.000269443	0.00259341	ENSMUSG00000039563	chr5	36604955	36622197	lncRNA
Gm37277	4.33236	4.43984	1.26694	3.50438	0.00045767	0.00396074	ENSMUSG00000103280	chr1	4975974	4977084	TEC
Ccdc65	215.097	4.42496	0.96189	4.60027	4.21936e-06	8.82061e-05	ENSMUSG00000003354	chr15	98606088	98621217	protein_coding
Skint6	12.3633	4.37593	1.18178	3.70284	0.000213197	0.00214801	ENSMUSG00000087194	chr4	112661813	113144170	protein_coding
Dlg2	14.1295	4.34396	1.12693	3.85468	0.000115882	0.00129749	ENSMUSG00000052572	chr7	90125880	92098455	protein_coding
Calb1	22.6764	4.30025	0.925709	4.64536	3.39485e-06	7.36096e-05	ENSMUSG00000028222	chr4	15881264	15908064	protein_coding
Mei4	95.7088	4.26262	1.09934	3.87744	0.000105561	0.00120161	ENSMUSG00000043289	chr9	81745723	82088060	protein_coding
Ripor2	23.6409	4.24877	0.807423	5.26213	1.42396e-07	4.76692e-06	ENSMUSG00000036006	chr13	24685508	24917799	protein_coding
Comp	20.1116	4.23624	1.04628	4.04886	5.14668e-05	0.000671473	ENSMUSG00000031849	chr8	70826208	70834716	protein_coding
Ina	7.01829	4.13757	1.18264	3.49859	0.000467733	0.00402729	ENSMUSG00000034336	chr19	47003137	47013766	protein_coding
Gm46339	8.94521	4.13282	1.10913	3.72617	0.00019441	0.00198159	ENSMUSG00000113959	chr12	19351654	19355192	TEC
Col5a2	19.7971	4.01213	0.752354	5.33277	9.67242e-08	3.4169e-06	ENSMUSG00000026042	chr1	45413481	45542442	protein_coding
Krt17	143.431	4.00584	0.932785	4.2945	1.7509e-05	0.000281651	ENSMUSG00000035557	chr11	100147043	100151855	protein_coding
Tceal8	119.399	3.9941	0.525338	7.60291	2.89546e-14	3.31689e-12	ENSMUSG00000051579	chrX	135069733	135073091	protein_coding
G0s2	42.8301	3.96437	0.620595	6.388	1.68065e-10	1.08847e-08	ENSMUSG00000009633	chr1	192954469	192955525	protein_coding
Gm12840	28.3185	3.90896	0.584205	6.69107	2.21551e-11	1.66314e-09	ENSMUSG00000086320	chr4	117557385	117558120	lncRNA
ENSMUSG00000120212	30.5588	3.87683	0.805388	4.81362	1.48222e-06	3.6265e-05	ENSMUSG00000120212	chr16	65461959	65551514	lncRNA
Cdh22	8.71459	3.87301	1.07999	3.58616	0.000335583	0.00307755	ENSMUSG00000053166	chr2	164953427	165076773	protein_coding
Cacna1h	67.8491	3.84051	0.546632	7.02577	2.12889e-12	1.80301e-10	ENSMUSG00000024112	chr17	25593259	25652757	protein_coding
Lox	36.1625	3.77847	0.6761	5.58863	2.2887e-08	9.37136e-07	ENSMUSG00000024529	chr18	52649139	52662939	protein_coding
Mme	446.859	3.75977	0.391873	9.59436	8.444e-22	2.20188e-19	ENSMUSG00000027820	chr3	63148958	63293451	protein_coding
Slc7a3	1110.04	3.6525	0.761258	4.79797	1.60278e-06	3.87838e-05	ENSMUSG00000031297	chrX	100122816	100129626	protein_coding
Lrrk2	18.3676	3.57595	0.97727	3.65912	0.000253084	0.00247808	ENSMUSG00000036273	chr15	91557378	91700323	protein_coding
Cth	1716.1	3.54439	0.586169	6.0467	1.47844e-09	7.87626e-08	ENSMUSG00000028179	chr3	157599885	157630714	protein_coding
Gm26671	18.86	3.49912	0.894637	3.91122	9.18309e-05	0.00107624	ENSMUSG00000097339	chr3	57520118	57533245	lncRNA
Prune2	16.3347	3.42244	0.910975	3.75689	0.000172037	0.00179255	ENSMUSG00000039126	chr19	16933482	17201296	protein_coding
Sytl2	17.2542	3.36414	0.786086	4.27961	1.87224e-05	0.000296595	ENSMUSG00000030616	chr7	89951460	90059927	protein_coding
Hoxb9	308.987	3.35199	0.429663	7.80145	6.12008e-15	7.77485e-13	ENSMUSG00000020875	chr11	96162283	96167421	protein_coding
Zfpm2	11.9404	3.32405	0.899109	3.69704	0.000218125	0.00218876	ENSMUSG00000022306	chr15	40518431	40967988	protein_coding
Aox3	52.7966	3.31622	0.776926	4.26838	1.96899e-05	0.000308226	ENSMUSG00000064294	chr1	58152289	58239857	protein_coding
Pcdhga11	15.4093	3.29342	0.817107	4.03058	5.56396e-05	0.000717881	ENSMUSG00000102742	chr18	37888784	37974926	protein_coding
Srrm4	25.8279	3.27828	0.574603	5.70529	1.16145e-08	5.10368e-07	ENSMUSG00000063919	chr5	116577334	116729876	protein_coding
Aqp9	20.223	3.26459	0.89512	3.64709	0.000265223	0.00256901	ENSMUSG00000032204	chr9	71017941	71075964	protein_coding
Gm26760	12.9959	3.2513	0.854648	3.80425	0.000142232	0.0015403	ENSMUSG00000097068	chr15	92242208	92275984	lncRNA
Ifit3b	16.2151	3.18846	0.874156	3.64747	0.00026483	0.00256772	ENSMUSG00000062488	chr19	34585370	34590801	protein_coding
Klf15	42.4817	3.16258	0.688828	4.59124	4.40623e-06	9.09611e-05	ENSMUSG00000030087	chr6	90439558	90452220	protein_coding
Irs2	34.4456	3.15098	0.762883	4.13036	3.62197e-05	0.000503367	ENSMUSG00000038894	chr8	11034681	11058458	protein_coding
Col26a1	42.6825	3.09465	0.744525	4.15654	3.23105e-05	0.000459018	ENSMUSG00000004415	chr5	136770613	136912063	protein_coding
Synm	85.4636	3.05642	0.534217	5.7213	1.0571e-08	4.70779e-07	ENSMUSG00000030554	chr7	67379908	67409490	protein_coding
Cldn2	582.793	3.04824	0.763014	3.995	6.46948e-05	0.000812498	ENSMUSG00000047230	chrX	138701577	138712135	protein_coding
Gm43327	12.4007	3.00015	0.867527	3.45828	0.000543631	0.00454778	ENSMUSG00000105695	chr3	126234661	126238715	TEC
Ppp2r2c	457.781	2.99305	0.827027	3.61904	0.000295692	0.00278784	ENSMUSG00000029120	chr5	37025857	37112422	protein_coding
Lims2	32.4956	2.89771	0.746914	3.87958	0.000104639	0.00119317	ENSMUSG00000024395	chr18	32055343	32091672	protein_coding
Fam169a	11.5998	2.88521	0.741476	3.89117	9.97602e-05	0.00114721	ENSMUSG00000041817	chr13	97203794	97267521	protein_coding
Col4a3	98.1181	2.86243	0.395439	7.23863	4.53244e-13	4.25706e-11	ENSMUSG00000079465	chr1	82564642	82699780	protein_coding
Ifit3	44.8774	2.85642	0.761953	3.74882	0.000177668	0.00184154	ENSMUSG00000074896	chr19	34560931	34566131	protein_coding
Cyb5r2	26.8058	2.84641	0.656562	4.33532	1.45545e-05	0.000242184	ENSMUSG00000048065	chr7	107347662	107357239	protein_coding
Tnfrsf11b	214.821	2.77339	0.464381	5.97223	2.34037e-09	1.18927e-07	ENSMUSG00000063727	chr15	54114015	54141880	protein_coding
Il1rl2	17.9971	2.76864	0.592441	4.67328	2.96422e-06	6.55643e-05	ENSMUSG00000070942	chr1	40363770	40406722	protein_coding
Calcrl	11.2347	2.76309	0.705328	3.91745	8.94906e-05	0.00105693	ENSMUSG00000059588	chr2	84160970	84255755	protein_coding
Dsg3	439.452	2.75868	0.731588	3.77081	0.000162719	0.00171439	ENSMUSG00000056632	chr18	20643331	20680516	protein_coding
Dleu7	45.0965	2.75451	0.638975	4.31082	1.62648e-05	0.000265297	ENSMUSG00000048281	chr14	62513680	62530496	protein_coding
Gas6	112.788	2.74651	0.3611	7.60595	2.82818e-14	3.25865e-12	ENSMUSG00000031451	chr8	13515374	13544490	protein_coding
Bmp6	39.7557	2.71471	0.441784	6.14488	8.00221e-10	4.51817e-08	ENSMUSG00000039004	chr13	38529083	38684278	protein_coding
Sowaha	20.2832	2.67518	0.591757	4.52075	6.16221e-06	0.000120555	ENSMUSG00000044352	chr11	53367400	53371101	protein_coding
Nox4	181.615	2.67012	0.766929	3.48158	0.000498466	0.00423611	ENSMUSG00000030562	chr7	86895304	87047918	protein_coding
Serpinb9b	621.413	2.63824	0.364989	7.22829	4.89101e-13	4.50837e-11	ENSMUSG00000021403	chr13	33211399	33225867	protein_coding
Mmp24	23.1327	2.62169	0.689476	3.80245	0.000143275	0.00154906	ENSMUSG00000027612	chr2	155617262	155660286	protein_coding
Sox21	32.5676	2.56708	0.526088	4.87957	1.06318e-06	2.73282e-05	ENSMUSG00000061517	chr14	118470644	118474442	protein_coding
Fads3	202.817	2.51784	0.412363	6.10589	1.02232e-09	5.6123e-08	ENSMUSG00000024664	chr19	10018933	10037474	protein_coding
Pglyrp3	14.6406	2.51396	0.688394	3.65192	0.000260283	0.00253603	ENSMUSG00000042244	chr3	91921890	91938889	protein_coding
Ifit1	39.2801	2.50847	0.633766	3.95804	7.5567e-05	0.000922872	ENSMUSG00000034459	chr19	34618271	34627409	protein_coding
Bmp4	70.8956	2.50144	0.49748	5.02823	4.95027e-07	1.36256e-05	ENSMUSG00000021835	chr14	46620977	46628126	protein_coding
Pcdhga12	22.5303	2.49523	0.727444	3.43014	0.000603277	0.00495062	ENSMUSG00000102428	chr18	37898633	37974926	protein_coding
Ecscr	68.33	2.49208	0.573081	4.34856	1.37037e-05	0.000231328	ENSMUSG00000073599	chr18	35846139	35855409	protein_coding
Adig	26.7051	2.4845	0.632736	3.92659	8.61577e-05	0.00102613	ENSMUSG00000044405	chr2	158344532	158350118	protein_coding
Btn1a1	576.688	2.4739	0.380294	6.50524	7.75719e-11	5.31945e-09	ENSMUSG00000000706	chr13	23641162	23650071	protein_coding
Tmprss11a	32.7166	2.46559	0.571852	4.31159	1.62085e-05	0.000264596	ENSMUSG00000072845	chr5	86558269	86616849	protein_coding
Cmtm3	189.775	2.44139	0.485265	5.03104	4.8783e-07	1.34649e-05	ENSMUSG00000031875	chr8	105066042	105074304	protein_coding
Stbd1	258.688	2.43612	0.680392	3.58046	0.000342985	0.0031295	ENSMUSG00000047963	chr5	92750900	92754438	protein_coding
Sox6	15.6219	2.4337	0.708896	3.43309	0.000596742	0.00490995	ENSMUSG00000051910	chr7	115070107	115638031	protein_coding
Atf3	454.713	2.4181	0.381476	6.33882	2.31538e-10	1.46135e-08	ENSMUSG00000026628	chr1	190902493	190950236	protein_coding
Rora	171.915	2.41297	0.327113	7.37659	1.62397e-13	1.67624e-11	ENSMUSG00000032238	chr9	68561068	69295528	protein_coding
Col4a4	131.9	2.41297	0.543693	4.43811	9.0754e-06	0.000165766	ENSMUSG00000067158	chr1	82426144	82564570	protein_coding
Nt5e	7093.5	2.39955	0.199062	12.0542	1.84203e-33	1.58719e-30	ENSMUSG00000032420	chr9	88209250	88254145	protein_coding
Adamts5	329.545	2.38721	0.584769	4.08232	4.45887e-05	0.000596072	ENSMUSG00000022894	chr16	85653061	85698716	protein_coding
Plag1	56.1947	2.38158	0.570901	4.17161	3.02456e-05	0.000434669	ENSMUSG00000003282	chr4	3900996	3938423	protein_coding
Galnt14	29.8414	2.33006	0.51872	4.49195	7.05749e-06	0.000134615	ENSMUSG00000024064	chr17	73800223	74017448	protein_coding
Gbp9	75.5605	2.31611	0.535102	4.32835	1.5023e-05	0.000248651	ENSMUSG00000029298	chr5	105225496	105287405	protein_coding
Ggta1	357.579	2.31168	0.392968	5.88263	4.03794e-09	1.96137e-07	ENSMUSG00000035778	chr2	35290191	35353243	protein_coding
Asns	5980.87	2.29055	0.543372	4.21543	2.49304e-05	0.000370924	ENSMUSG00000029752	chr6	7675169	7693254	protein_coding
Morn4	33.9236	2.25879	0.504726	4.47529	7.63092e-06	0.000143754	ENSMUSG00000049670	chr19	42063378	42074796	protein_coding
Anxa10	105.479	2.2544	0.518579	4.34727	1.37845e-05	0.000232298	ENSMUSG00000031635	chr8	62510076	62576184	protein_coding
Rragd	66.3542	2.25328	0.526379	4.28072	1.86292e-05	0.000295591	ENSMUSG00000028278	chr4	32983037	33022180	protein_coding
Dkk3	41.3386	2.24386	0.530869	4.22677	2.37075e-05	0.000355935	ENSMUSG00000030772	chr7	111715224	111758264	protein_coding
Gulo	113.307	2.22826	0.307663	7.24253	4.40395e-13	4.15607e-11	ENSMUSG00000034450	chr14	66224235	66246656	protein_coding
Niban1	2653.92	2.227	0.269074	8.27652	1.2683e-16	2.0435e-14	ENSMUSG00000026483	chr1	151446937	151597690	protein_coding
Tbc1d9	739.807	2.22433	0.305687	7.27651	3.42576e-13	3.31179e-11	ENSMUSG00000031709	chr8	83891981	83999563	protein_coding
Ccnd2	1941.3	2.2183	0.249719	8.88319	6.49725e-19	1.31718e-16	ENSMUSG00000000184	chr6	127102125	127129156	protein_coding
Palm3	42.3502	2.18764	0.390883	5.59664	2.1854e-08	9.02299e-07	ENSMUSG00000047986	chr8	84748100	84756924	protein_coding
Hr	38.1258	2.18478	0.412112	5.30142	1.14908e-07	3.98121e-06	ENSMUSG00000022096	chr14	70789652	70810988	protein_coding
Kctd4	40.3831	2.15602	0.46261	4.66055	3.15361e-06	6.92885e-05	ENSMUSG00000046523	chr14	76192449	76203646	protein_coding
Tsc22d3	335.869	2.13181	0.352066	6.05516	1.40278e-09	7.51357e-08	ENSMUSG00000031431	chrX	139440277	139501408	protein_coding
Vipr1	47.7649	2.10672	0.598425	3.52045	0.000430821	0.00376788	ENSMUSG00000032528	chr9	121471782	121502020	protein_coding
Camk2n1	312.682	2.08147	0.580077	3.58826	0.000332886	0.00306128	ENSMUSG00000046447	chr4	138181625	138187434	protein_coding
Tesc	44.5359	2.04021	0.448247	4.55154	5.32544e-06	0.00010607	ENSMUSG00000029359	chr5	118165808	118199943	protein_coding
Amz1	44.7232	2.03292	0.468169	4.34228	1.4101e-05	0.000236624	ENSMUSG00000050022	chr5	140709882	140747194	protein_coding
Slc38a1	475.61	2.02344	0.373569	5.4165	6.07756e-08	2.27685e-06	ENSMUSG00000023169	chr15	96469299	96540794	protein_coding
Clca3b	698.578	2.02038	0.32291	6.25679	3.92986e-10	2.38901e-08	ENSMUSG00000037033	chr3	144528384	144555118	protein_coding
Eif4e3	50.1515	2.01139	0.470176	4.27796	1.88616e-05	0.000298085	ENSMUSG00000093661	chr6	99602096	99643732	protein_coding
Snca	20.3145	2.00021	0.521587	3.83485	0.000125642	0.00139027	ENSMUSG00000025889	chr6	60708559	60806839	protein_coding
Nrip3	14.2743	1.99469	0.547157	3.64555	0.000266818	0.0025769	ENSMUSG00000034825	chr7	109357262	109381232	protein_coding
Psph	1282.47	1.99069	0.553451	3.59687	0.000322071	0.0029854	ENSMUSG00000029446	chr5	129842622	129864513	protein_coding
Atp13a5	130.617	1.98929	0.373348	5.32825	9.91624e-08	3.4968e-06	ENSMUSG00000048939	chr16	29050603	29197550	protein_coding
Atf5	6257.38	1.98295	0.411298	4.8212	1.42695e-06	3.51296e-05	ENSMUSG00000038539	chr7	44461680	44466082	protein_coding
Ints6l	28.2157	1.94484	0.5015	3.87805	0.000105299	0.00120001	ENSMUSG00000035967	chrX	55500217	55553203	protein_coding
Cldn1	737.926	1.93917	0.517704	3.74571	0.000179884	0.00185771	ENSMUSG00000022512	chr16	26175392	26190591	protein_coding
Trib3	2449.33	1.92492	0.526294	3.65749	0.000254693	0.0024905	ENSMUSG00000032715	chr2	152179342	152185952	protein_coding
2310081O03Rik	28.2684	1.89927	0.551275	3.44523	0.000570576	0.00473719	ENSMUSG00000085020	chr4	56220617	56224521	lncRNA
Mctp1	120.938	1.89762	0.275272	6.89363	5.43861e-12	4.39928e-10	ENSMUSG00000021596	chr13	76532259	77179929	protein_coding
Ccl20	393.789	1.89741	0.308669	6.14708	7.89242e-10	4.4762e-08	ENSMUSG00000026166	chr1	83094487	83096888	protein_coding
Fscn1	123.222	1.8668	0.385007	4.84873	1.24254e-06	3.12497e-05	ENSMUSG00000029581	chr5	142946098	142958940	protein_coding
Sox11	68.9408	1.86492	0.462255	4.03439	5.47436e-05	0.000707242	ENSMUSG00000063632	chr12	27384263	27392573	protein_coding
Ddit3	369.182	1.83419	0.282229	6.49895	8.0883e-11	5.52738e-09	ENSMUSG00000025408	chr10	127126643	127132157	protein_coding
Anxa8	804.411	1.82484	0.360948	5.05569	4.28848e-07	1.20895e-05	ENSMUSG00000021950	chr14	33807938	33822528	protein_coding
2610307P16Rik	37.3227	1.81087	0.451426	4.01143	6.03515e-05	0.000769161	ENSMUSG00000085936	chr13	28614558	29069613	lncRNA
Dsel	140.792	1.80921	0.310469	5.82733	5.63195e-09	2.64488e-07	ENSMUSG00000038702	chr1	111786432	111792648	protein_coding
Pcsk5	286.913	1.80664	0.323621	5.58259	2.36959e-08	9.68259e-07	ENSMUSG00000024713	chr19	17409683	17814996	protein_coding
Efhd1	290.571	1.79921	0.395885	4.54478	5.49939e-06	0.000108845	ENSMUSG00000026255	chr1	87192085	87238561	protein_coding
Gcnt4	23.3287	1.7958	0.513891	3.49452	0.000474921	0.00407622	ENSMUSG00000091387	chr13	97061197	97087414	protein_coding
Cfap91	21.1758	1.78834	0.511273	3.49782	0.000469077	0.0040348	ENSMUSG00000022805	chr16	38118116	38162505	protein_coding
Stard8	35.2933	1.7575	0.481943	3.64669	0.000265636	0.00257175	ENSMUSG00000031216	chrX	98046854	98118334	protein_coding
P2rx3	52.4665	1.75706	0.461503	3.80725	0.00014052	0.00152608	ENSMUSG00000027071	chr2	84828927	84867806	protein_coding
Wnt9a	335.178	1.75382	0.37327	4.69854	2.62027e-06	5.89427e-05	ENSMUSG00000000126	chr11	59197754	59224378	protein_coding
Lhfpl2	377.507	1.73883	0.403745	4.30676	1.65661e-05	0.000269768	ENSMUSG00000045312	chr13	94194304	94331917	protein_coding
Rnd1	334.085	1.72582	0.273411	6.31219	2.75121e-10	1.70386e-08	ENSMUSG00000054855	chr15	98561302	98575342	protein_coding
Kctd15	206.391	1.72456	0.286135	6.0271	1.66929e-09	8.82184e-08	ENSMUSG00000030499	chr7	34338439	34356157	protein_coding
Kif1a	146.913	1.72342	0.445568	3.86791	0.000109771	0.00123815	ENSMUSG00000014602	chr1	92943186	93029673	protein_coding
Upk3b	130.796	1.71506	0.252648	6.78832	1.13449e-11	8.95752e-10	ENSMUSG00000042985	chr5	136067350	136075341	protein_coding
Dse	57.212	1.7111	0.327871	5.21883	1.80061e-07	5.72331e-06	ENSMUSG00000039497	chr10	34027389	34083711	protein_coding
2410006H16Rik	1281.19	1.70489	0.343969	4.95653	7.17621e-07	1.91411e-05	ENSMUSG00000086841	chr11	62493650	62495725	lncRNA
Bnc2	66.1509	1.70368	0.42333	4.02448	5.7101e-05	0.000733395	ENSMUSG00000028487	chr4	84193332	84593512	protein_coding
Gm43305	381.4	1.7009	0.325649	5.22311	1.75939e-07	5.64202e-06	ENSMUSG00000105703	chr14	54529900	54534913	lncRNA
Phgdh	5654.5	1.6978	0.28949	5.8648	4.49674e-09	2.15778e-07	ENSMUSG00000053398	chr3	98220486	98247306	protein_coding
Scel	424.525	1.69739	0.309961	5.47614	4.34705e-08	1.69586e-06	ENSMUSG00000022123	chr14	103750778	103850233	protein_coding
Shisa2	379.665	1.69706	0.336434	5.04425	4.55303e-07	1.27499e-05	ENSMUSG00000044461	chr14	59862757	59869109	protein_coding
P2ry1	51.3541	1.69286	0.405124	4.17863	2.93265e-05	0.00042361	ENSMUSG00000027765	chr3	60910216	60916403	protein_coding
Prkg1	295.04	1.6722	0.262937	6.3597	2.02145e-10	1.29229e-08	ENSMUSG00000052920	chr19	30541889	31742433	protein_coding
Cxcl5	2222.93	1.67001	0.320007	5.21868	1.80207e-07	5.72331e-06	ENSMUSG00000029371	chr5	90907219	90909483	protein_coding
Tmem154	260.998	1.66561	0.401104	4.15257	3.28767e-05	0.000466393	ENSMUSG00000056498	chr3	84573499	84611882	protein_coding
Ppp2r2b	1208.8	1.66205	0.314771	5.28019	1.2905e-07	4.40014e-06	ENSMUSG00000024500	chr18	42770497	43216192	protein_coding
Acot2	191.821	1.65422	0.326748	5.06269	4.13371e-07	1.17031e-05	ENSMUSG00000021226	chr12	84034635	84040647	protein_coding
Arhgap28	456.786	1.6394	0.307305	5.33475	9.56784e-08	3.38599e-06	ENSMUSG00000024043	chr17	68149708	68311115	protein_coding
Pck2	2805.73	1.63332	0.468849	3.48367	0.000494588	0.00421293	ENSMUSG00000040618	chr14	55777723	55788699	protein_coding
Map2k3os	54.2105	1.63157	0.311066	5.24508	1.56214e-07	5.12559e-06	ENSMUSG00000042549	chr11	60811733	60822769	lncRNA
Fmo2	173.126	1.63104	0.431292	3.78176	0.000155725	0.00165655	ENSMUSG00000040170	chr1	162701886	162726295	protein_coding
Adrb1	72.6046	1.63062	0.385059	4.23473	2.2883e-05	0.000346975	ENSMUSG00000035283	chr19	56710631	56721545	protein_coding
Adamts1	866.02	1.62729	0.323307	5.03326	4.82206e-07	1.33469e-05	ENSMUSG00000022893	chr16	85590715	85600001	protein_coding
Mdfic	566.403	1.61633	0.299242	5.40142	6.61154e-08	2.44454e-06	ENSMUSG00000041390	chr6	15720660	15802168	protein_coding
Fbln5	123.366	1.59727	0.343573	4.64898	3.33577e-06	7.25666e-05	ENSMUSG00000021186	chr12	101712824	101785314	protein_coding
Kctd12	54.9508	1.59032	0.359435	4.4245	9.66672e-06	0.000173843	ENSMUSG00000098557	chr14	103214017	103220073	protein_coding
Pdlim1	1368.01	1.58181	0.28387	5.57229	2.51414e-08	1.02521e-06	ENSMUSG00000055044	chr19	40209617	40260286	protein_coding
Car8	128.001	1.57372	0.433568	3.62969	0.000283759	0.00269585	ENSMUSG00000041261	chr4	8143362	8239041	protein_coding
Ifi202b	529.345	1.56971	0.388077	4.04485	5.23561e-05	0.000682178	ENSMUSG00000026535	chr1	173790134	173810310	protein_coding
Grb10	4334	1.55058	0.187293	8.27893	1.24289e-16	2.01899e-14	ENSMUSG00000020176	chr11	11880508	11988683	protein_coding
Ldhb	412.957	1.54402	0.304412	5.07213	3.9339e-07	1.12014e-05	ENSMUSG00000030246	chr6	142435975	142453683	protein_coding
Dusp4	900	1.54193	0.353249	4.36499	1.27126e-05	0.000217001	ENSMUSG00000031530	chr8	35274451	35287048	protein_coding
Il36a	865.275	1.5365	0.309155	4.97	6.69512e-07	1.80356e-05	ENSMUSG00000026984	chr2	24105430	24115714	protein_coding
Cald1	2041.06	1.50694	0.284348	5.29964	1.16028e-07	4.013e-06	ENSMUSG00000029761	chr6	34575435	34752408	protein_coding
Evl	159.508	1.4899	0.428512	3.47691	0.000507228	0.00429951	ENSMUSG00000021262	chr12	108520979	108654775	protein_coding
Msrb3	95.9159	1.47874	0.42106	3.51196	0.000444818	0.00386471	ENSMUSG00000051236	chr10	120617001	120735006	protein_coding
Prdm16	104.072	1.46583	0.285349	5.13699	2.7918e-07	8.3451e-06	ENSMUSG00000039410	chr4	154400582	154721330	protein_coding
Serpine2	78.4902	1.45938	0.416035	3.50783	0.000451781	0.00392005	ENSMUSG00000026249	chr1	79771914	79838897	protein_coding
Crebrf	1070	1.45069	0.183548	7.9036	2.70963e-15	3.57996e-13	ENSMUSG00000048249	chr17	26934624	26995609	protein_coding
Gas5	2911.12	1.44734	0.246198	5.87876	4.13361e-09	1.99805e-07	ENSMUSG00000053332	chr1	160861992	160866116	lncRNA
Klf9	869.308	1.44506	0.222834	6.48492	8.87818e-11	6.02561e-09	ENSMUSG00000033863	chr19	23118590	23145498	protein_coding
Cdh10	164.801	1.4436	0.385057	3.74905	0.000177503	0.00184079	ENSMUSG00000022321	chr15	18819033	19014322	protein_coding
Psat1	6019.55	1.42911	0.308189	4.63714	3.53269e-06	7.63478e-05	ENSMUSG00000024640	chr19	15882042	15924701	protein_coding
Zfp992	311.768	1.42759	0.241983	5.89952	3.64564e-09	1.79725e-07	ENSMUSG00000070605	chr4	146533480	146554749	protein_coding
Jun	621.131	1.42738	0.214698	6.64835	2.96402e-11	2.20004e-09	ENSMUSG00000052684	chr4	94937271	94940459	protein_coding
Rnase4	193.551	1.42729	0.293758	4.85874	1.18137e-06	2.99009e-05	ENSMUSG00000021876	chr14	51328534	51343608	protein_coding
Pdzrn3	347.381	1.41578	0.322682	4.38753	1.14645e-05	0.000199477	ENSMUSG00000035357	chr6	101126570	101354858	protein_coding
Snhg1	925.058	1.4141	0.275476	5.13328	2.84729e-07	8.47262e-06	ENSMUSG00000108414	chr19	8700801	8703811	lncRNA
Bst1	532.145	1.41353	0.306364	4.61388	3.95224e-06	8.41305e-05	ENSMUSG00000029082	chr5	43976227	44001328	protein_coding
Fzd2	117.311	1.40927	0.371585	3.79258	0.000149089	0.00159595	ENSMUSG00000050288	chr11	102495222	102498884	protein_coding
Cpeb1	86.2574	1.40749	0.363324	3.87393	0.000107094	0.00121697	ENSMUSG00000025586	chr7	80996774	81105213	protein_coding
9930014A18Rik	116.687	1.40645	0.256251	5.48855	4.05238e-08	1.60299e-06	ENSMUSG00000097493	chr15	60694120	60703642	lncRNA
Syne1	263.765	1.39877	0.265263	5.27313	1.34114e-07	4.52943e-06	ENSMUSG00000096054	chr10	4970917	5501482	protein_coding
Jdp2	949.354	1.39854	0.281672	4.96514	6.86527e-07	1.84358e-05	ENSMUSG00000034271	chr12	85645801	85686652	protein_coding
Serpinb9	461.076	1.39354	0.254761	5.46999	4.50061e-08	1.74205e-06	ENSMUSG00000045827	chr13	33187233	33201940	protein_coding
Eda2r	707.611	1.39337	0.220513	6.31879	2.6362e-10	1.6429e-08	ENSMUSG00000034457	chrX	96377446	96420822	protein_coding
Stox2	164.099	1.39226	0.330156	4.21699	2.47589e-05	0.000368926	ENSMUSG00000038143	chr8	47633083	47899397	protein_coding
Rgs16	582.136	1.38747	0.327069	4.24212	2.21417e-05	0.000338061	ENSMUSG00000026475	chr1	153616095	153621214	protein_coding
Cers3	559.104	1.38125	0.235032	5.87687	4.18098e-09	2.01603e-07	ENSMUSG00000030510	chr7	66393252	66473439	protein_coding
Cxcl1	627.199	1.37818	0.195131	7.06282	1.63156e-12	1.42442e-10	ENSMUSG00000029380	chr5	91039100	91040974	protein_coding
Tuba1a	475.632	1.37583	0.288492	4.76904	1.85102e-06	4.36347e-05	ENSMUSG00000072235	chr15	98847718	98851584	protein_coding
Abca1	1569.9	1.36557	0.266202	5.12984	2.89995e-07	8.57115e-06	ENSMUSG00000015243	chr4	53030787	53159895	protein_coding
Pmaip1	3097.91	1.36486	0.264483	5.16048	2.4632e-07	7.49858e-06	ENSMUSG00000024521	chr18	66591604	66598636	protein_coding
Ddo	61.2625	1.36457	0.344369	3.96252	7.41617e-05	0.000911181	ENSMUSG00000063428	chr10	40506007	40557843	protein_coding
Rars	5439.8	1.36171	0.165924	8.20678	2.2719e-16	3.54524e-14	ENSMUSG00000018848	chr11	35699208	35725333	protein_coding
Arl14ep	1661.83	1.36133	0.185718	7.33008	2.30022e-13	2.32581e-11	ENSMUSG00000027122	chr2	106792872	106804769	protein_coding
Msx2	468.467	1.34299	0.277433	4.84076	1.29341e-06	3.23646e-05	ENSMUSG00000021469	chr13	53620920	53627110	protein_coding
Dhrs3	381.008	1.34156	0.320138	4.19056	2.78267e-05	0.000405385	ENSMUSG00000066026	chr4	144619397	144654779	protein_coding
Rpl12	22560.8	1.34111	0.255538	5.24818	1.53609e-07	5.06525e-06	ENSMUSG00000038900	chr2	32851571	32855357	protein_coding
St3gal2	114.062	1.33332	0.34062	3.91439	9.06344e-05	0.00106662	ENSMUSG00000031749	chr8	111646554	111699112	protein_coding
Rassf1	1605.86	1.31625	0.234475	5.6136	1.98162e-08	8.19869e-07	ENSMUSG00000010067	chr9	107428754	107439466	protein_coding
Nckap5	55.2322	1.31216	0.365001	3.59496	0.000324441	0.00300036	ENSMUSG00000049690	chr1	125841357	126758536	protein_coding
Pycr1	616.276	1.3095	0.295861	4.42606	9.5968e-06	0.000173214	ENSMUSG00000025140	chr11	120526538	120534595	protein_coding
Klf6	4634.23	1.30549	0.265239	4.92195	8.56876e-07	2.25819e-05	ENSMUSG00000000078	chr13	5911481	5920393	protein_coding
Rps3a1	17394.3	1.30547	0.251047	5.2001	1.99178e-07	6.19671e-06	ENSMUSG00000028081	chr3	86045247	86050009	protein_coding
Mgmt	286.946	1.30492	0.239387	5.45109	5.00617e-08	1.9302e-06	ENSMUSG00000054612	chr7	136496343	136731995	protein_coding
Rfesd	213.572	1.29949	0.282801	4.59506	4.32626e-06	8.98719e-05	ENSMUSG00000043190	chr13	76149654	76166838	protein_coding
Ptpn22	618.468	1.29275	0.316276	4.08741	4.3621e-05	0.000585296	ENSMUSG00000027843	chr3	103767111	103819563	protein_coding
Zfp763	110.809	1.28518	0.357137	3.59857	0.000319974	0.00297292	ENSMUSG00000067430	chr17	33235837	33252376	protein_coding
Capsl	160.647	1.2815	0.34986	3.6629	0.000249378	0.00244662	ENSMUSG00000039676	chr15	9436114	9466124	protein_coding
Zfand2a	1288.29	1.27668	0.280471	4.55193	5.31556e-06	0.00010598	ENSMUSG00000053581	chr5	139456966	139470304	protein_coding
Pm20d2	32.4809	1.27452	0.350226	3.63914	0.00027355	0.00262275	ENSMUSG00000054659	chr4	33174230	33189737	protein_coding
Ifi211	180.979	1.26147	0.29607	4.26073	2.03761e-05	0.000316964	ENSMUSG00000026536	chr1	173723911	173740612	protein_coding
Rps7	21616.6	1.25516	0.289144	4.34094	1.41872e-05	0.000237068	ENSMUSG00000061477	chr12	28680853	28685952	protein_coding
Usp18	463.49	1.25491	0.349461	3.591	0.000329413	0.00303501	ENSMUSG00000030107	chr6	121222865	121247876	protein_coding
Gpx3	3642.65	1.25483	0.31455	3.98929	6.62716e-05	0.000829148	ENSMUSG00000018339	chr11	54793279	54801203	protein_coding
As3mt	117.495	1.25393	0.232685	5.38896	7.08651e-08	2.58874e-06	ENSMUSG00000003559	chr19	46695897	46729538	protein_coding
Ar	393.4	1.25134	0.230909	5.41922	5.98606e-08	2.24681e-06	ENSMUSG00000046532	chrX	97192375	97366821	protein_coding
Zfp874b	88.0392	1.25028	0.278794	4.48461	7.30488e-06	0.000138166	ENSMUSG00000059839	chr13	67619632	67632377	protein_coding
Herpud1	2578.27	1.24677	0.157485	7.91675	2.43798e-15	3.24268e-13	ENSMUSG00000031770	chr8	95113066	95122005	protein_coding
Gm14326	98.769	1.24567	0.290508	4.28791	1.80359e-05	0.00028872	ENSMUSG00000078862	chr2	177577786	177599090	protein_coding
Zfp958	248.177	1.24077	0.293356	4.22957	2.34138e-05	0.00035259	ENSMUSG00000058748	chr8	4663167	4680231	protein_coding
Efcab2	59.4089	1.24011	0.250185	4.95677	7.16737e-07	1.91411e-05	ENSMUSG00000026495	chr1	178233650	178312078	protein_coding
Slc7a5	6787.54	1.23799	0.253591	4.88184	1.051e-06	2.70855e-05	ENSMUSG00000040010	chr8	122607889	122634433	protein_coding
Slit2	875.98	1.23372	0.246705	5.00078	5.71002e-07	1.55228e-05	ENSMUSG00000031558	chr5	48140480	48465075	protein_coding
Tenm4	489.561	1.23346	0.267959	4.60316	4.16119e-06	8.73586e-05	ENSMUSG00000048078	chr7	95820453	96560300	protein_coding
Maff	1850.14	1.23216	0.298095	4.13344	3.57375e-05	0.000498063	ENSMUSG00000042622	chr15	79230821	79243276	protein_coding
AU041133	135.639	1.22994	0.34374	3.57813	0.000346066	0.00314746	ENSMUSG00000078435	chr10	81963847	81988899	protein_coding
Nupr1	7659.39	1.22363	0.281101	4.35299	1.34296e-05	0.000227088	ENSMUSG00000030717	chr7	126222421	126230033	protein_coding
Rhob	1272.25	1.22299	0.21977	5.56485	2.62377e-08	1.06553e-06	ENSMUSG00000054364	chr12	8547661	8550009	protein_coding
Gpt2	1907.63	1.22286	0.259938	4.70445	2.54548e-06	5.75215e-05	ENSMUSG00000031700	chr8	86219205	86254189	protein_coding
Ifrd1	1628.45	1.21927	0.206933	5.89209	3.81334e-09	1.86599e-07	ENSMUSG00000001627	chr12	40251566	40298503	protein_coding
A630052C17Rik	94.6211	1.21646	0.273673	4.44494	8.79173e-06	0.000161928	ENSMUSG00000086725	chr11	29120909	29123558	lncRNA
D16Ertd472e	147.697	1.21332	0.338301	3.5865	0.000335149	0.00307755	ENSMUSG00000022864	chr16	78337226	78373596	protein_coding
Ifi44	358.402	1.20815	0.337803	3.57648	0.000348253	0.00316445	ENSMUSG00000028037	chr3	151436559	151455597	protein_coding
Yjefn3	42.3926	1.20471	0.341412	3.52862	0.000417735	0.00367125	ENSMUSG00000048967	chr8	70340438	70355362	protein_coding
Zfas1	936.01	1.20412	0.241421	4.98763	6.11235e-07	1.65033e-05	ENSMUSG00000074578	chr2	166904854	166907783	lncRNA
Ciart	157.378	1.19107	0.301386	3.95197	7.75102e-05	0.000941236	ENSMUSG00000038550	chr3	95785815	95789563	protein_coding
Atf4	8113.72	1.18998	0.227014	5.24188	1.58953e-07	5.18967e-06	ENSMUSG00000042406	chr15	80139385	80141742	protein_coding
Kcnq5	56.5684	1.18559	0.293735	4.03626	5.43106e-05	0.000703022	ENSMUSG00000028033	chr1	21468627	22032166	protein_coding
Slc6a9	1624.02	1.18409	0.290069	4.08208	4.46347e-05	0.000596072	ENSMUSG00000028542	chr4	117691703	117732395	protein_coding
Rassf10	201.971	1.18358	0.251634	4.70358	2.55645e-06	5.76737e-05	ENSMUSG00000098132	chr7	112553169	112556664	protein_coding
Slc25a33	662.085	1.17968	0.242413	4.8664	1.13647e-06	2.89494e-05	ENSMUSG00000028982	chr4	149828493	149858734	protein_coding
Zfp472	196.047	1.17488	0.270626	4.34136	1.41605e-05	0.000237021	ENSMUSG00000053600	chr17	33184788	33198207	protein_coding
Mturn	156.897	1.17223	0.339989	3.44785	0.000565061	0.00469731	ENSMUSG00000038065	chr6	54658609	54680836	protein_coding
Rpl17-ps3	102.316	1.1706	0.283742	4.12558	3.69795e-05	0.000511773	ENSMUSG00000113948	chr12	67557530	67558085	processed_pseudogene
Iah1	940.161	1.17021	0.173601	6.74077	1.57552e-11	1.20555e-09	ENSMUSG00000062054	chr12	21366390	21373820	protein_coding
Mamld1	146.033	1.16998	0.271722	4.30579	1.66389e-05	0.000270508	ENSMUSG00000059401	chrX	70093846	70199662	protein_coding
Ppp1r15a	2186.44	1.16682	0.183719	6.35109	2.138e-10	1.35804e-08	ENSMUSG00000040435	chr7	45172340	45175692	protein_coding
Rps24	13797.7	1.16493	0.270456	4.3073	1.65261e-05	0.000269338	ENSMUSG00000025290	chr14	24537193	24547027	protein_coding
Mab21l4	723.345	1.16269	0.282502	4.1157	3.86008e-05	0.000529772	ENSMUSG00000034159	chr1	93079071	93088670	protein_coding
Bend7	193.127	1.15957	0.187249	6.19267	5.91533e-10	3.47864e-08	ENSMUSG00000048186	chr2	4722642	4806953	protein_coding
Slc1a4	2132.91	1.15289	0.274849	4.19463	2.73318e-05	0.00039975	ENSMUSG00000020142	chr11	20252180	20282713	protein_coding
Usp53	1646.31	1.1524	0.199543	5.77521	7.68565e-09	3.54219e-07	ENSMUSG00000039701	chr3	122725142	122778159	protein_coding
Rps27	6418.05	1.14962	0.282174	4.07416	4.61807e-05	0.000613	ENSMUSG00000090733	chr3	90119829	90120958	protein_coding
Cav1	1961.19	1.14722	0.199843	5.74062	9.433e-09	4.25839e-07	ENSMUSG00000007655	chr6	17306334	17341451	protein_coding
Scx	153.454	1.14498	0.247918	4.61838	3.86753e-06	8.25934e-05	ENSMUSG00000034161	chr15	76341652	76343658	protein_coding
Ghitm	10091	1.13712	0.157265	7.23061	4.80816e-13	4.49472e-11	ENSMUSG00000041028	chr14	36842049	36857229	protein_coding
Dus4l	223.445	1.13389	0.220454	5.14344	2.69756e-07	8.11233e-06	ENSMUSG00000020648	chr12	31690049	31704825	protein_coding
C9orf72	570.639	1.13251	0.183127	6.18429	6.23818e-10	3.65764e-08	ENSMUSG00000028300	chr4	35191285	35226175	protein_coding
Zfp945	234.745	1.1325	0.282818	4.00435	6.21883e-05	0.000787737	ENSMUSG00000059142	chr17	23065671	23086108	protein_coding
Nr1d2	1322.97	1.1323	0.159466	7.10055	1.24261e-12	1.09937e-10	ENSMUSG00000021775	chr14	4230569	4265642	protein_coding
Timm10	197.155	1.12898	0.209715	5.38341	7.30858e-08	2.65277e-06	ENSMUSG00000027076	chr2	84657341	84660557	protein_coding
Nudt19	1211.86	1.12474	0.255526	4.40165	1.0743e-05	0.000189418	ENSMUSG00000034875	chr7	35246610	35255729	protein_coding
Tubb2b	1216.87	1.12191	0.289813	3.87114	0.000108328	0.00122747	ENSMUSG00000045136	chr13	34310731	34314449	protein_coding
Trim35	3327.69	1.12169	0.231332	4.84882	1.24197e-06	3.12497e-05	ENSMUSG00000022043	chr14	66534480	66548873	protein_coding
Rpl26	14612.8	1.11442	0.26904	4.14221	3.43977e-05	0.00048347	ENSMUSG00000060938	chr11	68792409	68797815	protein_coding
Hspa9	17872.3	1.11121	0.137615	8.07484	6.75668e-16	9.42985e-14	ENSMUSG00000024359	chr18	35070467	35087410	protein_coding
Bhlhb9	291.095	1.11005	0.292269	3.79803	0.000145854	0.00157179	ENSMUSG00000072964	chrX	134698343	134791830	protein_coding
Adora1	302.663	1.1084	0.284121	3.90115	9.57378e-05	0.0011102	ENSMUSG00000042429	chr1	134126961	134163169	protein_coding
Cebpg	2134.49	1.1047	0.176097	6.27325	3.53596e-10	2.16283e-08	ENSMUSG00000056216	chr7	34745847	34755998	protein_coding
Eef1b2	15820.8	1.09888	0.228175	4.81598	1.4648e-06	3.59276e-05	ENSMUSG00000025967	chr1	63215984	63219645	protein_coding
Nars	13276.4	1.09701	0.184804	5.93605	2.91978e-09	1.45388e-07	ENSMUSG00000024587	chr18	64632718	64649723	protein_coding
Zfp709	183.637	1.09527	0.266872	4.1041	4.05894e-05	0.000553995	ENSMUSG00000056019	chr8	72635863	72649571	protein_coding
2810013P06Rik	199.135	1.09502	0.245767	4.45553	8.36851e-06	0.000155871	ENSMUSG00000099881	chr8	123769156	123771349	lncRNA
Vldlr	1262.95	1.09256	0.235044	4.6483	3.34676e-06	7.2726e-05	ENSMUSG00000024924	chr19	27193884	27231631	protein_coding
Kif5c	2517.34	1.09133	0.216472	5.04142	4.62099e-07	1.28622e-05	ENSMUSG00000026764	chr2	49509310	49664790	protein_coding
4933421O10Rik	130.423	1.08766	0.207397	5.24433	1.5685e-07	5.13794e-06	ENSMUSG00000085037	chr4	33027142	33031323	lncRNA
Rhoq	1272.37	1.08679	0.163238	6.65765	2.78231e-11	2.08075e-09	ENSMUSG00000024143	chr17	87270510	87307497	protein_coding
Hspb1	1998.53	1.08561	0.227438	4.77324	1.8129e-06	4.29761e-05	ENSMUSG00000004951	chr5	135916773	135918417	protein_coding
Aldh18a1	4252	1.08239	0.266301	4.06453	4.81293e-05	0.000632092	ENSMUSG00000025007	chr19	40538701	40576907	protein_coding
Rps7-ps3	2112.71	1.08206	0.287258	3.76684	0.000165325	0.00173539	ENSMUSG00000095597	chrX	151692501	151693151	transcribed_processed_pseudogene
Rpl5	22601.4	1.07743	0.245422	4.3901	1.13297e-05	0.000197826	ENSMUSG00000058558	chr5	108048368	108056871	protein_coding
Rpl17	19145.1	1.07386	0.287683	3.73277	0.000189387	0.00193967	ENSMUSG00000062328	chr18	75131629	75136452	protein_coding
Rps12	14200.4	1.07204	0.278256	3.8527	0.00011682	0.00130578	ENSMUSG00000061983	chr10	23661081	23663173	protein_coding
Rpl34	7116.52	1.07044	0.267652	3.99936	6.35131e-05	0.000802744	ENSMUSG00000062006	chr3	130520480	130524047	protein_coding
Nfil3	1302.88	1.06491	0.277267	3.84072	0.000122676	0.00136507	ENSMUSG00000056749	chr13	53121245	53135109	protein_coding
Plk2	2688.33	1.06346	0.225958	4.70646	2.52055e-06	5.70883e-05	ENSMUSG00000021701	chr13	110531580	110537378	protein_coding
Ereg	138.734	1.06201	0.303418	3.50014	0.000465007	0.00401198	ENSMUSG00000029377	chr5	91222481	91241505	protein_coding
Gnpda2	518.812	1.0616	0.24192	4.38825	1.14268e-05	0.000199281	ENSMUSG00000029209	chr5	69730451	69749683	protein_coding
Wars1	4822.12	1.06159	0.141809	7.48604	7.09839e-14	7.72945e-12	ENSMUSG00000021266	chr12	108825956	108860100	protein_coding
Snhg12	293.082	1.06149	0.202304	5.24701	1.54584e-07	5.08484e-06	ENSMUSG00000086290	chr4	132035932	132038762	lncRNA
Sqstm1	14414.9	1.06127	0.182317	5.82101	5.84934e-09	2.74048e-07	ENSMUSG00000015837	chr11	50090193	50101654	protein_coding
Tcea1	1577.1	1.04819	0.127047	8.25041	1.57848e-16	2.50259e-14	ENSMUSG00000033813	chr1	4928037	4968132	protein_coding
Lratd2	3033.83	1.04683	0.169577	6.17318	6.69309e-10	3.88984e-08	ENSMUSG00000072568	chr15	60690843	60725627	protein_coding
Gm10275	787.441	1.04232	0.299206	3.48362	0.000494675	0.00421293	ENSMUSG00000069682	chr10	29574731	29575389	transcribed_processed_pseudogene
Kat8	464.321	1.03882	0.218285	4.75899	1.94567e-06	4.55246e-05	ENSMUSG00000030801	chr7	127511688	127525009	protein_coding
Eif4ebp1	3928.73	1.03227	0.272143	3.79313	0.00014876	0.00159531	ENSMUSG00000031490	chr8	27750357	27766702	protein_coding
Map3k15	178.366	1.02906	0.246592	4.17315	3.00421e-05	0.000432057	ENSMUSG00000031303	chrX	158771429	158906347	protein_coding
Aptx	515.374	1.02498	0.198715	5.15805	2.49538e-07	7.58488e-06	ENSMUSG00000028411	chr4	40682382	40703194	protein_coding
Lepr	390.33	1.02342	0.242263	4.22441	2.39566e-05	0.000358415	ENSMUSG00000057722	chr4	101574601	101672549	protein_coding
Tcaf2	273.354	1.01705	0.255095	3.98695	6.69289e-05	0.000835263	ENSMUSG00000029851	chr6	42599950	42622188	protein_coding
Nck1	1205.46	1.01629	0.137212	7.40674	1.29441e-13	1.35891e-11	ENSMUSG00000032475	chr9	100374346	100428187	protein_coding
Stk17b	144.059	1.0127	0.253404	3.9964	6.43138e-05	0.000808738	ENSMUSG00000026094	chr1	53794665	53824383	protein_coding
Sars	7103.08	1.01207	0.177478	5.7025	1.18066e-08	5.1652e-07	ENSMUSG00000068739	chr3	108332181	108352525	protein_coding
Sgk1	1969.56	1.00789	0.239214	4.21335	2.51609e-05	0.000373512	ENSMUSG00000019970	chr10	21758083	21875802	protein_coding
Gars	8039.43	1.00783	0.167602	6.01324	1.81857e-09	9.53665e-08	ENSMUSG00000029777	chr6	55014992	55056485	protein_coding
Gm14325	220.095	1.00732	0.286422	3.5169	0.000436625	0.00380688	ENSMUSG00000095362	chr2	177473584	177482129	protein_coding
Adk	809.816	1.00638	0.228002	4.41389	1.01529e-05	0.000180457	ENSMUSG00000039197	chr14	21102642	21498637	protein_coding
Ccn2	17240.3	1.00627	0.202771	4.96257	6.95666e-07	1.86559e-05	ENSMUSG00000019997	chr10	24471340	24474581	protein_coding
Phf10	2079	1.00622	0.196442	5.12222	3.01956e-07	8.86541e-06	ENSMUSG00000023883	chr17	15165271	15181535	protein_coding
Tpt1	67031	1.00576	0.24671	4.07668	4.56837e-05	0.000607217	ENSMUSG00000060126	chr14	76082533	76085965	protein_coding
Rbms3	188.598	1.00462	0.242587	4.14127	3.45391e-05	0.000484427	ENSMUSG00000039607	chr9	116401814	117701749	protein_coding
BC002059	162.031	1.00348	0.258047	3.88876	0.000100759	0.00115759	ENSMUSG00000060149	chr17	17171801	17194425	lncRNA
Cdc42ep3	252.773	1.00245	0.267306	3.75021	0.000176687	0.00183618	ENSMUSG00000036533	chr17	79641156	79662520	protein_coding
Rpl36a	4177.75	1.00177	0.277244	3.6133	0.00030232	0.00283683	ENSMUSG00000079435	chrX	133486403	133488811	protein_coding

## Sheet: ALDH DOWN, p<0.005, L2FC < -1
gene_name	baseMean	log2FoldChange	lfcSE	stat	pvalue	padj	gene_id	seqid	start	end	gene_type
Ccnb1	354.492	-5.43664	0.29779	-18.2566	1.83318e-74	3.633e-70	ENSMUSG00000041431	chr13	100915158	100923078	protein_coding
Kap	7348.08	-5.40813	0.30038	-18.0043	1.8023e-72	1.78589e-68	ENSMUSG00000032758	chr6	133826814	133830725	protein_coding
Ccnb2	292.795	-5.46564	0.340629	-16.0457	6.1245e-58	4.04585e-54	ENSMUSG00000032218	chr9	70314974	70328829	protein_coding
Ube2c	484.012	-5.09269	0.327446	-15.5528	1.52358e-54	7.54859e-51	ENSMUSG00000001403	chr2	164611818	164620742	protein_coding
Plk1	430.98	-5.65989	0.37593	-15.0557	3.16804e-51	1.25569e-47	ENSMUSG00000030867	chr7	121758662	121769096	protein_coding
Bmp1	4141.22	-1.58061	0.108319	-14.5922	3.1476e-48	1.03965e-44	ENSMUSG00000022098	chr14	70711998	70757674	protein_coding
Top2a	1405.53	-5.01978	0.344823	-14.5576	5.22782e-48	1.48007e-44	ENSMUSG00000020914	chr11	98883769	98915015	protein_coding
Cdc20	524.483	-3.54749	0.245648	-14.4413	2.84256e-47	7.04173e-44	ENSMUSG00000006398	chr4	118290098	118294549	protein_coding
Iqgap3	337.796	-5.58019	0.392264	-14.2256	6.35784e-46	1.4e-42	ENSMUSG00000028068	chr3	87989278	88028355	protein_coding
Kntc1	234.509	-5.32128	0.375713	-14.1631	1.5492e-45	3.07021e-42	ENSMUSG00000029414	chr5	123887779	123959656	protein_coding
Kif11	279.875	-4.86396	0.346859	-14.0229	1.12931e-44	2.03461e-41	ENSMUSG00000012443	chr19	37364851	37410307	protein_coding
Pbk	196.487	-6.16046	0.455277	-13.5312	1.02281e-41	1.68916e-38	ENSMUSG00000022033	chr14	66043286	66055271	protein_coding
Ccna2	357.653	-5.10116	0.379721	-13.434	3.82362e-41	5.82896e-38	ENSMUSG00000027715	chr3	36619014	36626299	protein_coding
Bub1b	311.804	-4.8684	0.374554	-12.9979	1.25829e-38	1.7812e-35	ENSMUSG00000040084	chr2	118428692	118472072	protein_coding
Tpx2	556.657	-3.81363	0.29447	-12.9508	2.32464e-38	3.07131e-35	ENSMUSG00000027469	chr2	152689884	152737241	protein_coding
Nusap1	222.814	-4.01183	0.314946	-12.7381	3.62923e-37	4.49526e-34	ENSMUSG00000027306	chr2	119448779	119481725	protein_coding
Aspm	179.452	-5.69062	0.449427	-12.6619	9.60963e-37	1.12026e-33	ENSMUSG00000033952	chr1	139382510	139421829	protein_coding
Kif4	181.484	-5.11025	0.406817	-12.5615	3.43549e-36	3.78248e-33	ENSMUSG00000034311	chrX	99669343	99770820	protein_coding
Dlgap5	190.277	-4.69847	0.376388	-12.4831	9.23748e-36	9.63518e-33	ENSMUSG00000037544	chr14	47625236	47655864	protein_coding
Kif2c	168.579	-7.31893	0.593119	-12.3397	5.53408e-35	5.48372e-32	ENSMUSG00000028678	chr4	117016836	117039836	protein_coding
Birc5	143.084	-5.14032	0.419406	-12.2562	1.55676e-34	1.46914e-31	ENSMUSG00000017716	chr11	117740077	117746569	protein_coding
Cenpe	292.323	-4.04266	0.330325	-12.2384	1.93782e-34	1.74562e-31	ENSMUSG00000045328	chr3	134918298	134979372	protein_coding
Tm7sf2	512.388	-2.24966	0.187492	-11.9987	3.60979e-33	2.98078e-30	ENSMUSG00000024799	chr19	6112851	6118403	protein_coding
Brca1	257.227	-3.7087	0.311292	-11.9139	1.00196e-32	7.94272e-30	ENSMUSG00000017146	chr11	101379590	101442781	protein_coding
Cd68	1039.3	-2.01446	0.169693	-11.8712	1.67023e-32	1.2731e-29	ENSMUSG00000018774	chr11	69555039	69556979	protein_coding
Prc1	400.087	-2.78622	0.237693	-11.7219	9.84179e-32	7.22387e-29	ENSMUSG00000038943	chr7	79944198	79966007	protein_coding
Racgap1	602.576	-4.11795	0.352397	-11.6855	1.51127e-31	1.06965e-28	ENSMUSG00000023015	chr15	99518377	99549537	protein_coding
AU015791	204.391	-3.12927	0.268198	-11.6677	1.86335e-31	1.27337e-28	ENSMUSG00000113535	chr12	105479639	105481513	lncRNA
Pclaf	249.281	-4.70884	0.404523	-11.6405	2.56603e-31	1.69512e-28	ENSMUSG00000040204	chr9	65797519	65810548	protein_coding
Car2	6871.06	-1.81804	0.157506	-11.5426	8.04146e-31	5.14083e-28	ENSMUSG00000027562	chr3	14951333	14965830	protein_coding
Anln	3139.47	-1.46059	0.127983	-11.4124	3.62492e-30	2.24496e-27	ENSMUSG00000036777	chr9	22243308	22300484	protein_coding
Foxm1	340.348	-3.02607	0.267343	-11.319	1.05625e-29	6.34325e-27	ENSMUSG00000001517	chr6	128339930	128353109	protein_coding
Nek2	213.245	-4.07135	0.360978	-11.2787	1.6725e-29	9.74868e-27	ENSMUSG00000026622	chr1	191553556	191565162	protein_coding
Mcm5	736.087	-2.95349	0.26738	-11.046	2.29079e-28	1.29711e-25	ENSMUSG00000005410	chr8	75836197	75855067	protein_coding
Mki67	1438.92	-6.61254	0.600184	-11.0175	3.14582e-28	1.73178e-25	ENSMUSG00000031004	chr7	135291513	135318090	protein_coding
Kif22	186.624	-3.89455	0.354451	-10.9875	4.38691e-28	2.34972e-25	ENSMUSG00000030677	chr7	126626901	126641643	protein_coding
Rrm2	944.86	-3.66559	0.33402	-10.9742	5.08616e-28	2.65257e-25	ENSMUSG00000020649	chr12	24758240	24764145	protein_coding
Cdca3	214.45	-4.15476	0.381159	-10.9003	1.14818e-27	5.83452e-25	ENSMUSG00000023505	chr6	124806510	124810664	protein_coding
Knl1	135.516	-4.23863	0.390445	-10.8559	1.86969e-27	9.14684e-25	ENSMUSG00000027326	chr2	118877600	118935982	protein_coding
Uhrf1	910.61	-3.06546	0.282406	-10.8548	1.89232e-27	9.14684e-25	ENSMUSG00000001228	chr17	56610321	56630486	protein_coding
Chil4	4505.39	-2.50597	0.232446	-10.7809	4.23867e-27	2.00005e-24	ENSMUSG00000063779	chr3	106108806	106126823	protein_coding
Kif20a	301.649	-3.74743	0.348786	-10.7442	6.30982e-27	2.90809e-24	ENSMUSG00000003779	chr18	34757666	34766330	protein_coding
Ect2	488.231	-2.71579	0.256124	-10.6034	2.87344e-26	1.29422e-23	ENSMUSG00000027699	chr3	27151371	27208027	protein_coding
Spag5	251.01	-3.88733	0.367841	-10.568	4.19408e-26	1.84707e-23	ENSMUSG00000002055	chr11	78192355	78213283	protein_coding
Sprr2a3	1171.3	-3.68003	0.349427	-10.5316	6.17661e-26	2.66105e-23	ENSMUSG00000074445	chr3	92192724	92198712	protein_coding
Mcm10	115.811	-3.42177	0.325415	-10.5151	7.35993e-26	3.10339e-23	ENSMUSG00000026669	chr2	4994525	5017602	protein_coding
Cdca2	195.892	-3.70729	0.356237	-10.4068	2.30852e-25	9.53128e-23	ENSMUSG00000048922	chr14	67913780	67953290	protein_coding
Nuf2	95.86	-5.15918	0.49892	-10.3407	4.61138e-25	1.86507e-22	ENSMUSG00000026683	chr1	169325503	169359033	protein_coding
Slfn9	399.015	-3.67484	0.356324	-10.3132	6.14318e-25	2.38717e-22	ENSMUSG00000069793	chr11	82869216	82882656	protein_coding
Espl1	229.115	-8.29381	0.80719	-10.2749	9.142e-25	3.48416e-22	ENSMUSG00000058290	chr15	102204701	102232792	protein_coding
Cdca8	326.3	-2.40093	0.234735	-10.2283	1.48152e-24	5.53976e-22	ENSMUSG00000028873	chr4	124812258	124833104	protein_coding
Cdk1	445.933	-2.89633	0.283259	-10.225	1.53175e-24	5.62153e-22	ENSMUSG00000019942	chr10	69170976	69188768	protein_coding
Fancd2	127.425	-3.70034	0.364304	-10.1573	3.07589e-24	1.10833e-21	ENSMUSG00000034023	chr6	113508643	113573978	protein_coding
Ncaph	461.688	-2.41219	0.23835	-10.1204	4.48655e-24	1.58776e-21	ENSMUSG00000034906	chr2	126945729	126975874	protein_coding
Kif15	117.371	-3.92913	0.389438	-10.0893	6.16386e-24	2.14308e-21	ENSMUSG00000036768	chr9	122780111	122847798	protein_coding
Ttk	95.9048	-5.55632	0.551148	-10.0814	6.67922e-24	2.28222e-21	ENSMUSG00000038379	chr9	83716742	83754442	protein_coding
Aurka	237.732	-3.93406	0.390446	-10.0758	7.06921e-24	2.37454e-21	ENSMUSG00000027496	chr2	172198110	172212455	protein_coding
Bard1	159.222	-2.52493	0.251533	-10.0382	1.03576e-23	3.42111e-21	ENSMUSG00000026196	chr1	71066657	71142305	protein_coding
Fam111a	187.928	-4.86988	0.485342	-10.0339	1.08144e-23	3.46119e-21	ENSMUSG00000024691	chr19	12523104	12567132	protein_coding
Nsdhl	1239.17	-1.40035	0.139999	-10.0025	1.48524e-23	4.67213e-21	ENSMUSG00000031349	chrX	71962163	72002120	protein_coding
Prr11	129.801	-3.92866	0.393636	-9.98046	1.85603e-23	5.74732e-21	ENSMUSG00000020493	chr11	86979979	86999534	protein_coding
Rad51	181.065	-3.21537	0.323027	-9.95388	2.42529e-23	7.39453e-21	ENSMUSG00000027323	chr2	118943274	118977926	protein_coding
Ly6c1	1825.56	-2.27822	0.229564	-9.92414	3.26903e-23	9.816e-21	ENSMUSG00000079018	chr15	74915867	74920679	protein_coding
Tacc3	356.891	-2.60934	0.263604	-9.8987	4.21737e-23	1.24746e-20	ENSMUSG00000037313	chr5	33815472	33836339	protein_coding
Ncapd2	787.889	-2.56454	0.261864	-9.79342	1.20166e-22	3.50214e-20	ENSMUSG00000038252	chr6	125144970	125168664	protein_coding
Ncapg	208.832	-3.84639	0.393689	-9.77013	1.51254e-22	4.34428e-20	ENSMUSG00000015880	chr5	45827261	45857888	protein_coding
Fbln1	15786.8	-2.27402	0.233237	-9.74983	1.84785e-22	5.23153e-20	ENSMUSG00000006369	chr15	85090150	85170736	protein_coding
Kif18b	102.289	-4.55845	0.468116	-9.73786	2.07892e-22	5.72224e-20	ENSMUSG00000051378	chr11	102796355	102815950	protein_coding
Kifc1	261.632	-2.44769	0.251336	-9.73871	2.06155e-22	5.72224e-20	ENSMUSG00000079553	chr17	34094633	34109635	protein_coding
Ckap2l	214.675	-4.23643	0.435213	-9.73415	2.15606e-22	5.85327e-20	ENSMUSG00000048327	chr2	129110130	129139132	protein_coding
Pimreg	86.4123	-5.31558	0.551864	-9.63204	5.85535e-22	1.56813e-19	ENSMUSG00000020808	chr11	71932858	71938196	protein_coding
Sipa1	572.98	-1.23299	0.128329	-9.60806	7.39316e-22	1.95357e-19	ENSMUSG00000056917	chr19	5701213	5713735	protein_coding
Chaf1a	334.428	-2.76382	0.288497	-9.58005	9.69948e-22	2.49642e-19	ENSMUSG00000002835	chr17	56347439	56379289	protein_coding
Ncapg2	358.274	-2.95069	0.30999	-9.51867	1.75406e-21	4.45667e-19	ENSMUSG00000042029	chr12	116369022	116427351	protein_coding
Atp2c2	6887.37	-1.50186	0.159458	-9.4185	4.57566e-21	1.14785e-18	ENSMUSG00000034112	chr8	120426748	120484456	protein_coding
Cenpa	327.799	-3.12231	0.331805	-9.41009	4.95735e-21	1.22806e-18	ENSMUSG00000029177	chr5	30824121	30832174	protein_coding
Mcm6	1067.43	-1.86986	0.20051	-9.32553	1.10432e-20	2.70191e-18	ENSMUSG00000026355	chr1	128259327	128287401	protein_coding
Tk1	374.793	-2.31908	0.250658	-9.25195	2.20424e-20	5.32727e-18	ENSMUSG00000025574	chr11	117706352	117716918	protein_coding
Knstrn	304.814	-2.39316	0.259236	-9.23158	2.6668e-20	6.29175e-18	ENSMUSG00000027331	chr2	118644484	118684438	protein_coding
Exo1	87.6609	-3.83302	0.416223	-9.20905	3.29038e-20	7.67163e-18	ENSMUSG00000039748	chr1	175708147	175741055	protein_coding
Asf1b	146.865	-3.69358	0.401778	-9.19306	3.81811e-20	8.79852e-18	ENSMUSG00000005470	chr8	84682136	84696826	protein_coding
Shcbp1	78.6039	-4.59731	0.50052	-9.18506	4.11282e-20	9.36872e-18	ENSMUSG00000022322	chr8	4785976	4829567	protein_coding
Ankle1	80.3413	-7.25249	0.793341	-9.1417	6.14788e-20	1.38453e-17	ENSMUSG00000046295	chr8	71858654	71862548	protein_coding
Esco2	81.0256	-5.23807	0.57596	-9.0945	9.50203e-20	2.11586e-17	ENSMUSG00000022034	chr14	66056487	66071443	protein_coding
Mcm3	936.802	-2.06987	0.227904	-9.08219	1.06409e-19	2.34313e-17	ENSMUSG00000041859	chr1	20873192	20890536	protein_coding
Fer1l4	889.483	-1.87025	0.206315	-9.06504	1.24564e-19	2.71275e-17	ENSMUSG00000013338	chr2	155861059	155894867	protein_coding
Pif1	64.3954	-6.6825	0.738977	-9.0429	1.52569e-19	3.28653e-17	ENSMUSG00000041064	chr9	65494442	65503249	protein_coding
Spc24	90.3555	-3.8309	0.425167	-9.01035	2.05409e-19	4.3772e-17	ENSMUSG00000074476	chr9	21666738	21671599	protein_coding
Pold1	572.821	-1.6654	0.184997	-9.00232	2.21007e-19	4.65948e-17	ENSMUSG00000038644	chr7	44182170	44198273	protein_coding
Kif23	514.301	-2.49989	0.278405	-8.97932	2.72437e-19	5.68331e-17	ENSMUSG00000032254	chr9	61823187	61854056	protein_coding
Cdc6	209.307	-3.65562	0.410369	-8.90815	5.18917e-19	1.07124e-16	ENSMUSG00000017499	chr11	98798627	98814766	protein_coding
Nlgn2	1400.75	-1.14789	0.129224	-8.88291	6.51348e-19	1.31718e-16	ENSMUSG00000051790	chr11	69713948	69728610	protein_coding
Stil	181.658	-2.11238	0.23884	-8.8443	9.21015e-19	1.8437e-16	ENSMUSG00000028718	chr4	114857356	114900393	protein_coding
Cdkn2c	139.574	-2.72705	0.309431	-8.81311	1.21726e-18	2.41236e-16	ENSMUSG00000028551	chr4	109518073	109524386	protein_coding
Fanci	53.8227	-3.5022	0.397726	-8.80556	1.30202e-18	2.5548e-16	ENSMUSG00000039187	chr7	79041677	79100012	protein_coding
Ccnf	305.089	-2.69207	0.306556	-8.78165	1.61096e-18	3.13001e-16	ENSMUSG00000072082	chr17	24441172	24470458	protein_coding
Chn1os3	591.352	-1.67144	0.192353	-8.68941	3.64324e-18	7.00988e-16	ENSMUSG00000086544	chr2	73426870	73446356	lncRNA
Slc26a1	322.796	-3.11346	0.358713	-8.67952	3.97445e-18	7.57363e-16	ENSMUSG00000046959	chr5	108817744	108823435	protein_coding
Cdc45	116.589	-2.72317	0.314783	-8.65092	5.10837e-18	9.64168e-16	ENSMUSG00000000028	chr16	18599197	18630737	protein_coding
Cyp51	3300.43	-1.33183	0.154443	-8.62348	6.49485e-18	1.20294e-15	ENSMUSG00000001467	chr5	4131145	4154746	protein_coding
Spink8	433.222	-3.14618	0.365312	-8.61232	7.15966e-18	1.3138e-15	ENSMUSG00000050074	chr9	109641348	109655701	protein_coding
Neil3	53.8238	-6.01377	0.698373	-8.61111	7.23541e-18	1.31552e-15	ENSMUSG00000039396	chr8	54039902	54092100	protein_coding
Kirrel3	119.293	-3.22557	0.375129	-8.59855	8.07307e-18	1.45447e-15	ENSMUSG00000032036	chr9	34397190	34948012	protein_coding
Troap	60.0763	-5.97893	0.695512	-8.59644	8.22264e-18	1.46807e-15	ENSMUSG00000032783	chr15	98972456	98981290	protein_coding
Hrob	52.6647	-6.38715	0.745048	-8.5728	1.00996e-17	1.78709e-15	ENSMUSG00000034773	chr11	102139708	102156013	protein_coding
Lig1	723.591	-1.98574	0.232605	-8.53697	1.37784e-17	2.41646e-15	ENSMUSG00000056394	chr7	13011239	13045350	protein_coding
Fanca	298.37	-2.6611	0.311769	-8.53548	1.39579e-17	2.42647e-15	ENSMUSG00000032815	chr8	123995039	124045315	protein_coding
Sapcd2	75.4172	-5.04128	0.597119	-8.44268	3.1015e-17	5.34483e-15	ENSMUSG00000026955	chr2	25262333	25268225	protein_coding
Pinlyp	147.127	-4.2224	0.502575	-8.40155	4.40634e-17	7.52801e-15	ENSMUSG00000011632	chr7	24241083	24245543	protein_coding
Omp	1080.77	-1.76485	0.210161	-8.3976	4.55701e-17	7.71888e-15	ENSMUSG00000074006	chr7	97792566	97794709	protein_coding
Ticrr	120.859	-4.12505	0.4929	-8.36895	5.81317e-17	9.76317e-15	ENSMUSG00000046591	chr7	79309944	79347896	protein_coding
Fam83e	584.17	-2.83834	0.341196	-8.31879	8.88658e-17	1.47995e-14	ENSMUSG00000054161	chr7	45370636	45378916	protein_coding
Mab21l3	1674.59	-1.1091	0.133381	-8.31528	9.15331e-17	1.51167e-14	ENSMUSG00000044313	chr3	101720392	101756275	protein_coding
Smc2	500.775	-1.60906	0.194052	-8.29194	1.11421e-16	1.82491e-14	ENSMUSG00000028312	chr4	52439243	52488260	protein_coding
Rad54l	103.015	-3.79735	0.459635	-8.26166	1.43662e-16	2.29604e-14	ENSMUSG00000028702	chr4	115951461	115980887	protein_coding
Ccne1	231.821	-2.26902	0.27575	-8.22856	1.89482e-16	2.98028e-14	ENSMUSG00000002068	chr7	37797409	37806959	protein_coding
Polq	56.8669	-4.38208	0.534147	-8.20388	2.32749e-16	3.6036e-14	ENSMUSG00000034206	chr16	36832148	36915779	protein_coding
Ndc80	114.006	-4.01303	0.489397	-8.19993	2.40523e-16	3.6951e-14	ENSMUSG00000024056	chr17	71803095	71833852	protein_coding
Kif20b	209.179	-2.47939	0.302448	-8.19774	2.44939e-16	3.734e-14	ENSMUSG00000024795	chr19	34899761	34953145	protein_coding
Chtf18	117.371	-3.3675	0.411101	-8.1914	2.58207e-16	3.87662e-14	ENSMUSG00000019214	chr17	25937900	25946393	protein_coding
Fdps	3441.73	-1.57617	0.192413	-8.19157	2.57836e-16	3.87662e-14	ENSMUSG00000059743	chr3	89000895	89009266	protein_coding
Aurkb	263.954	-6.24637	0.76283	-8.18842	2.64688e-16	3.91462e-14	ENSMUSG00000020897	chr11	68936473	68942490	protein_coding
Fignl1	188.555	-3.11533	0.38044	-8.18876	2.63938e-16	3.91462e-14	ENSMUSG00000035455	chr11	11737431	11758962	protein_coding
Gstm7	381.985	-2.53792	0.310679	-8.16894	3.11103e-16	4.56699e-14	ENSMUSG00000004035	chr3	107833650	107839133	protein_coding
Slc39a2	443.47	-3.14248	0.385168	-8.15873	3.38566e-16	4.9336e-14	ENSMUSG00000072572	chr14	52130346	52134202	protein_coding
Slc35e2	2417.11	-1.49132	0.183196	-8.1406	3.93336e-16	5.68987e-14	ENSMUSG00000042202	chr4	155685873	155707797	protein_coding
Mgll	1087.01	-2.65199	0.326343	-8.1264	4.42225e-16	6.35074e-14	ENSMUSG00000033174	chr6	88701394	88805342	protein_coding
Gpsm2	577.95	-1.30174	0.160766	-8.09712	5.62754e-16	8.0235e-14	ENSMUSG00000027883	chr3	108585954	108629625	protein_coding
Elf5	766.18	-1.50423	0.185913	-8.09105	5.91516e-16	8.37333e-14	ENSMUSG00000027186	chr2	103242033	103281334	protein_coding
Rrm1	1702.45	-1.64428	0.203404	-8.08381	6.2775e-16	8.82323e-14	ENSMUSG00000030978	chr7	102090902	102118978	protein_coding
Ska1	28.3755	-8.2116	1.02048	-8.04679	8.49939e-16	1.16557e-13	ENSMUSG00000036223	chr18	74328370	74340889	protein_coding
Mis18bp1	107.087	-2.66082	0.330686	-8.04638	8.52801e-16	1.16557e-13	ENSMUSG00000047534	chr12	65179508	65219378	protein_coding
Cdh24	501.93	-1.3378	0.16623	-8.04789	8.42309e-16	1.16557e-13	ENSMUSG00000059674	chr14	54868688	54878821	protein_coding
Cdc25c	52.5041	-6.16527	0.773899	-7.9665	1.63234e-15	2.21573e-13	ENSMUSG00000044201	chr18	34866046	34884586	protein_coding
Rad51ap1	63.4542	-3.94774	0.496793	-7.94645	1.91932e-15	2.58756e-13	ENSMUSG00000030346	chr6	126900013	126916550	protein_coding
Tcf19	154.997	-2.94674	0.371901	-7.92346	2.31e-15	3.09322e-13	ENSMUSG00000050410	chr17	35823631	35827721	protein_coding
Gale	1414.3	-1.49893	0.190181	-7.8816	3.23215e-15	4.21412e-13	ENSMUSG00000028671	chr4	135691038	135695489	protein_coding
Cdhr2	183.15	-2.64034	0.336553	-7.84525	4.32108e-15	5.56073e-13	ENSMUSG00000034918	chr13	54849274	54884475	protein_coding
Zwilch	144.787	-2.34776	0.300784	-7.80547	5.92779e-15	7.57916e-13	ENSMUSG00000032400	chr9	64044426	64080386	protein_coding
Adgre5	2392.69	-1.08085	0.138703	-7.79254	6.56745e-15	8.29005e-13	ENSMUSG00000002885	chr8	84449880	84467955	protein_coding
Oip5	46.8071	-3.22819	0.415616	-7.76723	8.02217e-15	9.99896e-13	ENSMUSG00000072980	chr2	119439993	119448950	protein_coding
Plch2	1112.76	-1.24156	0.15983	-7.76802	7.97243e-15	9.99896e-13	ENSMUSG00000029055	chr4	155067572	155141241	protein_coding
Prap1	15087.5	-2.26542	0.291758	-7.76474	8.18128e-15	1.00973e-12	ENSMUSG00000025467	chr7	139673308	139677113	protein_coding
Kazn	7785.02	-1.40185	0.180548	-7.7644	8.20294e-15	1.00973e-12	ENSMUSG00000040606	chr4	141829701	142205056	protein_coding
Sphkap	239.186	-3.44512	0.44722	-7.7034	1.32491e-14	1.62081e-12	ENSMUSG00000026163	chr1	83231860	83385921	protein_coding
ENSMUSG00000120992	6665.96	-2.11859	0.275535	-7.68899	1.48307e-14	1.80316e-12	ENSMUSG00000120992	chr17	35215654	35219393	lncRNA
Ercc6l	124.313	-3.24441	0.422544	-7.67827	1.61254e-14	1.94861e-12	ENSMUSG00000051220	chrX	101185322	101200697	protein_coding
Prl6a1	478.022	-1.65587	0.216373	-7.65286	1.96553e-14	2.36078e-12	ENSMUSG00000069259	chr13	27496610	27503235	protein_coding
Tspan1	5846.38	-1.40042	0.183099	-7.64845	2.03412e-14	2.42844e-12	ENSMUSG00000028699	chr4	116019066	116024798	protein_coding
Wdr90	561.289	-1.52778	0.1999	-7.64273	2.12666e-14	2.52373e-12	ENSMUSG00000073434	chr17	26063745	26080475	protein_coding
Timeless	212.919	-2.35063	0.307985	-7.6323	2.30608e-14	2.72035e-12	ENSMUSG00000039994	chr10	128067934	128088810	protein_coding
Gm7694	765.831	-1.31547	0.172589	-7.62198	2.49805e-14	2.91522e-12	ENSMUSG00000102752	chr1	170125768	170133901	protein_coding
A530020G20Rik	613.723	-1.01351	0.13301	-7.6198	2.54071e-14	2.94455e-12	ENSMUSG00000097124	chr3	121325268	121329855	lncRNA
Pik3r3	1843.11	-1.35084	0.177776	-7.59859	2.99386e-14	3.4099e-12	ENSMUSG00000028698	chr4	116078815	116160253	protein_coding
Dtl	216.205	-2.6986	0.355221	-7.59695	3.03195e-14	3.43356e-12	ENSMUSG00000037474	chr1	191269468	191307656	protein_coding
Sgo2a	54.616	-4.25313	0.560277	-7.59112	3.17156e-14	3.57124e-12	ENSMUSG00000026039	chr1	58035130	58065058	protein_coding
Mst1r	285.591	-1.2672	0.167496	-7.56553	3.86277e-14	4.32499e-12	ENSMUSG00000032584	chr9	107784072	107797582	protein_coding
Tmem35b	684.331	-1.16149	0.153955	-7.54436	4.5452e-14	5.06049e-12	ENSMUSG00000070737	chr4	127017484	127023437	protein_coding
Tedc1	511.186	-1.05998	0.140566	-7.54078	4.67151e-14	5.14333e-12	ENSMUSG00000037466	chr12	113120041	113129668	protein_coding
Egfl6	2227.41	-1.77481	0.235526	-7.53553	4.8635e-14	5.32513e-12	ENSMUSG00000000402	chrX	165306003	165368716	protein_coding
Idi1	856.743	-1.3907	0.186051	-7.47486	7.72883e-14	8.36995e-12	ENSMUSG00000058258	chr13	8935537	8942487	protein_coding
Arhgap19	280.856	-1.66837	0.223726	-7.45723	8.83598e-14	9.43982e-12	ENSMUSG00000025154	chr19	41755027	41790486	protein_coding
Mvd	1004.38	-1.59294	0.213621	-7.45688	8.85966e-14	9.43982e-12	ENSMUSG00000006517	chr8	123160340	123170161	protein_coding
Ret	223.61	-3.55259	0.479319	-7.41175	1.24648e-13	1.321e-11	ENSMUSG00000030110	chr6	118128706	118174679	protein_coding
Elovl6	592.639	-1.12064	0.151303	-7.40658	1.29597e-13	1.35891e-11	ENSMUSG00000041220	chr3	129326004	129432144	protein_coding
Notch3	877.229	-1.72857	0.234052	-7.3854	1.51992e-13	1.57706e-11	ENSMUSG00000038146	chr17	32339794	32385826	protein_coding
Fut2	1927.9	-2.08112	0.282535	-7.36589	1.75969e-13	1.80692e-11	ENSMUSG00000055978	chr7	45298015	45315818	protein_coding
Nt5dc2	267.527	-1.89433	0.257775	-7.34879	2.00015e-13	2.04325e-11	ENSMUSG00000071547	chr14	30853010	30861081	protein_coding
E2f1	212.369	-2.2038	0.301072	-7.31986	2.48238e-13	2.49725e-11	ENSMUSG00000027490	chr2	154401327	154411812	protein_coding
Hells	405.805	-1.74571	0.238605	-7.31631	2.54879e-13	2.55111e-11	ENSMUSG00000025001	chr19	38919359	38959495	protein_coding
Dscc1	18.2852	-7.57856	1.03652	-7.31151	2.64165e-13	2.63077e-11	ENSMUSG00000022422	chr15	54939495	54953887	protein_coding
Fbxl19	1943.6	-1.0429	0.142674	-7.30968	2.67787e-13	2.6535e-11	ENSMUSG00000030811	chr7	127343715	127368655	protein_coding
Pole	379.41	-1.7417	0.23894	-7.28926	3.11659e-13	3.05765e-11	ENSMUSG00000007080	chr5	110434172	110485340	protein_coding
Lrp8	456.781	-1.50509	0.206689	-7.2819	3.29143e-13	3.21328e-11	ENSMUSG00000028613	chr4	107659066	107734037	protein_coding
Cenph	81.2564	-2.23933	0.307554	-7.28108	3.31164e-13	3.21716e-11	ENSMUSG00000045273	chr13	100896182	100912407	protein_coding
BC055324	129.454	-1.58363	0.218091	-7.26132	3.83326e-13	3.66993e-11	ENSMUSG00000041406	chr1	163773562	163822365	protein_coding
Pkmyt1	262.577	-1.62821	0.224701	-7.24613	4.28846e-13	4.086e-11	ENSMUSG00000023908	chr17	23945310	23955709	protein_coding
Cdt1	373.95	-1.54907	0.213872	-7.24297	4.38958e-13	4.15607e-11	ENSMUSG00000006585	chr8	123294754	123300293	protein_coding
Sgo1	84.2399	-3.98846	0.551715	-7.22919	4.85882e-13	4.50837e-11	ENSMUSG00000023940	chr17	53981814	53996361	protein_coding
Spc25	171.351	-2.31727	0.320569	-7.22861	4.87964e-13	4.50837e-11	ENSMUSG00000005233	chr2	69024239	69036538	protein_coding
Sgsm1	2194.5	-1.60541	0.222611	-7.21171	5.52531e-13	5.06947e-11	ENSMUSG00000042216	chr5	113391086	113458652	protein_coding
Papss2	278.066	-2.24222	0.311343	-7.20179	5.94272e-13	5.42732e-11	ENSMUSG00000024899	chr19	32573190	32644587	protein_coding
Cacng8	18.4212	-7.58918	1.05614	-7.1858	6.68167e-13	6.07419e-11	ENSMUSG00000053395	chr7	3439199	3464164	protein_coding
Mcm4	1192	-1.56963	0.218643	-7.17897	7.02404e-13	6.35627e-11	ENSMUSG00000022673	chr16	15441761	15455264	protein_coding
Slc16a3	1290.93	-2.41651	0.337024	-7.17013	7.49275e-13	6.7496e-11	ENSMUSG00000025161	chr11	120839306	120851694	protein_coding
Castor2	1403.24	-1.38185	0.19379	-7.13063	9.99111e-13	8.95945e-11	ENSMUSG00000015944	chr5	134128550	134173182	protein_coding
Ucp2	13878.7	-1.59472	0.223761	-7.12692	1.02636e-12	9.16236e-11	ENSMUSG00000033685	chr7	100142544	100151227	protein_coding
Brip1	110.094	-2.6312	0.369932	-7.11265	1.13837e-12	1.01167e-10	ENSMUSG00000034329	chr11	85948964	86092019	protein_coding
Mov10	980.811	-1.24996	0.176458	-7.08364	1.4042e-12	1.23682e-10	ENSMUSG00000002227	chr3	104702152	104725879	protein_coding
Dhcr24	36833.2	-1.25136	0.17705	-7.06781	1.57403e-12	1.38027e-10	ENSMUSG00000034926	chr4	106418235	106446310	protein_coding
Dna2	137.537	-2.2337	0.316734	-7.0523	1.75978e-12	1.5271e-10	ENSMUSG00000036875	chr10	62782805	62809964	protein_coding
Pola2	396.684	-1.44733	0.20524	-7.05193	1.76459e-12	1.5271e-10	ENSMUSG00000024833	chr19	5990570	6014230	protein_coding
Isyna1	18541.4	-2.22257	0.315323	-7.04855	1.80788e-12	1.55776e-10	ENSMUSG00000019139	chr8	71047023	71049940	protein_coding
Mybl2	134.318	-2.23279	0.317233	-7.03833	1.94553e-12	1.66192e-10	ENSMUSG00000017861	chr2	162896607	162926608	protein_coding
Scd1	2143.7	-1.65311	0.235166	-7.02954	2.07216e-12	1.76249e-10	ENSMUSG00000037071	chr19	44382894	44396318	protein_coding
Cchcr1	544.912	-1.01088	0.14415	-7.0127	2.33757e-12	1.97132e-10	ENSMUSG00000040312	chr17	35827997	35841912	protein_coding
Fut8	1876.42	-1.3618	0.194404	-7.00499	2.47009e-12	2.07425e-10	ENSMUSG00000021065	chr12	77284899	77523112	protein_coding
Cip2a	233.379	-1.93916	0.277012	-7.00026	2.55481e-12	2.13634e-10	ENSMUSG00000033031	chr16	48814548	48840072	protein_coding
Abca7	1148.07	-1.52957	0.219553	-6.96676	3.24333e-12	2.68939e-10	ENSMUSG00000035722	chr10	79832328	79851406	protein_coding
Cdca5	159.42	-2.05662	0.295924	-6.94982	3.65743e-12	3.02012e-10	ENSMUSG00000024791	chr19	6135013	6141807	protein_coding
Atad2	493.107	-1.67996	0.24267	-6.92281	4.42778e-12	3.64107e-10	ENSMUSG00000022360	chr15	57957440	57998478	protein_coding
Lrrc45	1280.22	-1.17285	0.169499	-6.91949	4.53262e-12	3.71188e-10	ENSMUSG00000025145	chr11	120604751	120611954	protein_coding
Parpbp	61.1493	-2.49548	0.36068	-6.91881	4.55459e-12	3.71452e-10	ENSMUSG00000035365	chr10	87927294	87982803	protein_coding
Haspin	140.47	-1.87023	0.271091	-6.8989	5.2407e-12	4.25657e-10	ENSMUSG00000050107	chr11	73026311	73029120	protein_coding
Myb	407.045	-2.48431	0.362597	-6.85144	7.31101e-12	5.88982e-10	ENSMUSG00000019982	chr10	21000834	21036883	protein_coding
Hmgcs1	2573.91	-1.13297	0.165937	-6.82773	8.62693e-12	6.9218e-10	ENSMUSG00000093930	chr13	120151915	120169796	protein_coding
Ckap2	205.616	-2.14171	0.31411	-6.81835	9.20912e-12	7.35913e-10	ENSMUSG00000037725	chr8	22658176	22675835	protein_coding
Nsl1	55.2702	-3.32847	0.489358	-6.8017	1.03391e-11	8.22891e-10	ENSMUSG00000062510	chr1	190795209	190818671	protein_coding
Ska3	76.6356	-3.45083	0.509952	-6.76697	1.31506e-11	1.03011e-09	ENSMUSG00000021965	chr14	58044018	58063642	protein_coding
Suox	180.404	-1.30874	0.193477	-6.76432	1.33937e-11	1.04093e-09	ENSMUSG00000049858	chr10	128505763	128509942	protein_coding
Neurl1b	65.8097	-3.31551	0.490624	-6.75776	1.40145e-11	1.08492e-09	ENSMUSG00000034413	chr17	26633803	26665323	protein_coding
Arhgef39	87.8092	-2.68379	0.397692	-6.7484	1.49485e-11	1.15272e-09	ENSMUSG00000051517	chr4	43496142	43499695	protein_coding
Fcna	1224.1	-3.21985	0.477417	-6.74432	1.53744e-11	1.18097e-09	ENSMUSG00000026938	chr2	25514678	25518042	protein_coding
9130230L23Rik	517.292	-1.70269	0.252716	-6.73757	1.61057e-11	1.22763e-09	ENSMUSG00000054598	chr5	66136701	66161628	lncRNA
Alox15	337.402	-1.97947	0.29765	-6.65034	2.92413e-11	2.17859e-09	ENSMUSG00000018924	chr11	70234978	70242857	protein_coding
Pcyt2	1304.05	-1.04645	0.157513	-6.64353	3.06251e-11	2.26466e-09	ENSMUSG00000025137	chr11	120500913	120508762	protein_coding
Alox12	188.749	-3.09632	0.466927	-6.63127	3.32822e-11	2.42495e-09	ENSMUSG00000000320	chr11	70132283	70146179	protein_coding
Arhgap11a	560.801	-1.69044	0.254901	-6.63174	3.31746e-11	2.42495e-09	ENSMUSG00000041219	chr2	113661837	113679006	protein_coding
Ints1	2505.57	-1.12317	0.169408	-6.62996	3.35783e-11	2.43756e-09	ENSMUSG00000029547	chr5	139737037	139761429	protein_coding
Acat2	1260.8	-1.355	0.204633	-6.62161	3.55317e-11	2.5606e-09	ENSMUSG00000023832	chr17	13161777	13179634	protein_coding
Dnmt1	1825.56	-1.42747	0.215936	-6.61061	3.82749e-11	2.73838e-09	ENSMUSG00000004099	chr9	20818505	20871184	protein_coding
Cenpm	54.2401	-4.47929	0.679579	-6.59126	4.36101e-11	3.0929e-09	ENSMUSG00000068101	chr15	82117980	82128949	protein_coding
Pcx	1109.66	-1.46792	0.222873	-6.58636	4.5075e-11	3.17899e-09	ENSMUSG00000024892	chr19	4560500	4671780	protein_coding
Lmntd2	302.278	-1.57935	0.240034	-6.57969	4.71424e-11	3.31301e-09	ENSMUSG00000025500	chr7	140789905	140793993	protein_coding
Sqle	2213.96	-1.22348	0.186849	-6.54797	5.83248e-11	4.07e-09	ENSMUSG00000022351	chr15	59186926	59203041	protein_coding
Pik3r5	203.936	-1.64565	0.252894	-6.50727	7.6529e-11	5.26615e-09	ENSMUSG00000020901	chr11	68322947	68388675	protein_coding
Dennd2a	1631.96	-1.49408	0.230688	-6.4766	9.38102e-11	6.32357e-09	ENSMUSG00000038456	chr6	39439312	39534801	protein_coding
Ptms	3571	-1.12956	0.174773	-6.463	1.02647e-10	6.89578e-09	ENSMUSG00000030122	chr6	124890644	124897066	protein_coding
Clspn	170.268	-5.99783	0.929212	-6.45475	1.08398e-10	7.25756e-09	ENSMUSG00000042489	chr4	126450728	126487696	protein_coding
Wdhd1	142.044	-2.04487	0.316926	-6.45222	1.10226e-10	7.35509e-09	ENSMUSG00000037572	chr14	47478401	47514314	protein_coding
Steap3	269.043	-1.68177	0.261295	-6.43628	1.2244e-10	8.12549e-09	ENSMUSG00000026389	chr1	120118487	120200435	protein_coding
Sdk1	35.2081	-4.16011	0.647101	-6.42884	1.28581e-10	8.46586e-09	ENSMUSG00000039683	chr5	141227245	142201341	protein_coding
Pask	365.96	-1.07289	0.166951	-6.42639	1.30668e-10	8.57478e-09	ENSMUSG00000026274	chr1	93236492	93271204	protein_coding
Atp13a4	246.257	-2.51506	0.392555	-6.4069	1.48509e-10	9.67436e-09	ENSMUSG00000038094	chr16	29214671	29363682	protein_coding
Incenp	700.012	-1.80041	0.281028	-6.40651	1.48889e-10	9.67436e-09	ENSMUSG00000024660	chr19	9849660	9876915	protein_coding
Dbp	337.776	-1.12712	0.17592	-6.40701	1.48406e-10	9.67436e-09	ENSMUSG00000059824	chr7	45354512	45359627	protein_coding
Sema3f	13826.5	-1.07489	0.168305	-6.38657	1.69647e-10	1.09513e-08	ENSMUSG00000034684	chr9	107558699	107587674	protein_coding
Gas2l3	138.411	-3.08547	0.483873	-6.37661	1.81049e-10	1.16495e-08	ENSMUSG00000074802	chr10	89244685	89279829	protein_coding
Cdc25b	155.178	-2.50082	0.39271	-6.36811	1.91366e-10	1.22734e-08	ENSMUSG00000027330	chr2	131028869	131040417	protein_coding
Krt79	43.6032	-2.96204	0.465816	-6.35881	2.03324e-10	1.29565e-08	ENSMUSG00000061397	chr15	101837767	101848759	protein_coding
Gm13032	561.602	-1.52844	0.241381	-6.33206	2.41904e-10	1.5171e-08	ENSMUSG00000085918	chr4	140538304	140544822	lncRNA
Atp13a2	2994.22	-1.08697	0.171844	-6.32534	2.52668e-10	1.57961e-08	ENSMUSG00000036622	chr4	140714184	140734641	protein_coding
Ppard	1227.61	-1.33747	0.211767	-6.31575	2.68847e-10	1.67022e-08	ENSMUSG00000002250	chr17	28451674	28520448	protein_coding
Depdc1b	21.7016	-4.4945	0.713963	-6.29514	3.07122e-10	1.89612e-08	ENSMUSG00000021697	chr13	108452866	108544316	protein_coding
E2f7	75.3278	-2.62089	0.417165	-6.28262	3.32906e-10	2.04892e-08	ENSMUSG00000020185	chr10	110581300	110623245	protein_coding
Gpc2	72.4768	-1.88896	0.300951	-6.27662	3.46015e-10	2.12301e-08	ENSMUSG00000029510	chr5	138271917	138278267	protein_coding
Clca1	393.727	-6.02375	0.964562	-6.24506	4.23639e-10	2.55966e-08	ENSMUSG00000028255	chr3	144709578	144738537	protein_coding
Tgm2	31907.9	-1.64791	0.263906	-6.24429	4.25716e-10	2.56439e-08	ENSMUSG00000037820	chr2	157958322	157988356	protein_coding
Ablim3	971.319	-1.42247	0.228035	-6.23796	4.43312e-10	2.66229e-08	ENSMUSG00000032735	chr18	61932463	62044895	protein_coding
Mgat4c	1565.26	-3.77156	0.607749	-6.20579	5.44213e-10	3.2388e-08	ENSMUSG00000019888	chr10	101517348	102227330	protein_coding
Lmnb1	1260.36	-1.16733	0.188138	-6.20462	5.48283e-10	3.25326e-08	ENSMUSG00000024590	chr18	56840885	56886496	protein_coding
Cit	188.243	-4.61311	0.744086	-6.19969	5.65728e-10	3.33678e-08	ENSMUSG00000029516	chr5	115983337	116147006	protein_coding
Mapk15	136.351	-1.35795	0.219032	-6.19978	5.65404e-10	3.33678e-08	ENSMUSG00000063704	chr15	75865618	75871003	protein_coding
Mfsd13a	641.605	-1.07321	0.17384	-6.17354	6.6779e-10	3.88984e-08	ENSMUSG00000025227	chr19	46329560	46363691	protein_coding
Btbd17	539.721	-1.55097	0.251549	-6.1657	7.01741e-10	4.04276e-08	ENSMUSG00000000202	chr11	114682043	114686771	protein_coding
Trp53inp2	3215.29	-1.01701	0.165017	-6.16304	7.13617e-10	4.09927e-08	ENSMUSG00000038375	chr2	155222979	155231770	protein_coding
Ssbp4	3584.87	-1.22148	0.198436	-6.15551	7.48376e-10	4.28651e-08	ENSMUSG00000070003	chr8	71050140	71061522	protein_coding
Ulbp1	609.897	-1.7135	0.278493	-6.15277	7.61403e-10	4.34261e-08	ENSMUSG00000079685	chr10	7390362	7423638	protein_coding
Fabp5	4256.35	-1.98271	0.322559	-6.14682	7.90528e-10	4.4762e-08	ENSMUSG00000027533	chr3	10077608	10081667	protein_coding
Sema4g	332.9	-1.69046	0.275151	-6.14376	8.05908e-10	4.53735e-08	ENSMUSG00000025207	chr19	44977540	44991836	protein_coding
Abca4	1846.79	-1.40891	0.229389	-6.14201	8.14827e-10	4.57457e-08	ENSMUSG00000028125	chr3	121838092	121973772	protein_coding
Ldhd	932.873	-1.25904	0.205425	-6.12896	8.84535e-10	4.92408e-08	ENSMUSG00000031958	chr8	112350417	112357006	protein_coding
H2ax	948.292	-1.29381	0.211324	-6.12241	9.21695e-10	5.10228e-08	ENSMUSG00000049932	chr9	44245991	44247374	protein_coding
Cenpi	63.1242	-3.04083	0.497094	-6.11722	9.5223e-10	5.25663e-08	ENSMUSG00000031262	chrX	133208833	133263388	protein_coding
Rad18	223.887	-1.17358	0.192163	-6.10719	1.014e-09	5.58206e-08	ENSMUSG00000030254	chr6	112596811	112673647	protein_coding
Penk	3812.76	-3.86706	0.637513	-6.06585	1.3126e-09	7.0688e-08	ENSMUSG00000045573	chr4	4133531	4138819	protein_coding
Krt12	155.434	-1.36381	0.226063	-6.03286	1.61085e-09	8.53576e-08	ENSMUSG00000020912	chr11	99306492	99313085	protein_coding
Krt4	8633.51	-4.09378	0.679326	-6.02623	1.67824e-09	8.84558e-08	ENSMUSG00000059668	chr15	101826970	101833170	protein_coding
Ube2t	81.058	-1.71105	0.284957	-6.0046	1.91804e-09	1.00031e-07	ENSMUSG00000026429	chr1	134890303	134901900	protein_coding
Lss	2005.5	-1.15604	0.192734	-5.99813	1.99598e-09	1.0328e-07	ENSMUSG00000033105	chr10	76367422	76392972	protein_coding
Cntrob	365.387	-1.12404	0.188108	-5.9755	2.29382e-09	1.17465e-07	ENSMUSG00000032782	chr11	69190313	69214601	protein_coding
Krt87	2609.8	-3.92792	0.657612	-5.973	2.32924e-09	1.18665e-07	ENSMUSG00000047641	chr15	101328919	101336685	protein_coding
Fbxo48	18.0971	-6.97755	1.17185	-5.95429	2.61199e-09	1.32052e-07	ENSMUSG00000044966	chr11	16901375	16904772	protein_coding
Cep55	137.104	-4.23255	0.711045	-5.95258	2.63947e-09	1.33102e-07	ENSMUSG00000024989	chr19	38043459	38062871	protein_coding
Cenpf	314.925	-7.02118	1.18166	-5.9418	2.81913e-09	1.41085e-07	ENSMUSG00000026605	chr1	189372803	189420283	protein_coding
Cenpn	74.8306	-2.05901	0.347409	-5.92676	3.08976e-09	1.53466e-07	ENSMUSG00000031756	chr8	117648469	117668246	protein_coding
Adcy7	161.52	-1.67206	0.282279	-5.92342	3.15312e-09	1.56221e-07	ENSMUSG00000031659	chr8	88999031	89056590	protein_coding
Iqgap2	2320.55	-1.53698	0.259822	-5.91549	3.30894e-09	1.63533e-07	ENSMUSG00000021676	chr13	95763682	96028991	protein_coding
Rasgrp1	100.151	-1.64242	0.279044	-5.88586	3.9598e-09	1.92814e-07	ENSMUSG00000027347	chr2	117110474	117173482	protein_coding
Plk4	147.663	-1.41028	0.239891	-5.87883	4.13182e-09	1.99805e-07	ENSMUSG00000025758	chr3	40754454	40771318	protein_coding
Mospd3	854.137	-1.37234	0.233747	-5.87106	4.33021e-09	2.08291e-07	ENSMUSG00000037221	chr5	137594907	137599320	protein_coding
C130073F10Rik	342.154	-1.42107	0.243133	-5.84484	5.07067e-09	2.40408e-07	ENSMUSG00000046133	chr4	101747217	101760875	protein_coding
Scnn1b	1969.53	-1.54562	0.264868	-5.83545	5.36465e-09	2.53739e-07	ENSMUSG00000030873	chr7	121464261	121517737	protein_coding
Bub1	158.291	-5.16587	0.892966	-5.78507	7.24815e-09	3.36402e-07	ENSMUSG00000027379	chr2	127643036	127673785	protein_coding
Abca2	1942.25	-1.23753	0.214523	-5.76873	7.98709e-09	3.65828e-07	ENSMUSG00000026944	chr2	25318715	25338552	protein_coding
Palm	403.304	-1.08776	0.188576	-5.7683	8.00755e-09	3.65828e-07	ENSMUSG00000035863	chr10	79629406	79656730	protein_coding
Hmmr	196.088	-5.43974	0.945983	-5.75035	8.90573e-09	4.03876e-07	ENSMUSG00000020330	chr11	40592222	40624249	protein_coding
Pkn3	663.976	-1.46154	0.254704	-5.73818	9.57018e-09	4.30315e-07	ENSMUSG00000026785	chr2	29967696	29981034	protein_coding
Foxa1	864.098	-1.2135	0.211803	-5.72937	1.00805e-08	4.51982e-07	ENSMUSG00000035451	chr12	57587414	57593702	protein_coding
Padi2	61645.7	-1.44099	0.251544	-5.72858	1.01276e-08	4.53069e-07	ENSMUSG00000028927	chr4	140633655	140679897	protein_coding
Lzts3	1836.26	-1.63529	0.285658	-5.72466	1.03638e-08	4.6259e-07	ENSMUSG00000037703	chr2	130474759	130484723	protein_coding
Tmem97	320.698	-1.37822	0.241455	-5.70797	1.14333e-08	5.05583e-07	ENSMUSG00000037278	chr11	78432643	78441603	protein_coding
Mfsd12	374.396	-1.00908	0.176795	-5.70765	1.14546e-08	5.05583e-07	ENSMUSG00000034854	chr10	81193325	81202059	protein_coding
Pmvk	417.589	-1.4197	0.248943	-5.7029	1.17787e-08	5.16437e-07	ENSMUSG00000027952	chr3	89361848	89376320	protein_coding
Tex2	26777.6	-1.10253	0.193547	-5.69645	1.22324e-08	5.3397e-07	ENSMUSG00000040548	chr11	106392973	106504249	protein_coding
Selenbp1	3891.65	-1.2824	0.226421	-5.66379	1.48065e-08	6.39292e-07	ENSMUSG00000068874	chr3	94840367	94852069	protein_coding
Cntnap1	466.666	-1.52345	0.269174	-5.65974	1.51605e-08	6.50325e-07	ENSMUSG00000017167	chr11	101061349	101081550	protein_coding
Plekhg6	637.376	-1.01178	0.179007	-5.65216	1.58448e-08	6.78213e-07	ENSMUSG00000038167	chr6	125339623	125357756	protein_coding
Kcne3	357.532	-1.66946	0.295508	-5.64946	1.6095e-08	6.87438e-07	ENSMUSG00000035165	chr7	99825709	99834076	protein_coding
Smc4	684.521	-1.16783	0.206836	-5.64617	1.64062e-08	6.99222e-07	ENSMUSG00000034349	chr3	68912071	68941956	protein_coding
Rfng	658.182	-1.37807	0.244161	-5.64407	1.66072e-08	7.04758e-07	ENSMUSG00000025158	chr11	120671572	120675033	protein_coding
Spdl1	133.972	-1.28462	0.228203	-5.62927	1.80978e-08	7.61489e-07	ENSMUSG00000069910	chr11	34700017	34724468	protein_coding
Mvk	571.966	-1.03981	0.184749	-5.62823	1.82069e-08	7.64458e-07	ENSMUSG00000041939	chr5	114582330	114598652	protein_coding
Six5	321.763	-1.06317	0.188979	-5.62589	1.8455e-08	7.73238e-07	ENSMUSG00000040841	chr7	18828519	18832474	protein_coding
Kifc5b	93.1471	-1.84708	0.328643	-5.62031	1.90612e-08	7.91939e-07	ENSMUSG00000024301	chr17	27136065	27151557	protein_coding
Gmnn	144.365	-1.69616	0.303155	-5.59502	2.20602e-08	9.08917e-07	ENSMUSG00000006715	chr13	24935828	24945906	protein_coding
1810019D21Rik	395.616	-1.35581	0.243921	-5.5584	2.72251e-08	1.10112e-06	ENSMUSG00000086390	chr8	106862013	106865358	lncRNA
Dck	212.105	-1.30497	0.235264	-5.54682	2.90907e-08	1.17417e-06	ENSMUSG00000029366	chr5	88912855	88931140	protein_coding
Mx1	380.285	-1.79104	0.323142	-5.54258	2.9804e-08	1.19808e-06	ENSMUSG00000000386	chr16	97248235	97264107	protein_coding
St6galnac2	643.728	-1.22144	0.221026	-5.52623	3.27181e-08	1.30991e-06	ENSMUSG00000057286	chr11	116566129	116585694	protein_coding
Gm9195	494.682	-1.28101	0.231981	-5.52207	3.3503e-08	1.33863e-06	ENSMUSG00000109446	chr14	72663453	72729278	protein_coding
Rnf207	109.162	-1.21975	0.22159	-5.50455	3.7012e-08	1.4729e-06	ENSMUSG00000058498	chr4	152391476	152403450	protein_coding
Pkd1l2	31.4563	-4.07835	0.742902	-5.48975	4.02503e-08	1.59536e-06	ENSMUSG00000034416	chr8	117722418	117809188	protein_coding
Kif24	124.217	-1.99386	0.363402	-5.48666	4.09605e-08	1.61704e-06	ENSMUSG00000028438	chr4	41390745	41464887	protein_coding
Dhfr	125.489	-1.74674	0.318583	-5.48284	4.18551e-08	1.6458e-06	ENSMUSG00000021707	chr13	92491234	92525561	protein_coding
Msh6	1323.44	-1.08574	0.198136	-5.47979	4.25838e-08	1.67114e-06	ENSMUSG00000005370	chr17	88282490	88298320	protein_coding
Pgap1	702.468	-1.07182	0.195782	-5.47456	4.38608e-08	1.70773e-06	ENSMUSG00000073678	chr1	54512153	54596843	protein_coding
Gstt3	638.845	-1.19955	0.219193	-5.47258	4.43533e-08	1.72014e-06	ENSMUSG00000001665	chr10	75609949	75617248	protein_coding
Gm3571	50.6231	-1.99016	0.365181	-5.44978	5.0431e-08	1.94066e-06	ENSMUSG00000090610	chr10	93614522	93615581	processed_pseudogene
Entrep3	286.005	-1.42123	0.261508	-5.43473	5.48783e-08	2.0915e-06	ENSMUSG00000032657	chr3	89090450	89096602	protein_coding
Tmprss4	4916.99	-1.00733	0.185464	-5.43144	5.59008e-08	2.12638e-06	ENSMUSG00000032091	chr9	45084024	45115390	protein_coding
Ttyh3	2245.15	-1.10228	0.203065	-5.42822	5.69188e-08	2.16095e-06	ENSMUSG00000036565	chr5	140606333	140634786	protein_coding
Tmem121	21.1574	-3.20076	0.590291	-5.42234	5.88228e-08	2.22048e-06	ENSMUSG00000049036	chr12	113149550	113153143	protein_coding
Camk1g	227.814	-2.45983	0.453854	-5.41988	5.96374e-08	2.24449e-06	ENSMUSG00000016179	chr1	193028654	193052606	protein_coding
Kcng1	126.155	-2.49012	0.461601	-5.39453	6.87014e-08	2.53071e-06	ENSMUSG00000074575	chr2	168102037	168123656	protein_coding
Orc1	87.4442	-1.45166	0.269222	-5.39207	6.96515e-08	2.56095e-06	ENSMUSG00000028587	chr4	108436620	108472030	protein_coding
Prim1	129.99	-1.86602	0.346129	-5.3911	7.00272e-08	2.57e-06	ENSMUSG00000025395	chr10	127851037	127865906	protein_coding
Chia1	74.4044	-1.68924	0.313639	-5.38595	7.20638e-08	2.62048e-06	ENSMUSG00000062778	chr3	106020545	106039436	protein_coding
Jak3	2493.94	-1.23297	0.229221	-5.37898	7.49109e-08	2.71405e-06	ENSMUSG00000031805	chr8	72128940	72143219	protein_coding
Fxyd4	330.736	-4.27346	0.798601	-5.35118	8.73827e-08	3.12027e-06	ENSMUSG00000004988	chr6	117910520	117914653	protein_coding
Hdac7	7659.83	-1.12807	0.211913	-5.32324	1.01938e-07	3.58828e-06	ENSMUSG00000022475	chr15	97690545	97742383	protein_coding
Cyp4a12a	150.412	-2.03921	0.38424	-5.30714	1.11361e-07	3.89233e-06	ENSMUSG00000066071	chr4	115156243	115190012	protein_coding
Trim59	457.815	-1.21512	0.22894	-5.3076	1.11081e-07	3.89233e-06	ENSMUSG00000034317	chr3	68942621	68952088	protein_coding
Kif18a	54.2397	-2.12529	0.400797	-5.30266	1.14125e-07	3.96101e-06	ENSMUSG00000027115	chr2	109111083	109172092	protein_coding
Map3k12	70.3873	-1.39915	0.263847	-5.30291	1.13974e-07	3.96101e-06	ENSMUSG00000023050	chr15	102406081	102425499	protein_coding
Tonsl	400.351	-1.329	0.250937	-5.29615	1.18272e-07	4.08347e-06	ENSMUSG00000059323	chr15	76510202	76524158	protein_coding
Frmd5	107.475	-2.34081	0.442192	-5.29366	1.19895e-07	4.13232e-06	ENSMUSG00000027238	chr2	121376010	121637568	protein_coding
Mns1	10.4652	-6.77499	1.28323	-5.27963	1.29442e-07	4.40014e-06	ENSMUSG00000032221	chr9	72345293	72369307	protein_coding
Mms22l	235.047	-1.55836	0.295219	-5.27864	1.30143e-07	4.41641e-06	ENSMUSG00000045751	chr4	24496451	24602950	protein_coding
Gm26226	215.19	-1.70622	0.323251	-5.27832	1.30374e-07	4.41665e-06	ENSMUSG00000064443	chr4	140645995	140646110	snRNA
Phtf1	421.71	-1.09692	0.208024	-5.27307	1.3416e-07	4.52943e-06	ENSMUSG00000058388	chr3	103875426	103931914	protein_coding
Haus8	252.751	-1.07986	0.204823	-5.27214	1.34844e-07	4.54479e-06	ENSMUSG00000035439	chr8	71701205	71725578	protein_coding
Gm6166	43.2352	-2.36786	0.450581	-5.25512	1.47929e-07	4.92714e-06	ENSMUSG00000074280	chr9	57391246	57391654	processed_pseudogene
Elapor2	136.142	-1.53673	0.292885	-5.24686	1.54716e-07	5.08484e-06	ENSMUSG00000056004	chr5	9316118	9531825	protein_coding
Gen1	129.711	-1.52449	0.290937	-5.23992	1.60646e-07	5.22773e-06	ENSMUSG00000051235	chr12	11288921	11315802	protein_coding
Rbl1	551.674	-1.14533	0.218827	-5.23393	1.65947e-07	5.38255e-06	ENSMUSG00000027641	chr2	156987813	157046454	protein_coding
Fbxo5	118.412	-1.741	0.332892	-5.22993	1.69571e-07	5.49111e-06	ENSMUSG00000019773	chr10	5749160	5755600	protein_coding
Fyb	105.087	-1.41168	0.26995	-5.22942	1.70042e-07	5.49737e-06	ENSMUSG00000022148	chr15	6552334	6692794	protein_coding
Klhdc8b	319.218	-1.11344	0.21316	-5.22349	1.75582e-07	5.63967e-06	ENSMUSG00000032609	chr9	108324835	108338780	protein_coding
Gm15600	75.2968	-1.82954	0.350562	-5.21887	1.80019e-07	5.72331e-06	ENSMUSG00000085969	chr9	24207435	24211553	lncRNA
Dscam	177.169	-2.14755	0.411922	-5.21349	1.85325e-07	5.84835e-06	ENSMUSG00000050272	chr16	96392040	96971952	protein_coding
Il24	277.123	-1.22904	0.235812	-5.21195	1.86861e-07	5.86919e-06	ENSMUSG00000026420	chr1	130809811	130815191	protein_coding
Recql4	61.8696	-2.27437	0.436772	-5.20723	1.9168e-07	5.99168e-06	ENSMUSG00000033762	chr15	76587753	76594748	protein_coding
Gm49636	92.1503	-2.92758	0.562297	-5.20646	1.92474e-07	6.00701e-06	ENSMUSG00000116814	chr16	29569628	29573130	lncRNA
E2f2	113.948	-2.7051	0.519829	-5.20382	1.95238e-07	6.08368e-06	ENSMUSG00000018983	chr4	135899705	135923368	protein_coding
Gm6667	6.77396	-6.14489	1.19315	-5.15016	2.60271e-07	7.8509e-06	ENSMUSG00000110787	chr10	3162803	3185033	unprocessed_pseudogene
Col8a1	512.189	-1.80158	0.350191	-5.14455	2.68168e-07	8.07683e-06	ENSMUSG00000068196	chr16	57444621	57575100	protein_coding
Cdh16	58.05	-3.13097	0.610207	-5.131	2.88214e-07	8.55827e-06	ENSMUSG00000031881	chr8	105328543	105351028	protein_coding
Lpcat4	2670.75	-1.12362	0.218993	-5.13083	2.88471e-07	8.55827e-06	ENSMUSG00000027134	chr2	112069813	112077456	protein_coding
Eme1	30.861	-2.94788	0.57461	-5.13023	2.89384e-07	8.57115e-06	ENSMUSG00000039055	chr11	94535822	94544790	protein_coding
Zan	63.6649	-1.96171	0.382422	-5.1297	2.90203e-07	8.57115e-06	ENSMUSG00000079173	chr5	137376899	137475326	protein_coding
Gm6560	299.662	-1.02567	0.200086	-5.12613	2.95761e-07	8.72231e-06	ENSMUSG00000104913	chr5	22929576	22931166	processed_pseudogene
Slc7a4	1034.77	-1.05188	0.205221	-5.12561	2.96576e-07	8.73334e-06	ENSMUSG00000022756	chr16	17389882	17401078	protein_coding
Gmpr	465.593	-1.18926	0.232044	-5.12514	2.97312e-07	8.74202e-06	ENSMUSG00000000253	chr13	45660920	45707276	protein_coding
Serping1	32.5288	-3.52839	0.689584	-5.1167	3.10925e-07	9.08837e-06	ENSMUSG00000023224	chr2	84595731	84605788	protein_coding
Spred3	518.342	-1.23235	0.241059	-5.11221	3.18409e-07	9.29341e-06	ENSMUSG00000037239	chr7	28858254	28869836	protein_coding
Tgfb3	1673.72	-1.03012	0.202026	-5.09895	3.41545e-07	9.89581e-06	ENSMUSG00000021253	chr12	86103519	86125815	protein_coding
Poc1a	111.445	-1.41812	0.278208	-5.09732	3.44489e-07	9.96655e-06	ENSMUSG00000023345	chr9	106158260	106227720	protein_coding
Ldha	23266.7	-1.02981	0.202251	-5.09176	3.54759e-07	1.02338e-05	ENSMUSG00000063229	chr7	46490899	46505051	protein_coding
Camk2b	186.713	-1.2671	0.24909	-5.08692	3.63933e-07	1.04832e-05	ENSMUSG00000057897	chr11	5919644	6016362	protein_coding
Chrna4	10.9859	-5.66196	1.11349	-5.08486	3.67899e-07	1.0582e-05	ENSMUSG00000027577	chr2	180660173	180685339	protein_coding
Cyfip2	126.418	-4.93714	0.972153	-5.07856	3.80301e-07	1.08913e-05	ENSMUSG00000020340	chr11	46084677	46203686	protein_coding
Slc27a2	1317.58	-1.7425	0.344111	-5.06379	4.11011e-07	1.16529e-05	ENSMUSG00000027359	chr2	126394327	126430163	protein_coding
Zfhx2	598.523	-1.12595	0.222513	-5.06016	4.18902e-07	1.18428e-05	ENSMUSG00000040721	chr14	55297719	55329781	protein_coding
Depdc1a	57.954	-5.47557	1.08353	-5.05343	4.33934e-07	1.22155e-05	ENSMUSG00000028175	chr3	159201070	159235592	protein_coding
Hirip3	229.231	-1.12733	0.22312	-5.05256	4.3592e-07	1.2254e-05	ENSMUSG00000042606	chr7	126461144	126464549	protein_coding
Slc39a10	1453.33	-1.02116	0.202455	-5.0439	4.56134e-07	1.27499e-05	ENSMUSG00000025986	chr1	46846704	46932012	protein_coding
Cxcl13	81.6807	-2.01506	0.400978	-5.02536	5.02478e-07	1.38115e-05	ENSMUSG00000023078	chr5	96104810	96108927	protein_coding
Il17rb	238.046	-2.19057	0.43699	-5.01286	5.36282e-07	1.46594e-05	ENSMUSG00000015966	chr14	29718092	29730853	protein_coding
Snhg7os	55.7534	-2.18897	0.4378	-4.99993	5.73524e-07	1.557e-05	ENSMUSG00000086775	chr2	26530384	26535956	lncRNA
Nrm	32.4052	-2.17612	0.435553	-4.99624	5.8459e-07	1.5827e-05	ENSMUSG00000059791	chr17	36172210	36176294	protein_coding
Add2	716.158	-3.5076	0.706984	-4.96135	7.00045e-07	1.8748e-05	ENSMUSG00000030000	chr6	86005663	86101391	protein_coding
D430020J02Rik	144.152	-1.44197	0.290897	-4.95697	7.16022e-07	1.91411e-05	ENSMUSG00000112980	chr12	116365567	116368830	lncRNA
Asb2	16.3335	-6.24164	1.25965	-4.95507	7.23044e-07	1.92598e-05	ENSMUSG00000021200	chr12	103287401	103322260	protein_coding
Blm	118.858	-1.69196	0.342588	-4.93876	7.86203e-07	2.08581e-05	ENSMUSG00000030528	chr7	80104481	80184867	protein_coding
mt-Ts2	48.2691	-2.69601	0.546342	-4.93465	8.02953e-07	2.1274e-05	ENSMUSG00000064365	chrM	11613	11671	Mt_tRNA
Acacb	591.767	-1.75202	0.355108	-4.93376	8.06628e-07	2.13428e-05	ENSMUSG00000042010	chr5	114284596	114388822	protein_coding
Podn	304.23	-1.57179	0.319589	-4.91817	8.73574e-07	2.29914e-05	ENSMUSG00000028600	chr4	107871988	107953642	protein_coding
Hmcn1	51.5508	-2.61062	0.532151	-4.90579	9.30544e-07	2.43613e-05	ENSMUSG00000066842	chr1	150438275	150869186	protein_coding
Sdf2l1	628.113	-1.28905	0.263017	-4.90101	9.53448e-07	2.48297e-05	ENSMUSG00000022769	chr16	16948002	16950247	protein_coding
Slc34a2	3567.38	-1.15014	0.236223	-4.86886	1.12245e-06	2.8629e-05	ENSMUSG00000029188	chr5	53195423	53229006	protein_coding
Sprr2f	60797.5	-1.54236	0.317253	-4.8616	1.16441e-06	2.95471e-05	ENSMUSG00000050635	chr3	92272494	92273749	protein_coding
Sh2d5	654.678	-1.08223	0.222692	-4.85979	1.17513e-06	2.97809e-05	ENSMUSG00000045349	chr4	137977714	137988643	protein_coding
Ly6e	16752	-1.0197	0.210134	-4.85259	1.21859e-06	3.08036e-05	ENSMUSG00000022587	chr15	74826900	74831752	protein_coding
Speg	116.65	-1.78409	0.367896	-4.84944	1.23812e-06	3.12176e-05	ENSMUSG00000026207	chr1	75351941	75408964	protein_coding
Clca3a2	913.186	-3.01571	0.622605	-4.84369	1.27448e-06	3.19716e-05	ENSMUSG00000028262	chr3	144502320	144525255	protein_coding
Cmc2	129.361	-1.663	0.343873	-4.83609	1.32421e-06	3.29689e-05	ENSMUSG00000014633	chr8	117615424	117648194	protein_coding
4833427F10Rik	214.09	-1.73188	0.35831	-4.83346	1.34179e-06	3.33228e-05	ENSMUSG00000092171	chr17	36083342	36091579	lncRNA
Kif14	137.164	-6.9546	1.44001	-4.82957	1.36829e-06	3.38537e-05	ENSMUSG00000041498	chr1	136394081	136459249	protein_coding
Ccdc69	59.0062	-1.2496	0.259454	-4.81625	1.46278e-06	3.59223e-05	ENSMUSG00000049588	chr11	54940557	54968957	protein_coding
Skida1	42.6096	-2.08175	0.432867	-4.80921	1.51527e-06	3.69822e-05	ENSMUSG00000054074	chr2	18045487	18053862	protein_coding
Asap3	44.8049	-1.55023	0.322862	-4.80151	1.57477e-06	3.8246e-05	ENSMUSG00000036995	chr4	135933676	135972527	protein_coding
Hs3st6	467.527	-1.5014	0.31277	-4.80034	1.58396e-06	3.84222e-05	ENSMUSG00000039628	chr17	24971962	24977658	protein_coding
Ace	163.65	-1.8518	0.386496	-4.79126	1.65739e-06	3.99589e-05	ENSMUSG00000020681	chr11	105858771	105880790	protein_coding
Rdh11	1111.62	-1.11004	0.231871	-4.78731	1.69035e-06	4.06052e-05	ENSMUSG00000066441	chr12	79221111	79239067	protein_coding
Obp2a	482.433	-4.05803	0.848799	-4.78091	1.74502e-06	4.1616e-05	ENSMUSG00000062061	chr2	25590055	25593338	protein_coding
Pola1	300.049	-1.09398	0.229291	-4.77113	1.83198e-06	4.33765e-05	ENSMUSG00000006678	chrX	92348373	92675761	protein_coding
Rcor2	218.187	-1.09221	0.22926	-4.76407	1.89729e-06	4.45504e-05	ENSMUSG00000024968	chr19	7244690	7252590	protein_coding
Gm20667	12.1103	-5.24384	1.10532	-4.74418	2.09351e-06	4.84688e-05	ENSMUSG00000093726	chr14	67910626	67912555	lncRNA
Il18	70.1187	-1.61796	0.341219	-4.7417	2.11929e-06	4.89511e-05	ENSMUSG00000039217	chr9	50466127	50493140	protein_coding
Trex2	282.267	-1.10988	0.234098	-4.74106	2.12601e-06	4.90491e-05	ENSMUSG00000031372	chrX	72477311	72478950	protein_coding
Arhgap45	82.791	-1.27758	0.270622	-4.72089	2.34816e-06	5.3861e-05	ENSMUSG00000035697	chr10	79852487	79867306	protein_coding
Chek1	110.974	-1.6453	0.348555	-4.72035	2.35436e-06	5.39407e-05	ENSMUSG00000032113	chr9	36619778	36638361	protein_coding
Fancg	155.122	-1.18249	0.250531	-4.71994	2.3591e-06	5.39868e-05	ENSMUSG00000028453	chr4	43002343	43010506	protein_coding
Psca	60.088	-1.87212	0.396819	-4.71783	2.38379e-06	5.44889e-05	ENSMUSG00000022598	chr15	74586688	74588918	protein_coding
Rprm	39.9931	-2.05966	0.43661	-4.71739	2.38885e-06	5.45416e-05	ENSMUSG00000075334	chr2	53974105	53975564	protein_coding
Arrb1	700.201	-1.45725	0.308997	-4.71607	2.40442e-06	5.48341e-05	ENSMUSG00000018909	chr7	99184673	99255978	protein_coding
Phyhip	122.06	-1.45846	0.310082	-4.70345	2.55804e-06	5.76737e-05	ENSMUSG00000003469	chr14	70694916	70706272	protein_coding
Sema6b	186.56	-1.36139	0.290157	-4.69192	2.70656e-06	6.06087e-05	ENSMUSG00000001227	chr17	56430085	56447343	protein_coding
Fgd2	59.7203	-1.89054	0.402992	-4.69125	2.71538e-06	6.0669e-05	ENSMUSG00000024013	chr17	29579888	29598635	protein_coding
Aldh1a7	78.3037	-1.55713	0.332839	-4.67833	2.89222e-06	6.433e-05	ENSMUSG00000024747	chr19	20670317	20704926	protein_coding
Chaf1b	375.289	-1.38595	0.296984	-4.66676	3.05993e-06	6.75297e-05	ENSMUSG00000022945	chr16	93680789	93703003	protein_coding
Pbx3	117.72	-1.47712	0.31671	-4.66395	3.10198e-06	6.83817e-05	ENSMUSG00000038718	chr2	34061469	34263154	protein_coding
Lrg1	1655.47	-1.47361	0.316015	-4.66312	3.11457e-06	6.85828e-05	ENSMUSG00000037095	chr17	56426678	56429001	protein_coding
Ubash3b	88.6664	-1.51056	0.324025	-4.66187	3.13351e-06	6.89232e-05	ENSMUSG00000032020	chr9	40922394	41072993	protein_coding
A4galt	2099.88	-2.45213	0.526671	-4.6559	3.22576e-06	7.07169e-05	ENSMUSG00000047878	chr15	83110923	83135975	protein_coding
Etnppl	159.687	-1.3321	0.286242	-4.65377	3.25924e-06	7.10955e-05	ENSMUSG00000019232	chr3	130411097	130431170	protein_coding
Kcnk12	327.505	-3.48583	0.751904	-4.63601	3.55202e-06	7.66817e-05	ENSMUSG00000050138	chr17	88053229	88105422	protein_coding
Efcab11	18.1088	-3.61983	0.781161	-4.63392	3.58813e-06	7.72615e-05	ENSMUSG00000021176	chr12	99659304	99850698	protein_coding
E2f8	209.74	-5.04717	1.08932	-4.63334	3.59819e-06	7.73416e-05	ENSMUSG00000046179	chr7	48516177	48531344	protein_coding
Xkr5	13.1471	-4.60258	0.998675	-4.60869	4.05214e-06	8.57962e-05	ENSMUSG00000039814	chr8	18982745	19000991	protein_coding
Pcsk6	7397.92	-1.2531	0.272081	-4.60562	4.11249e-06	8.66113e-05	ENSMUSG00000030513	chr7	65511482	65700134	protein_coding
Vstm5	423.916	-2.43056	0.528012	-4.60322	4.16003e-06	8.73586e-05	ENSMUSG00000031937	chr9	15150341	15170712	protein_coding
Adgrl1	134.431	-1.42975	0.310743	-4.60108	4.20303e-06	8.79574e-05	ENSMUSG00000013033	chr8	84626734	84668583	protein_coding
C3	410192	-1.27413	0.277318	-4.59448	4.33822e-06	9.00259e-05	ENSMUSG00000024164	chr17	57510970	57535136	protein_coding
Ntn5	27.1283	-3.53773	0.770146	-4.59359	4.35689e-06	9.03188e-05	ENSMUSG00000070564	chr7	45333446	45343980	protein_coding
Rpa2	253.984	-1.00137	0.21802	-4.59304	4.36829e-06	9.04605e-05	ENSMUSG00000028884	chr4	132495643	132506063	protein_coding
Dbi	1050.82	-1.01913	0.221897	-4.5928	4.37342e-06	9.04722e-05	ENSMUSG00000026385	chr1	120041010	120048808	protein_coding
Gal3st1	191.857	-1.23896	0.26993	-4.58991	4.43427e-06	9.14448e-05	ENSMUSG00000049721	chr11	3933636	3949326	protein_coding
Cacna1d	85.0795	-2.22939	0.486024	-4.587	4.49663e-06	9.25381e-05	ENSMUSG00000015968	chr14	29761896	30213412	protein_coding
Aqp8	12862.2	-2.05031	0.448049	-4.57608	4.73765e-06	9.69946e-05	ENSMUSG00000030762	chr7	123061514	123067227	protein_coding
Mir5125	264.841	-1.2183	0.266251	-4.57574	4.74543e-06	9.70536e-05	ENSMUSG00000092981	chr17	24042265	24042343	miRNA
Slc9a5	90.6823	-1.28522	0.280916	-4.57512	4.75957e-06	9.71423e-05	ENSMUSG00000014786	chr8	106075475	106096513	protein_coding
Eif1ad7	16.3562	-4.60245	1.00623	-4.57394	4.78629e-06	9.74868e-05	ENSMUSG00000079029	chr12	88237410	88241270	protein_coding
Kel	41.224	-2.16441	0.474408	-4.56234	5.05854e-06	0.000101674	ENSMUSG00000029866	chr6	41663264	41681273	protein_coding
E230016M11Rik	59.5934	-2.36581	0.518727	-4.56079	5.09611e-06	0.000102325	ENSMUSG00000087231	chr6	67013583	67057638	lncRNA
Hey1	32.8837	-2.7551	0.604683	-4.55627	5.20694e-06	0.000104023	ENSMUSG00000040289	chr3	8728419	8732316	protein_coding
Cyp2s1	742.059	-1.64018	0.360621	-4.54821	5.41034e-06	0.000107545	ENSMUSG00000040703	chr7	25501900	25516338	protein_coding
Coro2a	1812.69	-1.07535	0.23662	-4.54463	5.5032e-06	0.000108845	ENSMUSG00000028337	chr4	46536937	46602202	protein_coding
Gtse1	541.868	-1.40606	0.309843	-4.53797	5.6799e-06	0.000111768	ENSMUSG00000022385	chr15	85743946	85760774	protein_coding
Ihh	81.5596	-2.69299	0.594861	-4.52708	5.98045e-06	0.000117115	ENSMUSG00000006538	chr1	74984474	74990831	protein_coding
Tcf7l1	639.311	-1.07949	0.239005	-4.51662	6.28332e-06	0.000122562	ENSMUSG00000055799	chr6	72603361	72766237	protein_coding
4930461G14Rik	865.938	-1.05516	0.234019	-4.50885	6.51809e-06	0.000126395	ENSMUSG00000097651	chr9	58362385	58376920	lncRNA
Fads2	602.815	-1.46796	0.325664	-4.50759	6.55681e-06	0.000127021	ENSMUSG00000024665	chr19	10040129	10079110	protein_coding
Ptgs1	1447.02	-1.47062	0.327109	-4.49581	6.93057e-06	0.000132449	ENSMUSG00000047250	chr2	36120438	36142284	protein_coding
Ada	290.836	-1.14058	0.253963	-4.49113	7.0845e-06	0.000135001	ENSMUSG00000017697	chr2	163568504	163592159	protein_coding
Ly6g2	30.9017	-2.44392	0.54482	-4.48574	7.26609e-06	0.00013793	ENSMUSG00000047728	chr15	75088225	75094510	protein_coding
Zfp385a	251.657	-1.11757	0.249758	-4.47461	7.65503e-06	0.000144072	ENSMUSG00000000552	chr15	103222322	103248520	protein_coding
Cfb	488.592	-1.41729	0.317559	-4.46307	8.07932e-06	0.000150768	ENSMUSG00000090231	chr17	35075350	35081494	protein_coding
Gm47694	76.005	-1.2572	0.281845	-4.46059	8.17328e-06	0.000152378	ENSMUSG00000114584	chr14	60448423	60453868	TEC
Pcdhgc4	25.8019	-2.87601	0.646066	-4.45158	8.52415e-06	0.000158057	ENSMUSG00000023036	chr18	37948132	37974926	protein_coding
Usp35	181.838	-1.03056	0.231648	-4.44883	8.63406e-06	0.000159902	ENSMUSG00000035713	chr7	96958587	96981227	protein_coding
Nphp4	50.2734	-1.91464	0.431041	-4.4419	8.91692e-06	0.000163679	ENSMUSG00000039577	chr4	152561163	152647640	protein_coding
Aqp4	495.967	-3.68543	0.82991	-4.44075	8.96442e-06	0.000164193	ENSMUSG00000024411	chr18	15522553	15544039	protein_coding
Pcdhgb5	106.009	-1.61519	0.36392	-4.4383	9.06733e-06	0.000165766	ENSMUSG00000103749	chr18	37864062	37974926	protein_coding
Syt16	88.1523	-2.03133	0.457844	-4.43672	9.13379e-06	0.000166526	ENSMUSG00000044912	chr12	74044435	74320041	protein_coding
Gm19696	21.7887	-2.2841	0.51488	-4.43617	9.15731e-06	0.000166648	ENSMUSG00000117485	chr17	84441432	84463868	lncRNA
mt-Nd3	283.102	-1.79215	0.404555	-4.42992	9.42669e-06	0.00017086	ENSMUSG00000064360	chrM	9459	9806	protein_coding
Diaph3	264.01	-1.73392	0.391544	-4.42842	9.49279e-06	0.000171806	ENSMUSG00000022021	chr14	86892803	87378671	protein_coding
Plod1	2053.62	-1.17545	0.265524	-4.42692	9.55891e-06	0.000172688	ENSMUSG00000019055	chr4	147994210	148021224	protein_coding
Slitrk2	12.3147	-3.8056	0.860618	-4.42194	9.78191e-06	0.00017512	ENSMUSG00000036790	chrX	65692924	65704999	protein_coding
Thbs2	423.233	-2.38222	0.538757	-4.4217	9.79287e-06	0.000175158	ENSMUSG00000023885	chr17	14885762	14914497	protein_coding
Nos1ap	302.203	-1.19639	0.270849	-4.4172	9.99867e-06	0.000178036	ENSMUSG00000038473	chr1	170130237	170417430	protein_coding
Col6a3	49.2666	-4.8358	1.09609	-4.41186	1.02487e-05	0.000181671	ENSMUSG00000048126	chr1	90693645	90771693	protein_coding
Gm45114	46.6258	-1.51583	0.344357	-4.40192	1.07298e-05	0.000189353	ENSMUSG00000109136	chr7	19494831	19496179	TEC
Pkd2l1	155.468	-1.4498	0.329455	-4.4006	1.07951e-05	0.000190167	ENSMUSG00000037578	chr19	44136076	44180881	protein_coding
Sprr2a2	39.7047	-2.2952	0.523054	-4.38807	1.14363e-05	0.000199281	ENSMUSG00000068893	chr3	92123227	92164031	protein_coding
Lgals3bp	6933.78	-1.23137	0.281509	-4.37418	1.21889e-05	0.000209851	ENSMUSG00000033880	chr11	118283577	118292918	protein_coding
Icosl	388.462	-1.06567	0.243637	-4.37401	1.21984e-05	0.000209851	ENSMUSG00000000732	chr10	77905136	77919747	protein_coding
Phf19	41.6294	-2.33859	0.535563	-4.36661	1.26191e-05	0.000215854	ENSMUSG00000026873	chr2	34783769	34804038	protein_coding
Hcrtr1	25.6386	-2.69469	0.6183	-4.35823	1.3112e-05	0.000222668	ENSMUSG00000028778	chr4	130024010	130033152	protein_coding
Slc36a2	5.15137	-5.74645	1.32156	-4.34823	1.37244e-05	0.00023148	ENSMUSG00000020264	chr11	55049296	55075903	protein_coding
Wdr76	246.897	-1.08988	0.251273	-4.33744	1.44153e-05	0.000240473	ENSMUSG00000027242	chr2	121337204	121375341	protein_coding
Spock2	84.1801	-1.57575	0.363345	-4.3368	1.44574e-05	0.000240973	ENSMUSG00000058297	chr10	59942041	59971020	protein_coding
Rnf157	91.5822	-1.61017	0.37158	-4.3333	1.4689e-05	0.000244217	ENSMUSG00000052949	chr11	116227179	116303858	protein_coding
Pfkfb4	143.988	-1.08379	0.250528	-4.32603	1.51823e-05	0.000250111	ENSMUSG00000025648	chr9	108820846	108861296	protein_coding
Erfe	110.32	-1.26792	0.293286	-4.32315	1.53816e-05	0.000253184	ENSMUSG00000047443	chr1	91294152	91301939	protein_coding
Tiam1	372.954	-1.34699	0.311628	-4.32243	1.5432e-05	0.000253592	ENSMUSG00000002489	chr16	89583999	89940657	protein_coding
Mtfr2	39.0974	-2.46457	0.571591	-4.31178	1.61948e-05	0.000264591	ENSMUSG00000019992	chr10	20223516	20237050	protein_coding
Trip13	124.888	-1.19954	0.279148	-4.29713	1.73027e-05	0.000279167	ENSMUSG00000021569	chr13	74059466	74085903	protein_coding
Gstt1	78.9582	-1.78345	0.416569	-4.28128	1.85819e-05	0.000295077	ENSMUSG00000001663	chr10	75619647	75634418	protein_coding
Krt84	34.5191	-2.71694	0.635165	-4.27753	1.88981e-05	0.000298425	ENSMUSG00000044294	chr15	101433461	101441255	protein_coding
Eif1ad10	21.2437	-2.74155	0.64158	-4.27313	1.92748e-05	0.000303406	ENSMUSG00000095799	chr12	88215508	88219640	protein_coding
mt-Tg	30.2247	-2.91502	0.682813	-4.26913	1.9624e-05	0.00030768	ENSMUSG00000064359	chrM	9391	9458	Mt_tRNA
Wdr62	54.2648	-2.16594	0.507664	-4.26649	1.98574e-05	0.000310602	ENSMUSG00000037020	chr7	29939563	29979844	protein_coding
Cdc7	65.1145	-1.95182	0.457601	-4.26533	1.99605e-05	0.000311724	ENSMUSG00000029283	chr5	107112188	107132298	protein_coding
Efcab12	23.9161	-1.78854	0.421054	-4.24777	2.15908e-05	0.000331438	ENSMUSG00000030321	chr6	115787690	115815373	protein_coding
Acap1	42.0267	-1.75729	0.414891	-4.23553	2.28013e-05	0.000346	ENSMUSG00000001588	chr11	69772393	69786365	protein_coding
Adamts13	6.56569	-4.89688	1.15667	-4.2336	2.29979e-05	0.000347966	ENSMUSG00000014852	chr2	26863428	26899640	protein_coding
Slc22a17	322.895	-1.31006	0.309622	-4.23115	2.32499e-05	0.000350926	ENSMUSG00000022199	chr14	55143761	55150589	protein_coding
Gstm6	13.3991	-4.09826	0.969328	-4.22794	2.35844e-05	0.000354355	ENSMUSG00000068762	chr3	107846163	107851065	protein_coding
Naaa	1765.89	-1.09551	0.259343	-4.22415	2.39839e-05	0.000358415	ENSMUSG00000029413	chr5	92405518	92426029	protein_coding
Pcsk9	57.1103	-1.44823	0.343799	-4.21242	2.5265e-05	0.000374776	ENSMUSG00000044254	chr4	106299526	106321526	protein_coding
Gm17334	13.2232	-3.11306	0.739217	-4.21129	2.53916e-05	0.000376092	ENSMUSG00000091191	chr11	53660878	53664021	TEC
Plekhd1	42.1128	-2.65585	0.631309	-4.20689	2.58906e-05	0.000382911	ENSMUSG00000066438	chr12	80739365	80770988	protein_coding
Slc39a4	9481.86	-1.06452	0.253176	-4.20467	2.61462e-05	0.000386115	ENSMUSG00000063354	chr15	76496583	76501584	protein_coding
Amigo3	99.3765	-1.01677	0.242169	-4.19861	2.68553e-05	0.000394528	ENSMUSG00000032593	chr9	107930358	107932900	protein_coding
Tnfrsf18	58.0439	-1.74645	0.416347	-4.19469	2.73241e-05	0.00039975	ENSMUSG00000041954	chr4	156110621	156113352	protein_coding
Napepld	691.246	-1.2893	0.307419	-4.19396	2.74127e-05	0.000400342	ENSMUSG00000044968	chr5	21867899	21906394	protein_coding
Uroc1	32.3953	-3.68476	0.879187	-4.1911	2.77608e-05	0.000404829	ENSMUSG00000034456	chr6	90310266	90341533	protein_coding
Rad51c	41.4301	-1.52273	0.363409	-4.19012	2.78806e-05	0.000405681	ENSMUSG00000007646	chr11	87267471	87295780	protein_coding
Akr1c19	363.986	-1.50281	0.358698	-4.18962	2.79422e-05	0.00040628	ENSMUSG00000071551	chr13	4278699	4302842	protein_coding
Gm37087	53.5061	-2.17745	0.520518	-4.18324	2.87381e-05	0.000416934	ENSMUSG00000103187	chr3	92150240	92153548	TEC
Tstd3	59.12	-1.38049	0.330131	-4.18163	2.89425e-05	0.000419593	ENSMUSG00000028251	chr4	21757382	21767212	protein_coding
Fam171a2	2026.38	-1.18366	0.28309	-4.18122	2.89955e-05	0.000420054	ENSMUSG00000034685	chr11	102327807	102338508	protein_coding
Oxtr	200.548	-1.82937	0.437877	-4.17782	2.94316e-05	0.000424509	ENSMUSG00000049112	chr6	112450644	112466904	protein_coding
Vsnl1	67.692	-2.37351	0.568657	-4.17388	2.99453e-05	0.00043129	ENSMUSG00000054459	chr12	11375243	11486614	protein_coding
Gm17276	111.023	-1.31224	0.314606	-4.17106	3.03187e-05	0.000435403	ENSMUSG00000097305	chr17	32332385	32360817	lncRNA
1700016C15Rik	119.416	-1.03991	0.25087	-4.14521	3.39505e-05	0.000478202	ENSMUSG00000015962	chr1	177557380	177580890	protein_coding
Cdkn3	29.975	-3.06267	0.739708	-4.14038	3.46738e-05	0.000485972	ENSMUSG00000037628	chr14	46997998	47009126	protein_coding
Tpi-rs11	46.4329	-1.24523	0.300926	-4.138	3.50345e-05	0.000490334	ENSMUSG00000106755	chr6	127160372	127160681	processed_pseudogene
Gas7	807.621	-1.17536	0.284137	-4.13661	3.52476e-05	0.000492968	ENSMUSG00000033066	chr11	67345917	67575800	protein_coding
Robo1	397.731	-1.1607	0.280681	-4.1353	3.54498e-05	0.000494749	ENSMUSG00000022883	chr16	72105194	72842983	protein_coding
Ldha-ps2	36.1462	-1.81156	0.438113	-4.1349	3.55104e-05	0.000495246	ENSMUSG00000083836	chr4	119191586	119192642	processed_pseudogene
Atad5	127.388	-1.07934	0.261227	-4.13182	3.59907e-05	0.000500887	ENSMUSG00000017550	chr11	79980226	80026620	protein_coding
Atf7ip2	4.16894	-5.4447	1.31965	-4.12588	3.69324e-05	0.000511773	ENSMUSG00000039200	chr16	10010576	10069342	protein_coding
Ddx11	366.361	-1.03175	0.250114	-4.12512	3.70543e-05	0.00051245	ENSMUSG00000035842	chr17	66430515	66459169	protein_coding
Gm47283	2132.12	-1.38136	0.335232	-4.12059	3.77901e-05	0.000521535	ENSMUSG00000096768	chrY	90796007	90827734	lncRNA
Marchf10	4.39755	-5.52324	1.3405	-4.12029	3.78397e-05	0.000521856	ENSMUSG00000078627	chr11	105251624	105347561	protein_coding
Adamtsl4	1042.22	-1.33696	0.324546	-4.11948	3.79721e-05	0.000523318	ENSMUSG00000015850	chr3	95583511	95595228	protein_coding
Gm33195	11.8237	-2.62191	0.637238	-4.11449	3.88045e-05	0.000532198	ENSMUSG00000113780	chr13	44018145	44022065	lncRNA
Prdm9	145.73	-1.16192	0.283384	-4.10015	4.12877e-05	0.000561977	ENSMUSG00000051977	chr17	15763341	15784616	protein_coding
Melk	646.213	-1.31732	0.321581	-4.09639	4.19649e-05	0.000569631	ENSMUSG00000035683	chr4	44300876	44364675	protein_coding
Gm16008	52.172	-1.50927	0.368543	-4.09524	4.21735e-05	0.000571288	ENSMUSG00000087381	chr4	156106465	156116120	lncRNA
Smim31	99.1876	-1.84659	0.451012	-4.09431	4.2342e-05	0.000573046	ENSMUSG00000074300	chr8	65538265	65582215	protein_coding
Sfxn5	82.9243	-1.16145	0.283843	-4.09186	4.2793e-05	0.000577312	ENSMUSG00000033720	chr6	85190031	85310404	protein_coding
A730020M07Rik	169.143	-1.28678	0.314495	-4.09158	4.2844e-05	0.000577606	ENSMUSG00000044522	chr3	121428585	121437134	lncRNA
Trpc6	5.53578	-5.85396	1.43107	-4.09061	4.30235e-05	0.000579632	ENSMUSG00000031997	chr9	8544143	8680742	protein_coding
Pgam1-ps2	68.6459	-1.49387	0.366434	-4.07679	4.56621e-05	0.000607217	ENSMUSG00000082016	chr7	27169196	27169960	processed_pseudogene
Gm52981	124.822	-1.29436	0.318625	-4.06231	4.85893e-05	0.000636867	ENSMUSG00000118086	chr19	21098516	21225815	lncRNA
Gm4610	237.863	-1.41775	0.349203	-4.05995	4.90826e-05	0.000642908	ENSMUSG00000104554	chr3	122170746	122185655	lncRNA
Gm35333	14.6679	-2.43465	0.599722	-4.05964	4.91487e-05	0.000643348	ENSMUSG00000114274	chr13	60570570	60582545	lncRNA
mt-Tl2	149.029	-1.71081	0.423642	-4.03833	5.38328e-05	0.000698102	ENSMUSG00000064366	chrM	11671	11741	Mt_tRNA
Prr9	6.31585	-4.83461	1.19732	-4.03785	5.39438e-05	0.00069873	ENSMUSG00000056270	chr3	92029511	92031254	protein_coding
Gm37752	125.896	-1.44729	0.358688	-4.03496	5.46124e-05	0.000706468	ENSMUSG00000103385	chr3	92185032	92188340	TEC
Kndc1	34.9095	-1.82526	0.453143	-4.02799	5.62548e-05	0.000724553	ENSMUSG00000066129	chr7	139474612	139521450	protein_coding
Bco2	42.0372	-2.18114	0.541741	-4.02617	5.66932e-05	0.000729576	ENSMUSG00000032066	chr9	50444387	50466481	protein_coding
Gm13398	177.632	-2.67648	0.665032	-4.02459	5.7075e-05	0.000733395	ENSMUSG00000087364	chr2	26927297	26930865	protein_coding
Gm43608	14.4143	-3.2545	0.809108	-4.02233	5.76251e-05	0.000739167	ENSMUSG00000106036	chr3	121495150	121503895	lncRNA
Cenpk	31.1349	-2.04807	0.51014	-4.01473	5.95144e-05	0.000760939	ENSMUSG00000021714	chr13	104365119	104388900	protein_coding
Cuzd1	91.8879	-5.15364	1.28392	-4.01399	5.97e-05	0.000762329	ENSMUSG00000040205	chr7	130910283	130924021	protein_coding
Steap1	1330.36	-1.26036	0.314627	-4.00589	6.17841e-05	0.000785399	ENSMUSG00000015652	chr5	5786317	5799326	protein_coding
Sprr2e	22.2568	-2.42866	0.606379	-4.00518	6.19701e-05	0.000786962	ENSMUSG00000055030	chr3	92259450	92260756	protein_coding
F420014N23Rik	37.3793	-1.53395	0.383285	-4.00212	6.27764e-05	0.000794446	ENSMUSG00000097331	chr10	127031118	127038512	lncRNA
Gm45776	21.7646	-2.94316	0.736336	-3.99703	6.41412e-05	0.000807592	ENSMUSG00000110520	chr8	118439309	118440830	TEC
Tmem266	439.717	-1.32947	0.332601	-3.9972	6.40949e-05	0.000807592	ENSMUSG00000032313	chr9	55234197	55345629	protein_coding
Rinl	190.504	-1.25728	0.316717	-3.96972	7.19562e-05	0.000890154	ENSMUSG00000051735	chr7	28488394	28498388	protein_coding
Gm49911	28.1271	-1.86522	0.47032	-3.96585	7.31348e-05	0.000899681	ENSMUSG00000117219	chr17	24032188	24032474	processed_pseudogene
Abi3bp	18.7697	-3.82868	0.966019	-3.96336	7.39013e-05	0.000908546	ENSMUSG00000035258	chr16	56298241	56510498	protein_coding
Nckap1l	10.3491	-5.5727	1.40641	-3.96236	7.4212e-05	0.000911235	ENSMUSG00000022488	chr15	103362221	103407237	protein_coding
Slc25a42	343.454	-1.05206	0.265664	-3.9601	7.4918e-05	0.000918766	ENSMUSG00000002346	chr8	70636990	70664955	protein_coding
Gng12	37870.1	-1.25951	0.31864	-3.95275	7.7258e-05	0.000938749	ENSMUSG00000036402	chr6	66873381	66998334	protein_coding
Lockd	4.65975	-5.60661	1.42059	-3.94667	7.92466e-05	0.000958878	ENSMUSG00000098318	chr6	134906055	134933761	lncRNA
Grin1	108.77	-2.03994	0.516866	-3.94674	7.92215e-05	0.000958878	ENSMUSG00000026959	chr2	25181193	25209199	protein_coding
Gm13814	6.55733	-4.30438	1.09118	-3.94471	7.98959e-05	0.000965473	ENSMUSG00000085261	chr2	92314164	92360164	lncRNA
Gm2999	52.9668	-1.47779	0.37471	-3.94382	8.01928e-05	0.000968471	ENSMUSG00000115868	chr15	71666419	71666956	processed_pseudogene
St6galnac2	49.1679	-1.72904	0.438623	-3.94197	8.08166e-05	0.000974224	ENSMUSG00000110170	chr11	116568309	116572116	protein_coding
Aunip	19.6702	-2.62181	0.666048	-3.93637	8.27234e-05	0.000993583	ENSMUSG00000078521	chr4	134238310	134251238	protein_coding
Meltf	70.0731	-1.457	0.370182	-3.9359	8.28852e-05	0.000994924	ENSMUSG00000022780	chr16	31697628	31717838	protein_coding
Pik3cg	146.139	-1.28255	0.325881	-3.93564	8.29757e-05	0.000995407	ENSMUSG00000020573	chr12	32223472	32258658	protein_coding
Pcsk4	187.807	-1.11444	0.283791	-3.92697	8.6021e-05	0.00102511	ENSMUSG00000020131	chr10	80157117	80165332	protein_coding
Pbx4	27.3361	-1.59109	0.405906	-3.91985	8.86045e-05	0.00104896	ENSMUSG00000031860	chr8	70285141	70324942	protein_coding
Gins2	118.11	-1.20929	0.30862	-3.91837	8.91512e-05	0.0010542	ENSMUSG00000031821	chr8	121305372	121316043	protein_coding
Fabp2	35.3006	-1.9586	0.500009	-3.91713	8.96092e-05	0.0010577	ENSMUSG00000023057	chr3	122688721	122693155	protein_coding
Fancb	62.3904	-1.1504	0.293803	-3.91553	9.02072e-05	0.00106412	ENSMUSG00000047757	chrX	163763588	163780268	protein_coding
Ptges3l	43.4925	-1.26675	0.323742	-3.91283	9.1222e-05	0.00107213	ENSMUSG00000097487	chr11	101309638	101316159	protein_coding
Gm7932	66.9571	-2.12413	0.543261	-3.90996	9.23121e-05	0.00107932	ENSMUSG00000108084	chr6	48837263	48843049	lncRNA
Bmyc	613.628	-1.20103	0.30734	-3.90783	9.31287e-05	0.00108651	ENSMUSG00000049086	chr2	25596751	25597733	protein_coding
Proc	63.6536	-1.58747	0.406453	-3.90567	9.39647e-05	0.00109412	ENSMUSG00000024386	chr18	32256179	32272623	protein_coding
Gm14023	57.5624	-1.50045	0.384549	-3.90183	9.54689e-05	0.00110828	ENSMUSG00000085498	chr2	129139285	129149746	lncRNA
Aqp2	9.96739	-3.88561	0.996859	-3.89785	9.70492e-05	0.00112018	ENSMUSG00000023013	chr15	99476936	99482428	protein_coding
Lifr	1556.78	-1.07701	0.276494	-3.89525	9.80959e-05	0.00113093	ENSMUSG00000054263	chr15	7120095	7226970	protein_coding
Galnt6	16.1692	-2.84079	0.729687	-3.89316	9.89471e-05	0.00113875	ENSMUSG00000037280	chr15	100589694	100627257	protein_coding
Krt83	25.9164	-3.0081	0.774132	-3.88577	0.000102005	0.00116919	ENSMUSG00000067613	chr15	101383011	101389393	protein_coding
Fam83d	93.4166	-3.22399	0.832367	-3.87328	0.00010738	0.00121901	ENSMUSG00000027654	chr2	158610013	158628557	protein_coding
Chst1	14.319	-3.04988	0.787625	-3.87225	0.000107837	0.00122331	ENSMUSG00000027221	chr2	92430052	92445595	protein_coding
Ror2	497.915	-1.2892	0.333709	-3.86323	0.000111897	0.00125784	ENSMUSG00000021464	chr13	53263348	53440160	protein_coding
Bpi	3.63409	-5.24564	1.35789	-3.86307	0.000111969	0.00125794	ENSMUSG00000052922	chr2	158100014	158126451	protein_coding
Col2a1	14.4477	-3.37405	0.876474	-3.84958	0.000118323	0.00132034	ENSMUSG00000022483	chr15	97873483	97902576	protein_coding
Celf5	39.3859	-1.3846	0.360626	-3.83944	0.000123317	0.00137143	ENSMUSG00000034818	chr10	81295061	81318543	protein_coding
Gm49759	430.316	-1.19172	0.311737	-3.82284	0.000131921	0.00145245	ENSMUSG00000111394	chr9	59580097	59583983	TEC
Mad2l1	874.454	-1.34207	0.35119	-3.82149	0.000132649	0.00145884	ENSMUSG00000029910	chr6	66512374	66524204	protein_coding
Gm39041	33.1549	-2.22837	0.58345	-3.8193	0.000133831	0.00146777	ENSMUSG00000108460	chr7	78948773	78952674	TEC
Car9	159.978	-1.07139	0.280571	-3.81859	0.000134217	0.00147038	ENSMUSG00000028463	chr4	43506966	43513729	protein_coding
Utf1	169.401	-1.92059	0.503699	-3.81298	0.000137302	0.0014959	ENSMUSG00000047751	chr7	139523702	139525025	protein_coding
Dnase2b	44.7448	-2.31961	0.608493	-3.81206	0.000137813	0.00149982	ENSMUSG00000028185	chr3	146286740	146321351	protein_coding
Tmem108	5.48988	-5.84104	1.53452	-3.80644	0.000140984	0.00152929	ENSMUSG00000042757	chr9	103360146	103639036	protein_coding
Tektip1	4.86203	-5.06037	1.33272	-3.79702	0.000146448	0.00157734	ENSMUSG00000020234	chr10	81198901	81201650	protein_coding
Pnp2	25.8176	-2.05196	0.540523	-3.79626	0.000146897	0.00158131	ENSMUSG00000068417	chr14	51193449	51202206	protein_coding
Sgk2	40.5415	-1.56907	0.413776	-3.79208	0.00014939	0.00159773	ENSMUSG00000017868	chr2	162829250	162856047	protein_coding
Cdkn2d	97.6581	-1.62184	0.428463	-3.78524	0.000153557	0.00163613	ENSMUSG00000096472	chr9	21199706	21202703	protein_coding
Hydin	5.9106	-5.94809	1.5745	-3.77775	0.000158252	0.00168072	ENSMUSG00000059854	chr8	110993609	111336885	protein_coding
Adgrf3	10.424	-3.19602	0.846879	-3.77388	0.000160726	0.00170244	ENSMUSG00000067642	chr5	30398429	30410720	protein_coding
Aldoc	628.658	-1.14783	0.304325	-3.77173	0.000162118	0.00171169	ENSMUSG00000017390	chr11	78213794	78218607	protein_coding
4930500H12Rik	4.29955	-5.49247	1.45847	-3.76592	0.000165938	0.00173998	ENSMUSG00000116976	chr16	72869226	73220555	lncRNA
Pde4a	166.816	-1.40391	0.37294	-3.76442	0.000166933	0.00174764	ENSMUSG00000032177	chr9	21077010	21124544	protein_coding
Krt15	159.676	-1.82453	0.484807	-3.76341	0.000167609	0.00175194	ENSMUSG00000054146	chr11	100022584	100026754	protein_coding
Nqo1	80.4809	-2.15273	0.572976	-3.7571	0.000171895	0.00179255	ENSMUSG00000003849	chr8	108114857	108129838	protein_coding
Ak4	955.918	-1.18047	0.314208	-3.75697	0.000171984	0.00179255	ENSMUSG00000028527	chr4	101276474	101324192	protein_coding
Gm5452	41.7589	-1.46751	0.39135	-3.74986	0.00017693	0.00183677	ENSMUSG00000114687	chr13	83980459	83981455	processed_pseudogene
Gm40915	48.1891	-1.33844	0.357076	-3.74834	0.000178009	0.00184411	ENSMUSG00000114404	chr13	37800940	37811579	lncRNA
Scd4	26.3354	-1.82864	0.487975	-3.7474	0.000178679	0.00184911	ENSMUSG00000050195	chr19	44321531	44335182	protein_coding
Peli2	347.237	-1.51432	0.404135	-3.74706	0.000178922	0.00185066	ENSMUSG00000021846	chr14	48358280	48519032	protein_coding
Tprg	48.0567	-2.42222	0.64797	-3.73816	0.000185368	0.00190245	ENSMUSG00000048399	chr16	25105567	25241094	protein_coding
Rpe65	22.1956	-2.41624	0.647695	-3.73052	0.000191083	0.00195502	ENSMUSG00000028174	chr3	159304812	159330958	protein_coding
Gm20442	220.009	-1.1362	0.304629	-3.72977	0.000191654	0.00195985	ENSMUSG00000092600	chr17	36054215	36075083	lncRNA
Cep128	117.691	-1.05228	0.283182	-3.71592	0.000202466	0.00204823	ENSMUSG00000061533	chr12	90965266	91351183	protein_coding
ENSMUSG00000120514	48.1873	-1.57173	0.423254	-3.71346	0.000204447	0.00206616	ENSMUSG00000120514	chr19	61140004	61140729	lncRNA
Pcyox1l	463.168	-1.00752	0.271863	-3.706	0.000210559	0.00212359	ENSMUSG00000024579	chr18	61829908	61840706	protein_coding
Aifm3	78.6251	-1.12963	0.305484	-3.69784	0.000217442	0.00218301	ENSMUSG00000022763	chr16	17307475	17325349	protein_coding
Gm35019	516.474	-1.26004	0.341194	-3.69302	0.000221611	0.00221924	ENSMUSG00000115326	chr15	37893239	37899960	lncRNA
Rps23rg1	13.5906	-3.21161	0.870539	-3.68922	0.00022494	0.0022469	ENSMUSG00000065952	chr8	3617990	3634939	protein_coding
Tmem54	339.661	-2.28734	0.620672	-3.68526	0.000228468	0.00227412	ENSMUSG00000028786	chr4	128999341	129005419	protein_coding
Oaf	174.096	-1.0981	0.298085	-3.68384	0.000229742	0.00228336	ENSMUSG00000032014	chr9	43132532	43151208	protein_coding
Crocc	856.166	-1.88398	0.512497	-3.67608	0.00023685	0.00234109	ENSMUSG00000040860	chr4	140743948	140787861	protein_coding
Arhgef25	397.974	-1.0336	0.282131	-3.66355	0.000248744	0.00244646	ENSMUSG00000019467	chr10	127018394	127025952	protein_coding
Foxa2	216.588	-1.01489	0.277252	-3.66052	0.000251706	0.00246702	ENSMUSG00000037025	chr2	147884797	147888889	protein_coding
Atp2b2	1760.39	-1.90082	0.519712	-3.65746	0.00025473	0.0024905	ENSMUSG00000030302	chr6	113720792	114019574	protein_coding
Ung	224.229	-1.03884	0.284704	-3.64883	0.000263435	0.0025617	ENSMUSG00000029591	chr5	114268447	114277384	protein_coding
Inpp4b	88.809	-1.62683	0.44593	-3.64818	0.000264105	0.00256445	ENSMUSG00000037940	chr8	82069185	82854543	protein_coding
Gm32014	74.6067	-1.14455	0.313758	-3.64789	0.000264404	0.00256609	ENSMUSG00000111602	chr9	8644074	8740989	lncRNA
Gm13420	29.7646	-1.36264	0.374103	-3.64242	0.00027009	0.00259711	ENSMUSG00000079497	chr2	29634931	29641697	protein_coding
Cpt1c	32.1085	-1.65121	0.454026	-3.63681	0.000276035	0.00264274	ENSMUSG00000007783	chr7	44608796	44624275	protein_coding
Mlph	1801.56	-1.8886	0.519409	-3.63604	0.000276857	0.00264804	ENSMUSG00000026303	chr1	90842807	90878864	protein_coding
Slc16a6	4728.59	-1.03212	0.283943	-3.63496	0.00027802	0.0026566	ENSMUSG00000041920	chr11	109341681	109364424	protein_coding
Ggn	23.8222	-1.93639	0.53317	-3.63185	0.000281395	0.00267981	ENSMUSG00000031493	chr7	28869635	28873401	protein_coding
Gm3336	255.272	-1.34507	0.37051	-3.63033	0.00028306	0.00269049	ENSMUSG00000095026	chr8	71171192	71175283	protein_coding
Tmem86b	79.0729	-1.12458	0.310845	-3.61782	0.000297091	0.00279589	ENSMUSG00000045282	chr7	4631039	4634421	protein_coding
Treh	34.1161	-5.34847	1.48043	-3.61278	0.000302937	0.00284127	ENSMUSG00000032098	chr9	44584530	44597602	protein_coding
Gm49405	59.843	-1.21719	0.337759	-3.60372	0.000313698	0.0029242	ENSMUSG00000024869	chr19	4050626	4055816	protein_coding
Tnfrsf11a	102.418	-1.37787	0.383554	-3.59237	0.000327684	0.0030233	ENSMUSG00000026321	chr1	105708443	105775709	protein_coding
Gm43429	174.838	-1.08816	0.303584	-3.58437	0.000337899	0.00309306	ENSMUSG00000106290	chr3	135566109	135568359	TEC
Ppbp	1564.52	-1.0784	0.301331	-3.57879	0.000345183	0.00314701	ENSMUSG00000029372	chr5	90916377	90917922	protein_coding
Slc29a1	131.009	-1.02813	0.287613	-3.57468	0.00035065	0.0031804	ENSMUSG00000023942	chr17	45896126	45910532	protein_coding
Gatm	35.5404	-1.55707	0.435978	-3.57143	0.000355032	0.00321427	ENSMUSG00000027199	chr2	122424948	122441784	protein_coding
5930430L01Rik	59.5147	-1.14287	0.320089	-3.57047	0.000356342	0.00322318	ENSMUSG00000106951	chr5	148926866	148932033	lncRNA
Ndnf	35.3053	-1.72319	0.483686	-3.56263	0.000367159	0.00329694	ENSMUSG00000049001	chr6	65648574	65689310	protein_coding
Zfp934	81.8721	-1.09291	0.30682	-3.56205	0.000367965	0.00330269	ENSMUSG00000074865	chr13	62627641	62719013	protein_coding
Fcmr	45.9736	-1.14673	0.322842	-3.55199	0.000382328	0.00341613	ENSMUSG00000042474	chr1	130793406	130808528	protein_coding
Gjb5	23.9382	-1.34223	0.379044	-3.5411	0.000398468	0.00353484	ENSMUSG00000042357	chr4	127248602	127251974	protein_coding
Adam33	963.915	-1.09644	0.30985	-3.5386	0.000402248	0.003562	ENSMUSG00000027318	chr2	130892511	130905734	protein_coding
Gm9951	28.7812	-1.82622	0.516197	-3.53784	0.000403415	0.00356914	ENSMUSG00000054618	chr8	34516416	34524200	lncRNA
Plcxd3	104.352	-1.91763	0.542486	-3.5349	0.000407926	0.00360422	ENSMUSG00000049148	chr15	4404973	4605035	protein_coding
Selenbp2	37.0787	-1.24971	0.353711	-3.53315	0.00041064	0.00362175	ENSMUSG00000068877	chr3	94600863	94611720	protein_coding
Cys1	790.648	-1.70421	0.482561	-3.53159	0.000413063	0.00363988	ENSMUSG00000062563	chr12	24715832	24731812	protein_coding
C78859	7.27197	-3.68831	1.04483	-3.53004	0.00041549	0.00365476	ENSMUSG00000110710	chr8	95048786	95054728	lncRNA
Sec1	66.3861	-1.50617	0.426747	-3.52943	0.00041646	0.00366167	ENSMUSG00000040364	chr7	45327110	45343826	protein_coding
Slc25a35	133.436	-1.3801	0.392042	-3.52028	0.000431095	0.00376861	ENSMUSG00000018740	chr11	68858957	68865191	protein_coding
Dnah17	69.9108	-1.16422	0.330868	-3.51869	0.000433686	0.00378625	ENSMUSG00000033987	chr11	117912549	118021460	protein_coding
Pla2g2d	54.2594	-1.80539	0.513585	-3.51526	0.000439324	0.003822	ENSMUSG00000041202	chr4	138503046	138509357	protein_coding
Gm5846	12.6941	-2.35715	0.673433	-3.5002	0.000464906	0.00401198	ENSMUSG00000104309	chr3	49335782	49337195	processed_pseudogene
Lypd3	84.6358	-1.09358	0.31252	-3.49924	0.000466582	0.00402031	ENSMUSG00000057454	chr7	24335975	24340543	protein_coding
Gm15612	6.41267	-3.80882	1.08869	-3.49855	0.000467798	0.00402729	ENSMUSG00000085828	chr6	88819836	88824256	lncRNA
B4galnt4	78.7002	-1.11558	0.31978	-3.48858	0.000485601	0.00415349	ENSMUSG00000055629	chr7	140641017	140652313	protein_coding
Entpd7	267.249	-1.01109	0.289947	-3.48715	0.000488202	0.00416854	ENSMUSG00000025192	chr19	43678111	43722136	protein_coding
Gm13375	97.0889	-1.19868	0.345096	-3.47346	0.000513788	0.00434767	ENSMUSG00000075514	chr2	20973833	20975168	lncRNA
Hsd17b2	96.9301	-2.84743	0.819836	-3.47317	0.000514351	0.00434872	ENSMUSG00000031844	chr8	118428643	118485766	protein_coding
Lrr1	9.91766	-3.2811	0.947422	-3.46319	0.000533806	0.00448832	ENSMUSG00000034883	chr12	69215588	69225783	protein_coding
Egln3	2094.57	-1.68686	0.487829	-3.45789	0.000544432	0.00455064	ENSMUSG00000035105	chr12	54225767	54250646	protein_coding
Gm50039	60.784	-4.27346	1.23754	-3.45318	0.00055401	0.004619	ENSMUSG00000117466	chr17	88132501	88146425	lncRNA
2010110K18Rik	3.35326	-5.13316	1.48704	-3.45194	0.00055658	0.00463653	ENSMUSG00000097755	chr18	34884796	34891747	lncRNA
Ecm1	5410.45	-1.47606	0.428962	-3.44101	0.000579556	0.00479567	ENSMUSG00000028108	chr3	95641459	95646881	protein_coding
Atp7b	62.6066	-2.03335	0.591776	-3.43601	0.000590342	0.00487475	ENSMUSG00000006567	chr8	22482801	22550321	protein_coding
Lgals12	99.875	-1.34742	0.39256	-3.43239	0.000598297	0.00491994	ENSMUSG00000024972	chr19	7574025	7584558	protein_coding

## Sheet: UP_ALDH_HIvLO_GO
Term	Overlap	P-value	Adjusted P-value	Old P-value	Old Adjusted P-value	Odds Ratio	Combined Score	Genes
Insulin Pathway	6/43	0.00018016	0.0221596	0	0	8.22196	70.887	CAV1;EIF4EBP1;GRB10;SGK1;RHOQ;NCK1
BMP receptor signaling	5/42	0.00132114	0.0812499	0	0	6.83393	45.3039	PPP1R15A;BMP4;BAMBI;FST;BMP6
Syndecan-1-mediated signaling events	5/46	0.00199711	0.0818815	0	0	6.16594	38.3278	COL1A2;COL4A1;COL4A4;COL5A2;COL4A3
Signaling events mediated by PTP1B	5/52	0.00344136	0.105822	0	0	5.37715	30.4986	CDH2;CAV1;LEPR;NOX4;FYN
Signaling events regulated by Ret tyrosine kinase	4/38	0.0063398	0.129966	0	0	5.93511	30.0371	JUN;GRB10;IRS2;NCK1
Signaling mediated by p38-alpha and p38-beta	4/38	0.0063398	0.129966	0	0	5.93511	30.0371	JUN;DDIT3;EIF4EBP1;HSPB1
Beta1 integrin cell surface interactions	5/66	0.00947907	0.150985	0	0	4.14009	19.2873	COL1A2;COL4A1;COL4A4;COL4A3;COL5A2
Beta3 integrin cell surface interactions	4/43	0.00982019	0.150985	0	0	5.17288	23.9158	COL1A2;COL4A1;COL4A4;COL4A3
Integrins in angiogenesis	5/72	0.0135012	0.184517	0	0	3.76817	16.2219	COL1A2;COL4A1;COL4A4;COL4A3;COL5A2
Netrin-mediated signaling events	3/30	0.0205063	0.230686	0	0	5.59297	21.74	ELMO1;FYN;NCK1
Nephrin/Neph1 signaling in the kidney podocyte	3/31	0.0223811	0.230686	0	0	5.39295	20.4907	JUN;FYN;NCK1
Glucocorticoid receptor regulatory network	5/82	0.022506	0.230686	0	0	3.27712	12.4333	VIPR1;JUN;KRT17;SGK1;PCK2
Signaling events mediated by focal adhesion kinase	4/58	0.0268945	0.236287	0	0	3.7331	13.4983	JUN;ELMO1;FYN;NCK1
ATF-2 transcription factor network	4/58	0.0268945	0.236287	0	0	3.7331	13.4983	JUN;DDIT3;JDP2;ATF3
Validated transcriptional targets of AP1 family members Fra1 and Fra2	3/35	0.0307812	0.252406	0	0	4.71787	16.4222	JUN;COL1A2;ATF4
Signaling events mediated by VEGFR1 and VEGFR2	4/68	0.0444276	0.341537	0	0	3.1482	9.80315	CAV1;GRB10;FYN;NCK1
Integrin-linked kinase signaling	3/45	0.057929	0.419134	0	0	3.59273	10.234	PPP1R14A;JUN;LIMS2
PDGFR-alpha signaling pathway	2/22	0.0684139	0.450486	0	0	5.02256	13.4714	JUN;CAV1
Regulation of nuclear beta catenin signaling and target gene transcription	4/79	0.0695873	0.450486	0	0	2.68495	7.15585	AR;JUN;CCND2;MDFIC
Regulation of nuclear SMAD2/3 signaling	4/81	0.074807	0.460063	0	0	2.61494	6.78013	AR;JUN;COL1A2;ATF3
S1P2 pathway	2/24	0.0797007	0.466818	0	0	4.5655	11.5483	GNA14;JUN
TGF-beta receptor signaling	3/54	0.0892722	0.466991	0	0	2.95736	7.14517	PPP1R15A;BAMBI;CAV1
IL2-mediated signaling events	3/55	0.0931175	0.466991	0	0	2.90034	6.88509	JUN;IRS2;FYN
VEGFR1 specific signals	2/27	0.0976032	0.466991	0	0	4.01703	9.34699	CAV1;NCK1
Glypican 1 network	2/27	0.0976032	0.466991	0	0	4.01703	9.34699	FYN;SLIT2
p53 pathway	3/57	0.101008	0.466991	0	0	2.79263	6.40225	RPL5;RASSF1;KAT8
IGF1 pathway	2/28	0.103801	0.466991	0	0	3.86233	8.74924	GRB10;IRS2
PDGFR-beta signaling pathway	5/128	0.107359	0.466991	0	0	2.0467	4.56737	JUN;PPP2R2B;GRB10;FYN;NCK1
Reelin signaling pathway	2/29	0.110104	0.466991	0	0	3.71909	8.20555	FYN;VLDLR
Endothelins	3/63	0.126173	0.496247	0	0	2.5126	5.20133	GNA14;JUN;COL1A2
Alpha-synuclein signaling	2/32	0.129571	0.496247	0	0	3.34667	6.839	FYN;SNCA
IL1-mediated signaling events	2/33	0.136227	0.496247	0	0	3.23854	6.45581	JUN;SQSTM1
HIF-1-alpha transcription factor network	3/66	0.139517	0.496247	0	0	2.39258	4.71235	NT5E;JUN;RORA
IL8- and CXCR2-mediated signaling events	2/34	0.142957	0.496247	0	0	3.13718	6.10247	GNA14;ELMO1
Glypican 3 network	1/8	0.146479	0.496247	0	0	7.16149	13.7563	BMP4
Arf6 signaling events	2/35	0.149756	0.496247	0	0	3.04196	5.77591	GNA14;NCK1
mTOR signaling pathway	3/69	0.153312	0.496247	0	0	2.28348	4.28216	RRAGD;EIF4EBP1;SGK1
AP-1 transcription factor network	3/69	0.153312	0.496247	0	0	2.28348	4.28216	JUN;COL1A2;ATF3
ErbB4 signaling events	2/38	0.170511	0.537765	0	0	2.78803	4.93191	FYN;EREG
Signaling events mediated by Hepatocyte Growth Factor Receptor (c-Met)	3/77	0.191976	0.590326	0	0	2.03578	3.35982	JUN;EIF4EBP1;NCK1
FOXA1 transcription factor network	2/44	0.213216	0.639647	0	0	2.38901	3.6921	AR;JUN
TNF receptor signaling pathway	2/46	0.227681	0.647651	0	0	2.28019	3.37425	CAV1;SQSTM1
JNK signaling in the CD4+ TCR pathway	1/14	0.242109	0.647651	0	0	3.85501	5.46782	JUN
Posttranslational regulation of adherens junction stability and disassembly	2/48	0.242211	0.647651	0	0	2.18082	3.09229	CDH2;FYN
Angiopoietin receptor Tie2-mediated signaling	2/48	0.242211	0.647651	0	0	2.18082	3.09229	FYN;NCK1
Class I PI3K signaling events	2/48	0.242211	0.647651	0	0	2.18082	3.09229	FYN;SGK1
PAR4-mediated thrombin signaling events	1/15	0.256974	0.655267	0	0	3.57947	4.86371	GNA14
ErbB receptor signaling network	1/15	0.256974	0.655267	0	0	3.57947	4.86371	EREG
Regulation of Androgen receptor activity	2/52	0.271361	0.655267	0	0	2.00595	2.61637	AR;JUN
DNA-PK pathway in nonhomologous end joining	1/16	0.271548	0.655267	0	0	3.34066	4.35495	APTX
Direct p53 effectors	4/136	0.277331	0.655267	0	0	1.52109	1.95086	JUN;CAV1;PMAIP1;ATF3
Validated transcriptional targets of TAp63 isoforms	2/53	0.27865	0.655267	0	0	1.96652	2.51281	PMAIP1;DHRS3
Syndecan-3-mediated signaling events	1/17	0.285837	0.655267	0	0	3.13171	3.92195	FYN
Thromboxane A2 receptor signaling	2/56	0.300476	0.655267	0	0	1.85698	2.23281	GNA14;FYN
Fc-epsilon receptor I signaling in mast cells	2/58	0.314968	0.655267	0	0	1.79048	2.06851	JUN;FYN
FGF signaling pathway	2/59	0.322189	0.655267	0	0	1.75897	1.99224	JUN;CDH2
Canonical Wnt signaling pathway	1/20	0.327048	0.655267	0	0	2.63683	2.94704	CAV1
IL4-mediated signaling events	2/60	0.329392	0.655267	0	0	1.72856	1.91958	COL1A2;IRS2
Neurotrophic factor-mediated Trk receptor signaling	2/61	0.336573	0.655267	0	0	1.69917	1.8503	ELMO1;SQSTM1
E-cadherin signaling in keratinocytes	1/21	0.340251	0.655267	0	0	2.50486	2.70042	FYN
Sphingosine 1-phosphate (S1P) pathway	1/21	0.340251	0.655267	0	0	2.50486	2.70042	GNA14
p38 signaling mediated by MAPKAP kinases	1/21	0.340251	0.655267	0	0	2.50486	2.70042	HSPB1
Validated targets of C-MYC transcriptional repression	2/63	0.350864	0.655267	0	0	1.6433	1.72112	COL1A2;DDIT3
TCR signaling in naive CD4+ T cells	2/64	0.35797	0.655267	0	0	1.61671	1.66085	FYN;NCK1
Regulation of retinoblastoma protein	2/64	0.35797	0.655267	0	0	1.61671	1.66085	JUN;CCND2
LPA receptor mediated events	2/65	0.365048	0.655267	0	0	1.59096	1.60326	GNA14;JUN
Signaling events mediated by PRL	1/23	0.365887	0.655267	0	0	2.27691	2.28928	ATF5
RXR and RAR heterodimerization with other nuclear receptor	1/24	0.37833	0.655267	0	0	2.1778	2.1168	ABCA1
p75(NTR)-mediated signaling	2/68	0.386095	0.655267	0	0	1.51841	1.44503	SQSTM1;RHOB
VEGFR3 signaling in lymphatic endothelium	1/25	0.39053	0.655267	0	0	2.08696	1.96226	COL1A2
ALK1 signaling events	1/25	0.39053	0.655267	0	0	2.08696	1.96226	CAV1
Insulin-mediated glucose transport	1/27	0.414217	0.655267	0	0	1.92622	1.69771	RHOQ
IL8- and CXCR1-mediated signaling events	1/28	0.425713	0.655267	0	0	1.85479	1.58397	GNA14
Wnt signaling network	1/28	0.425713	0.655267	0	0	1.85479	1.58397	FZD2
Nectin adhesion pathway	1/29	0.436985	0.655267	0	0	1.78845	1.48058	CLDN1
Lissencephaly gene (LIS1) in neuronal migration and development	1/29	0.436985	0.655267	0	0	1.78845	1.48058	VLDLR
S1P3 pathway	1/29	0.436985	0.655267	0	0	1.78845	1.48058	GNA14
Calcium signaling in the CD4+ TCR pathway	1/29	0.436985	0.655267	0	0	1.78845	1.48058	JUN
CD40/CD40L signaling	1/30	0.448036	0.655267	0	0	1.7267	1.38633	JUN
IL2 signaling events mediated by STAT5	1/30	0.448036	0.655267	0	0	1.7267	1.38633	CCND2
Nongenotropic Androgen signaling	1/30	0.448036	0.655267	0	0	1.7267	1.38633	AR
Ephrin B reverse signaling	1/30	0.448036	0.655267	0	0	1.7267	1.38633	FYN
Regulation of p38-alpha and p38-beta	1/30	0.448036	0.655267	0	0	1.7267	1.38633	FYN
Osteopontin-mediated events	1/31	0.458871	0.655267	0	0	1.66905	1.30017	JUN
Aurora A signaling	1/31	0.458871	0.655267	0	0	1.66905	1.30017	CPEB1
Validated targets of C-MYC transcriptional activation	2/79	0.460374	0.655267	0	0	1.30077	1.00902	CCND2;PMAIP1
IL12 signaling mediated by STAT4	1/32	0.469494	0.655267	0	0	1.61513	1.2212	JUN
Noncanonical Wnt signaling pathway	1/32	0.469494	0.655267	0	0	1.61513	1.2212	FZD2
EPO signaling pathway	1/33	0.479908	0.655267	0	0	1.56458	1.14865	IRS2
N-cadherin signaling events	1/34	0.490119	0.655267	0	0	1.51709	1.08185	CDH2
EGF receptor (ErbB1) signaling pathway	1/34	0.490119	0.655267	0	0	1.51709	1.08185	NCK1
EPHA forward signaling	1/34	0.490119	0.655267	0	0	1.51709	1.08185	FYN
IL23-mediated signaling events	1/37	0.519566	0.681186	0	0	1.39045	0.910413	CXCL1
Regulation of RAC1 activity	1/38	0.529	0.681186	0	0	1.3528	0.861419	ELMO1
EPHB forward signaling	1/39	0.538249	0.681186	0	0	1.31714	0.815877	NCK1
ATR signaling pathway	1/39	0.538249	0.681186	0	0	1.31714	0.815877	PPP2R2B
amb2 Integrin signaling	1/40	0.547317	0.681186	0	0	1.2833	0.773477	FYN
Plasma membrane estrogen receptor signaling	1/40	0.547317	0.681186	0	0	1.2833	0.773477	GNA14
Stabilization and expansion of the E-cadherin adherens junction	1/41	0.556208	0.681186	0	0	1.25115	0.733942	NCK1
Urokinase-type plasminogen activator (uPA) and uPAR-mediated signaling	1/42	0.564924	0.681186	0	0	1.22057	0.697025	VLDLR
PAR1-mediated thrombin signaling events	1/43	0.573469	0.681186	0	0	1.19145	0.662507	GNA14
ErbB2/ErbB3 signaling events	1/44	0.581847	0.681186	0	0	1.16368	0.630189	JUN
CXCR4-mediated signaling events	2/100	0.586339	0.681186	0	0	1.02093	0.545032	FYN;RHOB
RhoA signaling pathway	1/45	0.590061	0.681186	0	0	1.13718	0.599894	JUN
IL6-mediated signaling events	1/46	0.598114	0.681186	0	0	1.11185	0.571462	JUN
Calcineurin-regulated NFAT-dependent transcription in lymphocytes	1/46	0.598114	0.681186	0	0	1.11185	0.571462	JUN
Presenilin action in Notch and Wnt signaling	1/46	0.598114	0.681186	0	0	1.11185	0.571462	JUN
PLK1 signaling events	1/46	0.598114	0.681186	0	0	1.11185	0.571462	TPT1
Notch-mediated HES/HEY network	1/48	0.61375	0.686284	0	0	1.06443	0.51962	AR
FoxO family signaling	1/48	0.61375	0.686284	0	0	1.06443	0.51962	SGK1
Signaling events mediated by Stem cell factor receptor (c-Kit)	1/52	0.643224	0.712761	0	0	0.980743	0.432766	GRB10
TCR signaling in naive CD8+ T cells	1/53	0.650235	0.714097	0	0	0.961834	0.413994	FYN
RAC1 signaling pathway	1/54	0.657108	0.715259	0	0	0.943638	0.39624	JUN
Coregulation of Androgen receptor activity	1/59	0.689507	0.737473	0	0	0.862069	0.320499	AR
Notch signaling pathway	1/59	0.689507	0.737473	0	0	0.862069	0.320499	MFAP5
BCR signaling pathway	1/64	0.718851	0.755716	0	0	0.793448	0.261918	JUN
Validated nuclear estrogen receptor alpha network	1/64	0.718851	0.755716	0	0	0.793448	0.261918	JUN
Downstream signaling in naive CD8+ T cells	1/66	0.729799	0.759823	0	0	0.768955	0.24221	JUN
Regulation of Telomerase	1/67	0.735113	0.759823	0	0	0.757266	0.233034	JUN
CDC42 signaling events	1/70	0.750436	0.769197	0	0	0.72423	0.207927	JUN
p73 transcription factor network	1/78	0.787111	0.800121	0	0	0.64872	0.155294	TUBA1A
C-MYB transcription factor network	1/82	0.80338	0.809965	0	0	0.616558	0.134981	COL1A2
ErbB1 downstream signaling	1/105	0.875556	0.875556	0	0	0.479638	0.0637419	JUN

## Sheet: DN_ALDH_HIvLO_GO
Term	Overlap	P-value	Adjusted P-value	Old P-value	Old Adjusted P-value	Odds Ratio	Combined Score	Genes
PLK1 signaling events	20/46	3.57396e-17	4.50319e-15	0	0	20.6982	783.847	ERCC6L;PLK1;BUB1B;CDC25C;NDC80;AURKA;CDC25B;CDC20;CENPE;TPX2;CCNB1;PRC1;INCENP;CDK1;CLSPN;FBXO5;KIF20A;ECT2;BUB1;SPC24
Aurora B signaling	17/39	8.11451e-15	5.11214e-13	0	0	20.7097	671.93	CDCA8;NCAPG;KIF23;SMC4;CENPA;NCAPH;AURKB;NDC80;AURKA;SMC2;RACGAP1;INCENP;BIRC5;NCAPD2;KIF2C;KIF20A;BUB1
FOXM1 transcription factor network	14/40	6.93104e-11	2.46892e-09	0	0	14.3682	336.107	PLK1;BRCA2;FOXM1;CENPA;AURKB;CDC25B;CCNA2;CCNB2;CCNB1;CENPF;CCNE1;CDK1;BIRC5;NEK2
E2F transcription factor network	18/72	7.83783e-11	2.46892e-09	0	0	8.93119	207.824	RRM1;CDKN2C;RRM2;BRCA1;CDC6;CCNA2;DHFR;POLA1;RBL1;ORC1;CCNE1;MCM3;E2F1;CDK1;E2F2;MYBL2;TK1;E2F7
Fanconi anemia pathway	12/47	8.88549e-08	2.10562e-06	0	0	9.11915	148.061	FANCI;BLM;BRIP1;FANCD2;UBE2T;CHEK1;FANCA;RPA2;BRCA1;FANCB;BRCA2;FANCG
ATR signaling pathway	11/39	1.00268e-07	2.10562e-06	0	0	10.4384	168.219	CCNA2;RAD51;FANCD2;CHEK1;PLK1;TIMELESS;RPA2;CLSPN;CDC6;BRCA2;CDC25C
Aurora A signaling	9/31	1.13432e-06	2.04178e-05	0	0	10.8432	148.437	TPX2;TACC3;BIRC5;BRCA1;CENPA;AURKB;DLGAP5;AURKA;CDC25B
BARD1 signaling events	7/29	6.7672e-05	0.00106583	0	0	8.4104	80.7469	BARD1;RAD51;FANCD2;CCNE1;FANCA;BRCA1;FANCG
p73 transcription factor network	9/78	0.00220583	0.0308817	0	0	3.4488	21.0951	CCNA2;CCNB1;RAD51;CHEK1;PLK1;CDK1;BRCA2;BUB1;ADA
Validated transcriptional targets of deltaNp63 isoforms	6/45	0.00579658	0.0730369	0	0	4.0574	20.8976	TOP2A;CCNB2;HELLS;TCF7L1;BRCA2;ADA
PLK3 signaling events	2/5	0.0125259	0.143479	0	0	17.5189	76.7319	CCNE1;CDC25C
Class IB PI3K non-lipid kinase events	2/6	0.0183341	0.192508	0	0	13.1385	52.5407	PIK3CG;PIK3R5
FOXA2 and FOXA3 transcription factor networks	5/45	0.0240283	0.232889	0	0	3.29195	12.2741	FOXA1;HMGCS1;UCP2;CPT1C;FOXA2
ATM pathway	4/34	0.0350375	0.315337	0	0	3.50844	11.7579	BLM;FANCD2;BRCA1;CDC25C
FOXA1 transcription factor network	4/44	0.0773046	0.649359	0	0	2.62996	6.7327	FOXA1;DSCAM;BRCA1;FOXA2
Regulation of retinoblastoma protein	5/64	0.0858526	0.676089	0	0	2.22963	5.47401	CCNA2;DNMT1;CCNE1;E2F1;E2F2
Circadian rhythm pathway	2/15	0.103307	0.765689	0	0	4.04072	9.17262	CHEK1;TIMELESS
IL2 signaling events mediated by PI3K	3/35	0.136463	0.932227	0	0	2.46324	4.90604	MYB;E2F1;JAK3
Regulation of RAC1 activity	3/38	0.162719	0.932227	0	0	2.25176	4.08858	TIAM1;RACGAP1;ARHGEF25
Regulation of nuclear beta catenin signaling and target gene transcription	5/79	0.165002	0.932227	0	0	1.77629	3.20051	TLE2;TCF7L1;INCENP;KRT1;ADCY7
Signaling events mediated by the Hedgehog family	2/22	0.192864	0.932227	0	0	2.62551	4.32099	STIL;IHH
Signaling events mediated by PRL	2/23	0.206404	0.932227	0	0	2.50036	3.94536	CCNA2;CCNE1
Validated nuclear estrogen receptor alpha network	4/64	0.20852	0.932227	0	0	1.75148	2.74583	C3;DSCAM;TRIM59;BRCA1
CXCR3-mediated signaling events	3/43	0.209345	0.932227	0	0	1.96977	3.08028	PIK3R3;ARRB1;CXCL13
Beta1 integrin cell surface interactions	4/66	0.224095	0.932227	0	0	1.69481	2.5349	COL2A1;COL6A3;THBS2;TGM2
Syndecan-1-mediated signaling events	3/46	0.238586	0.932227	0	0	1.83206	2.62539	COL2A1;COL8A1;COL6A3
Regulation of RhoA activity	3/46	0.238586	0.932227	0	0	1.83206	2.62539	ARHGEF25;PLEKHG6;ECT2
Posttranslational regulation of adherens junction stability and dissassembly	3/48	0.258445	0.932227	0	0	1.75046	2.36849	RET;TIAM1;ROBO1
Class I PI3K signaling events	3/48	0.258445	0.932227	0	0	1.75046	2.36849	PIK3R3;PIK3CG;PIK3R5
Notch-mediated HES/HEY network	3/48	0.258445	0.932227	0	0	1.75046	2.36849	HEY1;MYB;E2F1
IL8- and CXCR1-mediated signaling events	2/28	0.275065	0.932227	0	0	2.01899	2.60601	ARRB1;PIK3CG
Wnt signaling network	2/28	0.275065	0.932227	0	0	2.01899	2.60601	KREMEN2;ROR2
Beta2 integrin cell surface interactions	2/29	0.288835	0.932227	0	0	1.94412	2.41439	C3;PROC
IL2 signaling events mediated by STAT5	2/30	0.302574	0.932227	0	0	1.87459	2.24094	CCNA2;JAK3
Regulation of CDC42 activity	2/30	0.302574	0.932227	0	0	1.87459	2.24094	RACGAP1;ARHGEF25
Validated transcriptional targets of TAp63 isoforms	3/53	0.308851	0.932227	0	0	1.575	1.85046	NQO1;PLK1;ADA
Nephrin/Neph1 signaling in the kidney podocyte	2/31	0.316264	0.932227	0	0	1.80985	2.08346	TRPC6;PIK3R3
Regulation of Ras family activation	2/31	0.316264	0.932227	0	0	1.80985	2.08346	CAMK2B;RASGRP1
RAC1 signaling pathway	3/54	0.318997	0.932227	0	0	1.54404	1.76418	CYFIP2;RACGAP1;IQGAP3
Validated targets of C-MYC transcriptional activation	4/79	0.330606	0.932227	0	0	1.40009	1.54966	LDHA;CCNB1;BIRC5;TK1
Thromboxane A2 receptor signaling	3/56	0.339291	0.932227	0	0	1.48562	1.6058	PIK3CG;TGM2;PIK3R5
C-MYB transcription factor network	4/82	0.355812	0.932227	0	0	1.34603	1.39093	CCNB1;MYB;MCM4;ADA
IL8- and CXCR2-mediated signaling events	2/34	0.356904	0.932227	0	0	1.63992	1.68959	ARRB1;PIK3CG
EPHA forward signaling	2/34	0.356904	0.932227	0	0	1.63992	1.68959	PIK3CG;PIK3R5
Arf6 signaling events	2/35	0.370264	0.932227	0	0	1.59014	1.57987	ACAP1;ARRB1
IL4-mediated signaling events	3/60	0.379704	0.932227	0	0	1.38108	1.33738	MYB;ALOX15;JAK3
IL23-mediated signaling events	2/37	0.396638	0.932227	0	0	1.49912	1.38628	IL24;IL18
E-cadherin signaling in the nascent adherens junction	2/39	0.422491	0.932227	0	0	1.41794	1.22168	CYFIP2;TIAM1
LPA4-mediated signaling events	1/15	0.429837	0.932227	0	0	1.87339	1.5818	ADCY7
Arf6 downstream pathway	1/15	0.429837	0.932227	0	0	1.87339	1.5818	TIAM1
Validated nuclear estrogen receptor beta network	1/15	0.429837	0.932227	0	0	1.87339	1.5818	C3
HIF-1-alpha transcription factor network	3/66	0.439173	0.932227	0	0	1.24915	1.02788	LDHA;EGLN3;HDAC7
Signaling events mediated by TCPTP	2/42	0.460157	0.932227	0	0	1.31139	1.01788	PIK3R3;JAK3
AP-1 transcription factor network	3/69	0.468097	0.932227	0	0	1.19219	0.904965	MYB;PENK;CDK1
PAR1-mediated thrombin signaling events	2/43	0.472392	0.932227	0	0	1.27934	0.959435	TRPC6;ARRB1
CDC42 signaling events	3/70	0.477591	0.932227	0	0	1.17433	0.867833	TIAM1;DIAPH3;IQGAP3
EPHA2 forward signaling	1/18	0.490463	0.932227	0	0	1.54255	1.09893	TIAM1
Hypoxic and oxygen homeostasis regulation of HIF-1-alpha	1/18	0.490463	0.932227	0	0	1.54255	1.09893	EGLN3
Integrins in angiogenesis	3/72	0.496336	0.932227	0	0	1.14018	0.798695	COL2A1;COL8A1;COL6A3
Integrin-linked kinase signaling	2/45	0.496351	0.932227	0	0	1.21971	0.854371	TACC3;AURKA
Presenilin action in Notch and Wnt signaling	2/46	0.508068	0.932227	0	0	1.19193	0.807101	KREMEN2;PPARD
PDGFR-beta signaling pathway	5/128	0.50897	0.932227	0	0	1.06593	0.719894	CYFIP2;PIK3R3;PIK3CG;SIPA1;PIK3R5
Cellular roles of Anthrax toxin	1/19	0.509205	0.932227	0	0	1.45678	0.983189	IL18
FoxO family signaling	2/48	0.53096	0.932227	0	0	1.13998	0.721689	CCNB1;PLK1
p38 signaling mediated by MAPKAP kinases	1/21	0.544649	0.932227	0	0	1.31097	0.796561	CDC25B
Direct p53 effectors	5/136	0.563027	0.932227	0	0	1.00042	0.574668	FOXA1;STEAP3;CCNB1;E2F1;E2F2
Visual signal transduction: Rods	1/23	0.577537	0.932227	0	0	1.19166	0.654203	RPE65
Visual signal transduction: Cones	1/23	0.577537	0.932227	0	0	1.19166	0.654203	RPE65
RXR and RAR heterodimerization with other nuclear receptor	1/24	0.593081	0.932227	0	0	1.13979	0.595457	PPARD
Alpha9 beta1 integrin signaling events	1/25	0.608053	0.932227	0	0	1.09225	0.543385	TGM2
ALK1 signaling events	1/25	0.608053	0.932227	0	0	1.09225	0.543385	TGFB3
IL27-mediated signaling events	1/26	0.622475	0.932227	0	0	1.0485	0.497044	IL18
p53 pathway	2/57	0.624711	0.932227	0	0	0.952995	0.448351	CCNA2;CHEK1
ATF-2 transcription factor network	2/58	0.634182	0.932227	0	0	0.935929	0.426241	CCNA2;BRCA1
p38 MAPK signaling pathway	1/27	0.636367	0.932227	0	0	1.00812	0.455651	CAMK2B
Glypican 1 network	1/27	0.636367	0.932227	0	0	1.00812	0.455651	TGFB3
TRAIL signaling pathway	1/28	0.649748	0.932227	0	0	0.970734	0.418551	PIK3R3
Retinoic acid receptors-mediated signaling	1/28	0.649748	0.932227	0	0	0.970734	0.418551	CDK1
Lissencephaly gene (LIS1) in neuronal migration and development	1/29	0.662638	0.932227	0	0	0.936016	0.385195	LRP8
Reelin signaling pathway	1/29	0.662638	0.932227	0	0	0.936016	0.385195	LRP8
CD40/CD40L signaling	1/30	0.675054	0.932227	0	0	0.903693	0.355117	JAK3
Ephrin B reverse signaling	1/30	0.675054	0.932227	0	0	0.903693	0.355117	TIAM1
Regulation of p38-alpha and p38-beta	1/30	0.675054	0.932227	0	0	0.903693	0.355117	MAP3K12
Endothelins	2/63	0.678735	0.932227	0	0	0.85899	0.33288	TRPC6;ADCY7
Validated targets of C-MYC transcriptional repression	2/63	0.678735	0.932227	0	0	0.85899	0.33288	RBL1;BRCA1
TCR signaling in naive CD4+ T cells	2/64	0.687095	0.932227	0	0	0.845091	0.317148	RASGRP1;FYB
LPA receptor mediated events	2/65	0.695276	0.932227	0	0	0.831633	0.302254	TIAM1;ADCY7
Alpha4 beta1 integrin signaling events	1/32	0.698534	0.932227	0	0	0.845302	0.30327	THBS2
IL12 signaling mediated by STAT4	1/32	0.698534	0.932227	0	0	0.845302	0.30327	IL18
Noncanonical Wnt signaling pathway	1/32	0.698534	0.932227	0	0	0.845302	0.30327	ROR2
EPO signaling pathway	1/33	0.70963	0.932227	0	0	0.818844	0.280872	TRPC6
Regulation of Telomerase	2/67	0.711107	0.932227	0	0	0.805961	0.274778	BLM;E2F1
CXCR4-mediated signaling events	3/100	0.716383	0.932227	0	0	0.80987	0.270124	PIK3R3;PIK3CG;PIK3R5
EGF receptor (ErbB1) signaling pathway	1/34	0.720319	0.932227	0	0	0.793989	0.260477	PIK3R3
Signaling events mediated by HDAC Class II	1/34	0.720319	0.932227	0	0	0.793989	0.260477	HDAC7
HIF-2-alpha transcription factor network	1/34	0.720319	0.932227	0	0	0.793989	0.260477	EGLN3
Validated transcriptional targets of AP1 family members Fra1 and Fra2	1/35	0.730615	0.932227	0	0	0.770596	0.241866	CCNA2
ErbB1 downstream signaling	3/105	0.746673	0.932227	0	0	0.769969	0.22493	CYFIP2;DIAPH3;PIK3R3
ErbB4 signaling events	1/38	0.759286	0.932227	0	0	0.708005	0.194968	PIK3R3
Signaling events regulated by Ret tyrosine kinase	1/38	0.759286	0.932227	0	0	0.708005	0.194968	RET
FAS (CD95) signaling pathway	1/38	0.759286	0.932227	0	0	0.708005	0.194968	PIK3R3
amb2 Integrin signaling	1/40	0.776686	0.932227	0	0	0.671627	0.169733	MST1R
IFN-gamma pathway	1/40	0.776686	0.932227	0	0	0.671627	0.169733	CAMK2B
Internalization of ErbB1	1/40	0.776686	0.932227	0	0	0.671627	0.169733	PIK3R3
Stabilization and expansion of the E-cadherin adherens junction	1/41	0.784909	0.932227	0	0	0.654802	0.158585	CYFIP2
ErbB2/ErbB3 signaling events	1/44	0.807808	0.932227	0	0	0.609024	0.129984	PIK3R3
a6b1 and a6b4 Integrin signaling	1/45	0.814887	0.932227	0	0	0.595151	0.121831	MST1R
RhoA signaling pathway	1/45	0.814887	0.932227	0	0	0.595151	0.121831	CIT
Calcineurin-regulated NFAT-dependent transcription in lymphocytes	1/46	0.821705	0.932227	0	0	0.581895	0.114269	E2F1
Hedgehog signaling events mediated by Gli proteins	1/47	0.828273	0.932227	0	0	0.569216	0.107248	FOXA2
Arf6 trafficking events	1/49	0.840691	0.932227	0	0	0.545442	0.0946508	ACAP1
Regulation of Androgen receptor activity	1/52	0.857658	0.932227	0	0	0.513277	0.0788134	HDAC7
TCR signaling in naive CD8+ T cells	1/53	0.862903	0.932227	0	0	0.50338	0.0742249	RASGRP1
TGF-beta receptor signaling	1/54	0.867955	0.932227	0	0	0.493856	0.0699379	TGFB3
Caspase Cascade in Apoptosis	1/55	0.87282	0.932227	0	0	0.484686	0.0659297	LMNB1
IL2-mediated signaling events	1/55	0.87282	0.932227	0	0	0.484686	0.0659297	JAK3
SHP2 signaling	1/57	0.882021	0.932227	0	0	0.467327	0.0586679	JAK3
Coregulation of Androgen receptor activity	1/59	0.890557	0.932227	0	0	0.451165	0.0522936	BRCA1
Notch signaling pathway	1/59	0.890557	0.932227	0	0	0.451165	0.0522936	NOTCH3
Neurotrophic factor-mediated Trk receptor signaling	1/61	0.898476	0.932227	0	0	0.436081	0.0466846	TIAM1
IL12-mediated signaling events	1/62	0.902219	0.932227	0	0	0.42891	0.0441341	IL18
Downstream signaling in naive CD8+ T cells	1/66	0.91586	0.932227	0	0	0.402431	0.0353703	TNFRSF18
Signaling events mediated by HDAC Class I	1/66	0.91586	0.932227	0	0	0.402431	0.0353703	HDAC7
p75(NTR)-mediated signaling	1/68	0.92195	0.932227	0	0	0.390378	0.0317236	E2F1
mTOR signaling pathway	1/69	0.924829	0.932227	0	0	0.384617	0.0300566	CCNE1
Regulation of nuclear SMAD2/3 signaling	1/81	0.952117	0.952117	0	0	0.32672	0.0160314	RBL1

## Sheet: GOplot
Term	Overlap	P-value	Adjusted P-value	Old P-value	Old Adjusted P-value	Odds Ratio	Combined Score	Genes
Insulin Pathway	6/43	0.00018016	0.0221596	0	0	8.22196	70.887	CAV1;EIF4EBP1;GRB10;SGK1;RHOQ;NCK1
BMP receptor signaling	5/42	0.00132114	0.0812499	0	0	6.83393	45.3039	PPP1R15A;BMP4;BAMBI;FST;BMP6
Syndecan-1-mediated signaling events	5/46	0.00199711	0.0818815	0	0	6.16594	38.3278	COL1A2;COL4A1;COL4A4;COL5A2;COL4A3
Signaling events mediated by PTP1B	5/52	0.00344136	0.105822	0	0	5.37715	30.4986	CDH2;CAV1;LEPR;NOX4;FYN
Signaling events regulated by Ret tyrosine kinase	4/38	0.0063398	0.129966	0	0	5.93511	30.0371	JUN;GRB10;IRS2;NCK1
Signaling mediated by p38-alpha and p38-beta	4/38	0.0063398	0.129966	0	0	5.93511	30.0371	JUN;DDIT3;EIF4EBP1;HSPB1
Beta1 integrin cell surface interactions	5/66	0.00947907	0.150985	0	0	4.14009	19.2873	COL1A2;COL4A1;COL4A4;COL4A3;COL5A2
PLK1 signaling events	20/46	3.57396e-17	4.50319e-15	0	0	20.6982	783.847	ERCC6L;PLK1;BUB1B;CDC25C;NDC80;AURKA;CDC25B;CDC20;CENPE;TPX2;CCNB1;PRC1;INCENP;CDK1;CLSPN;FBXO5;KIF20A;ECT2;BUB1;SPC24
Aurora B signaling	17/39	8.11451e-15	5.11214e-13	0	0	20.7097	671.93	CDCA8;NCAPG;KIF23;SMC4;CENPA;NCAPH;AURKB;NDC80;AURKA;SMC2;RACGAP1;INCENP;BIRC5;NCAPD2;KIF2C;KIF20A;BUB1
FOXM1 transcription factor network	14/40	6.93104e-11	2.46892e-09	0	0	14.3682	336.107	PLK1;BRCA2;FOXM1;CENPA;AURKB;CDC25B;CCNA2;CCNB2;CCNB1;CENPF;CCNE1;CDK1;BIRC5;NEK2
E2F transcription factor network	18/72	7.83783e-11	2.46892e-09	0	0	8.93119	207.824	RRM1;CDKN2C;RRM2;BRCA1;CDC6;CCNA2;DHFR;POLA1;RBL1;ORC1;CCNE1;MCM3;E2F1;CDK1;E2F2;MYBL2;TK1;E2F7
Fanconi anemia pathway	12/47	8.88549e-08	2.10562e-06	0	0	9.11915	148.061	FANCI;BLM;BRIP1;FANCD2;UBE2T;CHEK1;FANCA;RPA2;BRCA1;FANCB;BRCA2;FANCG
ATR signaling pathway	11/39	1.00268e-07	2.10562e-06	0	0	10.4384	168.219	CCNA2;RAD51;FANCD2;CHEK1;PLK1;TIMELESS;RPA2;CLSPN;CDC6;BRCA2;CDC25C
Aurora A signaling	9/31	1.13432e-06	2.04178e-05	0	0	10.8432	148.437	TPX2;TACC3;BIRC5;BRCA1;CENPA;AURKB;DLGAP5;AURKA;CDC25B

## Sheet: AXIN2ALDH_OverlapGenes
SHARED UP	AXIN Hi L2FC	ALDH Hi L2FC			SHARED DOWN	AXIN Hi L2FC	ALDH Hi L2FC
Adora1	3.3071	1.1084			Abi3bp	-1.67207	-3.82868
Anxa8	2.88187	1.82484			Arhgef25	-1.88521	-1.0336
Bst1	3.2314	1.41353			Asb2	-4.94598	-6.24164
Calb1	3.55452	4.30025			Bmp1	-1.56317	-1.58061
Capsl	3.86793	1.2815			Cntnap1	-1.55835	-1.52345
Ccnd2	1.64198	2.2183			Col6a3	-2.9027	-4.8358
Gpt2	1.41211	1.22286			Fbln1	-1.89875	-2.27402
Gulo	4.94548	2.22826			Gpsm2	-1.28883	-1.30174
Kif5c	1.66417	1.09133			Kcng1	-6.86745	-2.49012
Ldhb	1.31658	1.54402			Map3k12	-1.12327	-1.39915
Lgr5	3.79423	5.29666			Nlgn2	-1.37236	-1.14789
Msx2	4.416	1.34299			Oaf	-1.53258	-1.0981
Nt5e	1.82456	2.39955			Oxtr	-3.36542	-1.82937
Pdlim1	2.37139	1.58181			Peli2	-1.13264	-1.51432
Ppp2r2b	3.56284	1.16682			Penk	-3.14671	-3.86706
Psat1	2.25209	1.42911			Rprm	-2.59894	-2.05966
Ptpn22	2.49856	1.29275			Slc29a1	-1.15426	-1.02813
Rassf10	3.39602	1.18358			Speg	-2.57476	-1.78409
Scx	2.87742	1.14498			Spock2	-2.15574	-1.57575

## Sheet: AXIN UP p < 0.005, L2FC1
GeneID	GeneName	logFC	logCPM	F	PValue	FDR	C1	C2	C3	M1	M2	M3
ENSMUSG00000023122	Sult1c2	10.4404	0.731122	184.261	3.26075e-05	0.00107779	0	0	0	187	180	167
ENSMUSG00000031430	Vsig1	10.2024	0.497808	74.49	0.000304606	0.00386543	0	0	0	73	132	242
ENSMUSG00000020218	Wif1	10.0214	2.1851	108.353	1.45069e-05	0.000714671	0	1	0	278	317	876
ENSMUSG00000029375	Cxcl15	9.95801	2.91316	247.93	8.50506e-07	0.00027327	1	1	0	638	626	1192
ENSMUSG00000061808	Ttr	7.86236	0.0672169	81.3636	3.77422e-05	0.00117898	0	1	0	81	108	140
ENSMUSG00000026327	Serpinb11	7.83802	3.2896	97.3948	2.07487e-05	0.000855897	8	5	0	961	616	1616
ENSMUSG00000034785	Dio1	7.81088	0.804853	73.3515	5.31039e-05	0.00139836	2	0	0	141	187	229
ENSMUSG00000044206	Vsig4	7.62733	1.49425	45.7272	0.000242274	0.00344461	2	1	1	718	142	80
ENSMUSG00000038572	Bpifb5	7.45239	3.5901	66.1833	7.43112e-05	0.00167601	9	7	5	284	1324	2253
ENSMUSG00000029260	Ugt2b34	7.3475	1.49608	141.698	5.84319e-06	0.000484431	1	3	1	420	171	329
NA	BC048546	7.32957	1.95932	77.7613	4.38278e-05	0.00128161	5	0	2	275	558	416
ENSMUSG00000030048	Gkn3	7.22375	0.223015	48.69	0.000198865	0.00305485	1	1	0	65	63	238
ENSMUSG00000037025	Foxa2	6.92428	3.55175	128.019	8.25417e-06	0.000567483	14	15	1	1188	1239	1388
ENSMUSG00000078648	Gm17546	6.74983	-0.977723	54.4002	0.000139837	0.00247782	0	1	0	68	46	40
NA	Msx1as	6.73209	0.241059	76.1128	4.70321e-05	0.0013366	0	2	1	108	110	154
NA	Gm20254	6.35328	-1.31719	41.98	0.000316273	0.00396469	0	0	1	39	28	51
ENSMUSG00000047638	Nr1h4	6.12627	1.39593	52.7883	0.000153915	0.00265135	9	1	1	398	255	197
ENSMUSG00000098207	Arl14	6.10095	0.301088	49.4225	0.000189702	0.00297617	4	1	0	157	129	103
NA	D730048J04Rik	6.00552	-0.936369	38.3319	0.000418559	0.00478543	0	2	0	55	63	39
ENSMUSG00000021749	Oit1	5.72949	1.11545	116.047	1.15104e-05	0.000636003	3	5	4	191	161	334
NA	Gm4983	5.6238	-0.80874	43.7277	0.000278607	0.0037048	1	2	0	42	50	79
ENSMUSG00000006538	Ihh	5.44146	4.89594	131.899	7.45796e-06	0.000549259	72	112	30	2510	2698	4329
ENSMUSG00000018211	Wfdc15b	5.43914	2.6801	48.3332	0.000203534	0.00309215	2	15	27	484	636	918
ENSMUSG00000006777	Krt23	5.40629	2.2587	40.1071	0.000364199	0.0043639	20	1	12	761	296	490
ENSMUSG00000050541	Adra1b	5.25496	-0.232278	37.5299	0.000446525	0.00498722	3	0	3	111	85	66
ENSMUSG00000009185	Ccl8	5.16627	2.97087	44.7499	0.000259222	0.00355118	24	16	25	1836	410	329
ENSMUSG00000042808	Gpx2	5.13208	2.77736	100.85	1.84622e-05	0.000809304	25	29	6	732	695	758
ENSMUSG00000038115	Ano2	5.13018	4.10497	240.012	9.51975e-07	0.000278647	29	61	59	1706	1632	2156
ENSMUSG00000026220	Slc16a14	5.12909	0.670174	76.1372	4.69826e-05	0.0013366	2	4	7	209	140	151
ENSMUSG00000029553	Tfec	5.02449	0.0389033	46.5045	0.000229798	0.00333466	3	5	1	183	68	70
ENSMUSG00000061877	BC048679	4.98429	3.61266	48.1807	0.000205572	0.00309989	12	86	23	911	1027	1934
ENSMUSG00000036813	Entpd8	4.97856	1.82241	53.536	0.00014717	0.00256949	23	5	5	323	418	372
ENSMUSG00000034450	Gulo	4.94548	4.39171	215.177	1.39007e-06	0.000290108	43	106	60	2114	2654	1908
ENSMUSG00000055978	Fut2	4.84593	3.6334	138.868	6.25913e-06	0.000505241	32	75	26	1042	1447	1431
ENSMUSG00000035686	Thrsp	4.7687	4.71575	138.791	6.27102e-06	0.000505241	115	109	68	1581	3701	2965
NA	1110017F19Rik	4.75404	0.963214	52.0221	0.000161244	0.00271992	2	9	10	195	137	275
ENSMUSG00000075304	Sp5	4.7443	2.39167	83.8336	3.41851e-05	0.00110804	14	12	31	477	453	720
ENSMUSG00000029086	Prom1	4.71802	4.36465	209.931	1.51397e-06	0.000300151	82	95	60	1609	1858	3025
ENSMUSG00000042607	Asb4	4.69324	3.80426	136.586	6.62247e-06	0.000520015	31	81	52	1238	1179	1990
ENSMUSG00000101026	D730001G18Rik	4.68355	-0.423072	41.2199	0.000334685	0.00408945	4	3	1	44	112	66
ENSMUSG00000061959	Ces1e	4.68073	3.2423	341.003	2.79953e-07	0.000228538	32	38	40	976	1137	873
ENSMUSG00000020159	Gabrp	4.66779	5.29579	60.8443	9.76022e-05	0.00197361	41	214	211	3290	4814	4272
NA	Gm9524	4.66011	2.13006	94.2404	2.31624e-05	0.00091403	10	18	23	347	388	633
ENSMUSG00000004035	Gstm7	4.65372	6.06474	100.729	1.85367e-05	0.000809304	148	498	179	7264	5338	8638
ENSMUSG00000032358	Fam83b	4.62646	2.09254	75.4191	4.84701e-05	0.0013476	6	21	24	530	437	377
ENSMUSG00000028148	Them5	4.57333	1.9091	68.6524	6.59505e-05	0.0015981	8	31	9	345	428	399
ENSMUSG00000027360	Hdc	4.47865	6.84866	205.496	1.62998e-06	0.000300168	469	805	310	10931	13042	12277
ENSMUSG00000027577	Chrna4	4.45871	2.5768	101.033	1.83503e-05	0.000809304	18	21	40	529	749	582
ENSMUSG00000056148	Rdh9	4.43147	1.90658	127.286	8.41669e-06	0.000571043	24	15	12	367	361	439
ENSMUSG00000089789	Rdh1	4.41886	2.96586	98.4747	1.99969e-05	0.000833809	16	58	36	917	684	855
ENSMUSG00000021469	Msx2	4.416	2.96872	80.0819	3.97755e-05	0.00121358	13	56	41	786	814	850
ENSMUSG00000040412	5330417C22Rik	4.41523	5.60773	110.168	1.37175e-05	0.000694403	116	312	259	3861	6815	4557
ENSMUSG00000029273	Sult1d1	4.40095	6.48561	90.673	2.63438e-05	0.000971526	227	786	294	9779	7072	11390
ENSMUSG00000035165	Kcne3	4.38124	1.38011	108.463	1.44573e-05	0.000714504	11	10	15	263	216	327
ENSMUSG00000017607	Tns4	4.37381	3.9932	153.824	4.41387e-06	0.000440504	66	59	100	1685	1205	2110
ENSMUSG00000029304	Spp1	4.37165	4.20499	49.4983	0.000188785	0.00297384	66	50	142	2033	2879	870
ENSMUSG00000022683	Pla2g10	4.36475	3.15467	41.9657	0.000316606	0.00396565	15	99	20	1018	805	972
ENSMUSG00000043760	Pkhd1	4.33441	3.78919	128.201	8.21451e-06	0.000567278	43	92	70	949	1733	1609
ENSMUSG00000030800	Prss8	4.30815	4.46241	57.3927	0.000117798	0.00223021	35	210	95	2680	2486	1764
ENSMUSG00000054662	Ano9	4.27924	2.63319	195.448	1.93807e-06	0.00032587	23	35	36	599	622	708
ENSMUSG00000031881	Cdh16	4.26661	4.64521	97.4663	2.06978e-05	0.000855897	65	202	125	1853	2659	3262
ENSMUSG00000032311	Nrg4	4.2607	2.52222	142.101	5.78674e-06	0.00048419	36	35	18	506	574	701
ENSMUSG00000048450	Msx1	4.25842	8.16206	386.956	1.79826e-07	0.000228538	1155	1919	1412	26016	32755	30627
ENSMUSG00000032561	Acpp	4.25114	6.79146	191.138	2.093e-06	0.000334815	333	797	614	10655	11965	11987
ENSMUSG00000101389	Ms4a4a	4.23864	1.33065	38.4175	0.00041571	0.00476342	18	7	13	490	165	136
NA	1190003J15Rik	4.20924	0.517612	50.0608	0.000182154	0.00290789	6	8	8	70	182	178
ENSMUSG00000021638	Ocln	4.20105	4.94443	75.4788	4.83443e-05	0.0013476	68	307	135	3179	3475	2955
ENSMUSG00000027513	Pck1	4.19285	-0.0990495	49.8935	0.000184095	0.00292079	3	4	7	116	62	103
ENSMUSG00000029754	Dlx6	4.19195	4.95008	100.465	1.87004e-05	0.000809304	74	245	187	3110	3772	2752
ENSMUSG00000027375	Mal	4.1907	4.37409	98.5649	1.99357e-05	0.000833809	49	148	140	1867	2402	2175
ENSMUSG00000045394	Epcam	4.18627	6.9022	158.429	3.98987e-06	0.000425837	390	1048	551	11854	13457	11994
ENSMUSG00000071506	Tmem139	4.1859	0.619696	100.843	1.84667e-05	0.000809304	8	8	8	163	159	146
ENSMUSG00000029868	Trpv6	4.1815	2.72523	45.8601	0.000240082	0.0034292	12	75	24	622	807	619
ENSMUSG00000027831	Veph1	4.17786	2.55147	60.0583	0.000101785	0.00204481	13	32	49	542	483	790
ENSMUSG00000000308	Ckmt1	4.17187	3.13522	45.3081	0.000249363	0.00347513	28	105	17	947	761	1028
ENSMUSG00000050520	Cldn8	4.17138	3.72023	252.819	7.94719e-07	0.00027327	54	105	60	1376	1441	1286
ENSMUSG00000039419	Cntnap2	4.15755	1.56486	107.426	1.49324e-05	0.000727473	13	17	18	304	384	222
ENSMUSG00000026417	Pigr	4.14917	4.68245	105.11	1.60683e-05	0.000746935	76	253	110	2523	2847	2618
ENSMUSG00000039865	Slc44a3	4.14406	3.88346	138.247	6.35545e-06	0.000506765	44	120	85	1868	1364	1385
ENSMUSG00000025330	Padi4	4.14391	3.52505	38.9984	0.000397005	0.0046071	64	25	97	1824	1277	520
ENSMUSG00000021118	Plek2	4.14087	1.78862	118.418	1.07498e-05	0.000627477	16	29	13	370	380	316
ENSMUSG00000017390	Aldoc	4.13979	3.44959	155.833	4.22217e-06	0.000432534	51	93	42	980	1011	1395
ENSMUSG00000020566	Atp6v1c2	4.13696	1.43411	38.7124	0.000406075	0.00468774	12	5	26	374	218	245
ENSMUSG00000029755	Dlx5	4.12871	6.25522	182.577	2.45103e-06	0.000346506	276	673	367	8218	8775	6821
ENSMUSG00000037279	Ovol2	4.12508	2.2497	66.9791	7.14754e-05	0.00164611	10	44	27	489	498	483
ENSMUSG00000036805	Noxa1	4.11904	3.75275	70.4789	6.05289e-05	0.00152631	38	61	125	1194	1642	1335
ENSMUSG00000070473	Cldn3	4.11322	7.37931	124.964	8.95918e-06	0.000593402	587	1618	715	14988	17909	18798
ENSMUSG00000057092	Fxyd3	4.11118	3.58092	45.1268	0.000252511	0.00349695	18	134	58	1252	1372	1092
NA	Gm106	4.09279	4.53978	48.2071	0.000205217	0.00309989	40	231	139	2692	1542	3025
NA	Gpr128	4.09145	3.2437	142.585	5.72004e-06	0.000483515	43	89	35	1041	1000	900
ENSMUSG00000025082	Vwa2	4.07445	4.61579	118.157	1.08305e-05	0.000627477	160	188	87	1739	3456	2355
ENSMUSG00000040724	Kcna2	4.07428	4.15065	127.548	8.35801e-06	0.000569717	78	101	129	1492	1407	2594
ENSMUSG00000029757	Dync1i1	4.06582	2.92514	101.051	1.83393e-05	0.000809304	22	70	43	801	809	741
ENSMUSG00000012350	Ehf	4.06572	7.20249	106.31	1.54664e-05	0.000736155	424	1415	810	14230	15590	15900
ENSMUSG00000048826	Dact2	4.06236	5.54621	212.606	1.44909e-06	0.000291117	209	424	208	5960	4468	4175
ENSMUSG00000006567	Atp7b	4.05888	2.05872	70.1395	6.14919e-05	0.00152912	37	23	13	311	421	543
ENSMUSG00000063354	Slc39a4	4.0541	6.76067	169.114	3.18961e-06	0.000397903	431	1025	511	13771	9372	10755
ENSMUSG00000025902	Sox17	4.04636	7.04012	89.6845	2.73231e-05	0.000987525	361	1093	913	10543	16233	13866
NA	D730039F16Rik	4.039	1.87345	91.007	2.60231e-05	0.000968782	14	20	30	327	422	373
ENSMUSG00000078234	Klhdc7a	4.03854	4.3786	191.699	2.07196e-06	0.000334815	107	184	88	2108	2598	1737
ENSMUSG00000056162	Cndp1	4.03573	3.83221	124.699	9.02386e-06	0.000593749	44	125	89	1527	1601	1287
ENSMUSG00000031147	Magix	4.02424	2.29077	121.192	9.93956e-06	0.000602961	39	23	25	558	561	391
ENSMUSG00000051727	Kctd14	4.00643	4.00155	225.029	1.19045e-06	0.000278894	97	78	114	1477	1887	1578
ENSMUSG00000008601	Rab25	3.99506	3.68756	62.0548	9.15817e-05	0.00189903	44	161	41	1366	1346	1275
ENSMUSG00000022286	Grhl2	3.98638	5.50292	192.816	2.03088e-06	0.000334209	182	432	242	4833	4943	4279
NA	1810019J16Rik	3.98526	3.23551	118.195	1.08186e-05	0.000627477	32	85	59	1112	1027	778
ENSMUSG00000021213	Akr1c13	3.98334	3.23335	73.8527	5.19303e-05	0.00138502	29	108	42	1171	835	913
ENSMUSG00000054702	Ap1s3	3.97886	4.9989	303.364	4.21251e-07	0.000232726	156	227	213	3134	3958	2787
ENSMUSG00000040693	Slco4c1	3.97579	1.49332	52.0987	0.000160492	0.00271992	7	25	20	233	234	390
ENSMUSG00000026638	Irf6	3.97539	7.16095	103.724	1.68011e-05	0.0007735	501	1545	701	14258	17045	12972
NA	BC066135	3.97149	1.83367	99.4241	1.93645e-05	0.000825207	21	33	13	435	362	300
ENSMUSG00000073000	Gm10451	3.96095	1.26846	90.4074	2.66024e-05	0.000972723	13	13	18	196	281	253
ENSMUSG00000021747	4930452B06Rik	3.95917	0.525246	42.3725	0.000307271	0.00388499	6	9	11	101	95	235
ENSMUSG00000031775	Pllp	3.95346	3.09689	184.84	2.3492e-06	0.000342828	40	67	55	855	1052	726
ENSMUSG00000047730	Fcgbp	3.94556	7.12713	110.842	1.34383e-05	0.000690623	479	1455	788	14504	16530	12204
ENSMUSG00000074715	Ccl28	3.93891	3.7725	56.9072	0.000121054	0.00226588	45	123	95	1276	735	2203
ENSMUSG00000026579	F5	3.93036	3.79458	280.493	5.53652e-07	0.000259529	85	108	75	1896	1212	1207
ENSMUSG00000027356	Fermt1	3.92775	5.99027	121.702	9.79915e-06	0.000602961	211	612	419	6593	7333	5717
NA	Gpr30	3.92014	3.45488	119.522	1.04177e-05	0.000617439	58	111	47	1318	1281	791
ENSMUSG00000050854	Tmem125	3.91739	1.443	46.8189	0.000224986	0.00327096	8	16	27	342	316	174
ENSMUSG00000020679	Hnf1b	3.90689	4.22495	224.578	1.19875e-06	0.000278894	79	146	140	2089	1857	1832
NA	Dlx6as1	3.90569	2.90251	91.1964	2.58434e-05	0.00096797	25	72	50	718	927	648
ENSMUSG00000044313	Mab21l3	3.90383	6.33402	93.3351	2.39209e-05	0.000934427	273	912	435	8034	9609	7237
NA	BC021891	3.89456	4.32129	143.218	5.63425e-06	0.00047888	75	144	172	2190	2014	1967
ENSMUSG00000075217	4833423E24Rik	3.89351	7.59563	81.8933	3.69408e-05	0.00117098	605	2266	1050	19616	20516	19561
ENSMUSG00000072849	Serpina1e	3.89224	3.48413	42.7848	0.000298166	0.0038326	21	104	96	926	1572	925
ENSMUSG00000003309	Ap1m2	3.88101	3.92652	43.9139	0.00027494	0.00367911	34	212	67	1580	1575	1528
ENSMUSG00000032091	Tmprss4	3.88029	1.80667	61.9959	9.18633e-05	0.00189978	13	39	18	390	440	239
ENSMUSG00000042064	Myo3b	3.87622	6.03207	223.55	1.21795e-06	0.000278894	449	605	273	6209	7532	6395
ENSMUSG00000007908	Hmgcll1	3.87227	0.90826	73.1998	5.34659e-05	0.00140107	8	19	10	194	204	169
ENSMUSG00000071551	Akr1c19	3.87081	3.48265	51.5917	0.000165559	0.00274815	34	52	131	1122	1217	1094
ENSMUSG00000039676	Capsl	3.86793	2.18173	113.329	1.24694e-05	0.000660577	20	36	34	387	452	543
ENSMUSG00000035498	Cdcp1	3.86141	4.92316	105.426	1.59069e-05	0.000746377	110	350	165	3388	3021	2956
ENSMUSG00000055415	Atp10b	3.83776	4.75125	39.1746	0.000391545	0.00456773	83	409	84	2361	3093	2800
ENSMUSG00000029032	Arhgef16	3.83609	4.22246	334.076	3.00785e-07	0.000228538	94	159	130	2030	1909	1807
ENSMUSG00000025150	Cbr2	3.82605	6.5765	57.8813	0.000114633	0.00219192	697	968	345	14153	11172	4343
ENSMUSG00000045314	Sowahb	3.82094	4.40499	120.506	1.01326e-05	0.000611646	102	239	106	2880	1751	1933
NA	Mfi2	3.81547	3.66333	110.18	1.37124e-05	0.000694403	89	79	92	878	1862	1111
ENSMUSG00000000303	Cdh1	3.81353	7.59262	167.178	3.31826e-06	0.000410641	854	1962	1252	20723	22505	16191
ENSMUSG00000030093	Wnt7a	3.81072	5.25155	79.1387	4.13621e-05	0.00124411	133	414	258	3445	5276	2941
ENSMUSG00000014725	Adam28	3.81048	3.73544	81.5939	3.73911e-05	0.00117801	52	75	144	1469	1392	1231
ENSMUSG00000055373	Fut9	3.80969	5.2306	126.56	8.58171e-06	0.000577176	158	271	346	3149	4195	4141
ENSMUSG00000040471	Ggt6	3.80802	1.97814	77.0521	4.5171e-05	0.00130121	36	18	26	394	509	295
ENSMUSG00000031438	Rnf128	3.80343	6.94997	54.2645	0.000140956	0.00249195	430	1756	505	15158	12661	10374
ENSMUSG00000038605	Samd10	3.79996	2.9329	200.871	1.76333e-06	0.000306482	63	46	49	777	844	714
ENSMUSG00000074653	Lrrc31	3.79514	3.41798	87.7993	2.93236e-05	0.00102048	39	87	97	846	1126	1284
ENSMUSG00000020140	Lgr5	3.79423	5.17508	70.1077	6.1583e-05	0.00152912	101	382	285	3615	4383	3084
ENSMUSG00000075611	Gm11545	3.79037	3.16495	123.79	9.25034e-06	0.000593749	64	80	46	1051	1125	576
ENSMUSG00000062444	Ap3b2	3.78836	5.43847	67.458	6.98356e-05	0.00164052	135	290	476	4257	4890	4150
ENSMUSG00000024479	Mal2	3.78438	3.64459	120.165	1.023e-05	0.000613154	92	101	72	908	1837	1054
ENSMUSG00000062794	Zfp599	3.7789	2.71799	230.717	1.09177e-06	0.000278894	39	54	46	654	657	697
ENSMUSG00000040728	Esrp1	3.7788	5.3886	154.315	4.36601e-06	0.000440504	175	450	278	4480	4429	3961
ENSMUSG00000056648	Hoxb8	3.77503	5.29404	173.968	2.8941e-06	0.000374469	176	380	286	4174	4606	3264
ENSMUSG00000034127	Tspan8	3.77083	5.20362	60.2464	0.000100763	0.00202956	182	515	120	3973	4204	3139
ENSMUSG00000010154	Spire2	3.77062	2.74214	122.223	9.65863e-06	0.000602904	40	47	54	504	860	664
ENSMUSG00000059854	Hydin	3.76864	0.944253	57.1267	0.000119568	0.00225012	11	23	7	199	209	171
ENSMUSG00000040808	S100g	3.76734	4.86009	43.6835	0.000279487	0.00370509	104	435	108	3746	3224	1989
ENSMUSG00000005251	Ripk4	3.76679	3.75933	110.567	1.35516e-05	0.000694136	62	108	118	1945	1270	971
ENSMUSG00000009545	Kcnq1	3.76415	4.62786	66.8765	7.18333e-05	0.00164611	68	223	238	2408	2844	2314
ENSMUSG00000020805	Slc13a5	3.76337	3.24554	190.367	2.12239e-06	0.000334815	70	89	46	922	1091	882
ENSMUSG00000041193	Pla2g5	3.76171	3.44471	204.779	1.64976e-06	0.000300237	57	105	73	1028	1239	1056
ENSMUSG00000019312	Grb7	3.75545	5.38681	115.019	1.18616e-05	0.000646084	159	452	303	3988	4853	3960
ENSMUSG00000030209	Grin2b	3.75543	4.42733	129.163	8.00848e-06	0.000563106	227	124	110	1927	2184	2460
ENSMUSG00000021187	Tc2n	3.75121	3.50612	433.429	1.20797e-07	0.000228538	76	91	78	1213	1097	1168
NA	1810007I06Rik	3.75063	0.845046	42.5422	0.00030348	0.0038543	6	18	14	143	130	264
ENSMUSG00000032500	Dclk3	3.7467	4.2722	116.342	1.14123e-05	0.000636003	112	233	84	1861	2226	1818
ENSMUSG00000058952	Cfi	3.74476	2.02077	52.6436	0.000155266	0.00266572	18	20	47	358	355	516
ENSMUSG00000034607	Pof1b	3.74416	2.83845	58.3392	0.000111765	0.00216112	27	97	35	972	619	609
ENSMUSG00000081683	Fzd10	3.74005	5.5552	88.0952	2.89976e-05	0.00101611	168	500	367	4009	6036	4292
ENSMUSG00000047040	Prr15l	3.73844	3.55336	282.065	5.42972e-07	0.000259529	70	96	89	1418	994	1193
NA	2310046K01Rik	3.72578	3.58541	206.837	1.59373e-06	0.000300151	86	123	58	1248	1236	1184
ENSMUSG00000084128	Esrp2	3.71893	3.72847	409.104	1.47942e-07	0.000228538	91	101	99	1554	1282	1227
ENSMUSG00000026227	2810459M11Rik	3.70568	2.42211	74.31	5.08882e-05	0.00137381	19	62	39	640	475	521
ENSMUSG00000036832	Lpar3	3.69287	3.72201	51.1393	0.000170253	0.00278693	55	195	56	1235	1744	1035
ENSMUSG00000026976	Pax8	3.69017	5.69853	76.4492	4.63544e-05	0.00132386	166	455	541	5571	5224	5098
ENSMUSG00000026961	Lrrc26	3.68086	2.13825	42.444	0.000305666	0.00387252	18	66	18	473	550	312
ENSMUSG00000021000	Mia2	3.67172	0.726399	54.4592	0.000139354	0.00247493	13	17	7	163	212	118
ENSMUSG00000038721	Hoxb7	3.67081	4.44876	105.593	1.58226e-05	0.000746377	187	241	79	2076	2390	2184
ENSMUSG00000018569	Cldn7	3.66857	5.07515	151.792	4.61937e-06	0.000443833	165	371	242	4143	3566	2629
NA	Tmem20	3.66395	3.07435	38.0147	0.000429343	0.00486145	82	100	15	918	940	707
ENSMUSG00000042367	Gjb3	3.64582	1.46593	51.226	0.00016934	0.00278081	20	32	12	172	376	275
ENSMUSG00000020905	Usp43	3.64268	2.17713	92.3705	2.47645e-05	0.000950574	33	47	25	663	380	340
ENSMUSG00000000402	Egfl6	3.63321	4.41056	133.86	7.0928e-06	0.000535212	110	200	186	2230	1531	2725
ENSMUSG00000053559	Smagp	3.63019	3.68415	92.0319	2.50696e-05	0.00095283	78	76	140	1626	1388	915
ENSMUSG00000028699	Tspan1	3.6294	3.45903	63.11	8.6716e-05	0.00185022	43	147	72	1453	1166	746
ENSMUSG00000044393	Dsg2	3.62717	5.79285	503.401	7.13863e-08	0.000228538	368	476	453	6098	5999	4824
ENSMUSG00000031995	St14	3.62627	6.48942	158.786	3.95926e-06	0.000425837	435	1013	684	9029	10350	7984
ENSMUSG00000021263	Degs2	3.61902	2.34877	158.409	3.99162e-06	0.000425837	40	51	29	505	498	537
ENSMUSG00000070780	Rbm47	3.61298	5.70391	374.415	2.01832e-07	0.000228538	371	427	430	6771	4853	4355
ENSMUSG00000040525	Cblc	3.61294	2.797	135.161	6.86332e-06	0.000529567	40	55	67	698	790	616
ENSMUSG00000032226	Gcnt3	3.61176	4.97695	88.9534	2.80775e-05	0.000998461	128	332	288	2989	4062	2508
ENSMUSG00000038843	Gcnt1	3.60406	5.40861	493.879	7.63463e-08	0.000228538	280	397	335	4806	4417	3735
ENSMUSG00000041012	Cmtm8	3.60141	3.53232	39.5631	0.000379843	0.00446828	27	103	142	1052	1385	1063
ENSMUSG00000017723	Wfdc2	3.59876	7.09747	95.3734	2.2256e-05	0.00089423	645	1832	870	12829	16712	12037
ENSMUSG00000047990	C2cd4a	3.59513	3.49726	82.0941	3.66427e-05	0.00116631	56	101	111	1037	1586	790
ENSMUSG00000015970	Chdh	3.5881	8.02785	89.4213	2.75917e-05	0.000990291	1078	3419	1904	25806	29688	23829
ENSMUSG00000034917	Tjp3	3.58356	5.11386	325.701	3.28694e-07	0.000228538	247	291	293	4049	3808	2700
ENSMUSG00000026971	Itgb6	3.57937	3.41551	85.1837	3.24215e-05	0.00107779	80	138	45	1366	1063	825
ENSMUSG00000074802	Gas2l3	3.57532	6.13717	160.698	3.80011e-06	0.000419773	368	642	689	8101	7745	5606
NA	1600029D21Rik	3.56983	6.39401	49.5018	0.000188742	0.00297384	259	897	891	8784	5629	11189
ENSMUSG00000057719	Sh3rf2	3.56701	3.66518	229.064	1.11933e-06	0.000278894	112	94	100	1586	1270	1009
ENSMUSG00000024500	Ppp2r2b	3.56284	5.50215	123.067	9.43584e-06	0.000602904	210	564	349	5292	3906	4620
ENSMUSG00000028572	Hook1	3.55666	5.41081	237.912	9.81463e-07	0.000278647	278	402	363	3503	4109	5244
ENSMUSG00000028222	Calb1	3.55452	7.42748	52.0145	0.00016132	0.00271992	792	2791	809	22733	16405	13527
ENSMUSG00000027684	Mecom	3.54839	6.80799	133.998	7.06809e-06	0.000535212	552	1333	910	11548	13102	9357
ENSMUSG00000042684	Npl	3.53772	3.59599	175.53	2.80654e-06	0.000367918	115	123	64	1441	1036	1198
ENSMUSG00000041886	Macc1	3.53557	3.25461	160.237	3.83771e-06	0.000419773	63	97	77	995	1168	721
NA	9930023K05Rik	3.53446	7.99471	88.8304	2.82071e-05	0.00100077	1099	2200	2979	26360	26761	24283
ENSMUSG00000024331	Dsc2	3.53268	3.97871	201.496	1.74451e-06	0.000306482	171	130	91	1618	1560	1595
ENSMUSG00000001672	Marveld3	3.52907	3.19982	78.9344	4.17164e-05	0.00124655	36	95	97	946	948	882
ENSMUSG00000027562	Car2	3.52854	5.40872	121.412	9.8787e-06	0.000602961	204	554	320	4439	4537	3905
ENSMUSG00000028337	Coro2a	3.52782	5.93484	81.9618	3.68387e-05	0.00117014	643	260	588	5628	6423	6447
ENSMUSG00000021509	Slc25a48	3.52141	7.27821	85.7926	3.16643e-05	0.00106481	788	2327	895	17195	15733	14230
ENSMUSG00000041782	Lad1	3.51232	5.60734	343.601	2.72621e-07	0.000228538	330	495	408	5052	5594	4117
ENSMUSG00000020173	Cobl	3.51093	6.40152	214.62	1.4026e-06	0.000290108	515	925	708	10151	9058	6504
ENSMUSG00000016024	Lbp	3.50398	6.85344	161.855	3.7078e-06	0.000419259	621	1186	1127	10569	13398	10949
ENSMUSG00000038578	Susd1	3.49376	5.13937	169.323	3.1761e-06	0.000397903	221	271	395	3725	3618	3325
ENSMUSG00000045318	Adra2c	3.49226	4.02424	61.5684	9.3942e-05	0.00193051	63	164	186	1663	2071	1176
ENSMUSG00000051669	AU021092	3.48349	4.25779	48.8365	0.000196988	0.00304268	56	238	200	1651	2247	1855
ENSMUSG00000001583	Tnk1	3.4834	3.45463	152.635	4.53267e-06	0.000443771	86	79	112	1365	1089	869
ENSMUSG00000034177	Rnf43	3.47292	5.89367	254.153	7.80312e-07	0.00027327	390	520	616	6950	5280	5809
ENSMUSG00000047139	Cd24a	3.46739	7.48879	121.308	9.90747e-06	0.000602961	1275	2328	1147	18807	22949	12524
ENSMUSG00000020682	Mmp28	3.45871	1.25501	44.0702	0.000271912	0.0036616	16	16	28	147	228	328
ENSMUSG00000047501	Cldn4	3.45608	4.93809	61.7755	9.29274e-05	0.00191411	243	312	248	5588	2173	1674
ENSMUSG00000029370	Rassf6	3.44471	1.24618	67.5438	6.95469e-05	0.00164052	13	31	18	220	249	234
ENSMUSG00000070348	Ccnd1	3.44412	6.46519	375.703	1.99419e-07	0.000228538	605	899	824	9100	9584	7981
ENSMUSG00000004988	Fxyd4	3.44169	4.63289	178.632	2.64239e-06	0.000356715	179	332	155	2757	2443	2296
ENSMUSG00000027315	Spint1	3.4406	4.51467	147.879	5.0507e-06	0.000463502	145	185	265	2523	2387	1991
ENSMUSG00000027359	Slc27a2	3.43624	2.61058	111.397	1.3214e-05	0.000685929	44	72	46	469	606	746
ENSMUSG00000029055	Plch2	3.43577	3.70426	120.04	1.02661e-05	0.000613154	91	180	80	1542	1359	1036
ENSMUSG00000043230	Fam124b	3.43418	2.15315	102.079	1.77272e-05	0.000804171	32	47	38	346	554	422
ENSMUSG00000041794	Myrip	3.42881	4.60682	186.241	2.28889e-06	0.000337207	248	274	133	2413	2310	2613
ENSMUSG00000044317	Gpr4	3.42711	2.51703	66.8405	7.19593e-05	0.00164611	58	72	24	754	467	507
ENSMUSG00000026380	Tfcp2l1	3.42463	7.72333	144.159	5.50975e-06	0.000470886	1233	2565	1889	17639	25230	20538
ENSMUSG00000046733	Gprc5a	3.42413	2.79003	165.008	3.47043e-06	0.000416156	53	67	63	889	592	607
ENSMUSG00000010080	Epn3	3.42085	4.09585	207.182	1.58457e-06	0.000300151	117	210	134	1669	1948	1520
ENSMUSG00000018849	Wwc1	3.41556	6.61738	256.855	7.52147e-07	0.00027327	618	1142	890	9479	10325	9739
ENSMUSG00000034159	2310007B03Rik	3.41079	2.36373	48.3213	0.000203691	0.00309215	26	48	62	703	567	281
ENSMUSG00000046352	Gjb2	3.41031	3.09867	124.305	9.12106e-06	0.000593749	80	93	58	1073	937	573
ENSMUSG00000039092	Sptlc3	3.40837	3.3067	80.6055	3.89283e-05	0.00119339	44	115	107	1090	1041	844
ENSMUSG00000009378	Slc16a12	3.40522	3.63924	220.688	1.27355e-06	0.000281436	94	118	122	1128	1433	1169
ENSMUSG00000029189	Sel1l3	3.4013	4.3436	306.609	4.05897e-07	0.000232726	140	229	182	2124	2070	1913
ENSMUSG00000098132	Rassf10	3.39602	4.12426	57.8216	0.000115014	0.00219641	144	82	233	1783	2094	1358
ENSMUSG00000112129	Pbld1	3.39397	2.61353	62.4472	8.97322e-05	0.00187209	36	44	82	523	562	739
ENSMUSG00000040584	Abcb1a	3.39242	5.61475	223.239	1.22385e-06	0.000278894	374	515	446	3721	5618	5303
ENSMUSG00000034532	Fbxo16	3.3918	1.38473	87.1534	3.00521e-05	0.00103536	25	19	25	279	270	226
ENSMUSG00000074272	Ceacam1	3.38187	4.25491	87.613	2.95314e-05	0.00102197	152	181	187	2743	2034	1010
ENSMUSG00000022900	Ildr1	3.38142	3.89776	181.649	2.49438e-06	0.000346506	94	165	149	1372	1597	1492
ENSMUSG00000090925	1810064F22Rik	3.37807	0.411482	42.0982	0.000313526	0.00393983	10	20	6	128	132	128
ENSMUSG00000035681	Kcnc2	3.37717	1.76708	66.508	7.3137e-05	0.00166276	29	25	37	234	355	415
ENSMUSG00000030739	Myh14	3.37422	6.72836	257.655	7.44059e-07	0.00027327	974	1288	695	11969	11342	8639
ENSMUSG00000053279	Aldh1a1	3.37337	6.38546	124.893	8.97641e-06	0.000593402	973	903	450	7640	7116	10323
ENSMUSG00000026639	Lamb3	3.35757	4.55585	145.713	5.31179e-06	0.000466864	184	277	197	1796	3113	2095
ENSMUSG00000054889	Dsp	3.35723	8.60288	317.89	3.57786e-07	0.000229673	3025	4894	3033	41170	40737	34973
ENSMUSG00000041737	Tmem45b	3.35424	3.69248	48.7735	0.000197793	0.0030505	51	206	110	1441	1543	894
ENSMUSG00000028392	Bspry	3.34847	4.79406	138.52	6.31284e-06	0.000505976	157	304	313	3189	2556	2601
NA	Spnb3	3.34816	6.20517	62.8121	8.80554e-05	0.00186501	294	840	925	7005	8329	6760
ENSMUSG00000019590	Cyb561	3.34609	3.83125	186.33	2.28513e-06	0.000337207	93	172	135	1555	1216	1500
ENSMUSG00000029596	Sdsl	3.34193	0.202073	53.1453	0.000150646	0.00260957	7	13	11	121	100	113
ENSMUSG00000053182	Gm609	3.34086	2.72823	74.5081	5.04452e-05	0.00136813	37	82	67	815	730	441
ENSMUSG00000063531	Sema3e	3.33846	5.12299	144.715	5.43784e-06	0.000467322	207	470	315	3689	3793	2970
ENSMUSG00000015709	Arnt2	3.33246	6.03115	322.619	3.398e-07	0.000228538	737	611	499	6031	7173	6349
ENSMUSG00000001247	Lsr	3.33101	5.46775	252.675	7.96292e-07	0.00027327	357	546	360	5698	4087	3565
ENSMUSG00000017639	Rab11fip4	3.3288	4.84192	120.403	1.01618e-05	0.000611646	204	243	354	2634	3514	2413
ENSMUSG00000063704	Mapk15	3.32774	2.45008	121.516	9.85011e-06	0.000602961	37	63	54	552	602	472
ENSMUSG00000029832	Nfe2l3	3.32756	4.82026	94.7331	2.27626e-05	0.000907512	155	258	377	2917	2743	2803
ENSMUSG00000029188	Slc34a2	3.32755	3.40161	79.2031	4.12512e-05	0.00124411	52	114	131	1274	951	947
NA	Epb4.1l4a	3.32436	5.44664	466.028	9.36309e-08	0.000228538	364	458	416	4709	4666	3704
ENSMUSG00000097736	9530059O14Rik	3.32423	2.5318	51.2777	0.000168799	0.00277601	44	55	63	292	804	603
ENSMUSG00000032033	Barx2	3.32402	5.14803	116.786	1.12661e-05	0.000636003	224	461	331	3395	4550	2648
ENSMUSG00000003051	Elf3	3.32069	6.01858	87.7051	2.94285e-05	0.00102069	405	913	555	9433	5920	4275
ENSMUSG00000036687	Tmem184a	3.31927	3.43453	144.752	5.43316e-06	0.000467322	69	136	104	997	1032	1193
ENSMUSG00000049382	Krt8	3.31459	8.35459	86.4412	3.08824e-05	0.00104766	2288	4122	3026	51951	26256	21251
ENSMUSG00000032278	Paqr5	3.31206	2.04335	62.0135	9.1779e-05	0.00189978	29	62	28	375	535	309
ENSMUSG00000042429	Adora1	3.3071	3.49938	39.9124	0.000369702	0.00439917	38	109	172	1077	1176	1116
ENSMUSG00000007034	Slc44a4	3.29825	3.39114	135.564	6.79413e-06	0.000528133	93	147	67	1222	1021	897
ENSMUSG00000068740	Celsr2	3.29735	6.67961	644.205	2.99403e-08	0.000228538	982	1045	933	10707	11071	8902
ENSMUSG00000063060	Sox7	3.29215	4.21192	93.3774	2.38848e-05	0.000934427	94	241	204	2185	1777	1593
ENSMUSG00000056758	Hmga2	3.29202	4.55697	58.986	0.000107869	0.00212023	100	245	330	2414	2535	2081
ENSMUSG00000004231	Pax2	3.29069	5.61312	54.5173	0.000138879	0.00247148	187	564	662	5368	4960	4330
ENSMUSG00000028841	Cnksr1	3.29056	3.56107	101.637	1.79872e-05	0.000808849	85	96	155	1301	1272	952
ENSMUSG00000037095	Lrg1	3.28902	2.12305	67.4309	6.99271e-05	0.00164052	49	27	47	396	530	361
ENSMUSG00000026822	Lcn2	3.28872	4.37818	53.6524	0.000146153	0.00255752	100	379	143	2504	1733	2004
ENSMUSG00000024892	Pcx	3.27528	6.67123	131.633	7.50927e-06	0.000549259	696	1488	851	11320	11565	7618
ENSMUSG00000018166	Erbb3	3.27258	5.60465	193.189	2.01737e-06	0.000334209	320	621	495	5092	5198	4246
ENSMUSG00000000385	Tmprss2	3.26772	4.86091	291.348	4.85027e-07	0.000255368	231	341	285	3272	3063	2355
ENSMUSG00000033998	Kcnk1	3.26201	5.77544	116.823	1.12543e-05	0.000636003	306	780	550	6156	5341	4892
ENSMUSG00000044938	Klhl31	3.25968	1.7011	39.8837	0.000370521	0.00440553	14	56	27	277	293	386
ENSMUSG00000070803	Cited4	3.25537	4.96412	272.372	6.13299e-07	0.000271061	339	279	301	2894	2776	3619
ENSMUSG00000038618	Rassf7	3.25449	3.72825	366.85	2.1679e-07	0.000228538	122	149	122	1285	1293	1362
ENSMUSG00000023043	Krt18	3.24248	8.2967	116.076	1.15007e-05	0.000636003	2426	3044	3850	43340	29271	21994
NA	5730559C18Rik	3.24059	3.28759	81.1697	3.80411e-05	0.00117927	60	144	91	1003	1191	705
ENSMUSG00000045725	Prr15	3.23655	4.07734	213.664	1.42443e-06	0.000290108	161	227	124	1972	1643	1425
ENSMUSG00000030302	Atp2b2	3.23234	7.37092	74.336	5.083e-05	0.00137381	882	1826	2240	16604	19705	12965
ENSMUSG00000029082	Bst1	3.2314	2.56632	43.5641	0.000281879	0.00370782	70	39	65	981	457	343
ENSMUSG00000052117	D630039A03Rik	3.22631	3.59392	130.716	7.68983e-06	0.000550757	92	116	152	1038	1223	1311
ENSMUSG00000022240	Ctnnd2	3.20994	3.74718	108.585	1.44028e-05	0.000714095	94	143	169	1103	1249	1615
ENSMUSG00000032092	Mpzl2	3.20783	4.50558	140.849	5.96406e-06	0.00048703	210	348	149	2542	2254	1969
ENSMUSG00000024354	Slc23a1	3.20712	4.28566	108.215	1.45693e-05	0.000715468	140	306	160	2307	2065	1442
ENSMUSG00000036585	Fgf1	3.20673	6.03386	49.5452	0.00018822	0.00297384	776	693	537	10359	2603	6826
ENSMUSG00000021696	Elovl7	3.20067	1.76216	71.6404	5.73758e-05	0.00147906	34	25	42	409	289	304
ENSMUSG00000020911	Krt19	3.20053	7.84521	236.796	9.97603e-07	0.000278647	1795	2764	2511	28607	20448	19727
ENSMUSG00000052302	Tbc1d30	3.1993	2.81283	100.342	1.87772e-05	0.000809304	73	52	86	813	672	600
ENSMUSG00000022865	Cxadr	3.19209	5.38393	228.185	1.13436e-06	0.000278894	374	611	323	4800	3878	3766
NA	LOC100862030	3.19074	2.23996	38.276	0.000420434	0.00479624	41	30	70	704	433	271
ENSMUSG00000047161	Chst9	3.18812	3.08271	99.8155	1.91113e-05	0.000816665	64	89	106	670	996	825
ENSMUSG00000041301	Cftr	3.17527	3.07498	42.8964	0.000295761	0.00381579	53	171	47	1019	784	700
ENSMUSG00000061132	Blnk	3.17392	4.11393	69.8649	6.22856e-05	0.00153423	223	128	181	2408	1755	1011
ENSMUSG00000051439	Cd14	3.17217	5.63199	41.6255	0.000324694	0.00402459	503	280	724	7842	4093	2981
ENSMUSG00000024987	Cyp26a1	3.17183	0.925952	44.97	0.000255275	0.00351948	12	24	22	130	219	199
ENSMUSG00000036225	Kctd1	3.16894	6.31585	154.976	4.30258e-06	0.000437872	572	1076	861	6553	9149	7808
ENSMUSG00000035000	Dpp4	3.16705	6.13468	251.358	8.10882e-07	0.00027327	703	852	656	9459	5499	6062
NA	Epb4.1l4b	3.16584	4.44776	206.536	1.60178e-06	0.000300151	165	296	227	2113	2332	2010
ENSMUSG00000034435	Tmem30b	3.16389	3.89484	101.083	1.832e-05	0.000809304	139	240	97	1524	1695	1182
ENSMUSG00000024644	Cndp2	3.16179	8.22188	146.337	5.23478e-06	0.000466864	2352	4376	2784	30229	35782	22475
ENSMUSG00000044921	Rassf9	3.15681	3.70117	116.042	1.15121e-05	0.000636003	98	125	181	1429	1262	1162
ENSMUSG00000030747	Dgat2	3.14413	6.64268	172.318	2.99046e-06	0.000379175	875	1491	857	10578	11511	7519
ENSMUSG00000041608	Entpd3	3.12761	2.10946	49.0412	0.000194402	0.00301929	43	28	63	561	404	309
ENSMUSG00000079620	Muc4	3.12665	4.26868	289.61	4.95251e-07	0.000255368	164	239	216	2122	1737	1847
ENSMUSG00000053025	Sv2b	3.12348	5.22522	37.7166	0.000439806	0.00493361	132	636	453	4562	3658	2891
ENSMUSG00000028115	Bnipl	3.11051	2.7701	109.354	1.40645e-05	0.000701818	83	61	74	615	803	580
ENSMUSG00000000296	Tpd52l1	3.11043	5.18872	129.331	7.97319e-06	0.000563106	249	569	380	3361	3870	3512
ENSMUSG00000050931	Sgms2	3.09696	5.53775	121.439	9.87121e-06	0.000602961	617	559	353	4357	3362	5976
ENSMUSG00000020990	Cdkl1	3.09677	5.72472	57.9581	0.000114145	0.0021916	265	751	719	5613	6145	3855
ENSMUSG00000090231	Cfb	3.09581	5.43477	86.7568	3.05109e-05	0.00104188	564	600	272	6045	3139	3707
ENSMUSG00000021795	Sftpd	3.08968	1.55429	38.9027	0.00040001	0.00463747	20	59	19	251	325	276
ENSMUSG00000044279	Crb3	3.08856	2.5685	52.3793	0.000157773	0.00269415	30	76	87	650	532	561
ENSMUSG00000020758	Itgb4	3.08538	6.65084	163.299	3.59661e-06	0.000419259	800	1201	1300	9641	11617	8323
NA	Mycl1	3.08303	4.06473	223.126	1.22599e-06	0.000278894	223	173	154	1654	1765	1502
ENSMUSG00000021636	Marveld2	3.08221	3.32113	65.0009	7.87962e-05	0.00172893	67	99	158	931	1148	850
ENSMUSG00000043088	Il17re	3.07694	4.47428	233.663	1.04477e-06	0.000278647	202	299	238	2448	2376	1731
ENSMUSG00000039813	Tbc1d2	3.07215	3.7193	51.7203	0.000164254	0.00274389	68	199	172	1556	1462	867
NA	Pvrl4	3.0714	3.71072	48.7525	0.000198061	0.0030516	67	167	198	1539	1440	882
ENSMUSG00000036834	Plch1	3.06659	2.84098	106.503	1.53724e-05	0.000736155	57	109	74	766	770	566
ENSMUSG00000086040	Wipf3	3.06521	4.2583	117.325	1.10922e-05	0.000636003	244	150	234	1873	2141	1605
ENSMUSG00000025329	Padi1	3.05551	4.6177	61.1712	9.59273e-05	0.00195683	130	453	257	2760	2309	2169
ENSMUSG00000025885	Myo5b	3.05508	6.51921	254.431	7.77356e-07	0.00027327	1030	957	1074	11616	8081	7471
ENSMUSG00000009394	Syn2	3.05235	2.29958	43.8866	0.000275474	0.00368306	45	54	64	713	226	516
ENSMUSG00000009376	Met	3.04895	5.18441	357.387	2.37561e-07	0.000228538	344	461	421	3479	3870	3323
NA	Gyltl1b	3.04692	4.20454	195.702	1.9294e-06	0.00032587	162	214	242	1881	1921	1611
ENSMUSG00000044628	Rnf208	3.04083	2.30783	109.882	1.38383e-05	0.000695016	44	75	49	507	508	430
ENSMUSG00000001249	Hpn	3.03003	4.1154	187.231	2.24747e-06	0.000337207	163	281	155	1884	1567	1642
ENSMUSG00000025504	Eps8l2	3.02085	5.03461	377.438	1.96225e-07	0.000228538	332	382	405	3570	3006	3058
ENSMUSG00000029669	Tspan12	3.01875	2.55617	53.7201	0.000145567	0.00255593	75	37	84	506	576	627
ENSMUSG00000033022	Cdo1	3.01512	4.76259	90.7083	2.63096e-05	0.000971526	265	509	184	3043	2437	2501
ENSMUSG00000044641	Pard6b	3.01475	4.77633	56.0773	0.000126893	0.00233124	240	335	364	4581	1874	1714
ENSMUSG00000000567	Sox9	3.0081	4.19921	77.0969	4.50846e-05	0.00130114	313	142	172	1896	1524	1963
ENSMUSG00000001420	Tmem79	3.00744	2.42318	77.6516	4.40323e-05	0.00128217	41	93	53	487	561	510
ENSMUSG00000014158	Trpv4	3.00651	3.96646	106.061	1.55889e-05	0.000739707	193	134	205	2024	1347	1236
ENSMUSG00000029228	Lnx1	3.00435	1.51749	45.8166	0.000240796	0.00343307	20	49	30	372	273	189
ENSMUSG00000031958	Ldhd	3.00194	3.89913	101.791	1.78958e-05	0.000808849	107	256	161	1398	1581	1376
ENSMUSG00000020782	Llgl2	3.00029	5.51716	284.211	5.28825e-07	0.000259529	508	619	471	5416	4634	3421
ENSMUSG00000038235	F11r	2.99571	5.99644	257.342	7.47206e-07	0.00027327	645	747	821	7764	5796	5239
ENSMUSG00000014791	Elmo3	2.985	4.25719	248.202	8.47278e-07	0.00027327	203	214	248	1940	1986	1662
ENSMUSG00000034382	AI661453	2.97967	5.68671	116.208	1.14566e-05	0.000636003	402	738	676	6418	5007	3729
ENSMUSG00000040653	Ppp1r14c	2.97631	1.92362	45.6962	0.000242791	0.00344807	37	48	47	324	552	217
ENSMUSG00000016028	Celsr1	2.96181	7.07135	165.909	3.40619e-06	0.000415178	1107	1838	1837	14564	13728	11078
ENSMUSG00000032373	Car12	2.96161	2.89608	112.95	1.26112e-05	0.000665812	66	119	81	803	773	592
ENSMUSG00000015966	Il17rb	2.96082	5.86251	104.316	1.6483e-05	0.000761122	476	1050	582	7403	4475	5241
ENSMUSG00000064023	Klk8	2.95759	1.45233	42.0622	0.000314358	0.00394708	18	32	45	263	307	217
ENSMUSG00000005148	Klf5	2.9564	6.17658	157.608	4.06156e-06	0.000427403	582	992	1005	6853	7635	6600
ENSMUSG00000072572	Slc39a2	2.95366	2.04676	50.1048	0.000181648	0.0029028	40	54	52	454	527	216
ENSMUSG00000002324	Rec8	2.95274	2.56174	87.77	2.93563e-05	0.00102048	51	97	64	678	600	441
ENSMUSG00000048329	Mfsd6l	2.9505	0.639527	37.5655	0.000445235	0.00498173	10	21	23	149	167	127
ENSMUSG00000019982	Myb	2.94631	3.87567	156.344	4.17505e-06	0.000430593	123	212	192	1439	1504	1328
ENSMUSG00000033948	Zswim5	2.94126	1.94374	49.1139	0.000193495	0.00301514	25	49	62	414	392	307
ENSMUSG00000051397	Tacstd2	2.93265	5.00027	50.3105	0.000179306	0.00288625	205	511	448	4365	3190	1849
ENSMUSG00000026090	2010300C02Rik	2.9326	4.3435	173.36	2.92913e-06	0.000374469	243	273	220	2721	1658	1582
ENSMUSG00000039450	Dcxr	2.9289	4.77868	131.276	7.57898e-06	0.000550419	227	406	365	2481	2316	3179
ENSMUSG00000032482	Cspg5	2.92796	3.7809	73.1546	5.35744e-05	0.00140107	142	138	211	1009	1767	1189
ENSMUSG00000044433	Camsap3	2.91888	4.59591	377.913	1.95363e-07	0.000228538	295	284	299	2467	2195	2376
ENSMUSG00000021367	Edn1	2.91759	4.20848	75.7591	4.77584e-05	0.00134517	272	252	155	2753	1374	1315
ENSMUSG00000027737	Slc7a11	2.91416	4.85879	37.5855	0.000444512	0.00497912	128	502	439	3677	2447	2373
ENSMUSG00000047250	Ptgs1	2.91293	5.39133	160.919	3.78227e-06	0.000419773	446	443	630	4881	3613	3768
ENSMUSG00000042514	Klhl14	2.90323	2.82414	114.411	1.20758e-05	0.000648613	69	94	96	637	789	617
ENSMUSG00000019851	Perp	2.90181	4.8574	165.874	3.4086e-06	0.000415178	328	329	403	3583	2688	2200
ENSMUSG00000000690	Hoxb6	2.89139	4.95284	75.388	4.8536e-05	0.0013476	224	387	527	2899	3320	2754
ENSMUSG00000020607	Fam84a	2.88951	5.9934	69.8725	6.22633e-05	0.00153423	401	1157	839	7492	5407	5693
NA	Ptplad2	2.88306	3.80293	49.0985	0.000193686	0.00301514	210	106	194	2052	1112	927
ENSMUSG00000021950	Anxa8	2.88187	3.30072	43.6408	0.000280339	0.00370782	161	139	70	1392	509	983
ENSMUSG00000034161	Scx	2.87742	3.89241	110.875	1.34249e-05	0.000690623	201	191	163	1006	1771	1486
ENSMUSG00000027901	Dennd2d	2.87187	3.55388	134.836	6.9197e-06	0.000529567	111	148	178	1124	1158	1111
ENSMUSG00000034282	Evpl	2.86989	5.93798	267.494	6.53119e-07	0.00027327	722	760	814	7517	5245	5121
NA	Fam179a	2.85503	1.84721	44.9493	0.000255643	0.0035214	26	48	60	428	353	255
NA	Dnahc14	2.8529	4.67842	56.3307	0.000125072	0.00231152	180	298	480	3000	2258	2183
ENSMUSG00000032548	Slco2a1	2.84936	4.18441	124.05	9.18493e-06	0.000593749	205	203	276	1460	1736	2034
ENSMUSG00000054065	Pkp3	2.84873	3.42336	181.727	2.49072e-06	0.000346506	114	162	133	1014	1151	926
ENSMUSG00000023915	Tnfrsf21	2.82228	5.65996	190.442	2.11952e-06	0.000334815	744	632	578	5598	3584	5472
ENSMUSG00000025017	Pik3ap1	2.8211	6.00491	136.281	6.67318e-06	0.00052135	925	739	809	8303	5970	4410
ENSMUSG00000022237	Ankrd33b	2.81567	4.2238	206.493	1.60293e-06	0.000300151	248	238	237	2306	1594	1519
ENSMUSG00000044968	Napepld	2.81542	4.71925	146.527	5.21169e-06	0.000466864	292	428	311	2087	2262	3213
ENSMUSG00000042734	Ttc9	2.81014	2.12854	51.0711	0.000170976	0.00279285	72	41	54	475	498	280
ENSMUSG00000026304	Rab17	2.78817	2.07282	51.142	0.000170225	0.00278693	37	74	55	522	427	259
ENSMUSG00000020151	Ptprr	2.78478	4.35943	52.0608	0.000160864	0.00271992	141	431	255	1756	2471	1650
ENSMUSG00000031803	B3gnt3	2.78444	0.9916	59.2465	0.000106349	0.00209704	26	27	24	177	214	169
ENSMUSG00000044037	Als2cl	2.78285	5.93378	201.157	1.75468e-06	0.000306482	671	787	949	6439	6170	5008
ENSMUSG00000030353	Tead4	2.77721	1.7878	74.6494	5.01323e-05	0.00136772	34	61	42	331	334	317
ENSMUSG00000023039	Krt7	2.77621	5.536	94.5328	2.29241e-05	0.000909263	611	545	675	6568	3784	3138
ENSMUSG00000060716	Plekhh1	2.77503	4.72185	131.005	7.63239e-06	0.000550757	338	271	426	2503	2431	2642
ENSMUSG00000029381	Shroom3	2.77206	6.40868	306.374	4.06986e-07	0.000232726	1230	1071	1078	9668	7982	6874
ENSMUSG00000068876	Cgn	2.77089	6.26512	140.725	5.98201e-06	0.00048703	833	953	1257	8990	7253	5971
ENSMUSG00000022132	Cldn10	2.76803	5.07837	45.3795	0.000248136	0.00347054	235	825	333	2970	3162	3550
ENSMUSG00000034171	Faah	2.76682	4.2567	278.085	5.70534e-07	0.000259576	278	252	233	1997	1894	1602
ENSMUSG00000051515	Fam181b	2.76542	2.90633	67.3366	7.02466e-05	0.00164052	66	111	121	560	800	771
ENSMUSG00000040447	Spns2	2.76403	4.7971	127.538	8.36032e-06	0.000569717	374	356	379	3397	2836	1793
ENSMUSG00000038781	Stap2	2.75731	3.29964	137.74	6.43543e-06	0.000507907	126	134	134	1171	939	722
ENSMUSG00000020865	Abcc3	2.75619	5.0757	62.8065	8.80807e-05	0.00186501	625	276	436	4171	2741	2830
ENSMUSG00000042195	Slc35f2	2.75543	1.89787	63.3305	8.57415e-05	0.00183703	37	67	46	383	409	268
NA	Aim1	2.7532	5.51038	147.031	5.1509e-06	0.000465961	474	617	737	5230	4334	3569
ENSMUSG00000026994	Galnt3	2.75266	2.36256	64.5268	8.06917e-05	0.00175806	48	107	55	483	530	451
ENSMUSG00000034755	Pcdh11x	2.75262	2.54477	54.9312	0.000135563	0.00242851	85	87	63	849	338	499
ENSMUSG00000030268	Bcat1	2.74365	6.84063	69.1979	6.42684e-05	0.00156809	1138	2637	1014	13310	10520	9200
NA	Fam46b	2.74307	3.93225	44.9329	0.000255935	0.00352229	127	287	211	2363	1107	964
ENSMUSG00000027938	Creb3l4	2.7305	1.75133	74.8583	4.9674e-05	0.0013621	50	53	34	291	338	322
ENSMUSG00000039062	Anpep	2.71738	10.0526	157.706	4.05294e-06	0.000427403	10673	19707	13926	107611	104813	91814
ENSMUSG00000053886	Sh2d4a	2.71531	3.89294	43.4228	0.000284747	0.00372439	86	275	254	1428	1505	1305
ENSMUSG00000022629	Kif21a	2.71463	5.1795	88.0024	2.90993e-05	0.00101611	348	809	375	3521	3606	3231
ENSMUSG00000056973	Ces1d	2.71332	5.70543	64.3271	8.15078e-05	0.00177085	1084	689	394	4759	5007	5130
ENSMUSG00000031538	Plat	2.70463	8.11082	394.47	1.68102e-07	0.000228538	3620	4582	3371	24804	26310	27760
ENSMUSG00000044244	Il20rb	2.70102	3.6426	156.341	4.17538e-06	0.000430593	136	203	181	1176	1051	1330
ENSMUSG00000022297	Fzd6	2.7	6.07448	246.676	8.65617e-07	0.00027327	795	1012	999	6374	7321	5530
ENSMUSG00000021553	Slc28a3	2.69758	2.9414	83.1993	3.5056e-05	0.00112647	75	123	121	907	706	582
ENSMUSG00000079445	B3gnt7	2.69235	3.07471	78.0703	4.32586e-05	0.00126736	106	153	96	1145	689	585
ENSMUSG00000024511	Rab27b	2.6909	2.69754	124.002	9.19696e-06	0.000593749	80	104	87	713	510	625
ENSMUSG00000040938	Slc16a11	2.68919	1.40533	47.71	0.000212031	0.00314511	46	26	36	245	276	223
ENSMUSG00000074227	Spint2	2.68077	7.0971	329.132	3.16875e-07	0.000228538	2007	1778	1957	13183	13748	12098
NA	Ccdc64b	2.67972	1.75602	51.3751	0.000167786	0.00276999	38	41	60	408	295	255
ENSMUSG00000024727	Trpm6	2.67478	3.35737	92.9341	2.42671e-05	0.000936128	101	159	171	852	1049	999
ENSMUSG00000018727	Cpsf4l	2.67458	1.34775	40.2284	0.000360825	0.00433018	33	39	34	264	314	137
ENSMUSG00000010529	Gm266	2.67215	3.45729	92.9974	2.4212e-05	0.000936128	124	207	138	1048	1292	776
ENSMUSG00000078942	Naip6	2.65944	4.25048	93.1938	2.40422e-05	0.000934445	282	263	264	2380	1933	1131
ENSMUSG00000032849	Abcc4	2.65587	6.76167	122.196	9.66579e-06	0.000602904	1685	1850	1153	8780	8554	13432
ENSMUSG00000020297	Nsg2	2.64566	4.89555	60.9001	9.73139e-05	0.00197035	328	708	279	2487	3474	2457
ENSMUSG00000028555	Ttc39a	2.64238	2.38653	71.6067	5.74643e-05	0.00147906	64	104	59	628	472	384
ENSMUSG00000030769	Slc5a11	2.64014	4.29189	77.6324	4.40681e-05	0.00128217	253	220	359	2218	2000	1358
ENSMUSG00000032261	Sh3bgrl2	2.6368	4.44271	113.471	1.24168e-05	0.000660053	374	386	192	2176	2080	1916
NA	D4Bwg0951e	2.63591	3.71463	62.7186	8.84814e-05	0.00186728	272	142	149	1273	1457	986
ENSMUSG00000045629	Sh3tc2	2.63268	2.82195	44.7336	0.000259517	0.00355118	113	136	61	940	669	406
ENSMUSG00000057766	Ankrd29	2.62391	3.42404	54.8577	0.000136144	0.0024347	186	115	160	807	1395	812
ENSMUSG00000052221	Ppp1r36	2.61908	2.18141	98.4737	1.99976e-05	0.000833809	56	75	66	456	391	430
ENSMUSG00000057967	Fgf18	2.61856	3.06654	91.2905	2.57547e-05	0.000966989	152	111	101	882	866	621
ENSMUSG00000031790	Mmp15	2.60949	5.70002	103.379	1.69897e-05	0.000779864	584	934	780	4408	6425	3826
ENSMUSG00000047496	Rnf152	2.60862	3.36265	53.8787	0.000144204	0.00253775	108	165	177	1164	1175	574
ENSMUSG00000026303	Mlph	2.59501	4.67995	156.373	4.17245e-06	0.000430593	464	417	263	2590	2340	2321
ENSMUSG00000001300	Efnb2	2.5891	7.69576	145.765	5.30528e-06	0.000466864	2592	3765	2938	21159	23246	14255
NA	Gm1614	2.58085	5.11791	128.516	8.14621e-06	0.000565084	483	534	533	2598	4150	2990
ENSMUSG00000046079	Lrrc8d	2.58025	4.43335	70.1405	6.1489e-05	0.00152912	354	234	364	2667	2044	1423
ENSMUSG00000032718	Mansc1	2.57316	3.52074	188.309	2.20341e-06	0.000337207	185	186	145	1224	1066	948
ENSMUSG00000026479	Lamc2	2.5721	4.95335	150.209	4.78792e-06	0.000451612	566	413	408	2583	3169	2952
ENSMUSG00000028125	Abca4	2.56763	5.23591	56.6594	0.00012276	0.00228207	371	636	688	4270	4220	2171
ENSMUSG00000021728	Emb	2.56477	5.79753	234.265	1.03549e-06	0.000278647	781	1048	707	6191	5335	4212
ENSMUSG00000055717	Slain1	2.56318	3.83165	109.423	1.4035e-05	0.000701818	178	195	263	1459	1125	1429
ENSMUSG00000041957	Pkp2	2.55517	3.64348	105.232	1.60058e-05	0.000746935	211	202	155	1585	1070	884
ENSMUSG00000030711	Sult1a1	2.55042	3.45384	107.301	1.49912e-05	0.000727473	141	212	149	1371	845	884
ENSMUSG00000027429	Sec23b	2.55038	6.86155	105.088	1.60792e-05	0.000746935	1270	2728	1412	11259	11073	10419
ENSMUSG00000040570	Rundc3b	2.54289	2.54482	89.0768	2.79483e-05	0.000996157	76	116	76	672	489	479
ENSMUSG00000048485	Zbtb8b	2.54131	0.886898	51.5658	0.000165823	0.00274931	25	32	26	183	165	162
ENSMUSG00000031504	Rab20	2.54089	4.03081	163.046	3.61579e-06	0.000419259	216	276	256	1954	1341	1323
ENSMUSG00000041351	Rap1gap	2.5391	3.93082	65.8561	7.55189e-05	0.00169363	250	151	284	1675	1186	1436
ENSMUSG00000037989	Wnk2	2.53674	6.04402	163.953	3.54762e-06	0.000419259	1179	855	975	7262	5090	6275
ENSMUSG00000030340	Scnn1a	2.53484	4.37924	162.063	3.69154e-06	0.000419259	323	354	282	2575	1550	1762
ENSMUSG00000031762	Mt2	2.5281	4.67596	74.552	5.03478e-05	0.00136813	566	370	246	2407	2428	2335
ENSMUSG00000038775	Vill	2.52621	4.58084	49.0521	0.000194266	0.00301929	200	623	309	2246	2440	2023
ENSMUSG00000039304	Tnfsf10	2.51975	5.19949	165.047	3.46759e-06	0.000416156	473	784	471	3286	3765	3237
ENSMUSG00000022037	Clu	2.51227	5.62278	55.7506	0.00012929	0.00235293	897	995	441	6537	3103	4321
ENSMUSG00000041695	Kcnj2	2.5037	1.67243	52.0557	0.000160914	0.00271992	48	50	49	383	302	203
ENSMUSG00000025314	Ptprj	2.50083	6.91894	48.6508	0.00019937	0.00305907	2030	1339	2218	16942	10202	7151
ENSMUSG00000027843	Ptpn22	2.49856	5.13523	111.777	1.30632e-05	0.000680385	546	471	617	3306	3957	2562
ENSMUSG00000043668	Tox3	2.49097	4.15967	77.6178	4.40955e-05	0.00128217	219	243	369	1636	1902	1447
NA	Gpr116	2.48551	5.53716	226.136	1.17038e-06	0.000278894	807	676	705	4149	4791	4017
NA	Mfsd4	2.47487	1.96255	62.4913	8.95277e-05	0.00187209	63	66	55	488	314	285
ENSMUSG00000051359	Ncald	2.47242	4.94734	251.127	8.1348e-07	0.00027327	563	488	420	2939	2973	2697
ENSMUSG00000018042	Cyb5r3	2.4346	8.8076	189.84	2.14278e-06	0.000334815	7455	8755	5846	43019	47241	34402
ENSMUSG00000021062	Rab15	2.42788	4.52588	75.7257	4.78276e-05	0.00134517	527	328	270	2264	2337	1798
ENSMUSG00000005667	Mthfd2	2.42625	2.93659	38.5747	0.000410536	0.00472513	151	132	92	764	382	978
ENSMUSG00000019734	Tmc4	2.42216	5.16734	161.424	3.74189e-06	0.000419444	453	632	675	3642	3316	3035
ENSMUSG00000003644	Rps6ka1	2.41693	5.48799	68.6702	6.58948e-05	0.0015981	617	753	832	5905	4057	2611
ENSMUSG00000005233	Spc25	2.41624	1.91156	40.905	0.000342716	0.00416311	87	52	44	303	396	331
ENSMUSG00000031488	Rab11fip1	2.41461	6.00965	116.093	1.14951e-05	0.000636003	1131	820	1188	6541	6341	5025
ENSMUSG00000038725	Pkhd1l1	2.41039	6.32181	39.8629	0.000371118	0.00440923	1745	784	1360	10553	6733	5124
ENSMUSG00000029053	Prkcz	2.40763	4.12699	198.367	1.8414e-06	0.000316495	314	271	276	1729	1667	1446
ENSMUSG00000006930	Hap1	2.40682	4.13869	80.6445	3.88661e-05	0.00119339	372	218	273	1918	1325	1654
ENSMUSG00000048148	Nwd1	2.40521	2.49122	92.8121	2.43736e-05	0.0009379	81	94	101	546	510	494
ENSMUSG00000037995	Igsf9	2.40042	3.92645	65.1558	7.81892e-05	0.0017212	222	188	332	1372	1572	1254
ENSMUSG00000019989	Enpp3	2.39866	6.01041	366.306	2.17919e-07	0.000228538	971	1270	988	5957	6351	5537
ENSMUSG00000027506	Tpd52	2.39682	5.4557	57.9285	0.000114333	0.0021916	636	524	986	4898	4186	3119
ENSMUSG00000025068	Gsto1	2.39241	6.95008	101.473	1.80849e-05	0.000809304	1464	2689	2081	14913	10185	9386
ENSMUSG00000041439	Mfsd6	2.39158	5.66771	137.96	6.40053e-06	0.000507742	770	763	986	5672	4558	3902
ENSMUSG00000020154	Ptprb	2.38838	5.22255	42.3079	0.00030873	0.0038904	722	395	719	2610	4654	2985
ENSMUSG00000033685	Ucp2	2.38836	7.75881	63.0551	8.69608e-05	0.00185122	3434	4196	3283	29310	19818	11464
ENSMUSG00000050105	Grrp1	2.38398	2.3731	57.9618	0.000114122	0.0021916	65	96	97	474	571	376
ENSMUSG00000021360	Gcnt2	2.38161	6.80078	339.789	2.83467e-07	0.000228538	1656	2361	1645	10715	9867	10273
ENSMUSG00000055044	Pdlim1	2.37139	5.65194	234.573	1.03079e-06	0.000278647	911	1019	638	4667	4753	4459
ENSMUSG00000043003	Rasef	2.36347	4.74658	62.9651	8.73642e-05	0.00185637	255	640	483	2565	2520	2319
ENSMUSG00000026126	Ptpn18	2.36327	4.22969	56.1877	0.000126095	0.00232619	322	341	291	2720	1419	1101
ENSMUSG00000051022	Hs3st1	2.36159	2.69408	38.418	0.000415691	0.00476342	158	68	97	686	498	598
ENSMUSG00000036718	Micall2	2.34846	3.27989	71.1211	5.87591e-05	0.00149978	173	189	137	1202	886	599
ENSMUSG00000033581	Igf2bp2	2.34472	5.17423	63.8419	8.3535e-05	0.00180475	472	510	844	3815	3430	2721
ENSMUSG00000025608	Podxl	2.34374	5.78889	51.8013	0.000163439	0.00274213	1031	644	1119	6767	3437	5145
ENSMUSG00000035439	Haus8	2.34366	4.76329	203.635	1.68201e-06	0.000302547	389	517	490	2874	2390	2231
ENSMUSG00000030088	Aldh1l1	2.3424	2.97111	56.641	0.000122889	0.00228207	138	108	151	570	672	896
ENSMUSG00000042724	Map3k9	2.33111	4.14659	46.3807	0.000231729	0.00335638	284	209	405	2050	1670	1168
ENSMUSG00000034684	Sema3f	2.32779	4.83625	73.871	5.18882e-05	0.00138502	598	346	517	3221	2315	2350
ENSMUSG00000026605	Cenpf	2.32714	4.67056	40.8992	0.000342867	0.00416311	641	246	412	2356	2166	2469
NA	5430407P10Rik	2.32026	4.20612	45.6591	0.000243409	0.00344807	453	291	217	2165	1819	1106
ENSMUSG00000024935	Slc1a1	2.31369	6.058	67.3697	7.01342e-05	0.00164052	1022	1694	837	6142	7735	4381
ENSMUSG00000025856	Pdgfa	2.30623	4.78573	81.7807	3.71093e-05	0.00117152	607	374	454	2706	2836	2019
ENSMUSG00000051000	Fam160a1	2.30407	3.4949	55.0158	0.000134897	0.00242642	204	142	236	1071	1218	791
ENSMUSG00000001763	Tspan33	2.30132	1.69841	41.7392	0.000321961	0.00399712	58	46	63	363	215	306
ENSMUSG00000102018	K230010J24Rik	2.29827	0.972861	41.8145	0.000320168	0.00398956	36	39	27	163	180	183
NA	8430419L09Rik	2.29614	6.00724	186.339	2.28472e-06	0.000337207	889	1361	1164	5764	6376	5450
ENSMUSG00000035473	Galm	2.29418	4.78662	57.7545	0.000115444	0.00219656	305	773	412	3022	2218	2345
ENSMUSG00000037541	Shank2	2.27878	5.84808	356.859	2.38794e-07	0.000228538	961	1125	994	5802	5360	4607
ENSMUSG00000027932	Slc27a3	2.27718	4.77037	80.9351	3.84068e-05	0.00118349	432	526	499	2217	3334	1867
ENSMUSG00000001334	Fndc5	2.27604	5.22196	78.2596	4.29146e-05	0.00126447	907	663	433	3354	3609	3217
ENSMUSG00000056220	Pla2g4a	2.27499	5.92701	119.695	1.03668e-05	0.000616786	1082	1385	827	6213	6289	4147
ENSMUSG00000037509	Arhgef4	2.27372	3.62709	67.8734	6.84519e-05	0.00163408	147	251	261	1291	1171	913
ENSMUSG00000048218	Amigo2	2.27159	4.91021	58.4956	0.000110807	0.00214841	435	605	572	1741	3016	3369
ENSMUSG00000022014	Epsti1	2.26973	4.30026	41.2608	0.00033366	0.00408661	441	220	377	2494	1568	1357
ENSMUSG00000007891	Ctsd	2.26967	9.34574	57.9428	0.000114242	0.0021916	10420	15818	9208	86141	55186	38236
ENSMUSG00000031924	Cyb5b	2.26873	7.95248	141.287	5.90129e-06	0.000485569	3894	5982	3613	24916	24403	18431
NA	Efcab4a	2.25674	4.35954	50.4008	0.00017829	0.00288189	370	259	460	2367	1910	1342
ENSMUSG00000024640	Psat1	2.25209	4.06848	233.826	1.04225e-06	0.000278647	292	354	267	1529	1551	1480
ENSMUSG00000028919	Arhgef19	2.25092	4.6632	75.7908	4.76928e-05	0.00134517	480	352	523	2252	2737	1893
NA	4930506M07Rik	2.25004	5.06568	114.771	1.19485e-05	0.000646515	610	666	546	3934	3090	2149
ENSMUSG00000004626	Stxbp2	2.24895	5.21112	78.8962	4.17831e-05	0.00124655	558	624	811	4249	3424	2465
ENSMUSG00000063646	Jakmip1	2.24421	5.23464	118.918	1.05977e-05	0.000625708	684	613	737	4017	3644	2615
ENSMUSG00000041920	Slc16a6	2.24304	3.84699	60.1172	0.000101463	0.00204101	271	214	289	1674	1380	876
ENSMUSG00000061991	Hist1h2af	2.2386	3.27289	82.5591	3.59641e-05	0.001149	173	197	158	753	742	1116
ENSMUSG00000019810	Fuca2	2.23627	4.64894	162.761	3.63752e-06	0.000419259	532	477	366	2305	2452	2054
ENSMUSG00000033295	Ptprf	2.23601	8.56977	215.768	1.37693e-06	0.000290108	6962	6537	7193	37241	35636	30606
ENSMUSG00000052397	Ezr	2.232	8.6355	100.334	1.87821e-05	0.000809304	7761	8164	6012	50581	30004	28574
ENSMUSG00000002804	Nudt14	2.22876	2.99001	59.8993	0.000102659	0.00205383	142	203	97	898	650	613
ENSMUSG00000038859	Baiap2l1	2.22065	4.59854	125.703	8.78184e-06	0.000588079	368	481	485	2670	2155	1773
ENSMUSG00000046761	Fam83h	2.2186	4.84179	206.212	1.61048e-06	0.000300151	436	614	538	2775	2619	2388
ENSMUSG00000004317	Clcn5	2.21209	5.1056	45.5996	0.000244405	0.0034527	909	389	583	3420	3035	2890
ENSMUSG00000001700	Gramd3	2.20977	5.41787	83.7937	3.4239e-05	0.00110804	853	905	631	2971	3492	5053
ENSMUSG00000052512	Nav2	2.20376	7.59699	122.673	9.53897e-06	0.000602904	3753	2871	4040	18535	17264	16697
ENSMUSG00000033389	Arhgap44	2.20326	5.49147	100.485	1.86882e-05	0.000809304	1056	846	613	4238	4568	3373
ENSMUSG00000002980	Bcam	2.20087	6.5784	147.512	5.09375e-06	0.000463502	1544	2302	1546	10896	7050	8092
ENSMUSG00000029330	Cds1	2.18872	2.89674	38.2595	0.000420988	0.00479902	141	95	173	827	699	487
ENSMUSG00000013089	Etv5	2.18582	5.79031	178.446	2.6519e-06	0.000356715	1138	1014	958	5297	4039	5639
ENSMUSG00000022636	Alcam	2.16959	6.51534	93.8116	2.35179e-05	0.000923344	1270	2224	1744	10561	7736	6531
ENSMUSG00000030793	Pycard	2.16239	3.35713	66.1793	7.43258e-05	0.00167601	206	215	164	1241	898	634
ENSMUSG00000014164	Klhl3	2.15623	2.91111	70.1903	6.13467e-05	0.00152912	149	124	152	610	760	639
ENSMUSG00000026259	Ngef	2.15355	5.29809	44.4929	0.000263928	0.0035971	542	638	1041	2872	4196	3455
ENSMUSG00000028159	Dapp1	2.14784	5.0432	69.5439	6.32298e-05	0.00154763	466	604	808	2592	3058	3179
ENSMUSG00000028456	Unc13b	2.14636	5.05542	107.179	1.50489e-05	0.000727473	789	552	563	3542	2844	2585
ENSMUSG00000021676	Iqgap2	2.1412	6.65207	142.074	5.79062e-06	0.00048419	1951	2109	1763	12037	7999	7201
ENSMUSG00000078954	Arhgap8	2.12207	2.87671	49.2385	0.000191952	0.00300214	100	147	177	654	558	747
ENSMUSG00000019872	Smpdl3a	2.1057	5.10662	67.0829	7.11159e-05	0.00164611	739	570	702	4188	2902	2195
ENSMUSG00000026972	Arrdc1	2.10552	4.22193	110.017	1.37812e-05	0.000694403	348	332	409	2020	1495	1492
ENSMUSG00000039031	Arhgap18	2.09996	5.52276	49.7159	0.000186184	0.00294788	810	750	1121	5939	3183	3294
ENSMUSG00000034285	Nipsnap1	2.09939	4.99812	154.099	4.38703e-06	0.000440504	532	795	577	2836	3160	2530
ENSMUSG00000099583	Hist1h3d	2.09808	2.72096	64.5317	8.0672e-05	0.00175806	103	159	128	510	582	654
ENSMUSG00000026576	Atp1b1	2.09438	6.60804	85.104	3.25224e-05	0.00107779	2407	1700	1655	10868	6600	8749
ENSMUSG00000025494	Sigirr	2.08586	2.20383	43.9375	0.00027448	0.00367613	89	75	105	450	449	322
ENSMUSG00000019853	Hebp2	2.08233	3.43953	52.0781	0.000160694	0.00271992	161	254	232	872	1252	749
ENSMUSG00000059323	Tonsl	2.0814	4.45997	122.412	9.60813e-06	0.000602904	483	378	442	1937	2092	1825
ENSMUSG00000057948	Unc13d	2.07528	4.11527	83.2893	3.49307e-05	0.00112572	338	333	361	1989	1528	1121
ENSMUSG00000032020	Ubash3b	2.07399	4.47922	41.7637	0.000321377	0.00399629	428	322	563	2550	2048	1371
ENSMUSG00000020774	Aspa	2.07158	2.59867	45.1404	0.000252273	0.00349679	146	141	78	584	421	602
ENSMUSG00000006782	Cnp	2.0605	5.34802	132.279	7.38536e-06	0.00054925	854	928	691	4448	3665	2764
ENSMUSG00000044469	Tnfaip8l1	2.05987	1.68637	50.3286	0.000179102	0.00288625	63	67	62	323	280	245
ENSMUSG00000023150	Ivns1abp	2.05652	7.75897	314.562	3.71183e-07	0.000229673	4220	4761	4164	19819	17384	20407
ENSMUSG00000044986	Tst	2.05083	3.39465	73.0984	5.37095e-05	0.00140107	161	235	240	965	785	1036
NA	D8Ertd82e	2.05082	6.21601	235.781	1.01259e-06	0.000278647	1617	1646	1271	7817	5999	6005
ENSMUSG00000028164	Manba	2.03808	4.62597	85.0417	3.26015e-05	0.00107779	530	515	464	2880	2158	1546
ENSMUSG00000039316	Rftn1	2.03589	5.39854	46.0022	0.000237763	0.00341817	829	677	1041	4537	4256	2425
ENSMUSG00000023913	Pla2g7	2.03018	6.25364	254.549	7.76102e-07	0.00027327	1486	1708	1503	7540	7021	5685
ENSMUSG00000035493	Tgfbi	2.02643	9.75405	47.9444	0.000208782	0.00312647	12636	21198	19511	57552	99703	69668
ENSMUSG00000031626	Sorbs2	2.02544	5.72143	69.4289	6.35726e-05	0.00155356	1219	764	1218	4817	4766	4377
ENSMUSG00000027111	Itga6	2.0118	6.07864	163.268	3.59896e-06	0.000419259	1341	1673	1212	7272	5884	4778
ENSMUSG00000041992	Rapgef5	2.00769	3.6299	37.7589	0.000438301	0.00492877	215	215	328	1558	914	820
ENSMUSG00000036617	Etl4	2.00456	6.99852	90.6245	2.63907e-05	0.000971526	1912	3242	2851	12935	11758	9148
NA	Gpr126	2.00452	3.80608	67.8835	6.84187e-05	0.00163408	301	300	269	1745	991	983
ENSMUSG00000001507	Itga3	1.99957	6.04179	82.5492	3.59784e-05	0.001149	1389	1047	1623	6012	5469	5897
ENSMUSG00000022756	Slc7a4	1.99134	2.80559	39.2788	0.000388361	0.0045443	168	147	122	908	480	465
ENSMUSG00000057286	St6galnac2	1.98862	4.62292	173.59	2.91585e-06	0.000374469	449	550	547	2205	2193	2081
ENSMUSG00000034906	Ncaph	1.98531	3.05861	59.8323	0.00010303	0.00205383	218	143	158	794	689	704
NA	Gpr56	1.98469	5.44081	49.0938	0.000193745	0.00301514	1302	688	727	3851	4168	3398
ENSMUSG00000015112	Slc25a13	1.98322	4.08055	128.97	8.04928e-06	0.000563413	335	429	309	1405	1677	1351
ENSMUSG00000019779	Frk	1.98032	4.75607	110.921	1.34063e-05	0.000690623	624	648	445	2870	2365	1896
ENSMUSG00000059456	Ptk2b	1.97602	6.35241	51.6416	0.00016505	0.00274815	2298	1232	1588	8993	6374	6233
ENSMUSG00000038700	Hoxb5	1.97467	2.98698	42.7099	0.000299794	0.00383657	185	121	187	711	787	575
ENSMUSG00000034613	Ppm1h	1.9674	4.95429	102.412	1.75346e-05	0.000799297	683	591	684	3137	2882	2136
ENSMUSG00000027452	Acss1	1.96374	5.44693	112.402	1.28199e-05	0.000674459	894	848	1018	4346	4036	3086
ENSMUSG00000026655	Fam107b	1.96124	6.31237	141.606	5.85614e-06	0.000484431	1730	1588	1731	8032	7269	5603
ENSMUSG00000034308	Sdr42e1	1.95879	2.53117	68.6196	6.60536e-05	0.0015981	116	143	110	591	435	486
ENSMUSG00000062995	Ica1	1.95436	2.88353	74.0078	5.15739e-05	0.00138462	165	151	153	753	627	551
ENSMUSG00000048763	Hoxb3	1.95211	4.17409	114.758	1.19532e-05	0.000646515	369	386	398	1429	1796	1480
ENSMUSG00000040146	Rgl3	1.95074	5.30964	153.072	4.48849e-06	0.000443771	878	922	753	3318	4028	3013
ENSMUSG00000022546	Gpt	1.94625	3.33271	73.9758	5.16471e-05	0.00138462	177	296	182	983	867	784
ENSMUSG00000004270	Lpcat3	1.94334	4.88856	122.293	9.63978e-06	0.000602904	736	613	557	2935	2671	2156
ENSMUSG00000031278	Acsl4	1.93937	6.38684	225.948	1.17375e-06	0.000278894	1630	1877	1891	7148	7583	7122
ENSMUSG00000001946	Esam	1.9356	4.3071	40.0552	0.000365657	0.00436946	350	375	540	2433	1239	1545
ENSMUSG00000049313	Sorl1	1.93126	5.87964	49.7955	0.000185244	0.002936	1281	919	1558	5302	5959	4106
ENSMUSG00000030494	Rhpn2	1.93005	4.55511	71.0165	5.90426e-05	0.00150219	519	552	458	2743	2025	1409
ENSMUSG00000033107	Rnf125	1.91051	3.21572	44.9906	0.00025491	0.00351758	180	183	239	825	982	601
ENSMUSG00000023882	Zfp54	1.90852	2.27009	52.3772	0.000157793	0.00269415	95	130	92	380	399	464
ENSMUSG00000052563	D930048N14Rik	1.90641	2.42673	54.1899	0.000141577	0.00250006	110	110	129	440	477	470
ENSMUSG00000026893	Gca	1.90409	2.07315	47.8821	0.000209639	0.00313627	86	107	83	442	352	296
NA	Fam113b	1.90308	5.08748	66.9932	7.14266e-05	0.00164611	579	852	811	2294	3392	3095
ENSMUSG00000025792	Slc25a10	1.90042	4.74597	92.936	2.42654e-05	0.000936128	494	807	493	2483	2521	1971
ENSMUSG00000042644	Itpr3	1.89548	6.63824	106.416	1.54148e-05	0.000736155	2716	2080	1794	10039	8438	7491
NA	9130017N09Rik	1.87378	4.32361	75.5792	4.81334e-05	0.0013476	414	489	438	1642	2177	1345
ENSMUSG00000034903	Cobll1	1.87274	5.24689	45.0893	0.00025317	0.00350294	788	701	1023	4582	2418	2922
ENSMUSG00000040183	Ankrd6	1.86059	5.39125	79.1056	4.14193e-05	0.00124411	1066	752	983	3913	3861	3080
ENSMUSG00000032577	Mapkapk3	1.85442	4.77485	46.0733	0.000236615	0.003408	414	674	757	2308	2805	1937
ENSMUSG00000020023	Tmcc3	1.85412	6.00178	84.3197	3.35362e-05	0.00109446	1477	1819	1092	6432	6026	4136
ENSMUSG00000006154	Eps8l1	1.847	3.87644	47.0011	0.000222257	0.00324987	229	488	295	1416	1348	1024
ENSMUSG00000048924	Ccdc125	1.84034	2.48275	58.1236	0.000113104	0.00218428	135	118	124	518	467	448
ENSMUSG00000031778	Cx3cl1	1.83399	4.64102	49.6552	0.000186905	0.00295627	542	850	352	2082	2213	2113
ENSMUSG00000022537	Tmem44	1.8288	3.55456	41.5923	0.000325497	0.0040257	214	259	325	1318	984	732
ENSMUSG00000075511	1700001L05Rik	1.82875	4.25351	49.3725	0.00019031	0.00298268	434	611	286	1608	1934	1349
ENSMUSG00000032420	Nt5e	1.82456	4.59166	53.0524	0.000151488	0.00262121	385	753	537	2028	2446	1707
ENSMUSG00000074825	Itpripl1	1.82406	4.85484	110.281	1.36701e-05	0.000694403	587	754	654	3140	2272	2064
ENSMUSG00000068747	Sort1	1.81904	6.56054	45.8197	0.000240745	0.00343307	2620	1448	2343	8651	8587	7026
ENSMUSG00000050390	C77080	1.81661	6.372	94.9284	2.26065e-05	0.000903619	2252	2106	1402	8116	7337	5870
ENSMUSG00000025813	Homer2	1.81502	4.5629	73.4206	5.29401e-05	0.00139836	608	607	427	1867	1679	2503
ENSMUSG00000029149	Krtcap3	1.81441	2.71441	47.7734	0.000211146	0.00314468	138	159	154	530	685	456
ENSMUSG00000033669	Zfp7	1.81358	4.91906	66.8869	7.17967e-05	0.00164611	554	972	596	2478	3039	2224
ENSMUSG00000045667	Smtnl2	1.81076	3.4979	106.603	1.5324e-05	0.000736155	278	255	246	1020	914	958
ENSMUSG00000030587	2200002D01Rik	1.80249	2.25737	43.7488	0.000278188	0.00370334	131	100	98	412	426	377
ENSMUSG00000040111	Gramd1b	1.80219	5.66193	92.2319	2.48888e-05	0.000952038	1397	1298	853	5146	4075	3799
ENSMUSG00000032394	Igdcc3	1.7963	3.77091	40.0863	0.000364781	0.0043675	429	323	204	1123	1329	1027
ENSMUSG00000017009	Sdc4	1.7963	8.14977	149.258	4.89297e-06	0.000456261	7148	6664	6027	25269	26627	20822
ENSMUSG00000027698	Nceh1	1.79606	5.46103	71.7591	5.70657e-05	0.00147864	907	1207	977	4634	4088	2599
ENSMUSG00000096957	E230013L22Rik	1.79253	2.60787	37.998	0.000429922	0.00486145	163	107	149	592	452	511
ENSMUSG00000073910	Mob3b	1.78698	6.01925	150.727	4.73188e-06	0.000449064	1298	1641	1611	5919	5822	4848
ENSMUSG00000027314	Dll4	1.78614	3.58089	54.3757	0.000140038	0.00247855	285	283	269	1151	1198	706
ENSMUSG00000041926	Rnpep	1.77811	5.48352	53.4545	0.000147886	0.00257338	733	1178	1239	4766	3648	3063
ENSMUSG00000052565	Hist1h1d	1.77519	5.34517	80.5861	3.89592e-05	0.00119339	990	815	1039	3032	3663	3631
ENSMUSG00000033703	Fuk	1.76713	4.77352	107.256	1.50123e-05	0.000727473	551	780	619	2601	2477	1898
ENSMUSG00000014837	4931428F04Rik	1.76708	2.76348	54.6319	0.000137951	0.00245848	188	156	135	652	510	564
ENSMUSG00000046157	Tmem229b	1.76616	4.46152	68.4078	6.67232e-05	0.0016077	617	574	381	2352	1686	1600
ENSMUSG00000022899	Slc15a2	1.7564	5.7269	41.2236	0.000334594	0.00408945	1034	989	1693	4111	4554	4766
ENSMUSG00000016477	E2f3	1.75553	3.09968	42.6322	0.000301495	0.00384804	263	162	180	735	684	752
ENSMUSG00000025921	Rdh10	1.75155	5.35288	86.5891	3.07075e-05	0.00104629	1001	1086	848	3092	2926	4337
ENSMUSG00000042784	Muc1	1.74933	3.67428	57.3721	0.000117933	0.00223021	266	350	299	1401	780	1078
ENSMUSG00000020961	Ston2	1.7482	5.65505	89.2802	2.7737e-05	0.000993202	1345	1026	1212	4468	4673	3657
ENSMUSG00000053062	Jam2	1.74315	5.61425	152.001	4.59762e-06	0.000443833	1161	1321	1052	3672	4538	4174
ENSMUSG00000039680	Mrps6	1.72912	3.85838	125.456	8.84046e-06	0.000589453	344	400	309	1185	1243	1232
ENSMUSG00000045790	Ccdc149	1.72833	3.70188	38.2789	0.000420336	0.00479624	340	421	195	1419	979	911
ENSMUSG00000028393	Alad	1.71965	5.80414	45.4985	0.00024611	0.00345947	1234	1857	1037	6555	3337	4371
ENSMUSG00000027257	Pacsin3	1.70516	6.04498	67.1903	7.07461e-05	0.0016432	1336	1441	2012	5876	5441	5351
NA	Prosapip1	1.69254	5.88731	115.061	1.18473e-05	0.000646084	1437	1304	1594	4990	4751	5152
ENSMUSG00000001552	Jup	1.69212	6.47728	67.0575	7.12035e-05	0.00164611	2069	2145	2337	9928	7118	5547
ENSMUSG00000032067	Pts	1.6774	3.35472	50.1643	0.000180967	0.00289903	223	224	304	844	857	857
ENSMUSG00000063021	Hist1h2ak	1.67503	3.98988	48.6229	0.000199732	0.00305907	277	429	472	1246	1346	1380
ENSMUSG00000054263	Lifr	1.67336	7.11398	91.4751	2.55819e-05	0.000963995	2940	3700	3683	11568	13481	9678
ENSMUSG00000066152	Slc31a2	1.67133	5.21865	113.635	1.23567e-05	0.000659122	831	1163	810	3413	3316	2621
ENSMUSG00000027346	Gpcpd1	1.67095	5.07876	98.8986	1.97113e-05	0.000833809	768	863	885	3391	2813	2303
ENSMUSG00000055612	Cdca7	1.66684	5.06536	59.9638	0.000102303	0.00205256	874	1030	627	2261	3292	2787
ENSMUSG00000026764	Kif5c	1.66417	6.29489	50.8709	0.00017312	0.00281893	1886	2659	1431	7701	7331	4703
ENSMUSG00000052459	Atp6v1a	1.65972	6.57952	96.717	2.12391e-05	0.000869176	2172	2971	2104	9039	8757	6205
NA	Lass6	1.65762	5.2727	99.9918	1.89986e-05	0.0008141	1131	922	848	3603	3309	2779
ENSMUSG00000003526	Prodh	1.65441	5.23749	66.4903	7.32004e-05	0.00166276	689	1224	950	2918	3043	3451
ENSMUSG00000026779	Mastl	1.65275	2.78964	40.1684	0.000362489	0.00434677	200	161	156	674	608	444
NA	Mtap7	1.6524	5.10983	147.593	5.08422e-06	0.000463502	757	967	882	3086	2931	2622
ENSMUSG00000028803	Nipal3	1.6481	5.31537	48.8319	0.000197046	0.00304268	824	921	1234	3715	3653	2596
ENSMUSG00000053414	Hunk	1.6425	3.86704	70.1074	6.15841e-05	0.00152912	430	332	337	1334	1048	1261
ENSMUSG00000000184	Ccnd2	1.64198	7.51449	50.3546	0.000178809	0.00288625	3138	5047	5637	15836	15844	13988
NA	Hn1l	1.63397	4.85228	59.2346	0.000106418	0.00209704	934	741	530	2275	2504	2402
NA	Pvrl2	1.62424	5.73178	117.529	1.10274e-05	0.000636003	1240	1356	1455	4883	4595	3769
ENSMUSG00000053646	Plxnb1	1.61923	6.69068	177.588	2.69621e-06	0.000359549	2655	2606	2644	8311	8721	8624
ENSMUSG00000000295	Hddc2	1.61325	4.49596	47.8214	0.000210478	0.003143	429	606	692	1688	2104	1788
ENSMUSG00000033386	Frrs1	1.60666	4.16779	85.8188	3.16321e-05	0.00106481	467	546	383	1655	1587	1219
ENSMUSG00000041313	Slc7a1	1.60122	5.89395	239.678	9.56587e-07	0.000278647	1586	1683	1352	5236	4700	4820
ENSMUSG00000069266	Hist1h4b	1.59842	2.99808	39.758	0.000374139	0.00443152	254	172	187	706	587	681
ENSMUSG00000041361	Myzap	1.59818	4.03665	57.5687	0.000116645	0.00221668	525	362	377	1438	1388	1236
ENSMUSG00000023764	Sfi1	1.59534	6.90108	51.9845	0.000161615	0.00272038	2870	2522	3773	9758	10899	8911
ENSMUSG00000045659	Plekha7	1.58109	4.33915	90.2828	2.67249e-05	0.000972723	511	504	559	1644	1539	1807
ENSMUSG00000070939	Tgfbrap1	1.57832	6.72183	115.701	1.16271e-05	0.00064007	2935	3285	2129	9419	9032	7650
NA	Inadl	1.56773	6.93486	160.047	3.85337e-06	0.000419773	2894	3386	3353	9917	10237	9978
ENSMUSG00000032667	Pon2	1.56758	5.06381	112.292	1.28622e-05	0.000674459	880	917	838	3262	2732	2276
ENSMUSG00000021215	Net1	1.56459	7.04101	93.2474	2.39961e-05	0.000934445	3213	4297	2982	12123	11803	8585
ENSMUSG00000037824	Tspan14	1.56415	5.20237	100.353	1.87704e-05	0.000809304	1085	880	927	3381	2937	2767
ENSMUSG00000040848	Sft2d2	1.56404	6.85065	152.029	4.5948e-06	0.000443833	2669	3249	3190	10109	9615	8735
ENSMUSG00000020534	Shmt1	1.56189	3.71221	56.1314	0.000126502	0.00232682	284	436	322	930	1104	1173
NA	Epb4.1	1.55999	6.71963	110.069	1.37591e-05	0.000694403	2867	2628	2809	9886	8864	7265
ENSMUSG00000030168	Adipor2	1.55962	6.90805	128.737	8.09882e-06	0.000564327	3147	3896	2556	9499	9441	10586
ENSMUSG00000022885	St6gal1	1.55876	5.89496	59.2077	0.000106574	0.00209744	1707	1670	1347	6613	4484	3663
ENSMUSG00000043207	Zmpste24	1.54685	6.49696	71.6556	5.7336e-05	0.00147906	2190	3088	1999	7964	5710	8553
ENSMUSG00000072568	Fam84b	1.54373	5.29625	101.166	1.82695e-05	0.000809304	977	989	1149	3547	2951	3162
NA	Gpr172b	1.53734	3.80945	74.8967	4.95903e-05	0.0013621	396	395	331	1374	1109	961
ENSMUSG00000034320	Slc26a2	1.52544	4.49672	94.9455	2.25929e-05	0.000903619	629	737	468	1912	1779	1828
ENSMUSG00000029994	Anxa4	1.52487	6.17705	149.23	4.8962e-06	0.000456261	1982	2259	1628	6480	6075	5173
ENSMUSG00000023963	Cyp39a1	1.51145	4.7976	37.5612	0.00044539	0.00498173	484	952	830	2154	2466	2147
ENSMUSG00000022272	Myo10	1.50766	7.26951	150.968	4.70616e-06	0.000449064	4193	4178	4148	12141	13087	12350
ENSMUSG00000029125	Stx18	1.50503	5.01986	145.293	5.36437e-06	0.000467322	907	951	788	2604	2507	2786
ENSMUSG00000028273	Pdlim5	1.50204	6.23469	91.9634	2.5132e-05	0.000952859	2395	1928	1804	6928	6108	5356
ENSMUSG00000053897	Slc39a8	1.49845	4.27758	63.7176	8.40646e-05	0.00181114	541	579	467	2037	1451	1258
ENSMUSG00000017210	Med24	1.49777	5.7028	48.6985	0.000198756	0.00305485	1080	1830	1381	4532	4907	3244
ENSMUSG00000024789	Jak2	1.49368	7.72364	132.586	7.3273e-06	0.000547565	5977	5858	5465	17261	18654	15478
ENSMUSG00000044367	Slc16a13	1.48614	2.93412	54.4337	0.000139562	0.00247578	213	221	192	698	587	568
ENSMUSG00000006356	Crip2	1.48077	6.07019	55.0616	0.000134538	0.00242642	2150	1472	1862	5933	5657	4737
ENSMUSG00000021754	Map3k1	1.46872	7.473	116.072	1.15021e-05	0.000636003	4583	5299	4866	16254	14931	11950
ENSMUSG00000028347	Tmeff1	1.46844	3.86038	53.5697	0.000146874	0.00256722	395	459	354	973	1376	1142
ENSMUSG00000023961	Enpp4	1.46702	4.68272	65.8492	7.55447e-05	0.00169363	675	917	563	2251	2246	1721
ENSMUSG00000029759	Pon3	1.46321	3.84871	68.9207	6.51163e-05	0.00158378	324	478	399	1285	1080	1120
ENSMUSG00000032666	1700025G04Rik	1.46277	5.58093	98.3297	2.00958e-05	0.000835649	1183	1502	1306	3767	4384	3404
ENSMUSG00000020629	Adi1	1.46045	5.47016	73.272	5.32933e-05	0.00139965	1286	1312	1100	2955	3586	4122
ENSMUSG00000002489	Tiam1	1.4585	5.27175	38.59	0.000410037	0.0047229	1052	843	1280	3581	3242	2535
ENSMUSG00000054027	Nt5dc3	1.45557	5.76446	97.2517	2.08511e-05	0.000857833	1676	1471	1383	4960	4501	3699
ENSMUSG00000045216	Hs6st1	1.45456	6.33071	123.849	9.23547e-06	0.000593749	2290	2322	2112	7625	6426	5458
NA	4930455F23Rik	1.45443	4.47114	89.4337	2.75789e-05	0.000990291	520	694	639	1945	1769	1644
ENSMUSG00000050912	Tmem123	1.4484	6.92838	50.2196	0.000180336	0.0028968	3769	3245	3167	8831	12352	8091
ENSMUSG00000031150	Ccdc120	1.44215	3.75592	43.7192	0.000278776	0.0037048	437	309	377	1218	1073	964
ENSMUSG00000020623	Map2k6	1.44133	5.41533	44.7268	0.000259641	0.00355118	866	1490	1251	3161	4000	3085
ENSMUSG00000028040	Efna4	1.44038	3.03828	45.1514	0.000252081	0.00349679	222	241	225	624	750	592
ENSMUSG00000034685	Fam171a2	1.43674	5.31387	45.04	0.000254036	0.00351178	1307	871	1138	3149	3484	2925
ENSMUSG00000009585	Apobec3	1.42305	4.90396	54.7398	0.000137084	0.00244867	939	727	854	2439	2678	2061
ENSMUSG00000013846	St3gal1	1.42177	6.01789	62.5415	8.92952e-05	0.00187209	2177	1869	1469	6260	5110	4250
ENSMUSG00000031959	Wdr59	1.42036	5.68604	73.71	5.2261e-05	0.00138605	1249	1533	1583	3847	4639	3833
ENSMUSG00000023048	Prr13	1.4196	5.38435	42.637	0.00030139	0.00384804	1211	1180	1152	4663	2971	2475
ENSMUSG00000030287	Itpr2	1.41504	8.61177	55.6407	0.000130109	0.00236505	9984	10280	12819	31534	34665	27546
ENSMUSG00000031700	Gpt2	1.41211	5.91722	41.4305	0.000329449	0.00406075	1523	2267	1430	3715	4897	5777
ENSMUSG00000042428	Mgat3	1.412	5.49969	148.64	4.96287e-06	0.000459704	1259	1446	1170	4129	3478	3261
ENSMUSG00000036109	Mbnl3	1.40193	3.88816	45.7834	0.000241344	0.00343684	396	571	319	1190	1292	1049
NA	2810474O19Rik	1.39729	7.56551	75.3387	4.86404e-05	0.0013476	5421	5583	5276	17203	16478	11699
ENSMUSG00000028042	Zbtb7b	1.3963	5.39657	61.1542	9.60137e-05	0.00195683	1317	1347	978	4286	3111	2724
ENSMUSG00000024597	Slc12a2	1.39321	6.6878	115.226	1.17899e-05	0.000646084	2930	3279	2703	7838	9253	7472
ENSMUSG00000027428	Rbbp9	1.38594	6.22064	50.8335	0.000173524	0.00282255	1653	2776	2076	5063	6398	6241
ENSMUSG00000000058	Cav2	1.38411	3.87914	56.0463	0.000127117	0.0023326	410	474	391	1245	1328	928
ENSMUSG00000033446	Lpar6	1.38328	3.54703	51.7363	0.000164092	0.00274389	285	420	312	1020	963	799
NA	Fam60a	1.3825	4.30077	77.5416	4.42384e-05	0.00128391	484	702	531	1586	1620	1481
NA	Mina	1.38114	4.50005	81.4247	3.76486e-05	0.00117898	612	831	537	1838	1811	1734
ENSMUSG00000039457	Ppl	1.37538	7.86183	73.3454	5.31184e-05	0.00139836	6475	8725	5281	21397	17951	16197
ENSMUSG00000035441	Myo1d	1.36291	6.15848	66.5729	7.2905e-05	0.00166092	2320	1752	2124	6152	5380	5449
ENSMUSG00000082286	Pisd-ps1	1.36131	6.46151	39.5728	0.000379555	0.00446828	2329	2365	2959	8645	7188	5182
ENSMUSG00000067995	Gtf2f2	1.35973	5.21165	53.3077	0.000149189	0.00259012	1043	1219	995	2903	3589	2279
ENSMUSG00000038936	Sccpdh	1.35602	4.14218	78.9238	4.17349e-05	0.00124655	547	506	491	1533	1248	1406
ENSMUSG00000030342	Cd9	1.35155	7.13643	78.3649	4.27248e-05	0.00126128	4223	5005	3268	12313	11777	9296
ENSMUSG00000024556	Me2	1.34525	4.74069	47.6711	0.000212575	0.00314691	943	737	673	2406	2216	1712
ENSMUSG00000062312	Erbb2	1.32886	6.5421	94.0433	2.33249e-05	0.000918099	2773	2936	2592	7117	8383	6434
ENSMUSG00000035284	Vps13c	1.32798	8.33948	90.5708	2.64429e-05	0.000971526	8422	10728	9738	28380	26046	22115
ENSMUSG00000070733	Fryl	1.32749	7.88391	66.9464	7.15891e-05	0.00164611	7653	6133	7102	18177	19284	18164
ENSMUSG00000056820	Tsnax	1.3259	6.8704	64.1675	8.21677e-05	0.0017777	3427	4464	2665	8635	10182	8691
NA	Rod1	1.32214	7.10867	100.601	1.86155e-05	0.000809304	4027	4342	3959	12854	10675	9100
ENSMUSG00000095217	Hist1h2bn	1.31809	3.08274	37.7945	0.00043704	0.00492036	248	253	252	582	697	699
ENSMUSG00000041870	Ankrd13a	1.31803	6.83841	38.0387	0.000428515	0.00485779	4317	2988	2894	10883	8926	7238
ENSMUSG00000032369	Plscr1	1.31789	3.26674	44.4147	0.000265383	0.00361056	287	299	272	926	673	669
ENSMUSG00000030246	Ldhb	1.31658	6.97194	73.8092	5.2031e-05	0.00138531	3081	4483	3729	9141	9489	10837
NA	Mllt4	1.31552	8.01683	100.772	1.85099e-05	0.000809304	7265	8426	7545	22678	21114	17257
ENSMUSG00000036825	Ssx2ip	1.30998	5.52619	69.7519	6.26158e-05	0.00153747	1129	1563	1451	4182	3525	3149
ENSMUSG00000039046	Usp6nl	1.30815	5.31076	104.619	1.63232e-05	0.000755998	1296	1291	993	3406	3014	2912
ENSMUSG00000048234	Rnf149	1.30353	6.06184	90.5085	2.65036e-05	0.000971526	2174	2134	1726	6288	4851	4601
ENSMUSG00000017721	Pigt	1.30353	6.68148	65.9736	7.50823e-05	0.00169041	3243	3518	2544	7211	9369	7415
ENSMUSG00000040268	Plekha1	1.29175	5.92441	84.8311	3.28705e-05	0.00108417	1619	2041	1851	5305	4963	3973
ENSMUSG00000024302	Dtna	1.29013	4.05709	41.8632	0.000319014	0.00398613	385	573	550	1255	1210	1418
ENSMUSG00000028124	Gclm	1.28955	3.92104	46.2084	0.000234452	0.00338631	484	563	339	1375	1094	1080
ENSMUSG00000102752	Gm7694	1.28853	3.18464	44.3425	0.000266733	0.00361958	283	263	273	770	681	671
ENSMUSG00000069793	Slfn9	1.28555	3.92859	47.2742	0.000218243	0.00320913	507	508	373	1161	1024	1365
ENSMUSG00000030602	Pak4	1.26828	5.72127	86.8436	3.04097e-05	0.00104073	1414	1962	1492	4317	4377	3597
ENSMUSG00000026672	Optn	1.25729	4.29283	51.8935	0.000162518	0.00272964	695	654	464	1581	1373	1598
ENSMUSG00000025492	Ifitm3	1.25569	7.50242	70.5066	6.04512e-05	0.00152631	5482	7031	4402	13779	15130	13174
ENSMUSG00000049866	Arl4c	1.2536	7.53042	83.1681	3.50997e-05	0.00112647	4949	7046	5213	14318	15336	13256
ENSMUSG00000032788	Pdxk	1.24918	7.87258	46.9717	0.000222694	0.00324987	7641	8703	5554	15914	21017	17242
ENSMUSG00000040811	Eml2	1.23397	4.79275	67.5814	6.94209e-05	0.00164052	717	971	897	2247	1971	2193
ENSMUSG00000061119	Prcp	1.2333	4.67225	59.8455	0.000102956	0.00205383	779	862	739	1827	2276	1771
ENSMUSG00000005447	Pafah1b3	1.23001	4.08872	61.8364	9.2632e-05	0.00191057	508	635	455	1251	1397	1270
ENSMUSG00000031987	Egln1	1.22952	6.85237	43.419	0.000284825	0.00372439	3757	4581	2597	9259	9983	7462
ENSMUSG00000039087	Rreb1	1.22659	7.3558	59.7996	0.000103212	0.0020548	5045	6235	4187	15805	11343	10908
ENSMUSG00000026915	Strbp	1.22602	6.20612	64.2664	8.17579e-05	0.00177379	2324	2185	2367	5051	5897	6042
NA	5730455O13Rik	1.22487	4.49204	48.9823	0.000195142	0.00302773	609	846	662	1508	1726	1936
ENSMUSG00000070407	Hs3st3b1	1.21896	4.19695	48.5551	0.000200614	0.00306347	571	713	453	1667	1213	1360
ENSMUSG00000066150	Slc31a1	1.21775	4.75061	61.2019	9.5772e-05	0.00195683	744	927	858	1873	2091	2218
ENSMUSG00000017734	Dbndd2	1.21717	4.60727	41.9432	0.000317132	0.00396674	782	678	811	1819	2116	1667
ENSMUSG00000027954	Efna1	1.21048	4.18362	51.6817	0.000164645	0.00274449	508	730	490	1583	1377	1227
ENSMUSG00000070643	Sox13	1.20714	5.85705	86.9181	3.03232e-05	0.00104007	1883	1760	1811	4394	4699	4222
ENSMUSG00000005958	Ephb3	1.20707	5.74013	65.4305	7.71277e-05	0.00170895	1795	1658	1585	3662	4528	4058
ENSMUSG00000016382	Pls3	1.20245	7.26402	71.5007	5.77438e-05	0.00148378	4334	6297	4087	11626	12078	11588
ENSMUSG00000033068	Entpd6	1.20228	3.9412	55.2328	0.00013321	0.00241573	441	532	480	1397	1079	1061
ENSMUSG00000031584	Gsr	1.19783	5.48914	81.4513	3.7608e-05	0.00117898	1517	1643	1130	3763	3351	3211
ENSMUSG00000031109	Enox2	1.1969	3.96627	39.3702	0.000385596	0.00451878	387	556	538	1368	1136	1087
ENSMUSG00000024659	Anxa1	1.19171	6.92392	45.9667	0.00023834	0.00342069	4664	3971	2958	10825	9076	8037
ENSMUSG00000006273	Atp6v1b2	1.18765	5.87795	67.3827	7.00901e-05	0.00164052	1567	2129	1921	5044	4578	3877
ENSMUSG00000022587	Ly6e	1.18653	6.8818	49.5252	0.00018846	0.00297384	3846	4894	2670	9688	8788	8571
NA	Nelf	1.18535	6.67848	61.5259	9.41518e-05	0.00193161	2593	3731	3468	7682	7938	7809
ENSMUSG00000022965	Ifngr2	1.18416	5.10201	51.1589	0.000170047	0.00278693	1074	1078	1115	3126	2660	2101
ENSMUSG00000045071	E130308A19Rik	1.18391	3.96045	39.1336	0.000392805	0.00457209	529	551	411	1002	1285	1253
ENSMUSG00000024812	Tjp2	1.18328	7.2848	57.2562	0.000118702	0.002242	4073	6434	4541	12484	12591	10633
ENSMUSG00000026342	Slc35f5	1.17698	5.08787	64.2036	8.20178e-05	0.00177694	1017	1145	1093	2405	2880	2462
ENSMUSG00000035413	Tmem98	1.17365	4.66988	45.9539	0.000238548	0.00342069	869	877	702	2428	1551	1864
ENSMUSG00000022964	Tmem50b	1.17236	4.36	62.6202	8.89325e-05	0.0018717	652	665	649	1758	1573	1362
ENSMUSG00000003534	Ddr1	1.16184	6.65931	71.2296	5.84665e-05	0.00149726	2714	3708	3355	7463	8042	7491
ENSMUSG00000025203	Scd2	1.16	9.36013	76.0416	4.71773e-05	0.0013366	19838	23495	20331	47838	53087	48520
ENSMUSG00000026556	Vangl2	1.15857	4.62989	67.9972	6.80464e-05	0.00163195	802	817	770	1857	2031	1736
ENSMUSG00000062127	Cttnbp2nl	1.15806	6.48588	62.5323	8.93378e-05	0.00187209	2747	3406	2568	8103	6926	5453
ENSMUSG00000021285	Ppp1r13b	1.15117	6.42942	92.1235	2.49866e-05	0.000952038	3078	2823	2464	7211	6338	6080
ENSMUSG00000039735	Fnbp1l	1.14924	6.40614	76.0465	4.71672e-05	0.0013366	2705	2866	2663	6232	7237	5766
ENSMUSG00000052566	Hook2	1.14771	5.0449	50.1581	0.000181037	0.00289903	990	1028	1170	2839	2499	2174
ENSMUSG00000037736	Limch1	1.14723	4.83665	52.2579	0.000158943	0.00270558	824	904	1032	2303	2118	2069
ENSMUSG00000024856	Cdk2ap2	1.14712	4.05754	51.692	0.00016454	0.00274449	556	604	463	1510	1159	1122
ENSMUSG00000030621	Me3	1.1449	3.75265	42.9676	0.00029424	0.00381206	391	546	383	1034	1087	930
ENSMUSG00000017286	Glod4	1.14126	5.17701	75.459	4.8386e-05	0.0013476	1049	1396	1099	2623	2806	2758
ENSMUSG00000030309	Caprin2	1.14056	4.87297	41.698	0.000322949	0.00400617	805	929	1103	2399	2167	2083
ENSMUSG00000033542	Arhgef5	1.1339	6.37692	61.5621	9.39732e-05	0.00193051	2964	2450	2671	6702	6426	5709
ENSMUSG00000079184	Mphosph8	1.13078	6.14155	67.116	7.10015e-05	0.00164611	2087	2432	2389	5527	5823	4624
ENSMUSG00000022074	Tnfrsf10b	1.1306	3.58114	52.3183	0.000158359	0.00270083	385	426	361	977	863	865
ENSMUSG00000045636	Mtus1	1.13041	7.39901	65.7881	7.57728e-05	0.00169489	4658	6378	5557	13831	13255	11164
ENSMUSG00000021109	Hif1a	1.1301	7.46486	65.1476	7.82212e-05	0.0017212	6514	5738	5062	13484	14261	12214
ENSMUSG00000018102	Hist1h2bc	1.12398	4.80092	74.2049	5.11255e-05	0.00137781	923	947	867	2011	2100	2172
ENSMUSG00000060032	H2afj	1.12261	4.54518	46.0075	0.000237678	0.00341817	696	748	838	2032	1656	1597
ENSMUSG00000032527	Pccb	1.12213	5.08015	89.9468	2.70587e-05	0.000982561	1072	1282	989	2751	2324	2573
ENSMUSG00000044072	Eml6	1.11331	3.9545	40.0187	0.000366684	0.00437541	420	561	547	1314	1113	1070
ENSMUSG00000032349	Elovl5	1.11139	6.46712	88.045	2.90525e-05	0.00101611	2941	3501	2379	6936	6674	6335
ENSMUSG00000002870	Mcm2	1.11032	5.20755	89.4268	2.7586e-05	0.000990291	1170	1427	1078	3011	2752	2569
ENSMUSG00000009569	Mkl2	1.10336	7.19523	101.643	1.79834e-05	0.000808849	4769	5526	4322	11079	11560	10313
ENSMUSG00000040548	Tex2	1.10154	6.21664	61.3302	9.51263e-05	0.00194902	2284	2924	2225	6909	4836	5069
ENSMUSG00000022210	Dhrs4	1.09793	4.29377	53.6668	0.000146029	0.00255752	601	684	662	1618	1277	1515
ENSMUSG00000001053	N4bp3	1.09493	4.69273	55.0269	0.00013481	0.00242642	820	1087	695	2030	1849	1926
ENSMUSG00000020100	Slc29a3	1.09208	5.46216	55.1285	0.000134018	0.0024247	1345	1726	1350	4079	3030	2831
ENSMUSG00000008540	Mgst1	1.08244	5.33306	38.5426	0.000411586	0.00473019	1056	1786	1240	3458	2709	2884
ENSMUSG00000039005	Tlr4	1.07735	4.6708	39.3357	0.000386636	0.00452754	894	787	862	2233	1888	1590
ENSMUSG00000038732	Mboat1	1.07663	4.66856	37.7165	0.000439811	0.00493361	812	1131	646	2067	1901	1722
ENSMUSG00000000325	Arvcf	1.07575	4.07692	44.6502	0.000261035	0.0035671	596	657	453	1397	1256	1121
ENSMUSG00000020171	Yeats4	1.0749	4.68855	38.1784	0.000423735	0.00482677	773	893	919	2056	2133	1573
ENSMUSG00000027957	Slc35a3	1.07132	4.65867	37.942	0.000431866	0.00487818	779	1119	677	2210	1754	1693
ENSMUSG00000038816	Ctnnal1	1.07018	5.65295	52.0961	0.000160517	0.00271992	1374	2086	1644	3868	3937	3427
NA	Ptplad1	1.06919	6.14743	56.9191	0.000120973	0.00226588	2298	3065	1872	5303	5130	5385
ENSMUSG00000022214	Dcaf11	1.06803	5.81366	55.786	0.000129027	0.00235293	1857	1826	1967	4915	4035	3646
ENSMUSG00000001918	Slc1a5	1.06626	6.18145	59.3005	0.000106037	0.00209704	2554	2318	2428	6117	4622	5501
ENSMUSG00000030357	Fkbp4	1.06471	7.96632	42.7785	0.000298303	0.0038326	8949	10403	6216	17893	18628	19188
ENSMUSG00000061665	Cd2ap	1.06409	7.5431	74.5815	5.02824e-05	0.00136813	5634	7154	6131	15677	13742	12286
ENSMUSG00000024942	Capn1	1.06241	7.03212	43.9683	0.000273881	0.0036747	3916	5972	3544	9914	10128	9129
ENSMUSG00000018417	Myo1b	1.05682	5.87097	63.0459	8.70023e-05	0.00185122	2129	2119	1705	5115	4202	3758
ENSMUSG00000031938	4931406C07Rik	1.05499	4.22219	55.0833	0.000134369	0.00242642	667	697	536	1503	1366	1284
ENSMUSG00000007659	Bcl2l1	1.05322	6.35372	96.1439	2.16654e-05	0.000879639	2628	3332	2412	6278	5998	5921
NA	Pppde2	1.04438	4.55134	59.2486	0.000106337	0.00209704	791	951	666	1771	1718	1710
ENSMUSG00000060002	Chpt1	1.04008	5.85035	39.4179	0.000384163	0.00451224	1702	2626	1645	4042	4642	4082
ENSMUSG00000064127	Med14	1.03691	6.12598	55.7506	0.000129289	0.00235293	2383	2565	2215	5027	5936	4487
ENSMUSG00000048911	Rnf24	1.03633	5.44689	44.906	0.000256415	0.00352263	1558	1703	1232	3162	3691	2794
ENSMUSG00000028019	Pdgfc	1.03284	6.00783	69.7993	6.24769e-05	0.00153649	2418	2374	1833	4685	4751	4797
ENSMUSG00000038312	Edem2	1.03127	4.53731	44.2158	0.000269127	0.00363575	665	886	832	1875	1706	1561
ENSMUSG00000020696	Rffl	1.03018	4.72917	51.4949	0.000166549	0.00275545	831	1085	823	2034	2105	1725
ENSMUSG00000047407	Tgif1	1.02888	5.31287	63.3457	8.5675e-05	0.00183703	1288	1443	1352	3168	3079	2552
ENSMUSG00000024913	Lrp5	1.02803	6.5959	56.4374	0.000124316	0.00230044	3644	3530	2802	8481	6752	6250
ENSMUSG00000022403	St13	1.01264	7.99658	44.4365	0.000264975	0.00360819	8396	11070	7261	17592	20647	17930
ENSMUSG00000027993	Trim2	1.01204	6.31896	51.0826	0.000170854	0.00279285	2644	3217	2456	5237	6626	5667
NA	Setd8	1.0069	5.87061	57.4268	0.000117573	0.00223021	2286	2006	1780	4806	4170	3930
ENSMUSG00000029344	Tpst2	1.00052	4.34783	49.2237	0.000192134	0.00300214	742	727	649	1714	1405	1364

## Sheet: AXIN DOWN p < 0.005, L2FC1
GeneID	GeneName	logFC	logCPM	F	PValue	FDR	C1	C2	C3	M1	M2	M3
NA	Tenc1	-1.00906	7.9694	42.9483	0.000294652	0.0038142	17124	19235	16126	7696	9585	10027
ENSMUSG00000027223	Mapk8ip1	-1.01493	5.62711	41.535	0.000326889	0.00403241	3736	3358	3215	1598	1735	2042
ENSMUSG00000040249	Lrp1	-1.01777	11.0394	43.5688	0.000281786	0.00370782	145265	160637	135657	88623	75842	65734
ENSMUSG00000005417	Mprip	-1.01966	8.74903	71.3052	5.82638e-05	0.00149466	29742	34217	26557	16929	13945	16073
ENSMUSG00000025402	Nab2	-1.02185	5.79378	87.3911	2.97813e-05	0.00102832	3889	4467	3326	2224	1869	1953
ENSMUSG00000022263	Trio	-1.0262	8.49362	44.0076	0.00027312	0.00367382	25331	22671	27011	13519	13137	12494
ENSMUSG00000032377	Plscr4	-1.03503	4.78493	43.7535	0.000278095	0.00370334	1562	2281	1964	1039	1018	922
ENSMUSG00000024548	Setbp1	-1.0362	7.65807	57.098	0.000119761	0.00225101	13727	15084	13659	6446	7446	7864
ENSMUSG00000024642	Tle4	-1.04282	5.33418	37.9245	0.000432476	0.00487962	2541	3230	2741	1882	1207	1285
ENSMUSG00000016262	Sertad4	-1.04943	4.97301	40.874	0.00034352	0.00416778	2273	2516	1862	1385	899	1105
ENSMUSG00000032238	Rora	-1.0526	4.90451	62.6498	8.87961e-05	0.00187137	1941	2241	2127	1037	1049	1119
ENSMUSG00000038679	Trps1	-1.05297	6.88125	67.3862	7.00784e-05	0.00164052	8433	8786	7674	5137	3830	3735
ENSMUSG00000025049	Taf5	-1.05405	4.16942	45.7736	0.000241505	0.00343684	1127	1477	1203	622	596	705
ENSMUSG00000052062	Pard3b	-1.05491	7.10077	50.3243	0.00017915	0.00288625	8786	10630	9586	4339	4704	5615
ENSMUSG00000024163	Mapk8ip3	-1.05504	6.9869	38.1393	0.000425066	0.00483837	8654	7793	10065	5058	4033	4531
ENSMUSG00000004631	Sgce	-1.05642	5.23307	56.8989	0.000121111	0.00226588	2765	2841	2347	1279	1224	1515
ENSMUSG00000020657	Dnajc27	-1.05759	3.97532	45.6615	0.000243369	0.00344807	1017	1284	1029	535	531	611
ENSMUSG00000031749	St3gal2	-1.05891	5.77355	48.1509	0.000205972	0.00309989	4225	4530	2895	1938	1837	2069
ENSMUSG00000095098	Ccdc85b	-1.05935	5.74598	45.6178	0.0002441	0.0034527	3729	3364	4145	1917	1906	1909
ENSMUSG00000038807	Rap1gap2	-1.05964	5.56491	38.2789	0.000420338	0.00479624	3014	4249	2835	1627	1438	1988
ENSMUSG00000052928	Ctif	-1.06065	5.27159	77.457	4.43979e-05	0.00128612	2874	3036	2286	1437	1307	1383
ENSMUSG00000014303	Glis2	-1.06798	5.97094	81.225	3.79555e-05	0.00117898	4521	5198	3648	2347	2048	2288
NA	Epb4.1l2	-1.06909	7.73324	102.353	1.75681e-05	0.000799297	14527	16050	14502	7909	7602	7147
ENSMUSG00000025477	Inpp5a	-1.07171	5.87367	67.425	6.99468e-05	0.00164052	4293	4195	3916	1896	2122	2195
ENSMUSG00000065037	Rn7sk	-1.07361	12.0374	38.0346	0.000428657	0.00485779	270524	303734	314261	161113	134987	151177
ENSMUSG00000032035	Ets1	-1.07406	6.06335	56.6441	0.000122867	0.00228207	5350	4797	4035	2466	2548	2085
ENSMUSG00000032740	Ccdc88a	-1.07622	6.3034	85.1156	3.25076e-05	0.00107779	6072	5936	4779	3078	2744	2569
ENSMUSG00000019975	Ikbip	-1.07865	4.87854	39.9125	0.000369698	0.00439917	2035	2405	1829	965	891	1252
ENSMUSG00000028134	Ptbp2	-1.07976	5.4948	41.3578	0.000331244	0.00406613	3053	2883	3550	1532	1689	1543
ENSMUSG00000004562	Arhgef40	-1.08716	7.41448	42.5699	0.000302869	0.0038543	11452	14146	10868	4897	6332	6681
ENSMUSG00000009739	Pou6f1	-1.08762	5.55088	73.6815	5.23274e-05	0.00138605	3171	3532	3259	1534	1753	1644
NA	Prkcdbp	-1.08878	5.77335	47.3605	0.000216994	0.00319684	4208	4413	3080	2231	1556	2000
ENSMUSG00000093661	Eif4e3	-1.09073	5.57733	47.7079	0.000212059	0.00314511	2876	4067	3264	1541	1558	1917
ENSMUSG00000032194	Kank2	-1.09444	7.65504	43.6041	0.000281076	0.00370782	13579	16465	13068	5776	7416	7897
ENSMUSG00000029392	Rilpl1	-1.09547	5.02109	51.7738	0.000163715	0.00274378	2058	2276	2541	1185	1073	1154
ENSMUSG00000043895	S1pr2	-1.09615	4.47975	42.8083	0.000297657	0.0038326	1721	1733	1312	919	637	795
ENSMUSG00000027695	Pld1	-1.10979	5.51691	79.9373	4.00137e-05	0.00121605	2952	3933	2957	1607	1483	1687
ENSMUSG00000016458	Wt1	-1.11178	6.88924	37.8745	0.000434223	0.00489577	9460	7902	7882	3965	3426	4961
NA	BC031353	-1.11628	5.79292	40.9509	0.000341532	0.00415342	3304	4409	4151	2364	1897	1535
ENSMUSG00000054619	Mettl7a1	-1.1175	6.75679	76.946	4.53765e-05	0.0013047	8004	8220	6956	4304	3118	3865
ENSMUSG00000023050	Map3k12	-1.12327	4.30827	44.1362	0.000270643	0.00365003	1503	1443	1292	599	750	695
ENSMUSG00000046447	Camk2n1	-1.12484	5.4921	43.5376	0.000282415	0.00370789	2851	3365	3406	1318	1672	1652
ENSMUSG00000002059	Rab34	-1.12621	5.04924	45.2104	0.000251054	0.00348926	2088	2831	2215	1006	1086	1324
ENSMUSG00000041120	Nbl1	-1.12746	8.11565	43.0635	0.000292207	0.00379525	21705	21010	16922	10200	7473	11095
ENSMUSG00000061535	C1qtnf7	-1.12813	4.33992	57.2182	0.000118955	0.00224405	1294	1679	1382	815	658	627
ENSMUSG00000025855	Prkar1b	-1.13076	4.91553	45.5444	0.000245335	0.00345947	1964	2298	2205	899	1027	1179
ENSMUSG00000021846	Peli2	-1.13264	6.6354	82.5172	3.60247e-05	0.001149	6720	7573	7048	3146	3607	3485
ENSMUSG00000029016	Clcn6	-1.13324	4.64712	42.594	0.000302336	0.00385242	2102	1609	1639	854	835	893
ENSMUSG00000019907	Ppp1r12a	-1.13432	8.24004	47.8056	0.000210698	0.003143	22007	19047	23345	11327	10473	9449
ENSMUSG00000020589	Fam49a	-1.13478	5.33963	44.3987	0.000265681	0.00361144	3256	2707	2699	1691	1342	1161
ENSMUSG00000023942	Slc29a1	-1.15426	6.38448	42.7913	0.000298026	0.0038326	5646	7639	4926	2588	2514	3416
ENSMUSG00000027220	Syt13	-1.15523	4.65061	69.9376	6.20741e-05	0.00153423	1599	1960	1854	939	799	830
ENSMUSG00000060206	Zfp462	-1.15997	5.79525	41.5896	0.000325564	0.0040257	3902	4777	3398	1642	1670	2328
ENSMUSG00000020044	Timp3	-1.1613	9.12522	53.7452	0.00014535	0.00255502	37135	45895	38059	16736	21494	18447
ENSMUSG00000023009	Nckap5l	-1.16222	5.25739	42.9271	0.000295104	0.00381474	2716	2820	2712	1343	1000	1553
ENSMUSG00000026430	Rassf5	-1.16279	5.05539	76.4338	4.63853e-05	0.00132386	2271	2916	2051	1252	1116	1021
ENSMUSG00000020105	Lrig3	-1.16331	5.63426	48.8828	0.000196399	0.00304268	3490	4208	3100	1418	1646	1967
ENSMUSG00000052534	Pbx1	-1.16814	7.9234	53.4789	0.000147671	0.00257338	16141	20952	15772	6969	8505	9071
ENSMUSG00000048537	Phldb1	-1.17375	7.9931	78.844	4.18745e-05	0.00124655	19865	20389	15200	8257	8726	8778
ENSMUSG00000098557	Kctd12	-1.17558	9.03945	54.9449	0.000135455	0.00242851	34356	49418	31583	20595	16399	16437
ENSMUSG00000019699	Akt3	-1.17621	6.86274	40.0126	0.000366857	0.00437541	7354	9624	8315	3076	4251	4373
ENSMUSG00000039942	Ptger4	-1.19272	6.63125	60.6452	9.86407e-05	0.001992	6066	9271	6433	3531	2852	3577
ENSMUSG00000075254	Heg1	-1.19459	8.29679	39.681	0.000376382	0.00444446	26452	24795	17530	9732	9316	12421
ENSMUSG00000016239	Lonrf3	-1.19648	6.39592	50.5701	0.000176406	0.00285741	4963	6792	6570	2722	2488	3215
ENSMUSG00000040415	Dtx3	-1.20074	6.33568	52.0051	0.000161412	0.00271992	5570	5713	6226	2547	2337	3176
ENSMUSG00000019539	Rcn3	-1.20181	7.08753	45.546	0.000245307	0.00345947	8920	13287	7839	4741	3788	5073
ENSMUSG00000050379	45906	-1.20247	4.72157	39.958	0.000368403	0.00439047	2184	2096	1493	790	809	1026
ENSMUSG00000037552	Plekhg2	-1.20578	6.22906	62.7687	8.82529e-05	0.00186501	5973	4805	5465	2467	2442	2563
ENSMUSG00000002602	Axl	-1.20979	8.62824	97.8818	2.04053e-05	0.000846245	29412	31791	25472	12633	13127	13566
ENSMUSG00000054580	Pla2r1	-1.21346	5.44609	39.7886	0.000373257	0.00442445	3307	2612	3495	1647	1248	1447
ENSMUSG00000023495	Pcbp4	-1.21377	4.17639	65.9464	7.51828e-05	0.00169041	1379	1326	1234	578	626	586
ENSMUSG00000059895	Ptp4a3	-1.23132	4.25973	47.6454	0.000212936	0.00314691	1414	1281	1471	739	540	612
ENSMUSG00000053080	2700081O15Rik	-1.23198	6.1933	121.637	9.81695e-06	0.000602961	5309	5647	5092	2285	2409	2496
ENSMUSG00000031983	2310022B05Rik	-1.23961	6.31113	97.0223	2.10164e-05	0.000862341	6016	6498	4998	2530	2366	2884
NA	Lepre1	-1.24308	5.02652	69.1453	6.44281e-05	0.00156951	2661	2255	2219	1119	957	1116
ENSMUSG00000044906	4930503L19Rik	-1.24475	3.34286	38.7425	0.000405108	0.00468007	595	868	767	344	309	337
ENSMUSG00000019817	Plagl1	-1.247	5.7607	50.1414	0.000181229	0.0028991	3413	4734	3833	1462	1787	2023
ENSMUSG00000040852	Plekhh2	-1.25062	6.78801	39.7297	0.000374961	0.00443785	9425	7069	7680	3289	3166	4302
ENSMUSG00000027217	Tspan18	-1.25583	5.06835	55.16	0.000133772	0.00242309	2572	2330	2453	1020	1251	983
ENSMUSG00000042302	Ehbp1	-1.259	6.79868	40.6663	0.000348969	0.00421828	6561	9950	8163	2982	3486	4299
ENSMUSG00000043496	Tril	-1.26014	4.42954	57.755	0.00011544	0.00219656	1472	1751	1532	693	803	591
ENSMUSG00000033152	Podxl2	-1.26182	4.43277	46.8384	0.000224692	0.00326976	1896	1413	1428	690	677	724
ENSMUSG00000033209	Ttc28	-1.26259	7.2638	75.2069	4.89212e-05	0.00134895	12462	10104	11139	5282	4833	4806
ENSMUSG00000034462	Pkd2	-1.2652	7.92004	68.2434	6.7249e-05	0.00161785	16807	20922	16048	6899	7482	9007
ENSMUSG00000032010	Usp2	-1.27193	6.31159	49.1278	0.000193322	0.00301514	6483	6083	5019	2062	2634	2931
ENSMUSG00000063146	Clip2	-1.27513	6.16621	62.2553	9.06304e-05	0.00188436	5989	5440	4477	2064	2198	2639
ENSMUSG00000014329	Bicc1	-1.2753	7.10797	73.3305	5.31539e-05	0.00139836	9373	11788	9492	4208	3855	5216
NA	Fam176b	-1.2806	4.92427	67.9602	6.81673e-05	0.00163232	2394	2394	1947	932	863	1118
ENSMUSG00000041801	Phlda3	-1.28378	4.53247	42.2105	0.000310947	0.00391059	1694	2117	1362	606	823	778
ENSMUSG00000022346	Myc	-1.28451	6.94414	52.2533	0.000158987	0.00270558	8112	12422	7159	3650	3851	4288
ENSMUSG00000025969	Nrp2	-1.28467	7.38221	59.8419	0.000102977	0.00205383	13320	13116	10632	6323	5621	4121
ENSMUSG00000027883	Gpsm2	-1.28883	5.30538	89.1585	2.78632e-05	0.000995416	3257	3203	2348	1319	1234	1233
ENSMUSG00000090877	Hspa1b	-1.29321	6.53521	43.6072	0.000281012	0.00370782	8204	7625	4905	3639	2535	2734
ENSMUSG00000031227	Magee1	-1.29531	4.71622	39.6576	0.000377063	0.00444912	1731	2190	1924	665	802	1026
ENSMUSG00000065126	Snord104	-1.29589	3.09762	45.61	0.000244231	0.0034527	654	708	541	270	265	278
ENSMUSG00000097772	5430416N02Rik	-1.29699	3.8074	49.9844	0.000183037	0.00291296	1023	971	1092	423	426	481
NA	B230120H23Rik	-1.29763	7.10261	49.4317	0.00018959	0.00297617	10469	12438	7931	3644	4338	5062
ENSMUSG00000059970	Hspa2	-1.29858	6.62836	74.8173	4.97634e-05	0.0013621	7905	8820	5475	3509	3044	2895
ENSMUSG00000024420	Zfp521	-1.29928	5.94823	63.7882	8.37631e-05	0.00180716	5128	4167	4360	1774	2072	2016
ENSMUSG00000033436	Armcx2	-1.32623	5.19749	52.61	0.000155582	0.00266758	2807	3098	2332	1029	987	1422
ENSMUSG00000025959	Klf7	-1.32654	4.82309	73.0452	5.3838e-05	0.00140205	1979	2161	2167	1052	866	750
ENSMUSG00000024236	Svil	-1.32734	8.71424	78.2014	4.30201e-05	0.00126517	30638	32109	31018	11600	13803	13921
ENSMUSG00000007872	Id3	-1.34441	5.49848	44.3377	0.000266823	0.00361958	2716	4563	2980	1228	1332	1635
ENSMUSG00000022434	Fam118a	-1.35513	4.92437	47.7682	0.000211217	0.00314468	2287	1893	2564	1034	949	833
ENSMUSG00000051790	Nlgn2	-1.37236	6.90491	65.6283	7.63744e-05	0.00170236	8663	10115	8335	3001	3621	4333
ENSMUSG00000036103	Colec12	-1.38158	7.30378	65.7755	7.58203e-05	0.00169489	11978	14723	9357	5223	3846	5410
ENSMUSG00000027075	Slc43a1	-1.38341	3.84537	43.9552	0.000274136	0.0036747	983	1200	1064	431	341	538
ENSMUSG00000030605	Mfge8	-1.38611	6.31956	37.9372	0.000432032	0.00487818	6154	7511	4589	1796	2669	2769
ENSMUSG00000016494	Cd34	-1.38928	6.88069	51.5305	0.000166184	0.00275235	7947	12384	6762	3436	3233	4052
ENSMUSG00000072235	Tuba1a	-1.39436	6.51318	40.0633	0.000365429	0.00436946	7483	9073	4452	2594	2576	3113
ENSMUSG00000037712	Fermt2	-1.39547	7.61182	96.0395	2.17443e-05	0.000880529	14860	15499	13965	5170	6225	6302
ENSMUSG00000038860	Garnl3	-1.39958	3.62506	42.5456	0.000303406	0.0038543	1027	868	884	370	304	441
ENSMUSG00000037664	Cdkn1c	-1.40139	6.72088	69.9315	6.20919e-05	0.00153423	7331	8753	7864	2586	3432	3481
ENSMUSG00000057706	Mex3b	-1.40415	4.95241	51.035	0.00017136	0.00279616	2080	2323	2582	775	1034	974
ENSMUSG00000035969	Rusc2	-1.40978	6.30531	91.5117	2.55478e-05	0.000963995	5598	6022	6280	2293	2126	2702
ENSMUSG00000030170	Wnt5b	-1.40982	3.57504	41.1756	0.0003358	0.00409983	767	1253	721	350	383	337
ENSMUSG00000074220	Zfp382	-1.41216	3.1286	42.3468	0.00030785	0.00388499	580	789	622	232	255	295
ENSMUSG00000029287	Tgfbr3	-1.41926	8.37865	52.0456	0.000161014	0.00271992	24238	32847	19615	8509	9582	11661
ENSMUSG00000029070	Mxra8	-1.42761	6.49596	57.8922	0.000114564	0.00219192	6100	6772	7590	2320	2537	3177
ENSMUSG00000049288	Lix1l	-1.43018	5.45152	83.5316	3.45962e-05	0.00111726	3404	3601	2991	1155	1207	1529
ENSMUSG00000043631	Ecm2	-1.43361	4.13396	98.6649	1.98681e-05	0.000833809	1418	1448	1146	547	524	491
ENSMUSG00000002083	Bbc3	-1.43605	3.99655	41.2768	0.000333261	0.00408495	1056	1171	1386	614	399	414
ENSMUSG00000072214	45905	-1.43927	4.26178	56.6586	0.000122766	0.00228207	1604	1431	1333	501	522	673
ENSMUSG00000058070	Eml1	-1.4442	6.65869	65.4615	7.70089e-05	0.00170895	8588	7924	6612	2539	2810	3567
ENSMUSG00000019843	Fyn	-1.4534	6.86009	66.3654	7.36497e-05	0.00166806	9163	10442	7196	2767	3663	3760
ENSMUSG00000038042	Ptpdc1	-1.4564	4.80038	75.2707	4.8785e-05	0.0013476	1800	2414	2176	726	843	874
ENSMUSG00000039239	Tgfb2	-1.46583	5.11368	40.7916	0.000345668	0.00418726	3108	2444	2364	1390	783	886
ENSMUSG00000036782	Klhl13	-1.46729	4.24106	74.0278	5.15282e-05	0.00138462	1385	1573	1383	511	491	648
ENSMUSG00000031586	Rbpms	-1.46776	6.68898	43.1579	0.000290222	0.00378218	7887	6155	9315	2773	3284	2950
ENSMUSG00000046768	Rhoj	-1.47105	6.23873	91.4422	2.56126e-05	0.000963995	4947	6750	5713	2044	2009	2533
ENSMUSG00000006586	Runx1t1	-1.47769	6.24519	89.8108	2.71954e-05	0.000985211	4983	7025	5539	1973	2115	2499
ENSMUSG00000042066	Tmcc2	-1.48701	5.04963	88.1939	2.88898e-05	0.00101567	2169	3120	2388	870	969	1022
ENSMUSG00000000531	Grasp	-1.48903	5.83242	57.1546	0.00011938	0.00224932	4325	4140	4593	1315	1909	1680
ENSMUSG00000021493	Pdlim7	-1.49152	6.38272	45.9306	0.000238927	0.00342069	7576	4792	6635	2327	2509	2369
ENSMUSG00000045038	Prkce	-1.49776	6.48443	43.2079	0.000289178	0.00377493	6943	9501	4588	2449	2235	3025
ENSMUSG00000050382	Kif7	-1.50116	4.83783	43.5282	0.000282604	0.00370789	2090	2084	2386	639	794	1012
NA	5031426D15Rik	-1.50455	4.17689	46.0781	0.000236537	0.003408	1320	1410	1433	419	472	653
ENSMUSG00000022231	Sema5a	-1.50841	8.78258	42.3981	0.000306694	0.00388237	32007	42721	28177	10790	10190	16663
ENSMUSG00000024008	Cpne5	-1.50944	6.03428	39.5965	0.000378857	0.00446688	4966	6008	4293	1307	1885	2380
ENSMUSG00000041734	Kirrel	-1.50989	5.96696	96.4201	2.14586e-05	0.000875841	5121	4599	4695	1769	1544	2043
ENSMUSG00000092680	Snord55	-1.5112	4.02681	37.9991	0.000429883	0.00486145	1188	1289	1281	430	342	619
ENSMUSG00000059173	Pde1a	-1.512	3.43671	45.5077	0.000245955	0.00345947	779	1109	645	298	271	354
ENSMUSG00000040152	Thbs1	-1.5157	8.93627	52.7049	0.000154692	0.00266178	44976	39937	29026	12729	12183	16852
ENSMUSG00000053198	Prx	-1.51597	3.62107	37.7464	0.000438746	0.00492881	911	780	1117	336	311	400
ENSMUSG00000037784	Dzip1l	-1.51724	4.77116	78.3956	4.26697e-05	0.00126128	2123	2012	2156	800	646	884
ENSMUSG00000006344	Ggt5	-1.51895	4.99394	41.349	0.000331462	0.00406613	3073	2343	1961	1103	961	663
NA	9030425E11Rik	-1.52485	6.16753	74.9791	4.94115e-05	0.00136005	6321	6101	4338	2416	1609	2113
NA	Selm	-1.52525	5.78321	41.3644	0.000331081	0.00406613	4337	5309	3265	1406	1193	2071
ENSMUSG00000061751	Kalrn	-1.52937	6.64373	59.6588	0.000103999	0.00206252	9193	6153	7644	2838	2641	3000
ENSMUSG00000032014	Oaf	-1.53258	5.35538	62.7701	8.82462e-05	0.00186501	3807	3171	2540	1033	1085	1337
ENSMUSG00000068742	Cry2	-1.5353	7.61176	56.5079	0.000123819	0.00229659	15005	13480	16600	7209	4544	4911
ENSMUSG00000038271	Iffo1	-1.53851	4.26918	44.0669	0.000271975	0.0036616	1380	1264	1781	607	438	585
ENSMUSG00000026840	Lamc3	-1.54055	5.88909	51.2711	0.000168868	0.00277601	4397	5819	3715	1442	1389	2150
NA	Leprel2	-1.54724	6.02537	41.1493	0.000336466	0.00410472	4765	5804	4663	1472	1451	2526
ENSMUSG00000023927	Satb1	-1.55146	5.00791	81.0127	3.82854e-05	0.00118349	2449	2554	2479	782	842	1063
ENSMUSG00000050965	Prkca	-1.55329	5.025	42.8786	0.000296143	0.00381753	3176	2410	1999	1069	660	1009
ENSMUSG00000017167	Cntnap1	-1.55835	5.19656	55.0179	0.000134881	0.00242642	2499	3443	2663	806	972	1268
ENSMUSG00000030499	Kctd15	-1.56105	4.15003	63.335	8.57221e-05	0.00183703	1371	1290	1453	422	504	547
ENSMUSG00000022098	Bmp1	-1.56317	6.23949	41.4178	0.000329763	0.00406139	7232	4263	5928	2138	1823	2338
ENSMUSG00000012017	Scarf2	-1.56756	6.21546	59.5077	0.000104853	0.00207678	6293	6160	4958	2413	1425	2369
ENSMUSG00000023169	Slc38a1	-1.5749	6.00828	59.7663	0.000103397	0.00205585	6066	4083	4787	1631	1799	1888
ENSMUSG00000002006	Pdzd4	-1.57606	5.10127	69.5495	6.32131e-05	0.00154763	2855	3171	2072	829	883	1119
ENSMUSG00000041741	Pde3a	-1.58008	5.98734	39.2484	0.000389288	0.00455169	3807	6200	4947	1252	1825	2125
ENSMUSG00000042499	Hoxd11	-1.58236	4.52553	45.1591	0.000251946	0.00349679	1660	2223	1554	480	598	809
ENSMUSG00000064966	Snord15b	-1.58493	9.38972	84.2626	3.36117e-05	0.00109461	44996	61607	51353	15982	18724	20386
ENSMUSG00000041075	Fzd7	-1.58744	6.46985	179.623	2.59257e-06	0.000354907	7473	7670	5742	2628	2247	2432
ENSMUSG00000033149	Phldb2	-1.5896	5.59357	73.7471	5.21749e-05	0.00138605	3869	3415	3963	1145	1289	1520
ENSMUSG00000040003	Magi2	-1.5911	3.5646	53.9923	0.000143238	0.00252364	910	888	959	269	329	367
ENSMUSG00000022203	Efs	-1.61099	5.26648	40.3897	0.000356399	0.00429038	2675	3679	2768	747	971	1388
NA	Gm10554	-1.61134	2.54965	42.9035	0.000295608	0.00381579	471	464	435	184	125	166
ENSMUSG00000067629	Syngap1	-1.6183	6.05061	84.6206	3.31425e-05	0.0010885	5087	6119	4519	1564	1585	2202
ENSMUSG00000020810	Cygb	-1.61895	6.79263	86.9834	3.02476e-05	0.00103978	9709	8708	7718	2483	3126	3325
ENSMUSG00000019558	Slc6a8	-1.62772	5.48147	95.5182	2.21434e-05	0.000892023	4115	3658	2804	1105	1250	1235
NA	Galntl2	-1.62889	6.23733	42.7349	0.00029925	0.00383657	6639	4258	6654	2481	1894	1731
ENSMUSG00000033420	Antxr1	-1.62987	7.62377	79.9907	3.99255e-05	0.00121576	17392	17997	11594	4794	4997	6049
ENSMUSG00000034118	Tpst1	-1.63268	5.39137	122.784	9.50978e-06	0.000602904	3522	3609	2821	1163	949	1263
ENSMUSG00000026811	St6galnac6	-1.63524	5.18341	73.1243	5.36471e-05	0.00140107	2756	2930	2886	1305	781	853
ENSMUSG00000036273	Lrrk2	-1.64891	5.08079	58.8047	0.000108943	0.00212515	2372	2402	3164	1072	720	916
ENSMUSG00000039706	Ldb2	-1.65041	4.94114	40.2828	0.000359323	0.00431551	1944	2642	2681	572	936	917
ENSMUSG00000020814	Mxra7	-1.65054	5.17578	70.6977	5.99182e-05	0.00151947	3330	2861	2380	833	890	1144
ENSMUSG00000032997	Chpf	-1.652	5.66302	90.678	2.63389e-05	0.000971526	4154	4215	3655	1420	1023	1594
ENSMUSG00000077734	Snord83b	-1.66087	3.0201	67.5615	6.94874e-05	0.00164052	562	721	640	233	198	210
ENSMUSG00000018819	Lsp1	-1.66318	8.87164	56.4362	0.000124324	0.00230044	43937	31804	34850	10165	13816	12893
ENSMUSG00000072941	Sod3	-1.66321	4.87466	45.264	0.000250124	0.00348223	2252	2963	1829	621	661	1026
ENSMUSG00000004267	Eno2	-1.66617	4.78307	85.4772	3.20536e-05	0.00107439	2503	2092	1932	645	799	721
ENSMUSG00000030554	Synm	-1.67196	6.8121	43.1005	0.000291427	0.00378831	10403	6873	9158	2294	3161	3340
ENSMUSG00000035258	Abi3bp	-1.67207	6.65697	67.6139	6.93121e-05	0.00164052	7975	6975	8839	2200	2892	2815
ENSMUSG00000024501	Dpysl3	-1.67257	6.34355	65.0281	7.86893e-05	0.00172893	8292	5562	5386	2215	1873	2309
ENSMUSG00000019823	Mical1	-1.67309	5.11047	67.4606	6.98267e-05	0.00164052	3178	2213	2747	850	940	921
ENSMUSG00000038894	Irs2	-1.67356	7.06919	188.853	2.18161e-06	0.000337207	9382	11532	11038	3838	3308	3439
ENSMUSG00000025738	Fbxl16	-1.67416	3.45342	47.5445	0.000214362	0.00316108	916	1159	567	307	276	277
ENSMUSG00000038037	Socs1	-1.67807	3.6544	67.6202	6.9291e-05	0.00164052	1063	1078	860	416	259	317
ENSMUSG00000041180	Hectd2	-1.67965	3.61931	49.955	0.000183378	0.00291352	958	840	1094	291	290	378
ENSMUSG00000030862	Cpxm2	-1.68203	5.06888	70.5121	6.04356e-05	0.00152631	2425	3435	2222	779	767	1074
ENSMUSG00000029338	Antxr2	-1.69074	6.87199	90.3183	2.66899e-05	0.000972723	9428	12075	6825	3103	2649	3384
ENSMUSG00000049115	Agtr1a	-1.69107	3.02784	48.6307	0.000199631	0.00305907	663	662	613	264	155	218
ENSMUSG00000040690	Col16a1	-1.69363	7.80947	58.6573	0.000109827	0.00213968	20984	18657	14103	5966	4317	7200
ENSMUSG00000043943	Naalad2	-1.69503	5.03874	54.9509	0.000135407	0.00242851	2411	2814	2621	637	813	1089
ENSMUSG00000020042	Btbd11	-1.7007	4.44002	55.7924	0.00012898	0.00235293	1475	1810	1884	463	507	704
ENSMUSG00000029636	Wasf3	-1.70096	4.79067	45.4561	0.000246829	0.00346223	2196	2303	2111	488	732	907
ENSMUSG00000034520	Gjc1	-1.70245	4.63539	88.6658	2.83816e-05	0.00100466	2165	2114	1675	547	638	731
ENSMUSG00000038668	Lpar1	-1.70723	6.20327	39.7022	0.000375761	0.00444152	6194	7014	4576	1238	2030	2375
ENSMUSG00000019846	Lama4	-1.71336	7.40859	54.5025	0.000139	0.00247148	16798	11230	12391	5605	3456	4120
ENSMUSG00000021318	Gli3	-1.71864	6.16162	45.0033	0.000254685	0.00351758	5529	7196	4615	1322	1689	2450
ENSMUSG00000031740	Mmp2	-1.72145	8.30996	39.1162	0.000393344	0.00457492	28819	25838	21560	5434	8002	10710
ENSMUSG00000040118	Cacna2d1	-1.72859	6.04782	58.8265	0.000108814	0.00212515	4881	6102	4966	1220	1672	2127
ENSMUSG00000029581	Fscn1	-1.73031	5.6065	75.3414	4.86347e-05	0.0013476	4440	4298	3025	1077	1122	1507
NA	Lphn1	-1.73485	7.23713	70.229	6.12362e-05	0.00152912	15068	11915	9336	3384	3676	4395
ENSMUSG00000051323	Pcdh19	-1.73587	4.74762	65.4845	7.69209e-05	0.00170895	2118	2610	1779	519	720	791
ENSMUSG00000031523	Dlc1	-1.73897	7.00403	105.518	1.58601e-05	0.000746377	10544	10426	9867	2765	3080	3872
ENSMUSG00000028469	Npr2	-1.74134	6.5256	42.7072	0.000299852	0.00383657	6867	8610	6800	1512	2376	3042
ENSMUSG00000030782	Tgfb1i1	-1.75148	5.85791	126.836	8.51835e-06	0.000575416	4905	4438	4577	1329	1389	1648
ENSMUSG00000027796	Smad9	-1.75223	3.57441	50.7866	0.000174033	0.00282785	756	1395	764	338	259	302
NA	Scn2a1	-1.75647	3.54026	52.6502	0.000155204	0.00266572	947	836	995	270	241	361
ENSMUSG00000023868	Pde10a	-1.76	3.78125	57.9513	0.000114188	0.0021916	1283	1110	921	272	366	387
ENSMUSG00000033863	Klf9	-1.76227	7.68021	118.398	1.0756e-05	0.000627477	13610	20089	16109	4995	4580	5809
ENSMUSG00000022665	Ccdc80	-1.76431	7.93411	94.2524	2.31526e-05	0.00091403	22284	20782	16183	5592	5392	7316
ENSMUSG00000031502	Col4a1	-1.77144	8.14347	40.6634	0.000349046	0.00421828	28929	16704	21965	5787	6796	8442
ENSMUSG00000045672	Col27a1	-1.77757	6.34311	39.0043	0.00039682	0.0046071	6046	5627	7752	1414	2007	2576
ENSMUSG00000040037	Negr1	-1.77912	4.06808	43.1962	0.000289422	0.00377493	1129	1490	1434	283	455	497
ENSMUSG00000042116	Vwa1	-1.78426	4.21093	47.6221	0.000213264	0.00314789	1875	1429	1176	395	389	583
ENSMUSG00000044550	Tceal3	-1.78703	3.16747	59.9307	0.000102485	0.00205356	718	932	547	200	228	233
ENSMUSG00000048388	Fam171b	-1.79078	4.13039	65.4408	7.7088e-05	0.00170895	1480	1780	1031	365	425	497
ENSMUSG00000066113	Adamtsl1	-1.79183	6.436	42.7084	0.000299827	0.00383657	5906	5975	8846	2691	1501	2246
ENSMUSG00000021838	Samd4	-1.79343	6.44089	48.5609	0.000200537	0.00306347	8307	4734	7695	2254	1982	2182
ENSMUSG00000035357	Pdzrn3	-1.80283	7.17695	77.1278	4.50252e-05	0.00130114	11250	14353	9860	2880	3227	4471
ENSMUSG00000050222	Il17d	-1.80289	3.45118	54.7001	0.000137402	0.00245153	846	1124	709	208	286	302
ENSMUSG00000026825	Dnm1	-1.80733	6.36167	86.1544	3.12251e-05	0.00105463	8137	6127	5677	1751	2040	2211
ENSMUSG00000024238	Zeb1	-1.81158	7.01404	58.9392	0.000108145	0.0021227	10639	12601	8473	2348	2945	4095
ENSMUSG00000016624	Phf21b	-1.81285	2.7402	38.6638	0.000407643	0.00470233	506	451	642	142	155	187
ENSMUSG00000002265	Peg3	-1.8162	6.23028	102.753	1.73399e-05	0.000793582	5361	6754	6180	1519	1765	2165
ENSMUSG00000047986	Palm3	-1.81791	3.23365	45.3462	0.000248707	0.00347265	822	857	617	166	236	276
ENSMUSG00000031748	Gnao1	-1.82473	4.19752	42.9232	0.000295187	0.00381474	1305	1288	1821	487	312	534
ENSMUSG00000033722	BC034090	-1.82624	4.7526	58.8398	0.000108735	0.00212515	2315	2073	2152	515	576	852
NA	Gm10808	-1.83025	2.8756	50.2558	0.000179925	0.0028932	540	725	531	143	170	213
ENSMUSG00000073557	Ppp1r12b	-1.8316	6.37162	39.0196	0.000396341	0.0046063	8174	4371	7320	1824	1804	2345
ENSMUSG00000000693	Loxl3	-1.83264	4.42716	44.2796	0.000267918	0.00362719	1744	1579	1882	363	509	669
ENSMUSG00000016763	Scube1	-1.83838	7.67761	39.1541	0.000392174	0.00457162	18236	20460	11887	4111	3603	6986
ENSMUSG00000065822	Snord15a	-1.84586	5.57711	75.2746	4.87766e-05	0.0013476	3366	3670	4543	952	1196	1260
ENSMUSG00000034839	Larp6	-1.85454	4.64332	43.5969	0.000281221	0.00370782	1869	2573	1731	381	669	716
ENSMUSG00000024524	Gnal	-1.86107	3.69371	69.9571	6.20176e-05	0.00153423	954	1103	1102	311	235	373
ENSMUSG00000050910	Cdr2l	-1.86776	5.05719	63.1647	8.64729e-05	0.00184758	3247	2766	2167	618	757	971
NA	Mtap1a	-1.87003	6.81066	65.4057	7.72227e-05	0.00170895	8788	12102	7034	2619	1964	3367
ENSMUSG00000026674	Ddr2	-1.87193	8.34429	63.5558	8.47604e-05	0.00182359	26365	28068	25402	5560	7397	9879
NA	Gm9766	-1.87668	6.03552	134.666	6.94952e-06	0.000529567	5377	4800	5808	1476	1532	1612
ENSMUSG00000029163	Emilin1	-1.88229	6.43799	79.791	4.02563e-05	0.00122103	8193	5456	7419	1972	1985	2134
ENSMUSG00000010342	Tex14	-1.88511	1.9513	37.6253	0.000443077	0.00496664	303	396	254	119	75	77
ENSMUSG00000019467	Arhgef25	-1.88521	6.66923	90.9756	2.6053e-05	0.000968782	8670	8263	8048	1973	2142	3002
NA	6030419C18Rik	-1.88596	3.98378	61.0511	9.65383e-05	0.00196197	1680	1216	989	329	372	404
ENSMUSG00000006369	Fbln1	-1.89875	8.9457	152.75	4.52102e-06	0.000443771	37190	42252	41924	11224	10255	12881
ENSMUSG00000026211	Obsl1	-1.89994	6.21166	43.5397	0.000282373	0.00370789	5528	5320	7225	1380	1385	2374
ENSMUSG00000022332	Khdrbs3	-1.90077	4.14293	61.2939	9.53084e-05	0.00195017	1857	1391	1104	435	325	470
ENSMUSG00000026421	Csrp1	-1.90175	8.27031	51.7251	0.000164206	0.00274389	34649	18486	22266	8007	6897	6640
ENSMUSG00000037852	Cpe	-1.90276	6.00274	41.6046	0.000325199	0.0040257	6515	4798	4455	982	1896	1539
ENSMUSG00000068699	Flnc	-1.91827	8.14399	56.8755	0.000121271	0.00226588	29320	18538	21494	7093	4876	7593
ENSMUSG00000028597	Gpx7	-1.92392	2.95955	48.3922	0.000202752	0.00308815	697	701	527	132	182	215
ENSMUSG00000029108	Pcdh7	-1.92912	7.58911	50.0394	0.000182401	0.00290883	17294	12018	17721	3398	4426	5301
ENSMUSG00000042804	Gpr153	-1.93317	5.32907	45.4405	0.000247095	0.00346223	4476	2900	2552	911	676	1162
ENSMUSG00000116165	Pdxp	-1.93497	2.59441	54.1528	0.000141887	0.00250268	493	626	386	133	117	160
ENSMUSG00000041329	Atp1b2	-1.94586	5.65577	64.8515	7.93873e-05	0.00173698	3841	4035	4562	817	1225	1356
NA	Gpr81	-1.9487	2.26521	38.6464	0.000408207	0.00470533	313	484	395	91	137	94
ENSMUSG00000030124	Lag3	-1.95593	3.68291	68.0128	6.79956e-05	0.00163195	983	941	1230	249	314	299
ENSMUSG00000017692	Rhbdl3	-1.96193	4.3305	129.919	7.85126e-06	0.000557115	1725	1633	1626	399	485	464
ENSMUSG00000065353	Snora73b	-1.96914	4.85211	56.8533	0.000121423	0.00226588	1874	2878	2463	464	797	659
ENSMUSG00000091971	Hspa1a	-1.9706	6.16446	85.1949	3.24074e-05	0.00107779	6727	7205	4126	2039	1322	1476
ENSMUSG00000070509	Rgma	-1.98001	7.12179	183.478	2.40983e-06	0.000346506	12419	12112	10251	2858	2874	3534
ENSMUSG00000065701	Rny1	-1.98297	2.14989	38.4054	0.000416109	0.00476446	351	328	411	83	86	123
ENSMUSG00000032374	Plod2	-1.9835	5.51867	71.1953	5.85586e-05	0.00149726	4793	3171	3396	848	1060	1127
ENSMUSG00000064945	Rny3	-1.98976	4.87295	114.584	1.20146e-05	0.000647574	2755	2332	2208	593	583	761
ENSMUSG00000037411	Serpine1	-1.99389	4.60029	48.8286	0.000197089	0.00304268	2222	1970	1852	811	451	360
ENSMUSG00000031503	Col4a2	-2.00155	7.52637	41.2225	0.000334621	0.00408945	20586	11302	13770	2974	4286	4801
ENSMUSG00000029096	Htra3	-2.0106	7.25165	58.8981	0.000108388	0.0021227	14638	12012	11422	2447	3011	4467
ENSMUSG00000033327	Tnxb	-2.01406	9.84221	58.0353	0.000113658	0.0021916	104361	60206	63882	20333	17573	22176
ENSMUSG00000050315	Synpo2	-2.01619	7.87077	38.8017	0.000403215	0.00466464	24488	13811	19605	3717	4878	6598
ENSMUSG00000045680	Tcf21	-2.03628	5.05587	49.9949	0.000182915	0.00291296	2544	3789	2145	524	633	977
ENSMUSG00000080486	Snord100	-2.03935	2.30424	46.2806	0.000233307	0.00337292	398	403	428	87	94	134
ENSMUSG00000022816	Fstl1	-2.04857	8.38081	41.7474	0.000321766	0.00399712	39255	24371	20163	5528	6590	9158
ENSMUSG00000028047	Thbs3	-2.06512	5.32073	65.6463	7.63063e-05	0.00170236	4568	2776	2686	977	695	877
ENSMUSG00000024529	Lox	-2.06634	4.81395	91.0663	2.59666e-05	0.000968782	2795	1880	2348	560	604	618
ENSMUSG00000036446	Lum	-2.07824	8.05875	76.6078	4.60393e-05	0.00131886	21813	29691	16838	4587	5068	7102
ENSMUSG00000031636	Pdlim3	-2.08617	5.27969	41.8318	0.000319759	0.00398899	4313	2480	2940	1198	621	648
ENSMUSG00000026879	Gsn	-2.09508	9.85384	86.4404	3.08834e-05	0.00104766	78388	107560	52590	18194	20326	19233
ENSMUSG00000065087	Snord22	-2.09784	5.12373	43.5793	0.000281574	0.00370782	2235	2702	3794	506	775	877
ENSMUSG00000078794	Dact3	-2.09845	5.3778	84.4828	3.33221e-05	0.00109036	3808	3268	3409	672	816	1091
ENSMUSG00000032243	Itga11	-2.10477	5.3983	56.0124	0.000127364	0.00233436	4644	2922	3059	650	981	972
ENSMUSG00000022032	Scara5	-2.11176	6.78187	61.03	9.66464e-05	0.00196197	8121	11155	8815	1457	2528	2767
ENSMUSG00000029761	Cald1	-2.1154	8.72484	68.5991	6.61181e-05	0.0015981	45338	27420	33673	8626	7272	10256
ENSMUSG00000028339	Col15a1	-2.12077	8.14143	38.4522	0.000414559	0.00475728	25290	22731	23474	3691	4740	8826
ENSMUSG00000001870	Ltbp1	-2.12213	6.4811	113.931	1.22484e-05	0.00065561	8197	6759	7604	1528	2128	1817
ENSMUSG00000030790	Adm	-2.12492	5.82889	50.1877	0.0001807	0.00289903	3540	7770	3499	1503	938	1077
ENSMUSG00000053475	Tnfaip6	-2.12745	2.46618	58.5305	0.000110594	0.00214841	589	446	363	114	111	112
ENSMUSG00000046480	Scn4b	-2.1392	1.47986	40.4984	0.000353455	0.0042649	265	285	160	60	53	55
ENSMUSG00000030409	Dmpk	-2.15514	6.03944	47.6467	0.000212918	0.00314691	6309	3569	6591	1614	1004	1378
ENSMUSG00000058297	Spock2	-2.15574	7.69189	213.626	1.42531e-06	0.000290108	18011	20949	14260	4567	3519	4438
ENSMUSG00000039384	Dusp10	-2.15637	3.9463	38.5484	0.000411396	0.00473019	1709	985	1197	466	251	223
ENSMUSG00000038587	Akap12	-2.1606	8.15594	43.9598	0.000274046	0.0036747	25178	27106	20909	3166	7005	6814
ENSMUSG00000064179	Tnnt1	-2.16422	2.79303	49.9489	0.000183449	0.00291352	507	608	643	109	182	121
ENSMUSG00000025422	Agap2	-2.16478	4.58857	40.4853	0.000353808	0.00426583	2574	1194	2256	438	459	544
ENSMUSG00000090958	Lrrc32	-2.1753	5.24949	84.0342	3.39154e-05	0.00110218	4349	2965	2411	888	719	673
ENSMUSG00000022208	Jph4	-2.17598	2.46776	66.3913	7.35562e-05	0.00166806	543	498	372	120	90	119
ENSMUSG00000031375	Bgn	-2.18643	7.88631	88.211	2.88711e-05	0.00101567	21894	19120	19410	4203	3629	6189
ENSMUSG00000037035	Inhbb	-2.19162	3.92646	41.9882	0.000316081	0.00396469	1904	1219	781	282	258	357
ENSMUSG00000028539	Artn	-2.20252	2.91762	70.7965	5.96451e-05	0.00151503	736	735	476	141	127	174
ENSMUSG00000026249	Serpine2	-2.21283	5.5077	48.0461	0.000207393	0.0031117	4177	5586	2183	888	666	1107
NA	LOC100861595	-2.21772	4.79835	55.2962	0.000132721	0.0024097	3072	1745	2257	713	398	523
ENSMUSG00000034898	Filip1	-2.2424	5.7307	45.4488	0.000246955	0.00346223	5612	2581	5220	1075	1044	936
ENSMUSG00000005611	Mrvi1	-2.24871	7.61744	66.8733	7.18445e-05	0.00164611	17259	16554	16750	2462	3796	4899
ENSMUSG00000044548	Dact1	-2.27381	4.62409	52.8014	0.000153794	0.00265135	2775	1829	1751	383	363	640
ENSMUSG00000080615	Snord99	-2.28596	2.49887	41.807	0.000320345	0.00398956	482	528	451	101	64	150
ENSMUSG00000019831	Wasf1	-2.28966	4.60731	98.8581	1.97384e-05	0.000833809	2612	2197	1537	395	443	520
ENSMUSG00000064450	Snord68	-2.32496	2.67445	42.658	0.000300928	0.00384715	481	651	531	72	114	159
ENSMUSG00000022676	Snai2	-2.33308	3.27439	106.356	1.54441e-05	0.000736155	972	785	752	163	194	168
ENSMUSG00000022324	Matn2	-2.33715	7.94772	62.4655	8.96473e-05	0.00187209	22985	22525	19021	2760	4677	5880
ENSMUSG00000033233	Trim45	-2.34107	4.97348	72.0384	5.63441e-05	0.00146239	3471	2092	2554	468	547	683
ENSMUSG00000064604	Snora44	-2.34695	3.83742	55.9199	0.00012804	0.00234397	884	1632	1243	175	282	309
NA	Gm22	-2.35099	4.63822	38.0573	0.000427876	0.00485779	2698	1946	1837	254	418	658
ENSMUSG00000034353	Ramp1	-2.37227	4.14285	116.71	1.12909e-05	0.000636003	1719	1913	1046	310	335	295
ENSMUSG00000088088	Rmrp	-2.3757	10.2188	123.811	9.24502e-06	0.000593749	93554	94944	121133	18966	21836	22485
ENSMUSG00000027210	Meis2	-2.3857	6.60541	84.7016	3.30375e-05	0.00108736	9419	5869	9833	1799	1544	1817
ENSMUSG00000031616	Ednra	-2.39164	4.76253	45.9333	0.000238884	0.00342069	2299	2438	2372	248	588	577
ENSMUSG00000026042	Col5a2	-2.42136	7.70255	43.4358	0.000284481	0.00372439	24347	10267	19208	3161	3230	4380
ENSMUSG00000049100	Pcdh10	-2.42438	1.9242	61.0977	9.63007e-05	0.0019601	320	437	248	59	63	72
ENSMUSG00000026208	Des	-2.4334	8.83473	51.4214	0.000167306	0.00276501	47444	36627	35949	4783	7472	11037
ENSMUSG00000115783	Bc1	-2.44419	5.73289	98.5466	1.99481e-05	0.000833809	4392	3659	5779	832	879	1003
ENSMUSG00000022894	Adamts5	-2.44961	5.36875	116.95	1.12128e-05	0.000636003	3036	4411	3527	523	788	781
ENSMUSG00000032387	Rbpms2	-2.46242	2.71624	62.1348	9.12006e-05	0.00189367	763	475	483	99	105	126
NA	AA667203	-2.46592	4.94236	71.6788	5.72753e-05	0.00147906	2881	2082	3061	726	384	457
ENSMUSG00000022840	Adcy5	-2.46722	5.99267	46.8989	0.000223783	0.0032596	7742	3495	5360	879	940	1381
ENSMUSG00000063430	Wscd2	-2.52376	3.43231	53.6795	0.000145918	0.00255752	1406	732	712	162	204	158
ENSMUSG00000026837	Col5a1	-2.52985	8.81875	45.6673	0.000243272	0.00344807	55020	23045	40136	6520	6255	9144
NA	9030224M15Rik	-2.54313	3.07576	45.5287	0.000245599	0.00345947	896	738	609	112	87	205
ENSMUSG00000029436	Mmp17	-2.54864	4.01801	43.1164	0.000291092	0.00378713	1978	777	1479	287	208	285
ENSMUSG00000027858	Tspan2	-2.57088	3.86891	47.7499	0.000211473	0.00314511	1734	727	1366	263	239	192
ENSMUSG00000026207	Speg	-2.57476	6.65334	74.783	4.98385e-05	0.0013621	10781	6104	9641	1375	1431	1947
ENSMUSG00000028214	Gem	-2.58541	5.94531	215.148	1.39071e-06	0.000290108	6634	5071	4758	1120	912	878
ENSMUSG00000075334	Rprm	-2.59894	3.1809	78.6566	4.22045e-05	0.00125309	916	599	878	142	119	161
ENSMUSG00000032419	Tbx18	-2.62454	1.75036	66.3243	7.37982e-05	0.00166898	352	284	259	51	43	59
ENSMUSG00000022893	Adamts1	-2.65218	8.76746	74.4829	5.05013e-05	0.00136813	35863	53149	30273	4954	5337	9318
ENSMUSG00000080478	Snord23	-2.6827	1.79122	52.9206	0.000152693	0.00263911	227	348	352	64	35	54
NA	A430110N23Rik	-2.69874	5.71248	44.2041	0.00026935	0.00363575	6874	3227	3946	478	842	964
ENSMUSG00000051331	Cacna1c	-2.70174	6.56244	56.8521	0.000121431	0.00226588	11493	5202	8491	1120	1282	1729
ENSMUSG00000030247	Kcnj8	-2.7145	3.94529	41.3866	0.000330533	0.00406613	1455	685	1915	216	234	219
ENSMUSG00000064981	Snora70	-2.71858	1.95131	48.0271	0.000207652	0.00311256	301	386	355	47	37	82
ENSMUSG00000104183	1700054O19Rik	-2.71919	3.05313	49.3157	0.000191004	0.00299053	798	607	815	99	79	180
ENSMUSG00000022836	Mylk	-2.74552	9.32813	112.169	1.29098e-05	0.000674669	69389	47354	56627	7482	8747	11144
ENSMUSG00000038319	Kcnh2	-2.74691	4.26064	65.2594	7.77867e-05	0.00171845	2042	1075	1992	226	301	287
NA	D630041G03Rik	-2.76918	1.33149	42.3443	0.000307906	0.00388499	328	184	163	43	30	32
ENSMUSG00000050503	Fbxl22	-2.77314	3.25461	45.3446	0.000248736	0.00347265	1059	559	934	206	104	95
ENSMUSG00000056427	Slit3	-2.77591	6.84282	182.981	2.43241e-06	0.000346506	10991	8953	11090	1819	1251	1767
ENSMUSG00000075707	Dio3	-2.81313	1.65645	43.4591	0.000284007	0.00372314	288	263	298	29	34	64
ENSMUSG00000024176	Sox8	-2.86522	2.78682	133.461	7.16536e-06	0.000538063	648	713	537	78	92	102
ENSMUSG00000032135	Mcam	-2.89588	5.12464	46.4757	0.000230246	0.00333803	3983	1533	3851	583	380	407
ENSMUSG00000048126	Col6a3	-2.9027	9.04449	38.8943	0.000400274	0.00463747	74732	23530	44537	6875	5029	8643
ENSMUSG00000020439	Smtn	-2.94331	7.50408	45.9124	0.000239225	0.00342069	26820	9031	13600	2763	1741	2417
ENSMUSG00000113581	Dio3os	-3.02253	1.81285	86.2666	3.10905e-05	0.00105238	310	341	318	35	38	52
ENSMUSG00000031097	Tnni2	-3.04232	1.74963	48.3446	0.000203383	0.00309215	205	283	429	31	40	47
ENSMUSG00000065196	Snord85	-3.07196	2.51073	144.769	5.43097e-06	0.000467322	471	600	517	77	55	67
ENSMUSG00000037166	Ppp1r14a	-3.11415	4.68799	134.814	6.92356e-06	0.000529567	2749	1899	2491	232	301	341
ENSMUSG00000045573	Penk	-3.14671	7.41513	46.9969	0.000222318	0.00324987	10911	25898	12299	1173	1489	2997
ENSMUSG00000067818	Myl9	-3.17024	6.13827	62.433	8.97985e-05	0.00187209	7837	4270	7361	497	731	1073
ENSMUSG00000028464	Tpm2	-3.17761	8.18932	85.4497	3.20879e-05	0.00107439	36195	16644	27943	2814	3048	3686
ENSMUSG00000101268	2010310C07Rik	-3.25557	2.9174	81.2497	3.79174e-05	0.00117898	940	567	608	110	56	71
ENSMUSG00000028354	Fmn2	-3.32172	1.5872	70.4598	6.05826e-05	0.00152631	252	218	362	33	31	25
ENSMUSG00000039103	Nexn	-3.34148	5.11134	62.5509	8.92516e-05	0.00187209	4619	1590	3407	387	335	303
ENSMUSG00000041073	Nacad	-3.35232	2.93028	58.3814	0.000111505	0.00215879	1044	387	692	91	67	66
ENSMUSG00000049112	Oxtr	-3.36542	3.10997	42.3031	0.000308838	0.0038904	1341	756	368	66	112	71
ENSMUSG00000019880	Rspo3	-3.38918	5.82737	105.395	1.59225e-05	0.000746377	6258	3352	6277	685	456	499
ENSMUSG00000067780	Pi15	-3.42661	3.57064	100.083	1.89404e-05	0.000813858	1195	1121	1068	77	89	164
ENSMUSG00000029778	Adcyap1r1	-3.43772	4.97907	71.0871	5.88511e-05	0.00149978	3315	2067	3486	260	182	434
ENSMUSG00000061353	Cxcl12	-3.45775	8.32562	146.113	5.26226e-06	0.000466864	25932	35015	31197	1935	3578	3229
ENSMUSG00000071317	Bves	-3.56813	1.79942	60.9996	9.68021e-05	0.00196256	391	209	377	29	38	21
ENSMUSG00000021319	Sfrp4	-3.6649	6.26563	118.49	1.07276e-05	0.000627477	10433	6523	5305	528	811	505
ENSMUSG00000034063	4930590J08Rik	-3.69853	0.209356	51.322	0.000168337	0.00277601	142	93	90	6	10	10
ENSMUSG00000061723	Tnnt3	-3.75651	3.71168	131.539	7.5275e-06	0.000549259	1541	976	1249	137	91	71
ENSMUSG00000026770	Il2ra	-3.79904	0.931971	59.695	0.000103796	0.00206112	239	183	127	13	19	9
ENSMUSG00000055022	Cntn1	-3.81626	3.30968	222.118	1.24537e-06	0.000279198	1150	961	778	64	82	69
ENSMUSG00000110986	Gm20276	-3.86643	2.49751	44.2526	0.000268429	0.00362966	597	234	763	34	55	29
ENSMUSG00000021136	Smoc1	-3.88831	4.29572	81.2418	3.79296e-05	0.00117898	2613	1581	1522	80	123	202
ENSMUSG00000030098	Grip2	-3.90688	2.48829	39.6994	0.000375845	0.00444152	289	330	966	28	42	44
ENSMUSG00000020395	Itk	-3.96065	1.90173	38.0447	0.000428309	0.00485779	485	265	328	50	13	12
ENSMUSG00000039264	Gimap3	-3.9672	2.29568	96.3167	2.15358e-05	0.000876675	625	364	432	42	21	34
ENSMUSG00000056755	Grm7	-4.03197	1.46809	60.564	9.90682e-05	0.00199803	257	246	297	8	25	18
ENSMUSG00000045826	Ptprcap	-4.07748	1.56101	38.8865	0.000400521	0.00463747	329	160	354	27	21	6
ENSMUSG00000044788	Fads6	-4.09724	1.36394	88.2367	2.88432e-05	0.00101567	353	239	161	17	14	15
NA	Zcchc5	-4.16912	1.15409	48.3864	0.000202829	0.00308815	324	108	206	17	13	8
ENSMUSG00000037202	Prf1	-4.34509	0.356674	67.2888	7.04095e-05	0.00164052	104	186	89	8	4	7
ENSMUSG00000006221	Hspb7	-4.38926	3.0913	80.2004	3.95817e-05	0.00121006	1105	549	843	71	28	30
ENSMUSG00000020427	Igfbp3	-4.40409	8.28857	181.345	2.5088e-06	0.000346506	24946	23536	43113	1556	1625	1466
ENSMUSG00000032085	Tagln	-4.43321	7.73719	72.5509	5.505e-05	0.00143121	32373	9229	20729	1231	738	1158
ENSMUSG00000024049	Myom1	-4.61904	5.73867	45.4916	0.000246226	0.00345947	6518	1492	7447	339	188	168
[truncated: 32 more rows]

## Sheet: AxinDEG
GeneID	GeneName	logFC	logCPM	F	PValue	FDR	C1	C2	C3	M1	M2	M3
[truncated: 1,265 more rows]

[truncated: 1 more sheets: AxinALLGene]
