# Supplementary material for: ALDH1A1+ cells are endometrial progenitors contributing to regeneration and endometriosis
Source: Research Square preprint supplement (doi:10.21203/rs.3.rs-6831916/v1), 2025-07-08
Supplement: Supplementary file 5 [file fadef362ab1bb880e18a735d.xlsx]

## Sheet: Sheet1
Patient	Sample type	RNAseq ID	Patient Age	Pathology Report + Clinical Diagnosis (if available)	Endometriosis Stage (if available)	Figure/Experiment Used in
1	Eutopic endometrium	EM5	43	Weakly proliferative endometrium	4	ALDEFLUOR assay, RNA Seq, Formation Assay
	Deep infiltrating endometriosis lesion	N/A	43	Endometriosis		ALDEFLUOR assay
2	Eutopic endometrium	EL1, EH2	39	Ovarian fossa, peritoneal and rectal endometriosis		ALDEFLUOR assay, RNA Seq, Formation Assay
3	Eutopic endometrium	EL3, EH4	34	Proliferative endometrium	1	ALDEFLUOR assay, RNA Seq
4	Deep infiltrating endometriosis lesion	DH8	39	Endometriosis	3	ALDEFLUOR assay, RNA Seq
5	Eutopic endometrium	N/A	30	Secretory endometrium	2	ALDEFLUOR assay
	Peritoneal endometriosis lesion	N/A	30	Endometriosis + endometrioma		ALDEFLUOR assay
6	Eutopic endometrium	N/A	24	Secretory endometrium	1	ALDEFLUOR assay
	Deep infiltrating endometriosis lesion	DH7	24	Endometriosis		ALDEFLUOR assay, RNA Seq
7	Eutopic endometrium	N/A	33	Adenomyosis, proliferative endometrium	N/A	Immunofluorescence of whole endometrial cross section
		RNA Seq:
		L/M = ALDH Low from ALDEFLUOR
		H = ALDH High from ALDEFLUOR
